# Supplementary material for: Epigenetic Delay in the Neurodevelopmental Trajectory of DNA Methylation States in Autism Spectrum Disorders
Source: PubMed Central journal article supplement (PMC6797928; doi:10.3389/fgene.2019.00907), 2019-10-01
Supplement: Presentation_1.pdf [file Presentation_1.pdf]

# **Delay in the neurodevelopmental trajectory of DNA methylation associated with autism in post-mortem human brain tissue**

## SUPPLEMENTARY MATERIALS

**Michael J. Corley<sup>1</sup>, Nauru Vargas-Maya<sup>1</sup>, Alina PS Pang<sup>1</sup>, Annette Lum-Jones<sup>1</sup>, Dongmei Li<sup>4</sup>, Vedbar Khadka<sup>3</sup>, Razvan Sultana<sup>1</sup>, D. Caroline Blanchard<sup>2</sup>, Alike K. Maunakea<sup>1</sup>**

<sup>1</sup>Department of Native Hawaiian Health, John A. Burns School of Medicine, University of Hawaii, Honolulu, Hawaii, USA

<sup>2</sup>Bekesy Neurobiology Laboratory, Pacific Biosciences Research Center, University of Hawaii at Manoa, Honolulu, Hawaii, USA.

<sup>3</sup>Office of Biostatistics & Quantitative Health Sciences, John A. Burns School of Medicine, University of Hawaii, Honolulu, Hawaii, USA.

<sup>4</sup>Department of Clinical and Translational Research, University of Rochester Medical Center, Rochester, New York, USA.

**Table S1.** Clinical characteristics of 34 postmortem subventricular zone (SVZ) tissue samples.

**Table S2.** Postmortem Brain Tissue Case Characteristics.

**Table S3.** Overlapping set of genes containing differentially methylated loci among young, middle, and old autism and control groups.

**Table S4.** Differentially methylated loci for previously identified autism candidate genes in the young age group.

**Table S5.** Differentially methylated loci for previously identified autism candidate genes in the middle age group.

**Table S6.** Differentially methylated loci for previously identified autism candidate genes in the old age group.

**Table S7.** Aberrantly alternatively spliced exons of autism candidate genes.

**Table S8.** Mean methylation levels ( $\beta$ -values) of autism-associated epigenetically dynamic regions (EDRs) CpG loci

**Table S9.** Total number of sequenced reads (M, million) from Illumina RNA-Seq libraries aligned to the hg19 assembly of the human genome.

**Figure S1.** Validation of Glia Cell Composition of SVZ using Cell Type Specific Reference DNA methylation dataset.

**Figure S2.** Functional annotation of genes containing differentially methylated loci in autism by database GREAT.

**Figure S3.** Autism-associated differentially methylated loci (DML) for young, middle, and old age groups at homeobox, WNT signaling, and neuron differentiation genes.

**Figure S4.** Enrichr online gene list enrichment analysis of all autism-associated differentially methylated loci related genes.

**Figure S5.** Autism-associated differentially methylated loci (DML) for young, middle, and old age groups at homeobox, WNT signaling, and neuron differentiation genes.

**Figure S6.** Sashimi plots of aberrantly alternatively spliced exons in autism.

**Table S1.** Clinical characteristics of 34 postmortem subventricular zone (SVZ) tissue samples.

| <b>Autism</b>           |                  |            |                | <b>Typically-Developing Controls</b> |                  |            |                |
|-------------------------|------------------|------------|----------------|--------------------------------------|------------------|------------|----------------|
| <i>Case ID</i>          | <i>Age (y.o)</i> | <i>Sex</i> | <i>PMI (h)</i> | <i>Case ID</i>                       | <i>Age (y.o)</i> | <i>Sex</i> | <i>PMI (h)</i> |
| <b>Young Age Group</b>  |                  |            |                | <b>Young Age Group</b>               |                  |            |                |
| AN08873                 | 5                | Male       | <b>25.5</b>    | UMB4332                              | 5                | Male       | <b>18</b>      |
| UMB1349                 | 5                | Male       | <b>39</b>      | UMB5408                              | 6.86             | Male       | <b>16</b>      |
| UMB4849                 | 7                | Male       | <b>20</b>      | UMB1674                              | 8                | Male       | <b>36</b>      |
| UMB4231                 | 8                | Male       | <b>12</b>      | UMB4337                              | 8                | Male       | <b>16</b>      |
| UMB4721                 | 8                | Male       | <b>16</b>      | UMB5391                              | 8                | Male       | <b>12</b>      |
| <i>Mean±SEM</i>         | $6.6\pm0.7$      |            | $22.5\pm4.7$   | <i>Mean±SEM</i>                      | $7.2\pm0.6$      |            | $19.6\pm4.2$   |
| <b>Middle Age Group</b> |                  |            |                | <b>Middle Age Group</b>              |                  |            |                |
| UMB5403                 | 16               | Male       | <b>35</b>      | UMB4669                              | 16               | Male       | <b>16</b>      |
| AN00764                 | 20               | Male       | <b>23.7</b>    | UMB1322                              | 16               | Male       | <b>25</b>      |
| UMB4999                 | 20               | Male       | <b>14</b>      | UMB1405                              | 21               | Male       | <b>13</b>      |
| AN02639                 | 21               | Male       | <b>21.16</b>   | UMB4786                              | 22               | Male       | <b>11</b>      |
| UMB5176                 | 22               | Male       | <b>18</b>      | UMB5342                              | 22               | Male       | <b>14</b>      |
| UMB5297                 | 33               | Male       | <b>50</b>      | UMB1866                              | 32               | Male       | <b>19</b>      |
| <i>Mean±SEM</i>         | $22.0\pm2.3$     |            | $27\pm5.4$     | <i>Mean±SEM</i>                      | $21.5\pm2.4$     |            | $16.3\pm2.1$   |
| <b>Old Age Group</b>    |                  |            |                | <b>Old Age Group</b>                 |                  |            |                |
| AN06420                 | 39               | Male       | <b>13.95</b>   | AN01410                              | 41               | Male       | <b>27.17</b>   |
| AN13287                 | 43               | Male       | <b>39.9</b>    | UMB1135                              | 42               | Male       | <b>18</b>      |
| UMB5115                 | 46               | Male       | <b>29</b>      | UMB4326                              | 46               | Male       | <b>6</b>       |
| AN09714                 | 60               | Male       | <b>26.5</b>    | UMB5498                              | 51               | Male       | <b>29</b>      |
| AN08784                 | 65               | Male       | <b>23.13</b>   | AN10723                              | 60               | Male       | <b>24.23</b>   |
| UMB5303                 | 67               | Male       | <b>16</b>      | UMB5452                              | 67               | Male       | <b>23</b>      |
| <i>Mean±SEM</i>         | $53.33\pm4.9$    |            | $24.8\pm3.9$   | <i>Mean±SEM</i>                      | $51.2\pm4.3$     |            | $21.2\pm3.4$   |

Abbreviations: PMI, postmortem interval; y.o. years old; h, hours; S.E.M. standard error of the mean.

**Table S2.** Postmortem Brain Tissue Case Characteristics

|                              | <b>Age Test Statistic</b>          | <b>PMI Test Statistic</b>          |
|------------------------------|------------------------------------|------------------------------------|
| <b>Young Age (n=5A, 5C)</b>  | <i>t</i> (8)=0.63, <i>p</i> =0.54  | <i>t</i> (8)=0.46, <i>p</i> =0.66  |
| <b>Middle Age (n=6A, 6C)</b> | <i>t</i> (10)=0.15, <i>p</i> =0.88 | <i>t</i> (10)=1.83, <i>p</i> =0.09 |
| <b>Old Age (n=6A, 6C)</b>    | <i>t</i> (10)=0.33, <i>p</i> =0.75 | <i>t</i> (10)=0.68, <i>p</i> =0.51 |
| <b>Overall (n=17A, 17C)</b>  | <i>t</i> (34)=0.11, <i>p</i> =0.90 | <i>t</i> (33)=1.84, <i>p</i> =0.07 |

Abbreviations: A, autism; C, control; PMI, postmortem interval

There were no statistically significant differences between autism-diagnosed cases and typically developing controls for age or PMI.

**Table S3.** Overlapping set of genes containing differentially methylated loci among young (blue highlight color), middle (red highlight color), and old (purple highlight color) autism-diagnosed and typically developing control groups.

| Probe ID   | Genomic Position         | Gene      | Gene Region | p-value | Mean Autism | Mean Control | Beta Diff. |
|------------|--------------------------|-----------|-------------|---------|-------------|--------------|------------|
| cg21821308 | chr2:9533606-9533607     | ASAP2     | Body        | 0.03    | 0.49        | 0.68         | -0.19      |
| cg06934572 | chr2:9458925-9458926     | ASAP2     | Body        | 0.01    | 0.76        | 0.86         | -0.11      |
| cg08844325 | chr2:9459368-9459369     | ASAP2     | Body        | 0.02    | 0.76        | 0.91         | -0.14      |
| cg09242610 | chr2:9357556-9357557     | ASAP2     | Body        | 0.03    | 0.40        | 0.29         | 0.11       |
| cg17830515 | chr7:1151900-1151901     | C7orf50   | Body        | 0.00    | 0.75        | 0.87         | -0.12      |
| cg08973950 | chr7:1083309-1083310     | C7orf50   | Body        | 0.01    | 0.78        | 0.90         | -0.11      |
| cg22785556 | chr7:1081061-1081062     | C7orf50   | Body        | 0.00    | 0.73        | 0.91         | -0.18      |
| cg20603222 | chr7:1096387-1096388     | C7orf50   | Body        | 0.02    | 0.78        | 0.91         | -0.13      |
| cg26224354 | chr7:1096374-1096375     | C7orf50   | Body        | 0.02    | 0.78        | 0.89         | -0.11      |
| cg09423312 | chr7:1163549-1163550     | C7orf50   | Body        | 0.00    | 0.21        | 0.11         | 0.10       |
| cg09462350 | chr2:237489273-237489274 | CXCR7     | Body        | 0.05    | 0.69        | 0.83         | -0.14      |
| cg15911409 | chr2:237481080-237481081 | CXCR7     | 5'UTR       | 0.01    | 0.46        | 0.68         | -0.22      |
| cg26960322 | chr2:237479015-237479016 | CXCR7     | 5'UTR       | 0.04    | 0.50        | 0.64         | -0.14      |
| cg26960322 | chr2:237479015-237479016 | CXCR7     | 5'UTR       | 0.01    | 0.62        | 0.76         | -0.14      |
| cg03626672 | chr2:237478664-237478665 | CXCR7     | 5'UTR       | 0.00    | 0.29        | 0.18         | 0.11       |
| cg00590260 | chr10:530805-530806      | DIP2C     | Body        | 0.02    | 0.29        | 0.41         | -0.12      |
| cg08324703 | chr10:679514-679515      | DIP2C     | Body        | 0.05    | 0.47        | 0.60         | -0.13      |
| cg09955645 | chr10:531098-531099      | DIP2C     | Body        | 0.00    | 0.43        | 0.53         | -0.10      |
| cg26116937 | chr10:531152-531153      | DIP2C     | Body        | 0.01    | 0.43        | 0.53         | -0.10      |
| cg27421267 | chr10:530836-530837      | DIP2C     | Body        | 0.00    | 0.52        | 0.66         | -0.14      |
| cg04720116 | chr10:679221-679222      | DIP2C     | Body        | 0.05    | 0.68        | 0.80         | -0.11      |
| cg08324703 | chr10:679514-679515      | DIP2C     | Body        | 0.04    | 0.55        | 0.67         | -0.12      |
| cg12014181 | chr10:729479-729480      | DIP2C     | Body        | 0.02    | 0.44        | 0.32         | 0.12       |
| cg12808565 | chr10:729259-729260      | DIP2C     | Body        | 0.01    | 0.47        | 0.35         | 0.12       |
| cg14072016 | chr10:384652-384653      | DIP2C     | Body        | 0.04    | 0.42        | 0.30         | 0.13       |
| cg16936421 | chr10:729226-729227      | DIP2C     | Body        | 0.00    | 0.51        | 0.40         | 0.11       |
| cg10639368 | chr2:240241218-240241219 | HDAC4     | Body        | 0.04    | 0.56        | 0.70         | -0.14      |
| cg07150777 | chr2:239996253-239996254 | HDAC4     | Body        | 0.04    | 0.72        | 0.82         | -0.10      |
| cg12877020 | chr2:239996263-239996264 | HDAC4     | Body        | 0.04    | 0.73        | 0.84         | -0.11      |
| cg25652742 | chr2:240152334-240152335 | HDAC4     | Body        | 0.03    | 0.48        | 0.59         | -0.11      |
| cg23893620 | chr4:20884385-20884386   | KCNIP4    | Body        | 0.05    | 0.22        | 0.33         | -0.11      |
| cg06773116 | chr4:20884431-20884432   | KCNIP4    | Body, 5'UTR | 0.03    | 0.57        | 0.68         | -0.11      |
| cg27196467 | chr4:21305490-21305491   | KCNIP4    | Body, 5'UTR | 0.01    | 0.35        | 0.24         | 0.10       |
| cg22121570 | chr15:37176940-37176941  | LOC145845 | Body        | 0.03    | 0.35        | 0.50         | -0.15      |
| cg26727768 | chr15:37178201-37178202  | LOC145845 | Body        | 0.01    | 0.44        | 0.58         | -0.15      |
| cg26727768 | chr15:37178201-37178202  | LOC145845 | Body        | 0.03    | 0.57        | 0.70         | -0.14      |
| cg14475966 | chr15:37169665-37169666  | LOC145845 | Body        | 0.04    | 0.66        | 0.77         | -0.11      |
| cg04723343 | chr2:238647913-238647914 | LRRFIP1   | Body        | 0.00    | 0.59        | 0.70         | -0.11      |
| cg04723343 | chr2:238647913-238647914 | LRRFIP1   | Body        | 0.00    | 0.65        | 0.76         | -0.11      |
| cg15579587 | chr2:238600061-238600062 | LRRFIP1   | Body        | 0.03    | 0.47        | 0.31         | 0.16       |

|            |                           |                |        |      |      |      |       |
|------------|---------------------------|----------------|--------|------|------|------|-------|
| cg20732304 | chr13:113752657-113752658 | <i>MCF2L</i>   | 3' UTR | 0.02 | 0.47 | 0.60 | -0.13 |
| cg17831440 | chr13:113699526-113699527 | <i>MCF2L</i>   | Body   | 0.02 | 0.54 | 0.72 | -0.17 |
| cg20732304 | chr13:113752657-113752658 | <i>MCF2L</i>   | 3' UTR | 0.05 | 0.55 | 0.65 | -0.10 |
| cg03309978 | chr13:113748255-113748256 | <i>MCF2L</i>   | Body   | 0.01 | 0.82 | 0.92 | -0.11 |
| cg03796024 | chr10:3151764-3151765     | <i>PFKP</i>    | Body   | 0.02 | 0.75 | 0.92 | -0.17 |
| cg20327845 | chr10:3138418-3138419     | <i>PFKP</i>    | Body   | 0.01 | 0.74 | 0.84 | -0.10 |
| cg20520804 | chr10:3149673-3149674     | <i>PFKP</i>    | Body   | 0.02 | 0.37 | 0.25 | 0.12  |
| cg21401095 | chr1:3078839-3078840      | <i>PRDM16</i>  | Body   | 0.02 | 0.63 | 0.82 | -0.20 |
| cg22031783 | chr1:3128606-3128607      | <i>PRDM16</i>  | Body   | 0.02 | 0.50 | 0.61 | -0.12 |
| cg24679453 | chr1:3079069-3079070      | <i>PRDM16</i>  | Body   | 0.00 | 0.61 | 0.76 | -0.15 |
| cg00806481 | chr1:2996650-2996651      | <i>PRDM16</i>  | Body   | 0.00 | 0.54 | 0.66 | -0.12 |
| cg09990962 | chr1:3164431-3164432      | <i>PRDM16</i>  | Body   | 0.00 | 0.62 | 0.73 | -0.10 |
| cg12804677 | chr1:3055958-3055959      | <i>PRDM16</i>  | Body   | 0.01 | 0.34 | 0.24 | 0.10  |
| cg18314778 | chr7:157468321-157468322  | <i>PTPRN2</i>  | Body   | 0.02 | 0.48 | 0.61 | -0.13 |
| cg20384620 | chr7:158122229-158122230  | <i>PTPRN2</i>  | Body   | 0.02 | 0.68 | 0.88 | -0.21 |
| cg22517801 | chr7:157453790-157453791  | <i>PTPRN2</i>  | Body   | 0.03 | 0.76 | 0.87 | -0.11 |
| cg25708755 | chr7:157951411-157951412  | <i>PTPRN2</i>  | Body   | 0.01 | 0.79 | 0.92 | -0.13 |
| cg08463820 | chr7:157453872-157453873  | <i>PTPRN2</i>  | Body   | 0.02 | 0.81 | 0.91 | -0.10 |
| cg18008037 | chr7:158272029-158272030  | <i>PTPRN2</i>  | Body   | 0.02 | 0.67 | 0.78 | -0.11 |
| cg19642306 | chr7:157951097-157951098  | <i>PTPRN2</i>  | Body   | 0.00 | 0.77 | 0.90 | -0.13 |
| cg22395765 | chr7:157362094-157362095  | <i>PTPRN2</i>  | Body   | 0.03 | 0.46 | 0.57 | -0.11 |
| cg04207084 | chr7:157477846-157477847  | <i>PTPRN2</i>  | Body   | 0.04 | 0.28 | 0.17 | 0.11  |
| cg05766510 | chr7:157454062-157454063  | <i>PTPRN2</i>  | Body   | 0.01 | 0.68 | 0.81 | -0.13 |
| cg11575295 | chr7:158250911-158250912  | <i>PTPRN2</i>  | Body   | 0.04 | 0.57 | 0.68 | -0.11 |
| cg16609021 | chr7:157754648-157754649  | <i>PTPRN2</i>  | Body   | 0.00 | 0.40 | 0.53 | -0.13 |
| cg17582545 | chr7:157647847-157647848  | <i>PTPRN2</i>  | Body   | 0.00 | 0.82 | 0.70 | 0.12  |
| cg24764310 | chr7:157512201-157512202  | <i>PTPRN2</i>  | Body   | 0.02 | 0.77 | 0.90 | -0.13 |
| cg27113326 | chr7:157454068-157454069  | <i>PTPRN2</i>  | Body   | 0.02 | 0.76 | 0.87 | -0.11 |
| cg20943076 | chr7:4113480-4113481      | <i>SDK1</i>    | Body   | 0.00 | 0.61 | 0.74 | -0.13 |
| cg07249765 | chr7:4244643-4244644      | <i>SDK1</i>    | Body   | 0.01 | 0.68 | 0.94 | -0.27 |
| cg13818127 | chr7:4169630-4169631      | <i>SDK1</i>    | Body   | 0.04 | 0.79 | 0.90 | -0.11 |
| cg24441899 | chr7:4244372-4244373      | <i>SDK1</i>    | Body   | 0.00 | 0.55 | 0.69 | -0.13 |
| cg23357832 | chr7:4228775-4228776      | <i>SDK1</i>    | Body   | 0.02 | 0.31 | 0.20 | 0.11  |
| cg06565641 | chr8:141359674-141359675  | <i>TRAPPC9</i> | Body   | 0.01 | 0.65 | 0.83 | -0.18 |
| cg11256152 | chr8:141359786-141359787  | <i>TRAPPC9</i> | Body   | 0.01 | 0.65 | 0.81 | -0.16 |
| cg26135849 | chr8:141359539-141359540  | <i>TRAPPC9</i> | Body   | 0.01 | 0.51 | 0.68 | -0.17 |
| cg12865888 | chr8:141220177-141220178  | <i>TRAPPC9</i> | Body   | 0.05 | 0.61 | 0.77 | -0.17 |
| cg13911501 | chr8:141220320-141220321  | <i>TRAPPC9</i> | Body   | 0.04 | 0.59 | 0.71 | -0.12 |
| cg14023573 | chr8:140971379-140971380  | <i>TRAPPC9</i> | Body   | 0.02 | 0.77 | 0.87 | -0.10 |
| cg25389145 | chr8:141220490-141220491  | <i>TRAPPC9</i> | Body   | 0.03 | 0.56 | 0.67 | -0.11 |
| cg06565641 | chr8:141359674-141359675  | <i>TRAPPC9</i> | Body   | 0.03 | 0.76 | 0.89 | -0.12 |
| cg11256152 | chr8:141359786-141359787  | <i>TRAPPC9</i> | Body   | 0.02 | 0.75 | 0.86 | -0.11 |

**Table S4.** Differentially methylated loci for previously identified autism candidate genes in the young age group. Blue text indicates hypomethylation and red text indicates hypermethylation in autism compared to control.

| Probe ID   | Genomic Position          | Gene     | Gene Region | p-value | Mean ASD | Mean Control | Beta Diff. |
|------------|---------------------------|----------|-------------|---------|----------|--------------|------------|
| cg12082025 | chr19:1064218-1064219     | ABCA7    | Body        | 0.030   | 0.75     | 0.90         | -0.15      |
| cg04908625 | chr3:123166882-123166883  | ADCY5    | 1stExon     | 0.047   | 0.32     | 0.42         | -0.11      |
| cg26848724 | chr13:31326405-31326406   | ALOX5AP  | Body        | 0.008   | 0.58     | 0.69         | -0.11      |
| cg05320533 | chr16:89541815-89541816   | ANKRD11  | 5'UTR       | 0.023   | 0.51     | 0.61         | -0.10      |
| cg03452625 | chr3:11537620-11537621    | ATG7     | Body        | 0.045   | 0.40     | 0.51         | -0.11      |
| cg23026543 | chr7:70203221-70203222    | AUTS2    | Body        | 0.023   | 0.62     | 0.72         | -0.10      |
| cg20446334 | chr17:79010458-79010459   | BAIAP2   | Body        | 0.014   | 0.34     | 0.49         | -0.15      |
| cg15867652 | chr17:79011277-79011278   | BAIAP2   | Body        | 0.046   | 0.62     | 0.73         | -0.11      |
| cg12363726 | chr17:79011542-79011543   | BAIAP2   | Body        | 0.013   | 0.59     | 0.69         | -0.10      |
| cg13610307 | chr9:140917431-140917432  | CACNA1B  | Body        | 0.020   | 0.10     | 0.24         | -0.15      |
| cg11827453 | chr9:140917413-140917414  | CACNA1B  | Body        | 0.027   | 0.14     | 0.24         | -0.11      |
| cg01799671 | chr16:81560752-81560753   | CMIP     | Body        | 0.037   | 0.53     | 0.64         | -0.11      |
| cg01494399 | chr16:81709890-81709891   | CMIP     | Body        | 0.050   | 0.64     | 0.74         | -0.10      |
| cg00852921 | chr20:62120544-62120545   | EEF1A2   | Body        | 0.021   | 0.50     | 0.61         | -0.10      |
| cg05723219 | chr4:187605157-187605158  | FAT1     | Body        | 0.023   | 0.77     | 0.87         | -0.10      |
| cg19062174 | chr2:157323390-157323391  | GPD2     | 5'UTR       | 0.009   | 0.42     | 0.55         | -0.13      |
| cg14517119 | chr5:45678610-45678611    | HCN1     | Body        | 0.029   | 0.74     | 0.85         | -0.11      |
| cg10639368 | chr2:240241218-240241219  | HDAC4    | Body        | 0.037   | 0.56     | 0.70         | -0.14      |
| cg24147543 | chr6:32554481-32554482    | HLA-DRB1 | Body        | 0.008   | 0.12     | 0.43         | -0.31      |
| cg04601775 | chr6:32557478-32557479    | HLA-DRB1 | 1stExon     | 0.020   | 0.74     | 0.63         | 0.11       |
| cg11993350 | chr6:32557404-32557405    | HLA-DRB1 | Body        | 0.025   | 0.79     | 0.66         | 0.14       |
| cg00822998 | chrX:53310810-53310811    | IQSEC2   | TSS200;Body | 0.029   | 0.47     | 0.60         | -0.12      |
| cg07787634 | chr1:241715378-241715379  | KMO      | Body        | 0.028   | 0.82     | 0.71         | 0.12       |
| cg26676468 | chr5:112539223-112539224  | MCC      | Body        | 0.044   | 0.43     | 0.63         | -0.20      |
| cg21864959 | chr1:11847863-11847864    | MTHFR    | 3'UTR       | 0.004   | 0.60     | 0.70         | -0.10      |
| cg09966204 | chr13:109741117-109741118 | MYO16    | Body        | 0.038   | 0.63     | 0.75         | -0.12      |
| cg14463068 | chr2:1820315-1820316      | MYT1L    | Body        | 0.004   | 0.53     | 0.64         | -0.11      |
| cg06115810 | chr1:66797599-66797600    | PDE4B    | Body;TSS200 | 0.024   | 0.33     | 0.49         | -0.16      |
| cg06616051 | chrX:153094332-153094333  | PDZD4    | Body        | 0.027   | 0.17     | 0.30         | -0.13      |
| cg00795205 | chr16:23916466-23916467   | PRKCB    | Body        | 0.020   | 0.63     | 0.78         | -0.15      |
| cg21464492 | chr2:1691062-1691063      | PXDN     | Body        | 0.004   | 0.75     | 0.92         | -0.17      |
| cg04995521 | chr1:8468871-8468872      | RERE     | 5'UTR;Body  | 0.008   | 0.46     | 0.59         | -0.12      |
| cg20943076 | chr7:4113480-4113481      | SDK1     | Body        | 0.004   | 0.61     | 0.74         | -0.13      |
| cg24323958 | chr1:108741884-108741885  | SLC25A24 | Body        | 0.013   | 0.52     | 0.64         | -0.12      |
| cg14506366 | chr5:1430421-1430422      | SLC6A3   | Body        | 0.001   | 0.71     | 0.81         | -0.11      |
| cg19414711 | chr7:127391366-127391367  | SND1     | Body        | 0.031   | 0.61     | 0.71         | -0.10      |
| cg23601468 | chr22:33200307-33200308   | SYN3     | Body        | 0.026   | 0.57     | 0.69         | -0.12      |
| cg03709468 | chr4:156828285-156828286  | TDO2     | Body        | 0.046   | 0.65     | 0.76         | -0.12      |
| cg03962421 | chr7:156943850-156943851  | UBE3C    | Body        | 0.021   | 0.52     | 0.63         | -0.11      |

**Table S5.** Differentially methylated loci for previously identified autism candidate genes in the middle age group. Blue text indicates hypomethylation and red text indicates hypermethylation in autism compared to control.

| Probe ID   | Genomic Position          | Gene     | Gene Region        | P-value | Mean ASD | Mean Control | Beta Diff. |
|------------|---------------------------|----------|--------------------|---------|----------|--------------|------------|
| cg05496543 | chr16:77467409-77467410   | ADAMTS18 | Body               | 0.004   | 0.70     | 0.82         | -0.12      |
| cg07212541 | chr15:101442710-101442711 | ALDH1A3  | Body               | 0.004   | 0.57     | 0.71         | -0.15      |
| cg11099722 | chr15:101442813-101442814 | ALDH1A3  | Body               | 0.041   | 0.38     | 0.51         | -0.14      |
| cg02013146 | chr16:89452259-89452260   | ANKRD11  | 5'UTR              | 0.010   | 0.77     | 0.91         | -0.14      |
| cg03484438 | chr16:89452237-89452238   | ANKRD11  | 5'UTR              | 0.004   | 0.72     | 0.87         | -0.16      |
| cg14794445 | chr15:29396429-29396430   | APBA2    | Body               | 0.007   | 0.55     | 0.69         | -0.14      |
| cg09859040 | chr15:80743325-80743326   | ARNT2    | Body               | 0.035   | 0.72     | 0.82         | -0.11      |
| cg03452625 | chr3:11537620-11537621    | ATG7     | Body               | 0.017   | 0.58     | 0.71         | -0.13      |
| cg05724997 | chr18:60988056-60988057   | BCL2     | TSS1500            | 0.012   | 0.20     | 0.30         | -0.10      |
| cg12090740 | chr18:60988058-60988059   | BCL2     | TSS1500            | 0.003   | 0.50     | 0.64         | -0.13      |
| cg10331119 | chr1:7209666-7209667      | CAMTA1   | Body               | 0.037   | 0.72     | 0.84         | -0.12      |
| cg24501872 | chr1:7562444-7562445      | CAMTA1   | Body               | 0.004   | 0.64     | 0.75         | -0.11      |
| cg27167221 | chr1:7103111-7103112      | CAMTA1   | Body               | 0.007   | 0.59     | 0.69         | -0.11      |
| cg05705335 | chr16:81520589-81520590   | CMIP     | Body               | 0.009   | 0.76     | 0.88         | -0.11      |
| cg27608563 | chr16:81518041-81518042   | CMIP     | Body               | 0.008   | 0.79     | 0.89         | -0.11      |
| cg09269891 | chr16:3843415-3843416     | CREBBP   | Body               | 0.003   | 0.64     | 0.75         | -0.11      |
| cg12149795 | chr21:47882121-47882122   | DIP2A    | Body               | 0.004   | 0.48     | 0.58         | -0.11      |
| cg03252296 | chrX:31283706-31283707    | DMD      | Body               | 0.002   | 0.60     | 0.71         | -0.11      |
| cg21548813 | chr6:291882-291883        | DUSP22   | TSS1500            | 0.007   | 0.28     | 0.53         | -0.25      |
| cg20605818 | chr10:72166322-72166323   | EIF4EBP2 | Body               | 0.005   | 0.61     | 0.71         | -0.11      |
| cg07110043 | chr1:31846397-31846398    | FABP3    | TSS1500            | 0.002   | 0.13     | 0.43         | -0.31      |
| cg08288016 | chr4:187590536-187590537  | FAT1     | Body               | 0.032   | 0.78     | 0.88         | -0.10      |
| cg09565404 | chr5:108083489-108083490  | FER      | TSS200             | 0.010   | 0.36     | 0.50         | -0.14      |
| cg15225701 | chr5:108083455-108083456  | FER      | TSS200             | 0.002   | 0.48     | 0.68         | -0.20      |
| cg07150777 | chr2:239996253-239996254  | HDAC4    | Body               | 0.039   | 0.72     | 0.82         | -0.10      |
| cg12877020 | chr2:239996263-239996264  | HDAC4    | Body               | 0.043   | 0.73     | 0.84         | -0.11      |
| cg01806261 | chr7:110722380-110722381  | IMMP2L   | Body               | 0.004   | 0.58     | 0.69         | -0.11      |
| cg13474918 | chr7:119914578-119914579  | KCND2    | 1stExon;5'UTR      | 0.030   | 0.71     | 0.82         | -0.11      |
| cg04605816 | chr20:62092443-62092444   | KCNQ2    | Body               | 0.006   | 0.69     | 0.80         | -0.11      |
| cg14498592 | chr20:62092502-62092503   | KCNQ2    | Body               | 0.025   | 0.42     | 0.58         | -0.16      |
| cg10540110 | chr1:202775609-202775610  | KDM5B    | Body               | 0.003   | 0.51     | 0.62         | -0.11      |
| cg01154445 | chr2:206548171-206548172  | NRP2     | Body               | 0.044   | 0.63     | 0.76         | -0.13      |
| cg04595505 | chr2:50572944-50572945    | NRXN1    | Body               | 0.009   | 0.65     | 0.75         | -0.10      |
| cg13015284 | chr11:64410392-64410393   | NRXN2    | 1stExon;Body;5'UTR | 0.001   | 0.49     | 0.59         | -0.10      |
| cg06115810 | chr1:66797599-66797600    | PDE4B    | Body;TSS200        | 0.005   | 0.49     | 0.64         | -0.15      |
| cg15070513 | chr17:37782685-37782686   | PPP1R1B  | TSS1500            | 0.015   | 0.35     | 0.45         | -0.10      |
| cg00120948 | chr1:8484417-8484418      | RERE     | Body;TSS1500       | 0.004   | 0.48     | 0.61         | -0.13      |
| cg19620383 | chr15:60860767-60860768   | RORA     | Body               | 0.011   | 0.75     | 0.86         | -0.10      |
| cg23074881 | chr15:60872858-60872859   | RORA     | Body               | 0.004   | 0.78     | 0.88         | -0.10      |
| cg05573767 | chr6:167171394-167171395  | RPS6KA2  | Body               | 0.009   | 0.41     | 0.52         | -0.11      |



|            |                           |         |               |       |      |      |       |
|------------|---------------------------|---------|---------------|-------|------|------|-------|
| cg20305005 | chr2:166151648-166151649  | SCN2A   | 5'UTR;TSS1500 | 0.040 | 0.62 | 0.73 | -0.11 |
| cg20314918 | chr2:166151447-166151448  | SCN2A   | 5'UTR;TSS1500 | 0.034 | 0.68 | 0.79 | -0.10 |
| cg07249765 | chr7:4244643-4244644      | SDK1    | Body          | 0.005 | 0.68 | 0.94 | -0.27 |
| cg13818127 | chr7:4169630-4169631      | SDK1    | Body          | 0.042 | 0.79 | 0.90 | -0.11 |
| cg24441899 | chr7:4244372-4244373      | SDK1    | Body          | 0.003 | 0.55 | 0.69 | -0.13 |
| cg03520624 | chr11:70516558-70516559   | SHANK2  | Body          | 0.021 | 0.70 | 0.81 | -0.11 |
| cg21810373 | chr11:70917159-70917160   | SHANK2  | 5'UTR         | 0.034 | 0.68 | 0.81 | -0.13 |
| cg02555243 | chr12:24097128-24097129   | SOX5    | 5'UTR;Body    | 0.040 | 0.66 | 0.76 | -0.10 |
| cg23601468 | chr22:33200307-33200308   | SYN3    | Body          | 0.008 | 0.71 | 0.82 | -0.11 |
| cg09228194 | chr6:33405457-33405458    | SYNGAP1 | Body          | 0.050 | 0.57 | 0.68 | -0.12 |
| cg01975591 | chrX:9432530-9432531      | TBL1X   | 5'UTR;TSS1500 | 0.047 | 0.48 | 0.58 | -0.11 |
| cg19506849 | chr10:114767609-114767610 | TCF7L2  | Body          | 0.001 | 0.81 | 0.93 | -0.12 |
| cg15637765 | chr5:14145681-14145682    | TRIO    | Body          | 0.002 | 0.58 | 0.69 | -0.11 |
| cg09593860 | chr11:113929287-113929288 | ZBTB16  | TSS1500       | 0.004 | 0.77 | 0.87 | -0.10 |
| cg14659930 | chr3:114128301-114128302  | ZBTB20  | 5'UTR         | 0.003 | 0.42 | 0.54 | -0.11 |

**Table S6.** Differentially methylated loci for previously identified autism candidate genes in the old age group. Blue text indicates hypomethylation and red text indicates hypermethylation in autism compared to control.

| Probe ID   | Genomic Position         | Gene     | Gene Region   | p-value | Mean ASD | Mean Control | Beta Diff. |
|------------|--------------------------|----------|---------------|---------|----------|--------------|------------|
| cg10140309 | chr20:49548661-49548662  | ADNP     | TSS1500       | 0.048   | 0.58     | 0.71         | -0.14      |
| cg02638523 | chr2:236548728-236548729 | AGAP1    | Body          | 0.049   | 0.64     | 0.53         | 0.10       |
| cg17665652 | chr4:114214093-114214094 | ANK2     | Body          | 0.001   | 0.31     | 0.21         | 0.10       |
| cg08311935 | chr16:89387805-89387806  | ANKRD11  | 5'UTR         | 0.002   | 0.56     | 0.45         | 0.11       |
| cg02226192 | chr16:89461734-89461735  | ANKRD11  | 5'UTR         | 0.022   | 0.28     | 0.17         | 0.10       |
| cg15840039 | chrX:66788098-66788099   | AR       | TSS1500;Body  | 0.032   | 0.37     | 0.26         | 0.10       |
| cg23603995 | chr6:157198648-157198649 | ARID1B   | Body          | 0.003   | 0.66     | 0.37         | 0.29       |
| cg24825446 | chrX:25022499-25022500   | ARX      | 3'UTR         | 0.049   | 0.36     | 0.26         | 0.11       |
| cg12220696 | chrX:77042017-77042018   | ATRX     | TSS1500       | 0.002   | 0.46     | 0.63         | -0.17      |
| cg08992499 | chr3:63956514-63956515   | ATXN7    | Body          | 0.039   | 0.53     | 0.42         | 0.11       |
| cg19685491 | chr12:2800278-2800279    | CACNA1C  | Body          | 0.020   | 0.38     | 0.24         | 0.14       |
| cg02794451 | chr12:2800446-2800447    | CACNA1C  | 3'UTR         | 0.045   | 0.30     | 0.20         | 0.10       |
| cg14113970 | chr5:110789928-110789929 | CAMK4    | Body          | 0.034   | 0.65     | 0.53         | 0.12       |
| cg00647317 | chr7:50633725-50633726   | DDC      | TSS1500       | 0.015   | 0.57     | 0.43         | 0.13       |
| cg15833940 | chr8:1526540-1526541     | DLGAP2   | Body          | 0.030   | 0.53     | 0.41         | 0.12       |
| cg00611227 | chr2:116122048-116122049 | DPP10    | Body          | 0.004   | 0.70     | 0.49         | 0.20       |
| cg04063345 | chr6:152130058-152130059 | ESR1     | Body          | 0.012   | 0.41     | 0.29         | 0.11       |
| cg15626350 | chr6:152130207-152130208 | ESR1     | Body          | 0.015   | 0.27     | 0.16         | 0.11       |
| cg24123106 | chr6:123100471-123100472 | FABP7    | TSS200        | 0.023   | 0.35     | 0.25         | 0.10       |
| cg25652742 | chr2:240152334-240152335 | HDAC4    | Body          | 0.031   | 0.48     | 0.59         | -0.11      |
| cg00598125 | chr6:32555411-32555412   | HLA-DRB1 | Body          | 0.041   | 0.55     | 0.33         | 0.22       |
| cg02361027 | chr2:170217401-170217402 | LRP2     | Body          | 0.026   | 0.42     | 0.29         | 0.13       |
| cg05180887 | chr2:1817263-1817264     | MYT1L    | Body          | 0.017   | 0.69     | 0.80         | -0.11      |
| cg14557268 | chr17:29596696-29596697  | NF1      | Body          | 0.041   | 0.45     | 0.35         | 0.10       |
| cg06057715 | chr1:61554414-61554415   | NFIA     | Body          | 0.050   | 0.69     | 0.56         | 0.13       |
| cg07592828 | chrX:70364353-70364354   | NLGN3    | TSS1500       | 0.009   | 0.41     | 0.30         | 0.11       |
| cg21884374 | chr7:107807954-107807955 | NRCAM    | Body          | 0.014   | 0.73     | 0.63         | 0.10       |
| cg25622366 | chr2:63281139-63281140   | OTX1     | Body          | 0.047   | 0.22     | 0.10         | 0.13       |
| cg00160440 | chr4:134077575-134077576 | PCDH10   | Body          | 0.021   | 0.37     | 0.27         | 0.10       |
| cg13798384 | chr13:67636112-67636113  | PCDH9    | Body          | 0.008   | 0.37     | 0.27         | 0.11       |
| cg19678392 | chr7:94953810-94953811   | PON1     | 1stExon;5'UTR | 0.013   | 0.64     | 0.49         | 0.16       |
| cg23591302 | chr12:42876090-42876091  | PRICKLE1 | 5'UTR         | 0.027   | 0.48     | 0.31         | 0.17       |
| cg23357832 | chr7:4228775-4228776     | SDK1     | Body;Body     | 0.016   | 0.31     | 0.20         | 0.11       |
| cg22335074 | chr11:70733258-70733259  | SHANK2   | Body          | 0.018   | 0.49     | 0.34         | 0.15       |
| cg11833293 | chr11:70557519-70557520  | SHANK2   | Body          | 0.015   | 0.86     | 0.75         | 0.11       |
| cg21810373 | chr11:70917159-70917160  | SHANK2   | 5'UTR         | 0.049   | 0.75     | 0.86         | -0.11      |
| cg16645977 | chr7:5342805-5342806     | SLC29A4  | 3'UTR         | 0.030   | 0.64     | 0.76         | -0.12      |

**Table S7.** Aberrantly alternatively spliced exons of autism candidate genes.

| Gene Symbol | Genomic Position         | Miso-factor | Delta-Psi | Control Read Count | Autism Read Count | Control Assigned Read Count | Autism Assigned Read Count |
|-------------|--------------------------|-------------|-----------|--------------------|-------------------|-----------------------------|----------------------------|
| ADARB1      | chr21:46554630-46554747  | 2.72        | -0.22     | 14                 | 40                | 26                          | 58                         |
| ANK3        | chr10:61841908-61841934  | 1.00E+12    | -0.17     | 235                | 158               | 278                         | 203                        |
| APBA2       | chr15:29386481-29386516  | 5.71        | -0.12     | 114                | 282               | 179                         | 410                        |
| APC         | chr5:112074050-112074157 | 22.09       | 0.41      | 25                 | 7                 | 41                          | 13                         |
| ATP2B2      | chr3:10420927-10420968   | 4.97        | -0.32     | 16                 | 38                | 58                          | 155                        |
| BIN1        | chr2:127825739-127825831 | 1.00E+12    | -0.21     | 1175               | 1049              | 1245                        | 1107                       |
| BIN1        | chr2:127809831-127809938 | 63303.83    | -0.12     | 181                | 276               | 290                         | 431                        |
| CADPS2      | chr7:122033250-122033369 | 2           | -0.11     | 22                 | 50                | 58                          | 100                        |
| CAMSAP2     | chr1:200797701-200797733 | 4.71        | -0.17     | 78                 | 45                | 106                         | 58                         |
| CNR1        | chr6:88857383-88857525   | 23.37       | 0.12      | 66                 | 23                | 2383                        | 767                        |
| CSNK1D      | chr17:80207574-80208055  | 35.88       | -0.12     | 129                | 213               | 272                         | 369                        |
| DEPDC5      | chr22:32257354-32257419  | 2.53        | -0.2      | 27                 | 26                | 44                          | 57                         |
| DLX1        | chr2:172951382-172951581 | 4.65        | -0.34     | 17                 | 25                | 204                         | 296                        |
| DMD         | chrX:31144759-31144790   | 2.68        | 0.15      | 40                 | 100               | 1673                        | 2524                       |
| DNAJC19     | chr3:180705966-180706017 | 1225.97     | -0.14     | 119                | 214               | 154                         | 273                        |
| DNM1L       | chr12:32858759-32858797  | 1.00E+12    | -0.32     | 54                 | 47                | 133                         | 88                         |
| GPHN        | chr14:67309396-67309434  | 8.13        | 0.16      | 54                 | 73                | 54                          | 73                         |
| HLA-A       | chr6:29912277-29912411   | 1.00E+12    | -0.3      | 413                | 1281              | 1315                        | 3719                       |
| HLA-A       | chr6:29912277-29912393   | 1.00E+12    | -0.27     | 760                | 1831              | 2389                        | 5220                       |
| HMGN1       | chr21:40717756-40719218  | 1.00E+12    | 0.1       | 1249               | 975               | 1433                        | 1206                       |
| HMGN1       | chr21:40717756-40717884  | 147.37      | 0.26      | 161                | 128               | 338                         | 306                        |
| HYDIN       | chr16:71061505-71061778  | 43.62       | -0.29     | 26                 | 74                | 54                          | 131                        |
| HYDIN       | chr16:70895951-70896158  | 2.12        | -0.2      | 23                 | 79                | 36                          | 116                        |
| MBD1        | chr18:47801740-47801814  | 27.14       | -0.21     | 51                 | 41                | 100                         | 79                         |
| MECP2       | chrX:153357642-153357765 | 2.92        | 0.16      | 77                 | 97                | 191                         | 253                        |
| NRCAM       | chr7:107807366-107807518 | 1.00E+12    | -0.38     | 114                | 297               | 260                         | 608                        |
| NRCAM       | chr7:107831698-107831727 | 2272.06     | -0.14     | 152                | 139               | 175                         | 163                        |
| NRCAM       | chr7:107815767-107815802 | 11.09       | -0.12     | 178                | 338               | 465                         | 796                        |
| NRCAM       | chr7:107866089-107866145 | 6.17        | 0.11      | 72                 | 142               | 107                         | 215                        |
| NRCAM       | chr7:107866089-107866145 | 6.17        | 0.11      | 228                | 266               | 369                         | 396                        |
| NRXN1       | chr2:50282093-50282182   | 54267.35    | 0.23      | 149                | 129               | 459                         | 435                        |
| NRXN2       | chr11:64393935-64394024  | 107740.24   | 0.12      | 82                 | 176               | 404                         | 925                        |
| NTNG1       | chr1:107961202-107961267 | 7.67        | -0.41     | 3                  | 47                | 13                          | 84                         |
| NTNG1       | chr1:107963706-107963765 | 13.35       | 0.22      | 2                  | 29                | 6                           | 44                         |
| NTRK3       | chr15:88524457-88524591  | 1138448.44  | 0.19      | 306                | 240               | 3873                        | 3461                       |
| PRKD1       | chr14:30125682-30125705  | 291.13      | 0.28      | 16                 | 38                | 58                          | 132                        |
| RELN        | chr7:103118836-103118841 | 39.83       | 0.16      | 63                 | 71                | 1604                        | 2050                       |
| RGS7        | chr1:240963941-240964021 | 103.42      | -0.24     | 132                | 238               | 1171                        | 2052                       |
| SBF1        | chr22:50895463-50895540  | 1.00E+12    | 0.2       | 73                 | 149               | 156                         | 317                        |
| SETD5       | chr3:9476274-9476314     | 6.24        | -0.15     | 48                 | 39                | 76                          | 65                         |
| SETD5       | chr3:9475054-9475246     | 3.08        | 0.22      | 54                 | 35                | 91                          | 75                         |
| SHANK1      | chr19:51190274-51190297  | 15.38       | -0.24     | 37                 | 59                | 37                          | 59                         |
| SLC4A10     | chr2:162834232-162834270 | 1.00E+12    | 0.3       | 47                 | 242               | 731                         | 4440                       |

|         |                          |       |       |     |     |      |      |
|---------|--------------------------|-------|-------|-----|-----|------|------|
| SNRPN   | chr15:25074945-25075052  | 5.23  | -0.28 | 16  | 55  | 46   | 127  |
| SPAST   | chr2:32323865-32323960   | 2.98  | -0.17 | 39  | 34  | 100  | 83   |
| SYNE1   | chr6:152466622-152466690 | 42.7  | 0.13  | 186 | 258 | 445  | 684  |
| SYNGAP1 | chr6:33416566-33416645   | 10.32 | -0.11 | 24  | 25  | 3137 | 5056 |
| SYNGAP1 | chr6:33410230-33410271   | 2.03  | 0.13  | 94  | 165 | 899  | 1384 |
| TBC1D5  | chr3:17469942-17470011   | 2.09  | -0.13 | 50  | 22  | 63   | 35   |
| TBC1D5  | chr3:17603511-17603634   | 2.37  | 0.15  | 27  | 31  | 50   | 59   |
| TBC1D5  | chr3:17627845-17628049   | 5.96  | 0.21  | 27  | 31  | 43   | 53   |
| TTN     | chr2:179392173-179392475 | 2.87  | 0.28  | 34  | 24  | 180  | 111  |
| ZNF517  | chr8:146029026-146029152 | 2.32  | 0.16  | 45  | 49  | 46   | 53   |

**Table S8.** Mean methylation levels ( $\beta$ -values) of autism-associated epigenetically dynamic regions (EDRs) CpG loci for Spiers *et al.*'s typically developing fetal brain, typically developing SVZ, and autism-diagnosed SVZ.

| Probe ID   | Spiers Fetal 23-76dpc | Spiers Fetal 77-89 dpc | Spiers Fetal 90-108 dpc | Spiers Fetal 109-184 dpc | Young Control SVZ | Young Autism SVZ | Middle Control SVZ | Middle Autism SVZ | Old Control SVZ | Old Autism SVZ |
|------------|-----------------------|------------------------|-------------------------|--------------------------|-------------------|------------------|--------------------|-------------------|-----------------|----------------|
| cg00194126 | 0.20                  | 0.17                   | 0.30                    | 0.45                     | 0.48              | 0.41             | 0.66               | 0.53              | 0.68            | 0.57           |
| cg00627029 | 0.19                  | 0.20                   | 0.26                    | 0.30                     | 0.67              | 0.57             | 0.66               | 0.67              | 0.47            | 0.57           |
| cg00766289 | 0.35                  | 0.33                   | 0.38                    | 0.41                     | 0.61              | 0.50             | 0.58               | 0.46              | 0.53            | 0.49           |
| cg01074584 | 0.45                  | 0.43                   | 0.54                    | 0.67                     | 0.59              | 0.58             | 0.75               | 0.60              | 0.80            | 0.71           |
| cg01154445 | 0.32                  | 0.30                   | 0.41                    | 0.50                     | 0.62              | 0.59             | 0.76               | 0.63              | 0.77            | 0.66           |
| cg01270206 | 0.54                  | 0.53                   | 0.59                    | 0.66                     | 0.68              | 0.66             | 0.78               | 0.68              | 0.79            | 0.68           |
| cg01411921 | 0.22                  | 0.21                   | 0.26                    | 0.33                     | 0.53              | 0.52             | 0.69               | 0.57              | 0.76            | 0.71           |
| cg01419914 | 0.37                  | 0.36                   | 0.48                    | 0.61                     | 0.68              | 0.62             | 0.79               | 0.68              | 0.78            | 0.73           |
| cg01692639 | 0.34                  | 0.34                   | 0.41                    | 0.46                     | 0.47              | 0.43             | 0.59               | 0.49              | 0.59            | 0.54           |
| cg01944288 | 0.40                  | 0.39                   | 0.49                    | 0.58                     | 0.51              | 0.43             | 0.63               | 0.52              | 0.61            | 0.55           |
| cg02126031 | 0.21                  | 0.19                   | 0.23                    | 0.31                     | 0.59              | 0.54             | 0.68               | 0.57              | 0.71            | 0.60           |
| cg02362978 | 0.34                  | 0.35                   | 0.40                    | 0.43                     | 0.44              | 0.52             | 0.36               | 0.38              | 0.36            | 0.46           |
| cg02372786 | 0.18                  | 0.18                   | 0.19                    | 0.22                     | 0.58              | 0.46             | 0.69               | 0.67              | 0.70            | 0.64           |
| cg02386604 | 0.61                  | 0.60                   | 0.64                    | 0.68                     | 0.68              | 0.60             | 0.80               | 0.68              | 0.80            | 0.75           |
| cg02387803 | 0.40                  | 0.34                   | 0.50                    | 0.63                     | 0.62              | 0.48             | 0.67               | 0.55              | 0.71            | 0.64           |
| cg02390329 | 0.58                  | 0.55                   | 0.66                    | 0.71                     | 0.71              | 0.67             | 0.87               | 0.77              | 0.89            | 0.87           |
| cg02408252 | 0.23                  | 0.25                   | 0.28                    | 0.30                     | 0.43              | 0.44             | 0.39               | 0.47              | 0.39            | 0.50           |
| cg02821342 | 0.63                  | 0.61                   | 0.70                    | 0.77                     | 0.44              | 0.44             | 0.40               | 0.29              | 0.33            | 0.27           |
| cg02863169 | 0.46                  | 0.48                   | 0.60                    | 0.68                     | 0.75              | 0.61             | 0.86               | 0.81              | 0.87            | 0.80           |
| cg02909446 | 0.28                  | 0.27                   | 0.38                    | 0.44                     | 0.61              | 0.60             | 0.71               | 0.59              | 0.73            | 0.69           |
| cg03599357 | 0.12                  | 0.11                   | 0.13                    | 0.21                     | 0.42              | 0.34             | 0.54               | 0.40              | 0.57            | 0.47           |
| cg04138492 | 0.30                  | 0.29                   | 0.41                    | 0.52                     | 0.59              | 0.58             | 0.71               | 0.61              | 0.70            | 0.61           |
| cg04541368 | 0.37                  | 0.35                   | 0.47                    | 0.55                     | 0.74              | 0.62             | 0.86               | 0.73              | 0.89            | 0.84           |
| cg04595505 | 0.47                  | 0.47                   | 0.53                    | 0.58                     | 0.63              | 0.61             | 0.75               | 0.65              | 0.73            | 0.69           |
| cg04607865 | 0.18                  | 0.17                   | 0.24                    | 0.27                     | 0.28              | 0.14             | 0.36               | 0.24              | 0.47            | 0.21           |
| cg04751149 | 0.21                  | 0.22                   | 0.27                    | 0.28                     | 0.48              | 0.42             | 0.59               | 0.48              | 0.60            | 0.53           |
| cg04797742 | 0.50                  | 0.50                   | 0.60                    | 0.69                     | 0.73              | 0.61             | 0.82               | 0.79              | 0.83            | 0.76           |
| cg05049335 | 0.36                  | 0.35                   | 0.28                    | 0.23                     | 0.23              | 0.24             | 0.29               | 0.19              | 0.23            | 0.16           |
| cg06202276 | 0.22                  | 0.21                   | 0.25                    | 0.30                     | 0.44              | 0.34             | 0.44               | 0.41              | 0.48            | 0.42           |
| cg06814287 | 0.36                  | 0.36                   | 0.39                    | 0.42                     | 0.40              | 0.36             | 0.44               | 0.32              | 0.43            | 0.39           |
| cg07099161 | 0.23                  | 0.21                   | 0.34                    | 0.45                     | 0.50              | 0.43             | 0.56               | 0.44              | 0.58            | 0.49           |
| cg07687131 | 0.23                  | 0.20                   | 0.24                    | 0.29                     | 0.56              | 0.37             | 0.62               | 0.51              | 0.64            | 0.58           |
| cg07833262 | 0.20                  | 0.20                   | 0.26                    | 0.36                     | 0.51              | 0.49             | 0.59               | 0.48              | 0.65            | 0.56           |
| cg07835051 | 0.25                  | 0.23                   | 0.35                    | 0.48                     | 0.52              | 0.45             | 0.56               | 0.44              | 0.62            | 0.51           |
| cg08006625 | 0.30                  | 0.30                   | 0.36                    | 0.43                     | 0.54              | 0.50             | 0.66               | 0.54              | 0.64            | 0.58           |
| cg08239858 | 0.43                  | 0.43                   | 0.32                    | 0.24                     | 0.17              | 0.24             | 0.21               | 0.32              | 0.15            | 0.26           |
| cg08297393 | 0.55                  | 0.55                   | 0.51                    | 0.43                     | 0.46              | 0.53             | 0.36               | 0.40              | 0.32            | 0.45           |
| cg08972081 | 0.39                  | 0.41                   | 0.42                    | 0.53                     | 0.57              | 0.50             | 0.68               | 0.57              | 0.66            | 0.57           |
| cg09012594 | 0.50                  | 0.52                   | 0.64                    | 0.75                     | 0.66              | 0.63             | 0.78               | 0.67              | 0.76            | 0.70           |
| cg09577511 | 0.33                  | 0.32                   | 0.35                    | 0.38                     | 0.43              | 0.32             | 0.45               | 0.43              | 0.50            | 0.41           |
| cg09593860 | 0.55                  | 0.51                   | 0.70                    | 0.76                     | 0.77              | 0.68             | 0.87               | 0.77              | 0.79            | 0.74           |
| cg09626521 | 0.45                  | 0.44                   | 0.56                    | 0.66                     | 0.67              | 0.65             | 0.76               | 0.62              | 0.78            | 0.70           |

|            |      |      |      |      |      |      |      |      |      |      |
|------------|------|------|------|------|------|------|------|------|------|------|
| cg09867667 | 0.25 | 0.23 | 0.28 | 0.34 | 0.45 | 0.42 | 0.56 | 0.45 | 0.53 | 0.53 |
| cg09904497 | 0.13 | 0.13 | 0.14 | 0.19 | 0.39 | 0.35 | 0.50 | 0.39 | 0.50 | 0.44 |
| cg09941208 | 0.48 | 0.47 | 0.49 | 0.56 | 0.76 | 0.63 | 0.85 | 0.77 | 0.86 | 0.80 |
| cg09958560 | 0.55 | 0.54 | 0.42 | 0.34 | 0.75 | 0.62 | 0.87 | 0.79 | 0.85 | 0.84 |
| cg09990962 | 0.22 | 0.22 | 0.27 | 0.33 | 0.58 | 0.55 | 0.73 | 0.62 | 0.74 | 0.68 |
| cg10201167 | 0.38 | 0.39 | 0.48 | 0.58 | 0.49 | 0.46 | 0.64 | 0.52 | 0.64 | 0.58 |
| cg10285466 | 0.51 | 0.50 | 0.59 | 0.66 | 0.58 | 0.58 | 0.72 | 0.61 | 0.71 | 0.67 |
| cg10464312 | 0.30 | 0.30 | 0.40 | 0.42 | 0.58 | 0.53 | 0.68 | 0.55 | 0.67 | 0.62 |
| cg10502244 | 0.38 | 0.39 | 0.45 | 0.47 | 0.40 | 0.41 | 0.36 | 0.44 | 0.31 | 0.42 |
| cg10873171 | 0.60 | 0.59 | 0.53 | 0.43 | 0.59 | 0.46 | 0.69 | 0.61 | 0.68 | 0.62 |
| cg10927841 | 0.08 | 0.08 | 0.13 | 0.17 | 0.24 | 0.13 | 0.25 | 0.22 | 0.34 | 0.26 |
| cg10941185 | 0.73 | 0.72 | 0.66 | 0.60 | 0.68 | 0.70 | 0.78 | 0.68 | 0.78 | 0.72 |
| cg10997479 | 0.23 | 0.22 | 0.36 | 0.50 | 0.50 | 0.44 | 0.56 | 0.46 | 0.60 | 0.49 |
| cg11612799 | 0.52 | 0.50 | 0.57 | 0.65 | 0.69 | 0.62 | 0.75 | 0.60 | 0.80 | 0.62 |
| cg11692124 | 0.23 | 0.24 | 0.25 | 0.27 | 0.56 | 0.40 | 0.73 | 0.58 | 0.75 | 0.70 |
| cg12290311 | 0.55 | 0.51 | 0.58 | 0.65 | 0.61 | 0.51 | 0.75 | 0.63 | 0.79 | 0.75 |
| cg12298745 | 0.25 | 0.25 | 0.29 | 0.42 | 0.62 | 0.55 | 0.75 | 0.58 | 0.75 | 0.68 |
| cg12427163 | 0.34 | 0.36 | 0.34 | 0.28 | 0.43 | 0.46 | 0.31 | 0.42 | 0.25 | 0.36 |
| cg12572278 | 0.18 | 0.19 | 0.14 | 0.13 | 0.44 | 0.29 | 0.36 | 0.33 | 0.29 | 0.30 |
| cg12605662 | 0.28 | 0.26 | 0.43 | 0.61 | 0.62 | 0.48 | 0.61 | 0.42 | 0.70 | 0.56 |
| cg12732998 | 0.26 | 0.24 | 0.33 | 0.40 | 0.51 | 0.48 | 0.66 | 0.56 | 0.70 | 0.66 |
| cg13113525 | 0.12 | 0.11 | 0.18 | 0.25 | 0.38 | 0.32 | 0.48 | 0.38 | 0.43 | 0.39 |
| cg13409439 | 0.53 | 0.56 | 0.50 | 0.45 | 0.57 | 0.50 | 0.61 | 0.47 | 0.54 | 0.54 |
| cg13474918 | 0.78 | 0.78 | 0.81 | 0.83 | 0.77 | 0.76 | 0.82 | 0.71 | 0.84 | 0.79 |
| cg13558371 | 0.49 | 0.50 | 0.57 | 0.63 | 0.56 | 0.51 | 0.61 | 0.51 | 0.63 | 0.60 |
| cg13867255 | 0.52 | 0.54 | 0.46 | 0.35 | 0.67 | 0.63 | 0.78 | 0.67 | 0.68 | 0.69 |
| cg14031365 | 0.41 | 0.39 | 0.47 | 0.59 | 0.52 | 0.36 | 0.62 | 0.49 | 0.72 | 0.50 |
| cg14179581 | 0.17 | 0.16 | 0.19 | 0.23 | 0.36 | 0.26 | 0.38 | 0.27 | 0.45 | 0.28 |
| cg14475966 | 0.50 | 0.48 | 0.58 | 0.60 | 0.65 | 0.58 | 0.71 | 0.64 | 0.77 | 0.66 |
| cg14573411 | 0.37 | 0.35 | 0.49 | 0.54 | 0.52 | 0.41 | 0.55 | 0.41 | 0.61 | 0.51 |
| cg14811105 | 0.27 | 0.24 | 0.36 | 0.50 | 0.58 | 0.51 | 0.73 | 0.62 | 0.77 | 0.67 |
| cg15266508 | 0.08 | 0.07 | 0.11 | 0.13 | 0.35 | 0.24 | 0.41 | 0.38 | 0.39 | 0.39 |
| cg15329642 | 0.36 | 0.35 | 0.37 | 0.44 | 0.62 | 0.51 | 0.71 | 0.63 | 0.73 | 0.65 |
| cg15846434 | 0.19 | 0.18 | 0.24 | 0.30 | 0.48 | 0.39 | 0.63 | 0.51 | 0.59 | 0.54 |
| cg15922174 | 0.45 | 0.42 | 0.58 | 0.63 | 0.60 | 0.50 | 0.63 | 0.49 | 0.70 | 0.60 |
| cg16134191 | 0.18 | 0.18 | 0.21 | 0.29 | 0.43 | 0.40 | 0.57 | 0.45 | 0.60 | 0.51 |
| cg16327891 | 0.52 | 0.52 | 0.59 | 0.65 | 0.54 | 0.42 | 0.64 | 0.56 | 0.70 | 0.57 |
| cg16481280 | 0.26 | 0.25 | 0.29 | 0.37 | 0.39 | 0.35 | 0.43 | 0.29 | 0.40 | 0.36 |
| cg17178291 | 0.42 | 0.42 | 0.35 | 0.30 | 0.35 | 0.29 | 0.31 | 0.36 | 0.25 | 0.38 |
| cg17259358 | 0.30 | 0.28 | 0.38 | 0.41 | 0.39 | 0.35 | 0.54 | 0.44 | 0.52 | 0.45 |
| cg17301216 | 0.44 | 0.46 | 0.37 | 0.29 | 0.55 | 0.50 | 0.68 | 0.56 | 0.72 | 0.62 |
| cg17310258 | 0.28 | 0.29 | 0.31 | 0.40 | 0.58 | 0.53 | 0.72 | 0.61 | 0.77 | 0.67 |
| cg18403361 | 0.39 | 0.39 | 0.52 | 0.62 | 0.65 | 0.64 | 0.82 | 0.71 | 0.80 | 0.77 |
| cg18653451 | 0.26 | 0.26 | 0.23 | 0.18 | 0.38 | 0.27 | 0.39 | 0.37 | 0.41 | 0.37 |
| cg19630681 | 0.43 | 0.45 | 0.51 | 0.58 | 0.58 | 0.51 | 0.60 | 0.56 | 0.62 | 0.50 |
| cg20124078 | 0.28 | 0.29 | 0.33 | 0.36 | 0.49 | 0.42 | 0.60 | 0.49 | 0.63 | 0.52 |
| cg20647118 | 0.19 | 0.21 | 0.22 | 0.24 | 0.44 | 0.39 | 0.52 | 0.42 | 0.52 | 0.45 |
| cg21639713 | 0.38 | 0.37 | 0.49 | 0.58 | 0.60 | 0.58 | 0.74 | 0.64 | 0.73 | 0.70 |

|            |      |      |      |      |      |      |      |      |      |      |
|------------|------|------|------|------|------|------|------|------|------|------|
| cg22360016 | 0.32 | 0.31 | 0.44 | 0.45 | 0.61 | 0.61 | 0.71 | 0.60 | 0.70 | 0.65 |
| cg23058037 | 0.19 | 0.18 | 0.27 | 0.35 | 0.44 | 0.33 | 0.44 | 0.40 | 0.48 | 0.42 |
| cg23662142 | 0.40 | 0.37 | 0.53 | 0.65 | 0.74 | 0.70 | 0.82 | 0.76 | 0.87 | 0.75 |
| cg23981172 | 0.54 | 0.51 | 0.57 | 0.64 | 0.55 | 0.65 | 0.64 | 0.62 | 0.64 | 0.63 |
| cg24025550 | 0.25 | 0.27 | 0.29 | 0.32 | 0.30 | 0.18 | 0.29 | 0.22 | 0.38 | 0.28 |
| cg24036116 | 0.50 | 0.53 | 0.46 | 0.40 | 0.32 | 0.31 | 0.41 | 0.30 | 0.34 | 0.32 |
| cg24684807 | 0.39 | 0.38 | 0.48 | 0.54 | 0.49 | 0.43 | 0.63 | 0.52 | 0.63 | 0.58 |
| cg25152404 | 0.51 | 0.51 | 0.56 | 0.60 | 0.73 | 0.67 | 0.82 | 0.71 | 0.82 | 0.78 |
| cg25615184 | 0.34 | 0.35 | 0.42 | 0.50 | 0.44 | 0.33 | 0.47 | 0.43 | 0.53 | 0.41 |
| cg25741487 | 0.23 | 0.20 | 0.38 | 0.59 | 0.51 | 0.36 | 0.60 | 0.44 | 0.71 | 0.50 |
| cg25751787 | 0.19 | 0.18 | 0.24 | 0.34 | 0.50 | 0.47 | 0.64 | 0.54 | 0.65 | 0.58 |
| cg25900085 | 0.24 | 0.24 | 0.33 | 0.41 | 0.53 | 0.48 | 0.77 | 0.64 | 0.80 | 0.69 |
| cg26052586 | 0.52 | 0.51 | 0.61 | 0.65 | 0.70 | 0.63 | 0.76 | 0.65 | 0.76 | 0.69 |
| cg26150922 | 0.72 | 0.73 | 0.68 | 0.63 | 0.68 | 0.76 | 0.68 | 0.68 | 0.62 | 0.73 |
| cg26218110 | 0.24 | 0.22 | 0.34 | 0.42 | 0.60 | 0.57 | 0.74 | 0.63 | 0.74 | 0.68 |
| cg27552679 | 0.13 | 0.14 | 0.21 | 0.27 | 0.40 | 0.30 | 0.40 | 0.34 | 0.35 | 0.34 |

**Table S9.** Total number of sequenced reads (M, million) from Illumina RNA-Seq libraries aligned to the hg19 assembly of the human genome.

| <b>Sequencer</b> | <b>Sample ID</b> | <b>RIN</b> | <b>Library</b> | <b>Sample Type</b>      | <b>Mapped Reads<br/>to Human<br/>Genome (hg19)</b> |
|------------------|------------------|------------|----------------|-------------------------|----------------------------------------------------|
| Illumina         | AN08873          | 7.6        | RNA-Seq        | Autism Human Brain SVZ  | 46 M                                               |
| Illumina         | UMB1349          | 7.0        | RNA-Seq        | Autism Human Brain SVZ  | 38 M                                               |
| Illumina         | UMB4849          | 7.3        | RNA-Seq        | Autism Human Brain SVZ  | 38 M                                               |
| Illumina         | UMB4231          | 7.8        | RNA-Seq        | Autism Human Brain SVZ  | 37 M                                               |
| Illumina         | UMB4721          | 7.3        | RNA-Seq        | Autism Human Brain SVZ  | 44 M                                               |
| Illumina         | UMB5408          | 7.0        | RNA-Seq        | Control Human Brain SVZ | 87 M                                               |
| Illumina         | UMB1674          | 7.4        | RNA-Seq        | Control Human Brain SVZ | 38 M                                               |
| Illumina         | UMB4337          | 7.3        | RNA-Seq        | Control Human Brain SVZ | 36 M                                               |



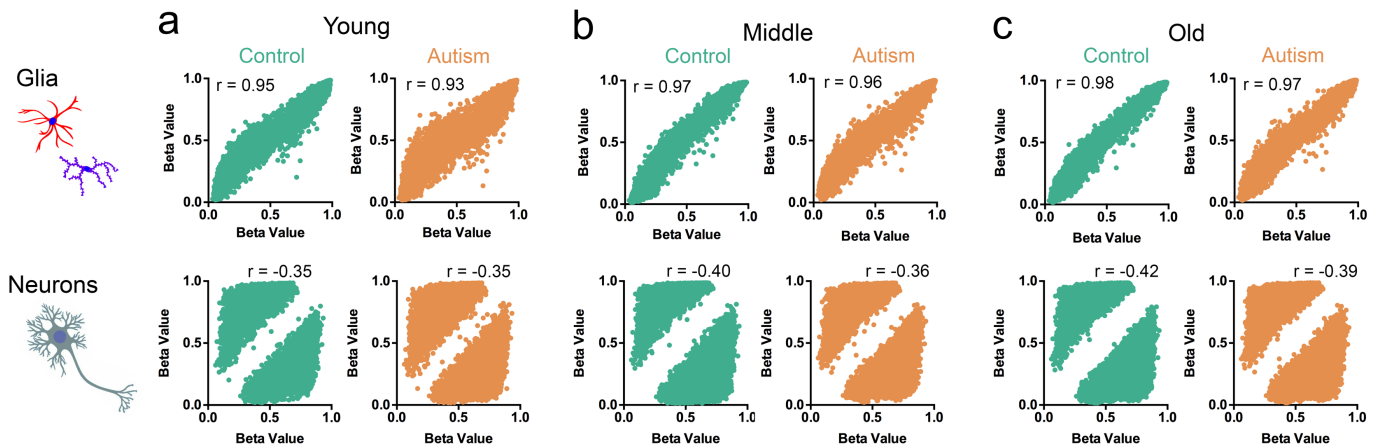

**Figure S1.** Validation of glia cell composition of SVZ using cell type specific reference DNA methylation datasets for FACS-sorted glia and neurons derived from postmortem human brain tissue. The Cell EpigenoType Specific (CETS) mapper R package was used to acquire the mean beta values of 10,000 most differentially methylated loci between FACS-sorted neurons and glia from postmortem human brain control tissue samples. We found a highly significant association between the glia-specific methylation profiles and that of SVZ specimens of all autism-diagnosed and typically developing individuals. (a) The relationship between glia and neuron-specific methylation markers (y-axis) and young control and autism postmortem brain tissue specimens (x-axis) (b) The relationship between glia and neuron-specific methylation markers (y-axis) and middle control and autism postmortem brain tissue specimens (x-axis) (c) The relationship between glia and neuron-specific methylation markers (y-axis) and old control and autism postmortem brain tissue specimens (x-axis)

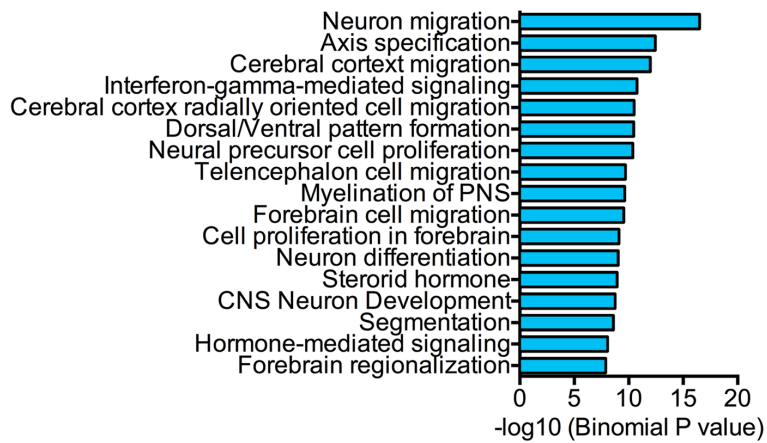

**Figure S2.** Functional annotation of genes containing differentially methylated loci in autism by database GREAT. Enrichment in gene ontology biological process category shown for all autism-associated DML.

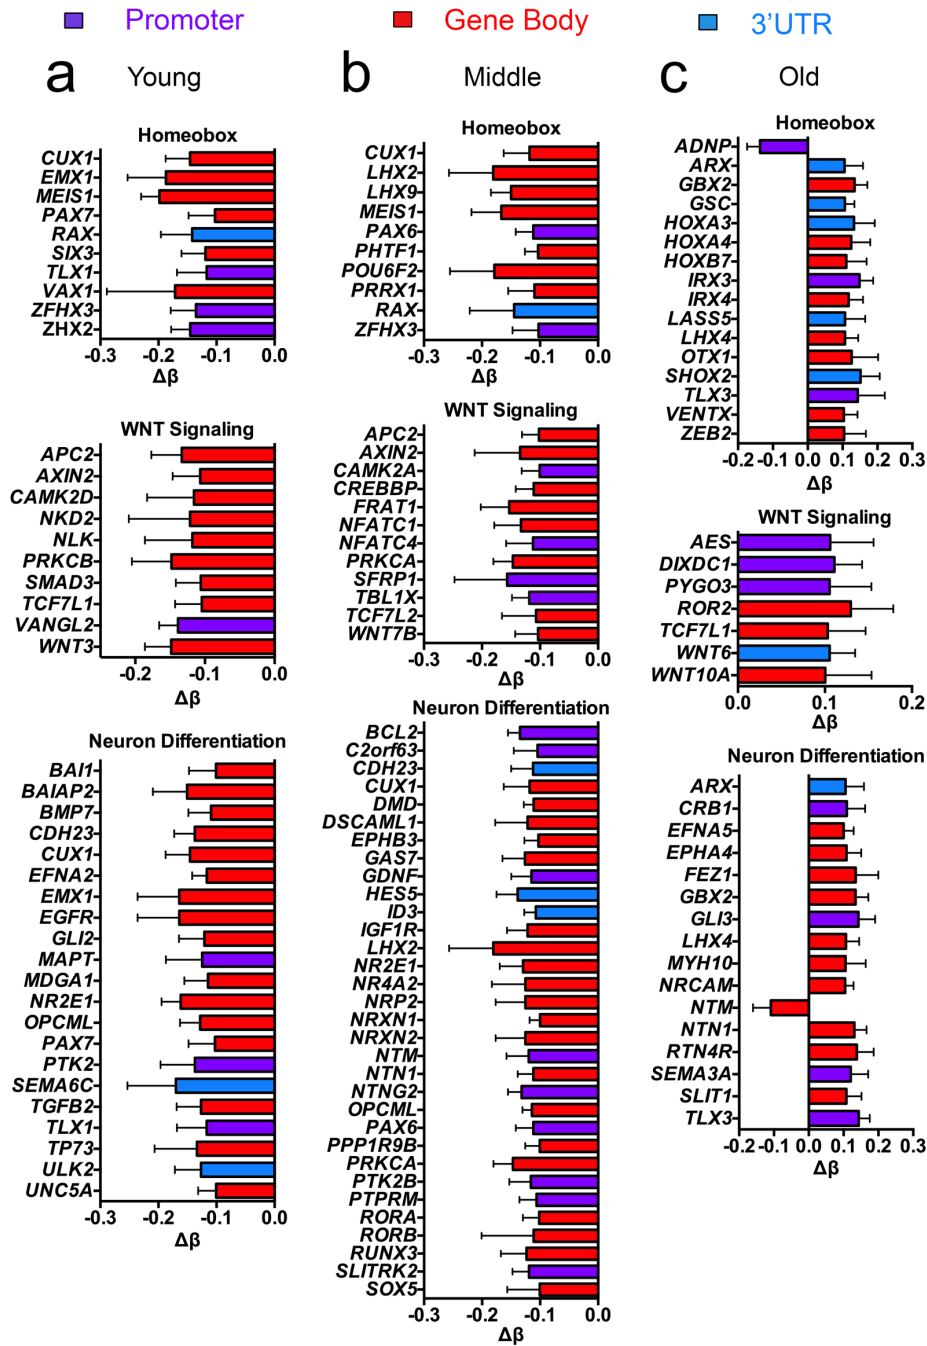

**Figure S3.** Autism-associated differentially methylated loci (DML) for young, middle, and old age groups at homeobox, WNT signaling, and neuron differentiation genes. DML at promoter (purple), gene body (red), and 3'UTR (blue) regions are presented as the average beta delta difference between autism and typically developing cases.

## a GO: Biological Process

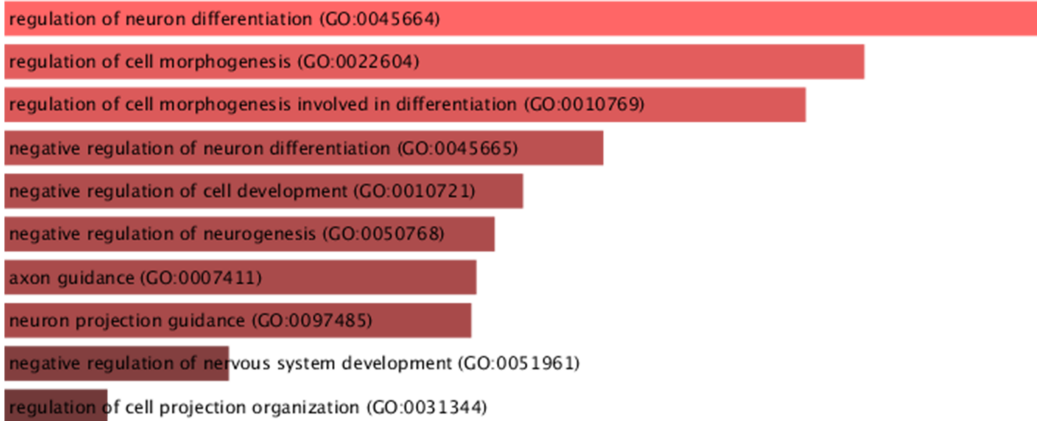

## b GO: Cellular Component

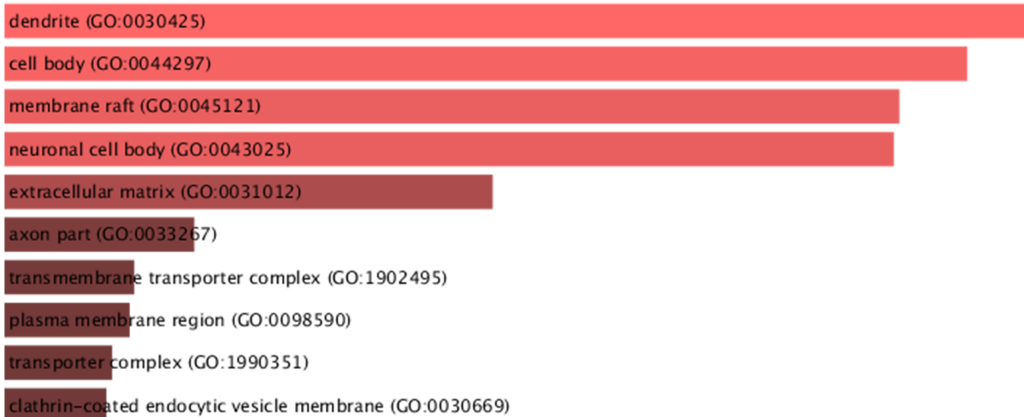

## c GO: Molecular Function

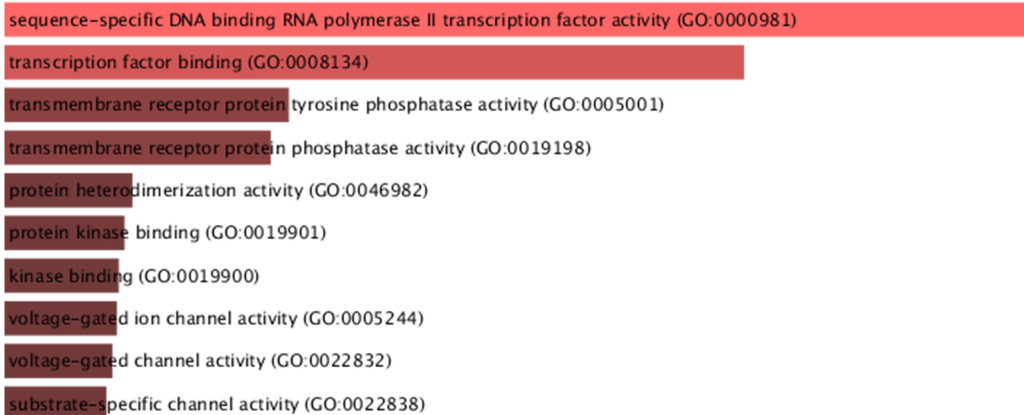

**Figure S4.** Enrichr online gene list enrichment analysis of autism-associated differentially methylated loci related genes. Enrichment graph of gene ontology (GO) categories a.) biological process, b.) cellular component, and c.) molecular function. Bar graph shows top 10 ranked GO terms sorted by combined score. Combined score calculated using the log of the P-value from the Fisher exact test multiplied by the Z-score of the deviation from the expected rank.

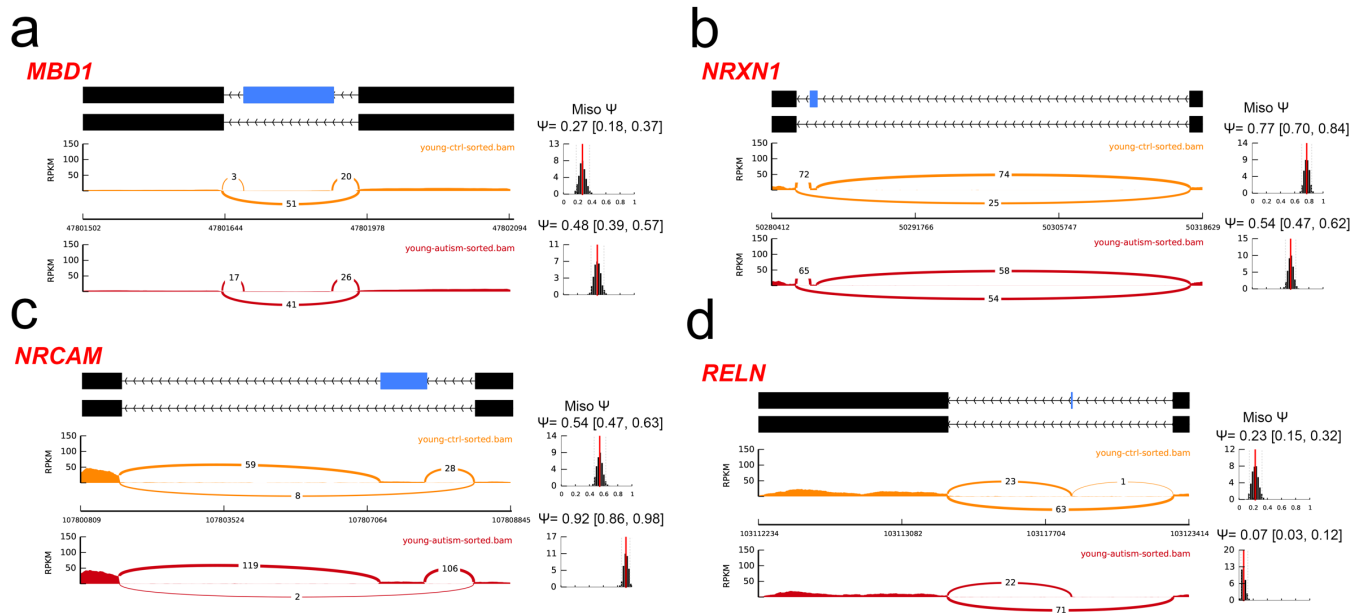

**Figure S5.** Sashimi plots of aberrantly alternatively spliced exons in autism. Sashimi plot generated by MISO analysis of RNA-Seq data measured as RPKM in control (orange) and autism (red) illustrates the number of exon-exon junction reads as indicated to infer isoform expression. The right graphs show the MISO calculated distribution of a percent exon inclusion score (Psi-value; 95% confidence intervals in brackets) for the (a) *MBD1*, (b) *NRXN1*, (c) *NRCAM*, (d) *RELN* ASEs from control (top) and autism (bottom) RNA-Seq data.
