# Supplementary material for: Epigenetic Delay in the Neurodevelopmental Trajectory of DNA Methylation States in Autism Spectrum Disorders
Source: Front Genet. 2019 Oct 1;10:907. doi: 10.3389/fgene.2019.00907 (PMC6797928; doi:10.3389/fgene.2019.00907)
Supplement: Supplementary file 1 [file DataSheet_1.xlsx]

## Sheet: Young DML
ID	Chromosome	Start	End	Strand	pperm_young[which(pperm_young <= 0.05)]	X9296931030_R01C01	X9296931030_R02C01	X9296931030_R04C01	X9296931030_R06C01	X9296931030_R04C02		X9296931030_R03C01	X9296931030_R05C01	X9296931030_R01C02	X9296931030_R02C02	X9296931030_R03C02		Delta Beta
cg00022997	chr6	31650808	31650809	+	0.027	0.33413	0.2248	0.207956	0.108763	0.324453	0.24002	0.356541	0.457655	0.395851	0.391502	0.247729	0.369856	-0.129835
cg00025439	chr16	87856450	87856451	-	0.029	0.817531	0.581479	0.729274	0.223761	0.581392	0.586687	0.764883	0.677154	0.860482	0.778046	0.840797	0.784272	-0.197585
cg00035864	chrY	8553009	8553010	+	0.001	0.243705	0.21487	0.217604	0.204831	0.154505	0.207103	0.303218	0.278055	0.461063	0.247903	0.338734	0.325795	-0.118691
cg00066748	chr8	496527	496528	+	0.03	0.79119	0.564587	0.79655	0.702494	0.694177	0.7098	0.817571	0.84486	0.88544	0.853122	0.731993	0.826597	-0.116798
cg00081417	chr6	140400137	140400138	-	0.046	0.64412	0.533489	0.716303	0.349205	0.644779	0.577579	0.654784	0.648533	0.804363	0.655133	0.736037	0.69977	-0.122191
cg00225603	chr7	20865639	20865640	+	0.02	0.263198	0.41125	0.671983	0.451203	0.352916	0.43011	0.628591	0.612259	0.836514	0.662291	0.587733	0.665477	-0.235367
cg00246969	chr13	99159656	99159657	+	0.041	0.495664	0.398868	0.572024	0.272043	0.428566	0.433433	0.562464	0.551879	0.696802	0.568116	0.450704	0.565993	-0.13256
cg00317879	chr11	68920611	68920612	+	0.031	0.706125	0.628534	0.81204	0.519396	0.683042	0.669827	0.714327	0.750238	0.893785	0.825976	0.795974	0.79606	-0.126233
cg00415665	chr8	123875036	123875037	-	0.003	0.64794	0.560264	0.6594	0.529194	0.617256	0.602811	0.686518	0.704675	0.816909	0.774323	0.758226	0.74813	-0.145319
cg00474889	chr11	5711068	5711069	-	0.002	0.308289	0.154056	0.284111	0.14229	0.16373	0.210495	0.421215	0.346488	0.356876	0.289123	0.348862	0.352513	-0.142018
cg00502035	chr10	125751386	125751387	-	0.044	0.401096	0.265345	0.165457	0.229193	0.256259	0.26347	0.401769	0.386999	0.241988	0.399906	0.501107	0.386354	-0.122884
cg00516067	chr20	61447530	61447531	+	0.023	0.593304	0.428925	0.575177	0.333593	0.516276	0.489455	0.575555	0.611934	0.742411	0.613853	0.560656	0.620882	-0.131427
cg00528572	chr11	92703433	92703434	+	0.014	0.362285	0.436942	0.416879	0.139696	0.33077	0.337314	0.407061	0.427834	0.482166	0.466553	0.494402	0.455603	-0.118289
cg00538147	chr10	125751609	125751610	+	0.008	0.405609	0.197923	0.244243	0.146463	0.103199	0.219487	0.394968	0.404721	0.320445	0.412889	0.439447	0.394494	-0.175007
cg00538458	chr16	22959868	22959869	+	0.014	0.35772	0.263056	0.349473	0.201629	0.202465	0.274869	0.433343	0.36382	0.375146	0.335759	0.519135	0.405441	-0.130572
cg00590260	chr10	530805	530806	+	0.02	0.215425	0.360554	0.359931	0.198225	0.306315	0.28809	0.354418	0.358903	0.464828	0.419044	0.44192	0.407823	-0.119732
cg00599812	chr1	1385047	1385048	-	0.034	0.566424	0.805684	0.833023	0.609234	0.708203	0.704514	0.839089	0.822089	0.845185	0.787611	0.860107	0.830816	-0.126302
cg00607058	chr22	31090071	31090072	-	0.05	0.147573	0.588961	0.0926661	0.118996	0.108724	0.211384	0.581549	0.426848	0.615061	0.451302	0.203114	0.455575	-0.24419
cg00607989	chr5	137985183	137985184	-	0.033	0.39704	0.48483	0.524389	0.518775	0.487102	0.482427	0.610856	0.600543	0.7256	0.621806	0.412213	0.594204	-0.111777
cg00627029	chr17	72322791	72322792	+	0.003	0.644099	0.593482	0.617869	0.389841	0.613612	0.571781	0.652138	0.651638	0.756268	0.681919	0.619713	0.672335	-0.100554
cg00628697	chr21	38630342	38630343	+	0.022	0.101641	0.147384	0.163677	0.0360595	0.0562341	0.100999	0.237809	0.172619	0.194488	0.137711	0.34486	0.217497	-0.116498
cg00647658	chr16	54227814	54227815	-	0.014	0.161128	0.101753	0.267476	0.127689	0.154018	0.162413	0.235001	0.235909	0.282534	0.225798	0.347126	0.265274	-0.102861
cg00695416	chr21	37442476	37442477	-	0.007	0.0639802	0.0634398	0.062625	0.0726443	0.0863046	0.0697988	0.118356	0.210784	0.376578	0.223388	0.0816483	0.202151	-0.132352
cg00706697	chr16	863475	863476	+	0.016	0.0246857	0.116893	0.206413	0.0276671	0.0470066	0.0845332	0.288362	0.197495	0.1424	0.210481	0.127725	0.193293	-0.108759
cg00713939	chr8	144660590	144660591	-	0.049	0.182308	0.0638429	0.0606983	0.0562577	0.038393	0.0803	0.31523	0.168592	0.206821	0.220576	0.0360117	0.189446	-0.109146
cg00716257	chr14	75897417	75897418	-	0.035	0.483487	0.330164	0.592074	0.299505	0.43222	0.42749	0.53106	0.54254	0.576658	0.485165	0.607575	0.5486	-0.121109
cg00744351	chr17	4804374	4804375	-	0.01	0.605223	0.497075	0.577924	0.468702	0.446069	0.518999	0.584272	0.602726	0.725989	0.627452	0.602714	0.628631	-0.109632
cg00779858	chr3	167370529	167370530	+	0.004	0.346737	0.2659	0.304256	0.143991	0.277724	0.267722	0.414014	0.407521	0.311952	0.36587	0.390017	0.377875	-0.110153
cg00789671	chr3	195488493	195488494	-	0.017	0.365363	0.526006	0.448169	0.443515	0.381314	0.432874	0.571223	0.503692	0.632525	0.452645	0.553381	0.542693	-0.10982
cg00795205	chr16	23916466	23916467	-	0.02	0.768021	0.522057	0.682669	0.557997	0.609486	0.628046	0.748049	0.815286	0.844148	0.798219	0.674396	0.77602	-0.147974
cg00807871	chr6	37617124	37617125	+	0.023	0.114965	0.229522	0.259849	0.134151	0.209038	0.189505	0.270503	0.280481	0.476072	0.292925	0.201179	0.304232	-0.114727
cg00822998	chrX	53310810	53310811	+	0.029	0.607703	0.41548	0.559728	0.247712	0.542441	0.474613	0.587182	0.551145	0.637584	0.627492	0.593098	0.5993	-0.124688
cg00827210	chr8	1427491	1427492	+	0.023	0.523878	0.490036	0.589149	0.316986	0.543717	0.492753	0.557875	0.564119	0.693906	0.592158	0.560347	0.593681	-0.100928
cg00844404	chr3	183868973	183868974	+	0.043	0.638651	0.799999	0.723892	0.418505	0.686832	0.653576	0.734823	0.72895	0.764266	0.787411	0.810507	0.765191	-0.111615
cg00852921	chr20	62120544	62120545	-	0.021	0.595033	0.488109	0.563478	0.374978	0.49185	0.50269	0.581067	0.546853	0.591467	0.590934	0.723227	0.60671	-0.10402
cg00859129	chr1	109422184	109422185	-	0.036	0.424406	0.47232	0.588049	0.662553	0.535311	0.536528	0.560453	0.668169	0.743482	0.607995	0.722743	0.660568	-0.124041
cg00873050	chr1	32828016	32828017	-	0.031	0.0181378	0.0177888	0.0306717	0.0193672	0.0265831	0.0225097	0.0286131	0.029267	0.514518	0.0249836	0.0350726	0.126491	-0.103981
cg00893875	chr10	91597593	91597594	+	0.002	0.11732	0.135721	0.164075	0.0239641	0.0349841	0.0952129	0.221663	0.174988	0.295188	0.217046	0.330184	0.247814	-0.152601
cg00913283	chr7	4832340	4832341	-	0.014	0.480627	0.353567	0.471548	0.19788	0.321844	0.365093	0.473305	0.476302	0.563874	0.483112	0.532346	0.505788	-0.140695
cg00920139	chr8	22455473	22455474	-	0.032	0.479031	0.428491	0.584892	0.350535	0.44838	0.458266	0.537201	0.508644	0.676079	0.531288	0.572452	0.565133	-0.106867
cg00944631	chr22	20464947	20464948	+	0.014	0.141592	0.731848	0.814669	0.786234	0.730859	0.641041	0.769925	0.828413	0.857699	0.848182	0.85099	0.831042	-0.190001
cg00945507	chr7	54827677	54827678	+	0.002	0.298728	0.324896	0.279249	0.331805	0.311525	0.309241	0.461845	0.42686	0.36316	0.447382	0.48619	0.437088	-0.127847
cg00946992	chr14	29227969	29227970	+	0.035	0.132018	0.143905	0.275643	0.203791	0.140281	0.179127	0.313342	0.327601	0.409191	0.301018	0.131546	0.29654	-0.117412
cg00970279	chr6	31797416	31797417	+	0.043	0.0934484	0.125783	0.139122	0.112579	0.114918	0.11717	0.395924	0.263459	0.0913249	0.30427	0.139337	0.238863	-0.121693
cg00974579	chr16	88990188	88990189	-	0.021	0.870098	0.45011	0.824157	0.799797	0.847577	0.758348	0.879363	0.836094	0.885309	0.842708	0.889105	0.866516	-0.108168
cg00975163	chr14	19647166	19647167	+	0.016	0.409979	0.51426	0.797233	0.471581	0.472872	0.533185	0.775977	0.802056	0.790773	0.772357	0.841887	0.79661	-0.263425
cg01050010	chr17	31149877	31149878	+	0.038	0.619963	0.380861	0.164874	0.131845	0.122967	0.284102	0.527742	0.437663	0.322896	0.491724	0.560794	0.468164	-0.184062
cg01054140	chr2	240736286	240736287	-	0.027	0.716633	0.538336	0.656753	0.471727	0.552177	0.587125	0.692153	0.694852	0.753576	0.696	0.667353	0.700787	-0.113661
cg01058584	chr1	175013154	175013155	+	0.037	0.632894	0.623928	0.839899	0.670251	0.605712	0.674537	0.766513	0.738977	0.872	0.765213	0.811081	0.790757	-0.11622
cg01066220	chr6	31696240	31696241	+	0.005	0.688675	0.687578	0.738036	0.537998	0.683198	0.667097	0.807177	0.765643	0.772025	0.779751	0.716763	0.768272	-0.101175
cg01089914	chr2	218843229	218843230	+	0.025	0.72551	0.516341	0.621276	0.385221	0.505544	0.550778	0.688159	0.736438	0.766936	0.749279	0.60759	0.70968	-0.158902
cg01097897	chr12	63097264	63097265	-	0.018	0.61882	0.543586	0.615534	0.445995	0.611788	0.567144	0.676018	0.684019	0.732513	0.663281	0.602357	0.671638	-0.104493
cg01184784	chr2	8823756	8823757	-	0.041	0.234223	0.182894	0.421379	0.126667	0.266902	0.246413	0.330991	0.353218	0.463434	0.345312	0.333629	0.365317	-0.118904
cg01227136	chrX	3734578	3734579	+	0.002	0.0901256	0.110839	0.115316	0.123047	0.118434	0.111552	0.270594	0.401144	0.168586	0.416081	0.152825	0.281846	-0.170294
cg01234517	chr7	150021553	150021554	+	0.022	0.920714	0.737514	0.782855	0.641249	0.762005	0.768867	0.86746	0.857906	0.898867	0.889694	0.866276	0.876041	-0.107173
cg01281040	chr5	6349545	6349546	-	0.037	0.687215	0.682201	0.908347	0.600943	0.722041	0.720149	0.867172	0.739291	0.902658	0.815546	0.947881	0.85451	-0.13436
cg01295782	chr3	71739283	71739284	-	0.022	0.730394	0.635441	0.644472	0.780669	0.755766	0.709348	0.904049	0.874449	0.895719	0.904889	0.715048	0.858831	-0.149482
cg01308913	chrX	25040907	25040908	-	0.008	0.472178	0.470945	0.580645	0.441349	0.450362	0.483096	0.598119	0.591485	0.732947	0.607403	0.478808	0.601753	-0.118657
cg01330060	chr19	47960809	47960810	+	0.028	0.368112	0.334069	0.479353	0.331592	0.363166	0.375258	0.499419	0.518283	0.554234	0.506028	0.343094	0.484212	-0.108953
cg01369479	chr2	134532341	134532342	-	0.034	0.457507	0.381333	0.576378	0.563652	0.497992	0.495372	0.571314	0.573398	0.619665	0.55991	0.71656	0.608169	-0.112797
cg01398859	chrX	25040609	25040610	+	0.026	0.245168	0.237188	0.282006	0.184274	0.191357	0.227999	0.417826	0.342877	0.719892	0.304237	0.20722	0.39841	-0.170412
cg01400685	chr11	61598025	61598026	-	0.023	0.579147	0.4869	0.686082	0.459823	0.544062	0.551203	0.675521	0.633833	0.688447	0.657423	0.68382	0.667809	-0.116606
cg01405445	chr19	36246406	36246407	-	0	0.408256	0.428823	0.459982	0.347924	0.412759	0.411549	0.522605	0.508742	0.524117	0.559968	0.462548	0.515596	-0.104047
cg01443922	chr10	21803711	21803712	+	0.017	0.720598	0.631893	0.746469	0.495849	0.666004	0.652163	0.720075	0.804906	0.827865	0.760368	0.741698	0.770983	-0.11882
cg01465824	chr6	1930446	1930447	-	0.018	0.76565	0.568577	0.719052	0.616907	0.599958	0.654029	0.755342	0.751486	0.754273	0.729181	0.790856	0.756228	-0.102199
cg01473187	chrX	99891162	99891163	-	0.004	0.592497	0.50108	0.631464	0.538601	0.539365	0.560601	0.662662	0.648446	0.731409	0.651669	0.636036	0.666044	-0.105443
cg01477319	chr6	107531017	107531018	+	0.024	0.506587	0.445423	0.604184	0.41982	0.476813	0.490565	0.589518	0.551834	0.552816	0.54903	0.713029	0.591245	-0.10068
cg01485177	chr10	42863594	42863595	+	0.023	0.153545	0.183299	0.143107	0.139121	0.13616	0.151046	0.313488	0.290686	0.0774364	0.252967	0.40821	0.268558	-0.117511
cg01494348	chr8	144660395	144660396	+	0.047	0.247507	0.0758025	0.078754	0.128042	0.0938517	0.124791	0.290357	0.26511	0.261707	0.235398	0.0932008	0.229154	-0.104363
cg01494399	chr16	81709890	81709891	+	0.05	0.704873	0.579517	0.758279	0.559682	0.600805	0.640631	0.679551	0.706575	0.803626	0.74001	0.783166	0.742586	-0.101954
cg01550348	chr1	85809159	85809160	+	0.004	0.668681	0.631613	0.729957	0.619357	0.69778	0.669478	0.766383	0.810492	0.800496	0.799543	0.812699	0.797923	-0.128445
cg01570182	chr17	44337453	44337454	-	0.004	0.217872	0.171014	0.237495	0.21924	0.233293	0.215783	0.412405	0.335811	0.35915	0.369956	0.289304	0.353325	-0.137543
cg01574589	chr5	135532197	135532198	-	0.005	0.689732	0.608444	0.733416	0.56552	0.700292	0.659481	0.713587	0.732274	0.827854	0.744796	0.790707	0.761844	-0.102363
cg01581024	chr8	142009794	142009795	-	0.018	0.407152	0.53328	0.602587	0.458053	0.517907	0.503796	0.647816	0.530017	0.587813	0.626739	0.664544	0.611386	-0.10759
cg01613010	chr7	20835627	20835628	-	0.022	0.286848	0.518365	0.773846	0.45859	0.325362	0.472602	0.723288	0.680085	0.888803	0.689401	0.618645	0.720045	-0.247442
cg01616529	chr11	638424	638425	+	0.006	0.243185	0.392994	0.447773	0.226331	0.38717	0.33949	0.545586	0.436449	0.5376	0.494278	0.459671	0.494717	-0.155227
cg01759756	chr11	66579670	66579671	-	0.008	0.4098	0.796432	0.60702	0.683793	0.743069	0.648023	0.80707	0.815451	0.802993	0.794263	0.920854	0.828126	-0.180103
cg01760090	chr8	1365659	1365660	+	0.001	0.530544	0.539087	0.561529	0.344335	0.252675	0.445634	0.630709	0.698212	0.884303	0.695843	0.624458	0.706705	-0.261071
cg01762091	chr17	7197775	7197776	+	0.002	0.274703	0.0713503	0.107722	0.0297596	0.0325297	0.103213	0.319792	0.298784	0.184584	0.315005	0.321363	0.287906	-0.184693
cg01790771	chr12	45611089	45611090	-	0.049	0.206182	0.215151	0.376064	0.128809	0.308397	0.246921	0.311848	0.31534	0.466752	0.371242	0.296231	0.352283	-0.105362
cg01799671	chr16	81560752	81560753	-	0.037	0.626316	0.483855	0.625722	0.397384	0.500806	0.526817	0.611295	0.602442	0.715104	0.630936	0.632052	0.638366	-0.111549
cg01904243	chr14	74251254	74251255	+	0.044	0.686669	0.452889	0.654092	0.412465	0.549959	0.551215	0.666967	0.652972	0.724675	0.678163	0.644451	0.673446	-0.122231
cg01932956	chr16	22959525	22959526	+	0.021	0.0740939	0.120078	0.186371	0.0421451	0.0604939	0.0966364	0.145693	0.18062	0.211993	0.158475	0.304679	0.200292	-0.103656
cg01972979	chrX	133680446	133680447	+	0.007	0.624061	0.420099	0.494238	0.349973	0.490498	0.475774	0.651089	0.712638	0.722627	0.685147	0.544028	0.663106	-0.187332
cg02008651	chr14	29247148	29247149	-	0.044	0.365148	0.288343	0.361083	0.305479	0.227978	0.309606	0.562509	0.545508	0.704421	0.544062	0.159247	0.503149	-0.193543
cg02048922	chr8	143546858	143546859	-	0.047	0.700475	0.649838	0.647264	0.793171	0.754653	0.70908	0.853073	0.841532	0.81184	0.849197	0.694243	0.809977	-0.100897
cg02081019	chr5	92930813	92930814	-	0.016	0.500225	0.448539	0.602323	0.256263	0.5708	0.47563	0.599772	0.560121	0.750754	0.636913	0.606163	0.630745	-0.155114
cg02121529	chr13	40746549	40746550	+	0.022	0.469744	0.338135	0.504898	0.280338	0.347741	0.388171	0.451707	0.465419	0.573059	0.523269	0.529648	0.50862	-0.120449
cg02153340	chr1	155202674	155202675	+	0.026	0.470448	0.342311	0.441471	0.575987	0.42901	0.451845	0.48098	0.586911	0.535756	0.67232	0.71252	0.597698	-0.145852
cg02192520	chr12	56114155	56114156	+	0.046	0.764272	0.545805	0.754891	0.547491	0.588932	0.640278	0.710909	0.721798	0.75995	0.751361	0.833392	0.755482	-0.115204
cg02208793	chr11	84634615	84634616	-	0.015	0.312857	0.433667	0.525339	0.386903	0.396373	0.411028	0.540748	0.496385	0.670185	0.520046	0.469076	0.539288	-0.12826
cg02262187	chr16	31498651	31498652	-	0.048	0.311282	0.275245	0.363486	0.349276	0.291005	0.318059	0.473712	0.372902	0.536737	0.451139	0.257826	0.418463	-0.100404
cg02268650	chrX	68348465	68348466	-	0.021	0.0977794	0.134424	0.209969	0.0626693	0.121512	0.125271	0.146362	0.219287	0.304808	0.191359	0.266623	0.225688	-0.100417
cg02272576	chr6	43868964	43868965	+	0.029	0.726474	0.561566	0.764987	0.561923	0.494891	0.621968	0.727524	0.721261	0.78539	0.745439	0.786916	0.753306	-0.131338
cg02304584	chr6	31650790	31650791	-	0.003	0.610409	0.45909	0.511658	0.336255	0.515456	0.486573	0.658567	0.658385	0.629857	0.706069	0.535849	0.637745	-0.151172
cg02372786	chr2	45167549	45167550	-	0.035	0.571089	0.418185	0.540748	0.342556	0.435804	0.461677	0.55386	0.565591	0.701838	0.56837	0.514083	0.580748	-0.119072
cg02383666	chr16	88534398	88534399	+	0.005	0.544285	0.590903	0.673276	0.556934	0.629404	0.59896	0.723732	0.691155	0.77526	0.773361	0.657435	0.724189	-0.125228
cg02389040	chr6	31650786	31650787	-	0.009	0.735115	0.566685	0.664321	0.4309	0.628509	0.605106	0.806411	0.784683	0.804217	0.879677	0.650496	0.785097	-0.179991
cg02407415	chr16	857454	857455	+	0.004	0.0232094	0.232497	0.28275	0.023498	0.0361224	0.119615	0.416859	0.327987	0.280548	0.362138	0.35839	0.349184	-0.229569
cg02473847	chr1	2284821	2284822	-	0.002	0.694486	0.530269	0.715063	0.629966	0.561951	0.626347	0.747557	0.729324	0.718579	0.736666	0.749115	0.736248	-0.109902
cg02479497	chr16	85548895	85548896	+	0.022	0.539895	0.465341	0.604189	0.41989	0.447764	0.495416	0.585101	0.514242	0.618993	0.620719	0.691895	0.60619	-0.110775
cg02490460	chr8	1365502	1365503	+	0	0.48807	0.518772	0.549722	0.401125	0.307879	0.453114	0.571232	0.641756	0.939216	0.752776	0.606428	0.702281	-0.249168
cg02493602	chr11	86383696	86383697	+	0.026	0.238962	0.400687	0.229472	0.1559	0.363116	0.277627	0.40025	0.390044	0.626911	0.45355	0.267897	0.427731	-0.150103
cg02508229	chr1	27336989	27336990	-	0.01	0.793947	0.72293	0.493485	0.625917	0.748446	0.676945	0.792011	0.792439	0.865097	0.814591	0.801589	0.813145	-0.1362
cg02546833	chr15	53372675	53372676	+	0.039	0.578369	0.602524	0.683439	0.819285	0.557825	0.648288	0.82276	0.767551	0.773657	0.751467	0.675243	0.758136	-0.109847
cg02575675	chr16	29875187	29875188	-	0.002	0.663459	0.645278	0.752458	0.616177	0.711629	0.6778	0.754594	0.754149	0.919091	0.822208	0.821398	0.814288	-0.136488
cg02601475	chr5	121518272	121518273	-	0.028	0.711511	0.511796	0.691187	0.403847	0.573821	0.578432	0.651813	0.701161	0.779941	0.710964	0.723578	0.713491	-0.135059
cg02680050	chr12	133179887	133179888	-	0.02	0.453015	0.503408	0.65677	0.561486	0.478093	0.530554	0.699479	0.625072	0.656843	0.597095	0.607808	0.637259	-0.106705
cg02737268	chr20	3780182	3780183	+	0	0.276006	0.357319	0.223419	0.25238	0.338953	0.289615	0.396886	0.391112	0.397939	0.425396	0.406541	0.403575	-0.113959
cg02762634	chr17	26458796	26458797	+	0.026	0.633644	0.660033	0.747718	0.371552	0.644753	0.61154	0.718218	0.666811	0.752745	0.747307	0.762852	0.729586	-0.118046
cg02806675	chr3	59627287	59627288	-	0.041	0.574124	0.519137	0.659558	0.454144	0.557365	0.552866	0.576606	0.63612	0.757481	0.634337	0.709001	0.662709	-0.109844
cg02863169	chr2	45173548	45173549	-	0.038	0.725007	0.525622	0.668774	0.545884	0.598124	0.612682	0.746344	0.778876	0.834727	0.791043	0.588324	0.747863	-0.135181
cg02873525	chr19	48675305	48675306	-	0.033	0.492319	0.719804	0.710143	0.715687	0.589714	0.645533	0.836653	0.726132	0.748085	0.699654	0.788216	0.759748	-0.114215
cg02933431	chr6	32081711	32081712	+	0.033	0.306683	0.428199	0.625933	0.418023	0.480577	0.451883	0.524024	0.565941	0.59307	0.547864	0.628483	0.571877	-0.119993
cg02976617	chr5	102898463	102898464	-	0.001	0.121313	0.107713	0.103255	0.0765752	0.0396991	0.0897112	0.212135	0.215631	0.169665	0.222448	0.316649	0.227306	-0.137595
cg02988775	chr1	6524642	6524643	-	0.019	0.605674	0.699306	0.773136	0.674735	0.625645	0.675699	0.740212	0.732881	0.852707	0.75078	0.805626	0.776441	-0.100742
cg02996355	chr14	81879375	81879376	-	0.015	0.151578	0.477852	0.372178	0.246642	0.338271	0.317304	0.533219	0.438397	0.418991	0.444433	0.496638	0.466336	-0.149032
cg03048654	chr10	118893138	118893139	-	0.018	0.0454233	0.282026	0.386896	0.352585	0.292365	0.271859	0.60875	0.441204	0.299841	0.431885	0.407681	0.437872	-0.166013
cg03090969	chr8	104117866	104117867	-	0.015	0.318432	0.318931	0.348372	0.236601	0.344777	0.313422	0.451105	0.428896	0.505103	0.385276	0.332163	0.420509	-0.107086
cg03102494	chr1	147801721	147801722	+	0.009	0.296883	0.223887	0.228966	0.301305	0.110631	0.232334	0.286188	0.338944	0.440147	0.360715	0.377012	0.360601	-0.128267
cg03110787	chr19	6217641	6217642	+	0.027	0.844832	0.609829	0.788883	0.563966	0.647808	0.691064	0.796199	0.78815	0.865056	0.858414	0.818783	0.825321	-0.134257
cg03111039	chr10	90751583	90751584	-	0.004	0.213047	0.115216	0.283764	0.240171	0.134287	0.197297	0.314401	0.295896	0.254106	0.289985	0.339427	0.298763	-0.101466
cg03143164	chr7	155283886	155283887	-	0.048	0.172215	0.201499	0.335504	0.0912028	0.181487	0.196381	0.202299	0.270608	0.446498	0.277753	0.359635	0.311358	-0.114977
cg03191919	chr3	196134040	196134041	-	0.013	0.643149	0.632193	0.716077	0.440637	0.583886	0.603188	0.706854	0.672649	0.777939	0.694536	0.751079	0.720612	-0.117423
cg03210314	chr16	22959594	22959595	+	0.014	0.195077	0.131135	0.222099	0.0947672	0.0754274	0.143701	0.217908	0.231872	0.272695	0.201548	0.391482	0.263101	-0.1194
cg03223687	chrX	44201344	44201345	+	0.045	0.863933	0.728131	0.897263	0.685822	0.735704	0.782171	0.863372	0.855531	0.910635	0.879998	0.903029	0.882513	-0.100342
cg03251655	chr17	33759512	33759513	+	0.013	0.183766	0.302211	0.374313	0.379736	0.433509	0.334707	0.485055	0.407736	0.612032	0.413065	0.401671	0.463912	-0.129205
cg03264133	chr6	25882463	25882464	+	0.032	0.25163	0.339307	0.312692	0.289682	0.334993	0.305661	0.56089	0.495755	0.269551	0.514311	0.356927	0.439487	-0.133826
cg03264585	chr17	21792970	21792971	+	0.016	0.709045	0.699126	0.681324	0.834333	0.792195	0.743205	0.587395	0.660101	0.566658	0.613174	0.643775	0.614221	0.128984
cg03295251	chr16	78601911	78601912	-	0.033	0.650978	0.651078	0.780003	0.823191	0.647093	0.710469	0.843042	0.791347	0.847449	0.81992	0.758572	0.812066	-0.101597
cg03364486	chr8	29172968	29172969	-	0.014	0.367185	0.369167	0.53773	0.401366	0.426565	0.420402	0.546978	0.502043	0.626101	0.503018	0.588905	0.553409	-0.133007
cg03428951	chr5	177434336	177434337	-	0.007	0.596397	0.681195	0.705936	0.651649	0.432755	0.613587	0.779016	0.791531	0.680342	0.755986	0.824418	0.766259	-0.152672
cg03446012	chr6	151646601	151646602	+	0.02	0.15406	0.0709137	0.25443	0.0798931	0.053605	0.12258	0.339467	0.170024	0.182898	0.174524	0.354705	0.244323	-0.121743
cg03452625	chr3	11537620	11537621	+	0.045	0.419118	0.433282	0.510779	0.175341	0.471912	0.402087	0.467055	0.482572	0.611849	0.518965	0.465049	0.509098	-0.107011
cg03455107	chr17	54509207	54509208	+	0.025	0.660929	0.500122	0.658709	0.522714	0.522184	0.572932	0.719507	0.628579	0.632423	0.626416	0.809056	0.683196	-0.110265
cg03492136	chr12	111137054	111137055	-	0.015	0.532883	0.521667	0.662157	0.479716	0.578944	0.555073	0.635157	0.67233	0.665447	0.65321	0.681457	0.66152	-0.106447
cg03507534	chr1	36789937	36789938	-	0.008	0.61326	0.594851	0.675901	0.420363	0.661433	0.593162	0.706692	0.728037	0.823886	0.738399	0.672669	0.733936	-0.140775
cg03517284	chr6	25882590	25882591	-	0.034	0.277153	0.30639	0.273841	0.266708	0.277992	0.280417	0.523651	0.475164	0.229374	0.512343	0.341968	0.4165	-0.136083
cg03552025	chr12	52437451	52437452	+	0.014	0.680442	0.453161	0.586201	0.486222	0.540363	0.549278	0.681047	0.625185	0.675309	0.656801	0.643096	0.656287	-0.10701
cg03555881	chr6	31275551	31275552	-	0.001	0.687975	0.611027	0.644549	0.765425	0.565839	0.654963	0.881827	0.854532	0.831389	0.826502	0.807605	0.840371	-0.185408
cg03557725	chr12	96251912	96251913	+	0.017	0.314906	0.309099	0.4737	0.365722	0.317981	0.356282	0.403191	0.493582	0.568134	0.475378	0.412015	0.47046	-0.114178
cg03577139	chr4	24796988	24796989	-	0.007	0.201695	0.2787	0.349322	0.193362	0.320103	0.268636	0.328222	0.351884	0.4483	0.360036	0.386779	0.375044	-0.106408
cg03593908	chr13	60842299	60842300	-	0.004	0.551463	0.530319	0.395893	0.414567	0.4807	0.474588	0.555362	0.540784	0.594205	0.541538	0.653931	0.577164	-0.102576
cg03607891	chr1	66099615	66099616	-	0.02	0.474695	0.469527	0.668618	0.447666	0.546621	0.521425	0.60141	0.600797	0.645747	0.68052	0.700307	0.645756	-0.124331
cg03621841	chr16	49673985	49673986	+	0.016	0.517205	0.263988	0.485346	0.16696	0.384854	0.36367	0.572575	0.472099	0.703022	0.53638	0.496702	0.556156	-0.192485
cg03682581	chr2	85832389	85832390	-	0.015	0.732185	0.607615	0.742938	0.404851	0.657353	0.628988	0.751434	0.722532	0.849515	0.748333	0.761532	0.766669	-0.137681
cg03687532	chr16	54228358	54228359	-	0.031	0.378554	0.393559	0.499005	0.414954	0.404021	0.418019	0.437453	0.4894	0.618763	0.465136	0.641264	0.530403	-0.112385
cg03689092	chr2	128439345	128439346	+	0.003	0.629012	0.526759	0.535668	0.416293	0.564187	0.534384	0.659547	0.675131	0.735102	0.666445	0.627006	0.672646	-0.138262
cg03703111	chr5	92925721	92925722	-	0.034	0.557801	0.326431	0.596327	0.422662	0.461019	0.472848	0.596539	0.538299	0.640774	0.579385	0.591092	0.589218	-0.11637
cg03709468	chr4	156828285	156828286	-	0.046	0.671005	0.621684	0.822218	0.535684	0.585727	0.647264	0.765679	0.729566	0.84961	0.745818	0.728085	0.763752	-0.116488
cg03728674	chr16	88485656	88485657	+	0.039	0.601643	0.50954	0.650144	0.773666	0.559517	0.618902	0.729744	0.743263	0.749502	0.740076	0.658979	0.724313	-0.105411
cg03749207	chr16	857863	857864	+	0.002	0.0151576	0.22715	0.267742	0.013296	0.0173363	0.108136	0.346434	0.286165	0.2393	0.346859	0.324639	0.308679	-0.200543
cg03768796	chr17	3884973	3884974	-	0.031	0.461633	0.885678	0.910458	0.973224	0.921629	0.830525	0.944282	0.962236	0.957661	0.947807	0.941303	0.950658	-0.120133
cg03796024	chr10	3151764	3151765	-	0.021	0.514047	0.914505	0.515279	0.915586	0.905782	0.75304	0.9247	0.921357	0.917743	0.906722	0.934054	0.920915	-0.167875
cg03805182	chr16	73078071	73078072	-	0.006	0.408479	0.305984	0.435321	0.228368	0.38626	0.352882	0.452697	0.493637	0.569893	0.497823	0.427656	0.488341	-0.135459
cg03826564	chr15	101629310	101629311	-	0.001	0.406334	0.571325	0.563726	0.27236	0.565029	0.475755	0.655912	0.578352	0.598273	0.579868	0.589236	0.600328	-0.124573
cg03861966	chr12	94136602	94136603	-	0.037	0.198235	0.233359	0.23353	0.066377	0.261311	0.198562	0.315575	0.306374	0.382708	0.339997	0.156475	0.300226	-0.101663
cg03880033	chr16	55866757	55866758	+	0.011	0.669343	0.567437	0.677566	0.584201	0.751718	0.650053	0.709377	0.728388	0.781021	0.746652	0.84812	0.762711	-0.112658
cg03889263	chr3	177002388	177002389	+	0.021	0.516912	0.594784	0.668108	0.335368	0.546288	0.532292	0.61989	0.693252	0.807425	0.646989	0.628893	0.67929	-0.146997
cg03890628	chr1	9666902	9666903	-	0.02	0.585166	0.425092	0.613592	0.557738	0.549627	0.546243	0.552096	0.628705	0.710359	0.673945	0.728653	0.658752	-0.112508
cg03904042	chr20	32255491	32255492	+	0.003	0.49808	0.479735	0.484782	0.135325	0.386363	0.396857	0.619692	0.49771	0.560783	0.501076	0.561033	0.548059	-0.151202
cg03909863	chr11	638404	638405	+	0.004	0.592972	0.698471	0.742592	0.44671	0.740765	0.644302	0.870091	0.768011	0.903093	0.833594	0.789625	0.832883	-0.188581
cg03916225	chr1	111768837	111768838	-	0.004	0.681891	0.551002	0.627603	0.54897	0.515737	0.585041	0.682148	0.670973	0.742699	0.672756	0.685064	0.690728	-0.105688
cg03951603	chr15	89903565	89903566	-	0.009	0.391094	0.259455	0.463313	0.207211	0.377486	0.339712	0.464737	0.460369	0.547833	0.469031	0.418064	0.472007	-0.132295
cg03951833	chr1	147801103	147801104	-	0.006	0.247984	0.246707	0.254519	0.300178	0.199981	0.249874	0.285154	0.358409	0.395383	0.402582	0.373826	0.363071	-0.113197
cg03962421	chr7	156943850	156943851	+	0.021	0.570586	0.48028	0.627641	0.410068	0.511745	0.520064	0.585603	0.596209	0.704303	0.617145	0.636358	0.627923	-0.10786
cg04012053	chr16	70680631	70680632	+	0.031	0.624742	0.770056	0.760109	0.577565	0.753048	0.697104	0.768866	0.735683	0.911161	0.78101	0.827394	0.804823	-0.107719
cg04055739	chrX	11157142	11157143	-	0.004	0.535286	0.453915	0.621264	0.590765	0.386239	0.517494	0.674558	0.653887	0.594843	0.632908	0.828086	0.676856	-0.159363
cg04118610	chr4	62707027	62707028	-	0.04	0.0836812	0.0488012	0.715126	0.0813051	0.698838	0.32555	0.952081	0.851932	0.93228	0.93146	0.0470615	0.742963	-0.417413
cg04122358	chr8	2591265	2591266	-	0.026	0.205655	0.310954	0.022081	0.168145	0.207272	0.182821	0.350386	0.262015	0.37353	0.266352	0.2216	0.294777	-0.111955
cg04197086	chr13	112626876	112626877	-	0.016	0.506506	0.443746	0.527475	0.610838	0.590258	0.535764	0.710436	0.633928	0.642621	0.574043	0.62072	0.63635	-0.100585
cg04286558	chr2	131209589	131209590	-	0.014	0.777586	0.72513	0.580468	0.473408	0.671805	0.645679	0.882119	0.773448	0.737801	0.779889	0.763041	0.787259	-0.14158
cg04293307	chr17	63553581	63553582	+	0.038	0.706706	0.573931	0.694237	0.557946	0.61096	0.628756	0.737316	0.742074	0.856145	0.738879	0.602965	0.735476	-0.10672
cg04301754	chr14	29225849	29225850	+	0.007	0.117501	0.231653	0.299438	0.146643	0.115484	0.182144	0.392845	0.318784	0.301412	0.308197	0.245764	0.313401	-0.131257
cg04337403	chr2	3288737	3288738	+	0.04	0.870088	0.798092	0.710756	0.892281	0.797169	0.813677	0.665247	0.689995	0.535974	0.658282	0.755558	0.661011	0.152666
cg04339882	chr1	17286363	17286364	-	0.015	0.551916	0.556313	0.699687	0.569101	0.659295	0.607262	0.665433	0.767924	0.704852	0.704276	0.69704	0.707905	-0.100643
cg04376123	chr7	73895109	73895110	+	0.024	0.32538	0.425561	0.493006	0.285334	0.385693	0.382995	0.466229	0.416931	0.502134	0.499663	0.537271	0.484446	-0.101451
cg04386400	chr6	31651158	31651159	-	0.036	0.555718	0.380972	0.44135	0.222737	0.448788	0.409913	0.597515	0.616802	0.578473	0.650564	0.396116	0.567894	-0.157981
cg04398451	chr17	18023971	18023972	-	0.017	0.834312	0.737285	0.851801	0.861113	0.698536	0.796609	0.961785	0.929698	0.86108	0.94029	0.836182	0.905807	-0.109198
cg04461101	chr6	32515251	32515252	+	0.036	0.808525	0.40263	0.550541	0.393474	0.46134	0.523302	0.83737	0.869689	0.781317	0.84385	0.469651	0.760375	-0.237073
cg04481923	chr5	135416205	135416206	-	0.044	0.562844	0.486586	0.565541	0.546908	0.0765634	0.447688	0.55658	0.606229	0.55605	0.560257	0.58475	0.572773	-0.125085
cg04566826	chr19	34289872	34289873	-	0.002	0.639119	0.570252	0.663692	0.437575	0.599272	0.581982	0.717287	0.662837	0.734704	0.677045	0.671101	0.692595	-0.110613
cg04567140	chr1	31000432	31000433	+	0.019	0.207635	0.329588	0.512686	0.226975	0.333178	0.322013	0.454519	0.440855	0.555491	0.418513	0.445251	0.462926	-0.140913
cg04601775	chr6	32557478	32557479	+	0.02	0.708383	0.699047	0.804224	0.821023	0.672412	0.741017	0.637053	0.681802	0.601626	0.643495	0.601646	0.633124	0.107893
cg04607865	chr7	20834362	20834363	+	0.044	0.051835	0.107225	0.300081	0.153889	0.0842524	0.139456	0.343628	0.240695	0.434686	0.237496	0.132114	0.277724	-0.138267
cg04672903	chr4	6675309	6675310	-	0.026	0.513048	0.520227	0.45794	0.470177	0.499583	0.492195	0.797936	0.64175	0.421335	0.607964	0.601701	0.614137	-0.121942
cg04681525	chr9	132145577	132145578	-	0.008	0.339052	0.358281	0.425444	0.181463	0.262463	0.31334	0.407832	0.426448	0.540606	0.45352	0.385142	0.442709	-0.129369
cg04723343	chr2	238647913	238647914	+	0.004	0.582041	0.585464	0.648528	0.528783	0.596699	0.588303	0.653002	0.636082	0.826425	0.718365	0.680597	0.702894	-0.114591
cg04737881	chr4	183060943	183060944	-	0.009	0.805754	0.807369	0.845086	0.847371	0.792066	0.819529	0.729256	0.761656	0.575717	0.707757	0.719962	0.69887	0.12066
cg04788926	chr18	76617198	76617199	+	0.049	0.407139	0.571253	0.79174	0.467222	0.588786	0.565228	0.685679	0.634893	0.824604	0.640957	0.810907	0.719408	-0.15418
cg04797742	chr2	45171097	45171098	+	0.042	0.697213	0.554773	0.654561	0.53889	0.594046	0.607897	0.71858	0.73617	0.848152	0.774025	0.573226	0.730031	-0.122134
cg04816171	chr7	42896398	42896399	-	0.007	0.412523	0.201214	0.19745	0.129091	0.26114	0.240284	0.412076	0.383585	0.366654	0.421364	0.4752	0.411776	-0.171492
cg04850286	chr10	81895943	81895944	+	0.03	0.518115	0.52729	0.453504	0.283959	0.491427	0.454859	0.700041	0.654009	0.755221	0.645023	0.376947	0.626248	-0.171389
cg04908625	chr3	123166882	123166883	+	0.047	0.325491	0.313266	0.38705	0.127178	0.440387	0.318674	0.460627	0.473815	0.294712	0.474223	0.421615	0.424998	-0.106324
cg04954795	chr21	42617159	42617160	-	0.01	0.391151	0.38528	0.937453	0.930279	0.93612	0.716057	0.949145	0.94749	0.933167	0.939373	0.948669	0.943569	-0.227512
cg04969428	chr6	67372805	67372806	+	0.029	0.409929	0.420281	0.592271	0.529087	0.46767	0.483848	0.587698	0.571323	0.662045	0.533896	0.643112	0.599615	-0.115767
cg04995521	chr1	8468871	8468872	-	0.008	0.514991	0.397737	0.570787	0.385289	0.452873	0.464335	0.600919	0.592254	0.61286	0.609688	0.517996	0.586743	-0.122408
cg04995753	chr4	146600646	146600647	-	0.021	0.550083	0.541414	0.693991	0.526325	0.54253	0.570869	0.648006	0.635853	0.709843	0.717089	0.674898	0.677138	-0.106269
cg05041795	chr8	1365749	1365750	+	0.002	0.629975	0.739255	0.731387	0.678108	0.586484	0.673042	0.839424	0.835372	0.911093	0.859846	0.809783	0.851104	-0.178062
cg05053978	chr6	117869098	117869099	-	0.004	0.241277	0.179286	0.149085	0.136247	0.17502	0.176183	0.209801	0.313339	0.225916	0.317132	0.361293	0.285496	-0.109313
cg05054998	chr21	46378625	46378626	+	0.002	0.632963	0.452578	0.640348	0.451467	0.538557	0.543183	0.642392	0.63894	0.751306	0.65782	0.669664	0.672024	-0.128842
cg05067427	chr16	54227914	54227915	-	0.015	0.117895	0.146446	0.299326	0.113698	0.150863	0.165646	0.282605	0.242828	0.245505	0.258261	0.386018	0.283044	-0.117398
cg05096756	chr10	50143517	50143518	+	0.004	0.728961	0.590762	0.779267	0.647175	0.63302	0.675837	0.81134	0.782287	0.792258	0.789921	0.805189	0.796199	-0.120362
cg05098815	chrY	9449618	9449619	-	0.022	0.486847	0.774212	0.628292	0.693389	0.66263	0.649074	0.864595	0.687388	0.786184	0.786845	0.749394	0.774881	-0.125807
cg05126444	chr21	38629859	38629860	-	0.002	0.116268	0.116373	0.110558	0.0470568	0.0734398	0.0927392	0.202854	0.160471	0.218215	0.158521	0.264472	0.200907	-0.108168
cg05139515	chr1	2896587	2896588	+	0.019	0.814561	0.682077	0.741525	0.570742	0.689294	0.69964	0.818996	0.746654	0.912887	0.844979	0.798911	0.824485	-0.124845
cg05174890	chr17	33759986	33759987	+	0.046	0.0405821	0.137699	0.095421	0.154445	0.261712	0.137972	0.358907	0.219255	0.40493	0.203431	0.122641	0.261833	-0.123861
cg05202434	chrY	8571846	8571847	+	0.001	0.512357	0.517801	0.492904	0.426719	0.411007	0.472157	0.625494	0.564804	0.723863	0.551937	0.549765	0.603173	-0.131015
cg05233373	chr2	161127261	161127262	-	0.006	0.444505	0.428325	0.539711	0.259125	0.501229	0.434579	0.567249	0.57307	0.701594	0.608952	0.536309	0.597435	-0.162856
cg05237015	chr6	99842241	99842242	-	0.001	0.279683	0.279327	0.341051	0.323736	0.356892	0.316138	0.485083	0.389338	0.372042	0.396439	0.46913	0.422406	-0.106269
cg05253110	chr7	141130687	141130688	+	0.003	0.292521	0.221285	0.321697	0.151121	0.275735	0.252472	0.321959	0.343422	0.425075	0.34204	0.345693	0.355638	-0.103166
cg05320533	chr16	89541815	89541816	+	0.023	0.514549	0.47705	0.625962	0.451066	0.459514	0.505628	0.582199	0.602905	0.660064	0.589014	0.600676	0.606972	-0.101344
cg05401069	chr18	21572634	21572635	+	0.027	0.790717	0.605626	0.83366	0.702725	0.711186	0.728783	0.789605	0.82079	0.846002	0.855264	0.834181	0.829168	-0.100385
cg05428452	chr6	32712979	32712980	+	0.008	0.860609	0.879163	0.912384	0.934176	0.905231	0.898313	0.728186	0.825415	0.644066	0.786429	0.71102	0.739023	0.159289
cg05449108	chr17	114319	114320	-	0.049	0.88338	0.643718	0.766498	0.912541	0.920751	0.825378	0.636324	0.693239	0.581538	0.59973	0.621063	0.626379	0.198999
cg05477457	chr4	169799308	169799309	+	0.032	0.0494845	0.197857	0.328747	0.299873	0.217036	0.218599	0.36433	0.281048	0.537593	0.291858	0.313534	0.357672	-0.139073
cg05520031	chr9	129262012	129262013	+	0.02	0.396968	0.364331	0.418556	0.183192	0.4002	0.352649	0.470092	0.473559	0.581721	0.510282	0.351066	0.477344	-0.124694
cg05667348	chr10	118892581	118892582	+	0.002	0.108534	0.368592	0.442608	0.40912	0.403236	0.346418	0.623805	0.53539	0.430007	0.534947	0.455324	0.515895	-0.169477
cg05683630	chr6	13860661	13860662	+	0.029	0.301508	0.357009	0.353043	0.379215	0.161926	0.31054	0.343751	0.397114	0.380261	0.390972	0.602333	0.422886	-0.112346
cg05717871	chr11	638507	638508	-	0.013	0.489709	0.59052	0.603035	0.429741	0.60806	0.544213	0.734845	0.646574	0.719109	0.636312	0.596917	0.666752	-0.122539
cg05718389	chr15	59950093	59950094	-	0.021	0.18586	0.33971	0.44989	0.238913	0.336943	0.310263	0.432686	0.37133	0.47288	0.411375	0.458052	0.429264	-0.119001
cg05723219	chr4	187605157	187605158	-	0.023	0.841781	0.659755	0.8855	0.713449	0.742273	0.768552	0.855667	0.853602	0.864566	0.893332	0.879752	0.869384	-0.100832
cg05764570	chr6	32726692	32726693	+	0.008	0.704488	0.728738	0.731606	0.775781	0.720148	0.732152	0.583495	0.643158	0.506742	0.606012	0.598588	0.587599	0.144553
cg05772155	chr10	65801432	65801433	+	0.004	0.41751	0.360476	0.491666	0.343319	0.351601	0.392914	0.556494	0.494697	0.536818	0.513738	0.528257	0.526001	-0.133086
cg05813818	chr16	875966	875967	-	0.025	0.706415	0.5679	0.738961	0.548821	0.634828	0.639385	0.724491	0.733156	0.854415	0.830367	0.703038	0.769093	-0.129708
cg05857999	chr6	31650760	31650761	-	0.007	0.481024	0.31149	0.369052	0.174931	0.364561	0.340212	0.534934	0.559082	0.506747	0.61737	0.370944	0.517815	-0.177604
cg05860956	chr12	312595	312596	-	0.035	0.132912	0.400991	0.18024	0.325513	0.211641	0.250259	0.407747	0.348469	0.373435	0.309371	0.568781	0.401561	-0.151301
cg05884192	chr14	52515736	52515737	+	0.05	0.454829	0.349711	0.583115	0.328525	0.46071	0.435378	0.517822	0.510745	0.598341	0.506359	0.575281	0.54171	-0.106332
cg05926928	chr17	57297772	57297773	-	0.019	0.211039	0.186134	0.0329348	0.0194535	0.21688	0.133288	0.303293	0.166542	0.308093	0.207306	0.290701	0.255187	-0.121899
cg05932702	chr12	72148251	72148252	+	0.026	0.248322	0.41209	0.327022	0.249893	0.462822	0.34003	0.493491	0.422385	0.474247	0.412799	0.407334	0.442051	-0.102021
cg06075789	chr19	39894767	39894768	+	0.011	0.342922	0.308609	0.423323	0.132692	0.325358	0.306581	0.418055	0.414055	0.592774	0.426657	0.394243	0.449157	-0.142576
cg06087623	chr1	2203012	2203013	+	0.024	0.65873	0.553654	0.66124	0.484412	0.56487	0.584581	0.678828	0.637554	0.76276	0.736802	0.658008	0.69479	-0.110209
cg06092953	chr18	77905699	77905700	-	0.004	0.365551	0.298583	0.270648	0.158243	0.310374	0.28068	0.339285	0.444158	0.414594	0.456255	0.455262	0.421911	-0.141231
cg06108461	chr20	60628389	60628390	-	0.016	0.495534	0.861767	0.729392	0.744759	0.664647	0.69922	0.862673	0.830473	0.87304	0.811135	0.86195	0.847854	-0.148634
cg06115810	chr1	66797599	66797600	+	0.024	0.455282	0.223475	0.466965	0.1675	0.35846	0.334336	0.423893	0.461388	0.622693	0.502757	0.4632	0.494786	-0.16045
cg06135285	chr17	19675785	19675786	+	0.002	0.663013	0.496201	0.623687	0.597817	0.506165	0.577377	0.730346	0.738469	0.688995	0.627041	0.734853	0.703941	-0.126564
cg06173663	chr7	101579929	101579930	-	0.009	0.303384	0.298358	0.407759	0.145905	0.33484	0.298049	0.423498	0.396493	0.58917	0.433392	0.375211	0.443553	-0.145504
cg06202276	chr4	154713333	154713334	+	0.001	0.3673	0.317192	0.409513	0.254331	0.34428	0.338523	0.469133	0.442018	0.430376	0.428674	0.423038	0.438648	-0.100125
cg06214007	chr1	89829308	89829309	+	0.017	0.652446	0.586485	0.639616	0.425622	0.554728	0.57178	0.674343	0.666434	0.760254	0.647158	0.633141	0.676266	-0.104487
cg06234051	chr17	70120541	70120542	+	0.036	0.762061	0.455056	0.666338	0.474121	0.57464	0.586443	0.659322	0.71696	0.825516	0.754035	0.684525	0.728071	-0.141628
cg06398242	chr2	46049176	46049177	-	0.03	0.889195	0.897487	0.893684	0.500158	0.847016	0.805508	0.907666	0.883594	0.938967	0.920791	0.891277	0.908459	-0.102951
cg06429214	chr5	110062417	110062418	-	0.025	0.0711163	0.0945919	0.100745	0.145574	0.169977	0.116401	0.2496	0.200865	0.0874131	0.179651	0.366717	0.216849	-0.100448
cg06433023	chr6	108488544	108488545	+	0.013	0.560854	0.389675	0.562862	0.358904	0.367505	0.44796	0.637747	0.594282	0.688565	0.624138	0.50356	0.609658	-0.161699
cg06471596	chr7	101579936	101579937	-	0.015	0.270449	0.286048	0.354874	0.119046	0.34734	0.275551	0.367334	0.376867	0.464401	0.392545	0.336216	0.387472	-0.111921
cg06482498	chr6	31802029	31802030	+	0.048	0.238989	0.287711	0.376929	0.320178	0.314531	0.307667	0.434461	0.40435	0.553044	0.435279	0.250533	0.415533	-0.107866
cg06500161	chr21	43656587	43656588	+	0.001	0.610632	0.590823	0.650402	0.582916	0.608673	0.608689	0.750661	0.705062	0.769414	0.713077	0.661916	0.720026	-0.111337
cg06504162	chr11	11559800	11559801	-	0.007	0.807922	0.474931	0.771564	0.680956	0.741144	0.695303	0.872363	0.811391	0.845952	0.865319	0.778524	0.83471	-0.139406
cg06521357	chr4	3486380	3486381	-	0.005	0.286689	0.326735	0.376199	0.187081	0.316594	0.29866	0.350962	0.36347	0.487642	0.396019	0.429556	0.40553	-0.10687
cg06531573	chr16	857576	857577	+	0.001	0.0300919	0.299734	0.346015	0.042303	0.0533781	0.154305	0.491824	0.431843	0.369371	0.44215	0.407689	0.428576	-0.274271
cg06565641	chr8	141359674	141359675	-	0.014	0.714241	0.597134	0.80995	0.64248	0.503018	0.653365	0.873755	0.741503	0.870181	0.764498	0.89512	0.829011	-0.175647
cg06601071	chr16	85525842	85525843	-	0.008	0.365652	0.303362	0.421136	0.240427	0.340338	0.334183	0.42554	0.421086	0.623739	0.436949	0.382294	0.457922	-0.123738
cg06611922	chr10	118893174	118893175	-	0.024	0.0477051	0.251763	0.336374	0.275127	0.229883	0.228171	0.507027	0.356189	0.260872	0.361745	0.296916	0.35655	-0.128379
cg06616051	chrX	153094332	153094333	+	0.027	0.138621	0.13855	0.266359	0.115226	0.19649	0.171049	0.280937	0.293306	0.452893	0.349986	0.127	0.300824	-0.129775
cg06619077	chr1	47656003	47656004	+	0.022	0.413893	0.23874	0.429953	0.160629	0.328052	0.314253	0.403354	0.39877	0.46232	0.445229	0.638837	0.469702	-0.155449
cg06653026	chr7	84892267	84892268	-	0.009	0.479642	0.524484	0.567703	0.61375	0.563972	0.54991	0.670118	0.694623	0.700362	0.627836	0.596609	0.65791	-0.107999
cg06721546	chr5	1594808	1594809	+	0.04	0.0633215	0.284198	0.0710069	0.0894846	0.0767217	0.116946	0.312088	0.283064	0.328396	0.288216	0.073076	0.256968	-0.140021
cg06735598	chr12	124196148	124196149	-	0.003	0.543595	0.574217	0.577195	0.585654	0.492235	0.554579	0.602872	0.684226	0.760663	0.679403	0.670672	0.679567	-0.124988
cg06739303	chr10	42863444	42863445	-	0.017	0.115823	0.13049	0.130893	0.123812	0.101744	0.120553	0.259838	0.188218	0.0777112	0.202547	0.407867	0.227236	-0.106684
cg06779110	chr14	29243173	29243174	+	0.008	0.0435013	0.0824614	0.12296	0.0444319	0.0690558	0.0724822	0.137671	0.183784	0.324223	0.176057	0.0814534	0.180638	-0.108156
cg06820621	chr5	92938232	92938233	-	0.032	0.142133	0.251676	0.422408	0.0668152	0.211111	0.218829	0.286434	0.330248	0.575071	0.348531	0.462935	0.400644	-0.181815
cg06821992	chr5	56790874	56790875	-	0.017	0.730366	0.564289	0.773729	0.59859	0.659708	0.665336	0.79018	0.748323	0.759844	0.805109	0.751712	0.771034	-0.105697
cg06833110	chr2	66673316	66673317	-	0.013	0.209562	0.248855	0.401155	0.169235	0.260109	0.257783	0.310151	0.424932	0.696219	0.385499	0.464358	0.456232	-0.198449
cg06833823	chr10	42863068	42863069	+	0.029	0.153987	0.176085	0.178354	0.12408	0.142858	0.155073	0.283825	0.259074	0.106798	0.214918	0.500776	0.273078	-0.118005
cg06850787	chr2	716357	716358	-	0.037	0.512822	0.793933	0.547719	0.619292	0.593116	0.613376	0.81195	0.766525	0.632555	0.740256	0.863438	0.762945	-0.149568
cg06960461	chr12	132950559	132950560	-	0.003	0.329514	0.30265	0.312707	0.209807	0.266321	0.2842	0.345121	0.365663	0.466433	0.368161	0.386811	0.386438	-0.102238
cg06983765	chr8	1365906	1365907	+	0.035	0.521175	0.565293	0.624423	0.785528	0.578477	0.614979	0.700547	0.759725	0.707933	0.762496	0.799819	0.746104	-0.131125
cg07027613	chr12	7260608	7260609	-	0.003	0.637364	0.487984	0.646533	0.429902	0.495616	0.53948	0.644772	0.650597	0.725125	0.677709	0.674706	0.674582	-0.135102
cg07038342	chr3	145969625	145969626	-	0.026	0.255574	0.277535	0.36531	0.275645	0.249709	0.284755	0.370709	0.299351	0.373901	0.310243	0.596566	0.390154	-0.105399
cg07095330	chr17	36889069	36889070	+	0.01	0.677264	0.562298	0.747922	0.610917	0.635143	0.646709	0.766393	0.752145	0.730626	0.732039	0.848719	0.765984	-0.119275
cg07096238	chr2	66589902	66589903	-	0.005	0.559164	0.62121	0.667523	0.430763	0.593035	0.574339	0.702216	0.665221	0.730189	0.729462	0.768412	0.7191	-0.144761
cg07167423	chr1	36042986	36042987	-	0.035	0.190973	0.246854	0.388304	0.109775	0.239536	0.235088	0.290844	0.326184	0.490124	0.356988	0.338425	0.360513	-0.125425
cg07194250	chrX	133680463	133680464	+	0.039	0.73398	0.395219	0.487934	0.424568	0.578159	0.523972	0.647096	0.686194	0.777591	0.690884	0.551991	0.670751	-0.146779
cg07212818	chr11	638076	638077	-	0	0.343437	0.43401	0.485162	0.391979	0.476139	0.426145	0.586088	0.509858	0.527468	0.530743	0.526787	0.536189	-0.110043
cg07216036	chr12	132950611	132950612	-	0.009	0.191103	0.0615708	0.121596	0.049196	0.052843	0.0952619	0.167282	0.17823	0.362414	0.226504	0.159887	0.218864	-0.123602
cg07223240	chr6	170468271	170468272	+	0.018	0.4691	0.295777	0.4694	0.384617	0.419291	0.407637	0.424128	0.504769	0.606659	0.508245	0.556849	0.52013	-0.112493
cg07280936	chr4	3486204	3486205	-	0.029	0.37791	0.447059	0.656462	0.353599	0.5277	0.472546	0.538804	0.567918	0.815059	0.606997	0.669378	0.639631	-0.167085
cg07294774	chr14	80678613	80678614	+	0.02	0.0988101	0.116673	0.232653	0.0525372	0.100502	0.120235	0.164259	0.193052	0.321468	0.211307	0.213449	0.220707	-0.100472
cg07302910	chr10	118891355	118891356	-	0	0.286408	0.463556	0.488648	0.4701	0.434183	0.428579	0.632653	0.529462	0.503229	0.524399	0.49693	0.537335	-0.108756
cg07314298	chr2	11723111	11723112	+	0.011	0.711537	0.67492	0.766272	0.75853	0.72384	0.72702	0.520545	0.658951	0.521711	0.619484	0.542931	0.572724	0.154296
cg07323141	chr2	239140169	239140170	-	0.021	0.0124792	0.0453927	0.0232218	0.0375648	0.0481114	0.033354	0.242263	0.13272	0.241634	0.147478	0.0193175	0.156682	-0.123328
cg07351675	chr7	1578263	1578264	-	0.018	0.767504	0.772467	0.841383	0.503978	0.748372	0.726741	0.835841	0.793643	0.96161	0.870098	0.797401	0.851719	-0.124978
cg07371589	chr1	151104367	151104368	+	0.034	0.484925	0.273407	0.512601	0.296589	0.428654	0.399235	0.478207	0.606955	0.705667	0.662005	0.393149	0.569197	-0.169961
cg07377422	chr19	46318633	46318634	+	0.018	0.303562	0.244282	0.381114	0.115315	0.274064	0.263667	0.331087	0.384208	0.550348	0.427618	0.316335	0.401919	-0.138252
cg07387335	chr15	34781891	34781892	+	0.018	0.702009	0.675318	0.926101	0.371392	0.710289	0.677022	0.929783	0.841639	0.897825	0.893757	0.904828	0.893566	-0.216544
cg07416344	chr13	114872599	114872600	+	0.043	0.940241	0.750103	0.748792	0.510746	0.943664	0.778709	0.954613	0.953917	0.936314	0.928591	0.93955	0.942597	-0.163888
cg07452879	chr17	71274436	71274437	-	0.008	0.583446	0.419336	0.542656	0.385561	0.492778	0.484755	0.562734	0.57527	0.613756	0.569184	0.656906	0.59557	-0.110814
cg07455790	chr6	31650735	31650736	-	0.009	0.697261	0.460613	0.49933	0.279628	0.508681	0.489103	0.676938	0.687881	0.726487	0.803469	0.565414	0.692038	-0.202935
cg07460842	chr6	66804631	66804632	-	0.027	0.0661649	0.117445	0.34791	0.102331	0.345225	0.195815	0.482581	0.353224	0.474171	0.379268	0.137378	0.365324	-0.169509
cg07470512	chr20	32255052	32255053	-	0.001	0.262139	0.217738	0.221673	0.0758197	0.109947	0.177463	0.461957	0.344314	0.291265	0.297367	0.323365	0.343654	-0.16619
cg07473976	chr21	39292764	39292765	+	0.029	0.594703	0.65264	0.807336	0.616912	0.661001	0.666518	0.745581	0.751577	0.843243	0.746961	0.761428	0.769758	-0.10324
cg07500347	chr16	875881	875882	-	0.033	0.676354	0.607705	0.748607	0.457608	0.660071	0.630069	0.713828	0.735824	0.88678	0.771012	0.663535	0.754196	-0.124127
cg07521193	chr15	27819422	27819423	-	0.035	0.694222	0.868597	0.967255	0.613363	0.836306	0.795948	0.952641	0.87215	0.972433	0.930769	0.974693	0.940537	-0.144589
cg07564979	chr6	32451079	32451080	+	0.018	0.626661	0.479054	0.257389	0.0950955	0.893456	0.470331	0.944801	0.715904	0.937091	0.784526	0.867533	0.849971	-0.37964
cg07622833	chr11	33640167	33640168	-	0.011	0.567338	0.575956	0.643878	0.717229	0.544702	0.609821	0.744644	0.735379	0.76664	0.780623	0.657949	0.737047	-0.127226
cg07633119	chr10	93509667	93509668	+	0.015	0.738638	0.766743	0.822044	0.834401	0.592288	0.750823	0.879645	0.847994	0.86867	0.851561	0.812804	0.852135	-0.101312
cg07638938	chr10	131348599	131348600	+	0.03	0.461163	0.323489	0.490941	0.592448	0.576394	0.488887	0.573039	0.619316	0.645707	0.605355	0.575569	0.603797	-0.11491
cg07655627	chr5	102898729	102898730	+	0.002	0.167225	0.101436	0.129277	0.0921589	0.0420799	0.106435	0.260077	0.279505	0.230451	0.260415	0.423147	0.290719	-0.184283
cg07673020	chr7	42896801	42896802	-	0.012	0.399578	0.14367	0.171478	0.0877685	0.207721	0.202043	0.381029	0.375718	0.36929	0.364928	0.476326	0.393458	-0.191415
cg07676361	chr16	80966860	80966861	-	0.027	0.318024	0.523356	0.491467	0.440134	0.553941	0.465384	0.648895	0.516878	0.69452	0.516973	0.59328	0.594109	-0.128725
cg07687131	chr12	93967580	93967581	-	0.037	0.371042	0.413077	0.477779	0.15512	0.443574	0.372118	0.541746	0.527387	0.809545	0.556231	0.348764	0.556734	-0.184616
cg07691306	chr19	953575	953576	-	0	0.617603	0.50134	0.645152	0.562281	0.651553	0.595586	0.713252	0.707013	0.82169	0.714551	0.748138	0.740929	-0.145343
cg07748741	chr10	99330056	99330057	+	0.034	0.662858	0.656863	0.798445	0.766066	0.685502	0.713947	0.765003	0.778599	0.939314	0.790623	0.866641	0.828036	-0.114089
cg07758904	chr9	115652824	115652825	-	0.029	0.0950159	0.198151	0.111773	0.108858	0.0555922	0.113878	0.321786	0.185131	0.0715341	0.22182	0.404803	0.241015	-0.127137
cg07787634	chr1	241715378	241715379	+	0.028	0.848258	0.785646	0.788369	0.854254	0.834325	0.822171	0.76363	0.768962	0.572798	0.68887	0.731923	0.705237	0.116934
cg07803859	chr10	98590797	98590798	+	0.01	0.240542	0.315456	0.236853	0.289277	0.262408	0.268907	0.408943	0.321228	0.426857	0.29339	0.396819	0.369447	-0.10054
cg07809484	chr19	51231968	51231969	+	0.019	0.464193	0.31139	0.497567	0.410906	0.386337	0.414079	0.542996	0.578366	0.602305	0.551965	0.412168	0.53756	-0.123482
cg07843390	chr19	2541015	2541016	-	0.004	0.585292	0.504854	0.628515	0.443812	0.544975	0.54149	0.641028	0.623474	0.74185	0.641139	0.649842	0.659467	-0.117977
cg07847030	chr2	85361959	85361960	-	0.016	0.388652	0.327493	0.470195	0.239483	0.338595	0.352884	0.424153	0.471249	0.503523	0.474581	0.413501	0.457401	-0.104518
cg07866725	chr12	312592	312593	-	0.028	0.153713	0.430544	0.166687	0.252307	0.164618	0.233574	0.374939	0.326326	0.360767	0.283319	0.588576	0.386786	-0.153212
cg07886195	chr19	11263615	11263616	+	0.021	0.62863	0.525381	0.696262	0.493872	0.509054	0.57064	0.69318	0.654448	0.661541	0.632919	0.771065	0.682631	-0.111991
cg07895203	chr4	169786464	169786465	-	0.022	0.747753	0.606742	0.760236	0.577076	0.628973	0.664156	0.736937	0.760401	0.789195	0.769026	0.771699	0.765451	-0.101295
cg07953201	chr1	245851802	245851803	+	0.006	0.316686	0.269276	0.306953	0.189602	0.152474	0.246998	0.388711	0.311526	0.409349	0.315296	0.341815	0.353339	-0.106341
cg07967632	chr15	101601131	101601132	-	0.045	0.647274	0.69176	0.833412	0.693607	0.753232	0.723857	0.77933	0.755503	0.94977	0.786076	0.855197	0.825175	-0.101319
cg07978099	chr16	83986941	83986942	+	0.019	0.16112	0.224288	0.43923	0.406408	0.370054	0.32022	0.526823	0.442576	0.420649	0.422892	0.470939	0.456776	-0.136556
cg08055994	chr2	109190922	109190923	+	0.026	0.791682	0.707005	0.75785	0.700554	0.764432	0.744305	0.875196	0.877578	0.896299	0.894385	0.728356	0.854363	-0.110058
cg08072862	chr12	113587240	113587241	+	0.01	0.253501	0.407567	0.301409	0.40793	0.279946	0.33007	0.430105	0.477636	0.399193	0.483642	0.557123	0.46954	-0.139469
cg08089041	chr12	751692	751693	+	0.045	0.344539	0.312618	0.25255	0.22041	0.381763	0.302376	0.342001	0.408635	0.550659	0.410708	0.314863	0.405373	-0.102997
cg08094206	chr6	30122523	30122524	+	0.017	0.376201	0.496984	0.366321	0.494416	0.495947	0.445974	0.465486	0.555712	0.671182	0.542687	0.623061	0.571626	-0.125652
cg08104960	chr17	807555	807556	+	0.019	0.350469	0.56104	0.654395	0.11226	0.414785	0.41859	0.548382	0.719266	0.955167	0.842922	0.591396	0.731427	-0.312837
cg08106279	chr1	2060014	2060015	-	0	0.566194	0.554907	0.585745	0.517535	0.566845	0.558245	0.699364	0.668551	0.66066	0.667631	0.612665	0.661774	-0.103529
cg08157323	chr14	105688914	105688915	+	0	0.567047	0.764744	0.758655	0.701698	0.757181	0.709865	0.858612	0.843004	0.78854	0.791383	0.805722	0.817452	-0.107587
cg08259413	chr16	22959819	22959820	-	0.017	0.361614	0.284142	0.383465	0.182389	0.25455	0.293232	0.401714	0.389866	0.35283	0.357647	0.469825	0.394376	-0.101144
cg08271366	chr16	82816457	82816458	+	0.033	0.689284	0.524967	0.695233	0.556188	0.61167	0.615468	0.657153	0.692211	0.745899	0.685218	0.797102	0.715516	-0.100048
cg08273957	chr14	29227941	29227942	-	0.021	0.0646036	0.0768135	0.157679	0.0944383	0.0712602	0.092959	0.264988	0.206987	0.283415	0.15502	0.0860705	0.199296	-0.106337
cg08324703	chr10	679514	679515	+	0.047	0.396237	0.420174	0.617879	0.383628	0.514309	0.466446	0.546732	0.549215	0.75665	0.548538	0.582689	0.596765	-0.130319
cg08330690	chr17	33760293	33760294	-	0.032	0.0292998	0.118076	0.102342	0.164554	0.249983	0.132851	0.34743	0.244283	0.390811	0.237517	0.11553	0.267115	-0.134264
cg08331313	chr5	151066460	151066461	-	0.017	0.222849	0.127637	0.264449	0.114695	0.157805	0.177487	0.307679	0.315766	0.370101	0.31652	0.176231	0.29726	-0.119773
cg08364137	chr7	156400990	156400991	+	0.012	0.31602	0.254132	0.406888	0.418319	0.338867	0.346845	0.516383	0.485264	0.545088	0.474876	0.392322	0.482787	-0.135942
cg08381046	chr5	112294315	112294316	+	0.014	0.564608	0.490015	0.649513	0.544722	0.533511	0.556474	0.648496	0.626268	0.675677	0.63422	0.744054	0.665743	-0.109269
cg08384999	chrX	40004346	40004347	-	0.003	0.678121	0.623545	0.678224	0.568333	0.619489	0.633542	0.732117	0.725475	0.792366	0.728923	0.732432	0.742262	-0.10872
cg08385995	chr16	513010	513011	-	0.02	0.673994	0.949025	0.871313	0.771478	0.948814	0.842925	0.948267	0.950461	0.962434	0.948944	0.951266	0.952274	-0.10935
cg08395793	chr16	858205	858206	-	0.012	0.175497	0.443877	0.432816	0.193181	0.267295	0.302533	0.513252	0.448949	0.464853	0.479776	0.418804	0.465127	-0.162594
cg08407014	chr19	2541104	2541105	-	0.018	0.733017	0.621545	0.746664	0.418516	0.589352	0.621819	0.758961	0.72119	0.884694	0.755009	0.739506	0.771872	-0.150053
cg08424184	chr1	36043633	36043634	-	0.018	0.601473	0.487079	0.606673	0.358121	0.543775	0.519424	0.645616	0.675233	0.821177	0.72747	0.562191	0.686337	-0.166913
cg08425482	chr7	143747422	143747423	+	0.042	0.535015	0.758374	0.854935	0.630215	0.730318	0.701771	0.821873	0.789251	0.871777	0.785384	0.851708	0.823999	-0.122227
cg08464009	chr12	123535067	123535068	+	0.045	0.754255	0.644361	0.881379	0.622712	0.713714	0.723284	0.777018	0.793493	0.834942	0.83063	0.942962	0.835809	-0.112525
cg08468599	chr1	2182126	2182127	+	0.028	0.739242	0.623318	0.745688	0.539624	0.660755	0.661726	0.710648	0.721655	0.843562	0.772198	0.830726	0.775758	-0.114032
cg08476511	chr6	168435923	168435924	-	0.022	0.325821	0.26662	0.136546	0.131104	0.240217	0.220061	0.385009	0.34708	0.306275	0.372339	0.233442	0.328829	-0.108768
cg08477687	chr1	566570	566571	+	0.022	0.161358	0.181622	0.200745	0.32954	0.240432	0.222739	0.412791	0.350789	0.621641	0.348207	0.209799	0.388645	-0.165906
cg08510234	chr17	738869	738870	-	0.029	0.684718	0.50286	0.671276	0.410387	0.551562	0.56416	0.683413	0.637909	0.729699	0.628829	0.801788	0.696328	-0.132167
cg08521684	chr3	195488725	195488726	+	0.019	0.265293	0.388923	0.412898	0.230784	0.195604	0.2987	0.45944	0.343041	0.594342	0.391766	0.46531	0.45078	-0.152079
cg08529295	chr1	245132782	245132783	+	0.019	0.187277	0.33443	0.388082	0.115713	0.244969	0.254094	0.387826	0.308113	0.531806	0.427076	0.372181	0.405401	-0.151306
cg08535474	chr17	35149318	35149319	+	0.019	0.139906	0.204072	0.341718	0.201085	0.184088	0.214174	0.376243	0.300701	0.417038	0.314515	0.339201	0.34954	-0.135366
cg08600430	chr13	112709256	112709257	+	0.02	0.394428	0.317209	0.44294	0.318911	0.3066	0.356018	0.455147	0.455429	0.624769	0.422438	0.405953	0.472747	-0.11673
cg08604594	chr10	33798231	33798232	+	0.044	0.307166	0.168026	0.386133	0.0874138	0.173845	0.224517	0.366361	0.328144	0.414388	0.355452	0.241092	0.341087	-0.116571
cg08624648	chr6	31651029	31651030	-	0.019	0.146309	0.0548885	0.0609936	0.0357509	0.12313	0.0842143	0.195922	0.212329	0.195435	0.309545	0.0641496	0.195476	-0.111262
cg08640619	chr1	157989520	157989521	-	0.033	0.827174	0.639724	0.783794	0.53247	0.669737	0.69058	0.803524	0.763559	0.877306	0.805482	0.809021	0.811778	-0.121199
cg08690999	chr5	92923396	92923397	-	0.022	0.578023	0.428794	0.650183	0.520375	0.638172	0.563109	0.722582	0.620582	0.713826	0.635043	0.670399	0.672487	-0.109377
cg08695113	chr10	74842425	74842426	-	0.025	0.454948	0.439157	0.427989	0.565345	0.533424	0.484172	0.642241	0.535218	0.563744	0.52954	0.710209	0.596191	-0.112018
cg08736088	chr4	147866520	147866521	-	0.01	0.569474	0.618554	0.679975	0.533039	0.611842	0.602577	0.662135	0.691063	0.833788	0.717445	0.679988	0.716884	-0.114307
cg08780680	chr13	24640963	24640964	+	0.007	0.715211	0.555639	0.635939	0.674208	0.625656	0.641331	0.696342	0.761302	0.734754	0.735091	0.83092	0.751682	-0.110351
cg08787791	chr13	43355737	43355738	+	0.027	0.661925	0.684607	0.847618	0.695024	0.637635	0.705362	0.774977	0.783729	0.896783	0.778642	0.821051	0.811036	-0.105675
cg08800878	chr2	73152809	73152810	-	0.009	0.0621447	0.0738385	0.194586	0.06681	0.0680133	0.0930786	0.205474	0.260578	0.612757	0.245461	0.076592	0.280172	-0.187094
cg08808042	chr16	88053104	88053105	-	0.039	0.343792	0.569146	0.713269	0.689396	0.640465	0.591214	0.868816	0.789535	0.628067	0.772272	0.689653	0.749669	-0.158455
cg08840441	chr19	19748461	19748462	-	0.009	0.522774	0.401864	0.622307	0.483099	0.465085	0.499026	0.564739	0.604976	0.688584	0.632265	0.707749	0.639663	-0.140637
cg08852741	chr7	20830105	20830106	+	0.031	0.229447	0.339219	0.482689	0.395596	0.299239	0.349238	0.484549	0.45925	0.539853	0.467582	0.366233	0.463494	-0.114256
cg08859406	chr5	147699718	147699719	-	0.048	0.151011	0.327082	0.413538	0.35493	0.206125	0.290537	0.498922	0.34389	0.346619	0.381414	0.494399	0.413049	-0.122512
cg08861369	chr16	85671714	85671715	+	0.006	0.527446	0.525916	0.508496	0.577915	0.535075	0.53497	0.577042	0.847732	0.87575	0.875425	0.578353	0.75086	-0.215891
cg08878372	chr1	24477910	24477911	-	0.005	0.169167	0.268795	0.277023	0.343858	0.24634	0.261036	0.293684	0.42399	0.544288	0.379796	0.355764	0.399504	-0.138468
cg08886695	chr4	3369023	3369024	-	0.003	0.756971	0.83122	0.776936	0.832043	0.738957	0.787225	0.961445	0.90714	0.934706	0.924854	0.863656	0.91836	-0.131135
cg08900409	chr19	18475669	18475670	-	0.047	0.549686	0.439846	0.555204	0.24142	0.450075	0.447246	0.497448	0.503825	0.598862	0.56315	0.601107	0.552878	-0.105632
cg08903619	chr13	53508092	53508093	-	0.041	0.750697	0.805621	0.940284	0.561303	0.84125	0.779831	0.896979	0.816847	0.971034	0.887471	0.951727	0.904812	-0.124981
cg09050832	chr8	1365175	1365176	-	0.006	0.625861	0.58723	0.663701	0.371698	0.242841	0.498266	0.629987	0.700987	0.941607	0.770479	0.749909	0.758594	-0.260327
cg09061733	chr11	57364841	57364842	+	0.002	0.645162	0.576877	0.640781	0.427678	0.546034	0.567307	0.653181	0.665482	0.669392	0.645978	0.71862	0.670531	-0.103224
cg09065629	chr16	1709722	1709723	+	0.029	0.497451	0.662554	0.74174	0.473345	0.571943	0.589407	0.745232	0.672536	0.724531	0.697841	0.737704	0.715569	-0.126162
cg09095892	chr10	91597207	91597208	-	0.003	0.102924	0.124992	0.137739	0.121779	0.0957636	0.116639	0.226952	0.207128	0.252053	0.19576	0.289213	0.234221	-0.117582
cg09120395	chr16	70745992	70745993	+	0.03	0.537323	0.43753	0.522747	0.318955	0.501293	0.46357	0.528021	0.557075	0.680915	0.549537	0.504336	0.563977	-0.100407
cg09133032	chr11	640094	640095	+	0.04	0.191008	0.304338	0.209006	0.043225	0.353812	0.220278	0.379883	0.313405	0.337121	0.332883	0.264622	0.325583	-0.105305
cg09143801	chr1	151105049	151105050	-	0.029	0.524163	0.399531	0.563692	0.408775	0.49424	0.47808	0.572155	0.592084	0.708167	0.656665	0.493328	0.60448	-0.1264
cg09166085	chr5	102898648	102898649	+	0.004	0.120618	0.110985	0.110605	0.0862062	0.0571729	0.0971174	0.231511	0.217638	0.159591	0.233331	0.314297	0.231274	-0.134156
cg09179916	chr5	38445834	38445835	-	0.033	0.428366	0.57422	0.754264	0.627196	0.540452	0.5849	0.696872	0.676492	0.830715	0.672638	0.768824	0.729108	-0.144209
cg09198200	chr2	208123481	208123482	-	0.015	0.344904	0.305462	0.487176	0.338829	0.394589	0.374192	0.479294	0.48541	0.49915	0.464475	0.57743	0.501152	-0.12696
cg09266979	chr1	22777744	22777745	+	0.003	0.64668	0.759669	0.748469	0.639624	0.742629	0.707414	0.875106	0.796215	0.842271	0.815531	0.79309	0.824443	-0.117028
cg09462350	chr2	237489273	237489274	+	0.048	0.69519	0.512277	0.684867	0.921837	0.633329	0.6895	0.808868	0.849185	0.891433	0.821264	0.778036	0.829757	-0.140257
cg09468836	chr19	55889611	55889612	-	0.037	0.249868	0.27043	0.454938	0.176718	0.326713	0.295733	0.372688	0.404495	0.530414	0.389091	0.38758	0.416854	-0.12112
cg09483067	chr12	6451298	6451299	+	0.05	0.376082	0.291839	0.473894	0.166175	0.407533	0.343105	0.389848	0.451546	0.55794	0.425886	0.482358	0.461516	-0.118411
cg09577511	chr12	50349173	50349174	+	0.008	0.317596	0.331534	0.374213	0.342414	0.220836	0.317319	0.342401	0.418241	0.596973	0.390412	0.378764	0.425358	-0.10804
cg09615821	chr16	70749564	70749565	-	0.007	0.472937	0.398117	0.551261	0.364775	0.445734	0.446565	0.531306	0.538474	0.624297	0.579691	0.575407	0.569835	-0.12327
cg09630706	chr7	229695	229696	-	0.004	0.499935	0.445424	0.454997	0.447085	0.540591	0.477606	0.564687	0.59589	0.690342	0.669565	0.593677	0.622832	-0.145226
cg09755872	chr7	23245557	23245558	-	0.018	0.514822	0.475491	0.534493	0.344397	0.525535	0.478948	0.603926	0.617275	0.633831	0.577299	0.497544	0.585975	-0.107027
cg09764807	chr10	43820676	43820677	+	0.015	0.593479	0.754831	0.818953	0.762673	0.703781	0.726743	0.799613	0.820131	0.882369	0.789577	0.915197	0.841378	-0.114634
cg09791440	chr1	19048903	19048904	+	0.038	0.19167	0.322748	0.465927	0.408411	0.29709	0.337169	0.418524	0.410842	0.50723	0.385651	0.477206	0.439891	-0.102722
cg09810089	chr1	211652688	211652689	+	0.004	0.537604	0.643041	0.635357	0.61072	0.542117	0.593768	0.694196	0.757009	0.744458	0.703884	0.668402	0.71359	-0.119822
cg09817283	chr7	2653702	2653703	+	0.006	0.358801	0.311688	0.464685	0.330602	0.394048	0.371965	0.46448	0.533495	0.543144	0.558498	0.576102	0.535144	-0.163179
cg09831875	chr12	124907162	124907163	-	0.013	0.526089	0.436587	0.55629	0.327903	0.462914	0.461957	0.603084	0.553633	0.652966	0.554653	0.579437	0.588755	-0.126798
cg09842946	chr7	20829502	20829503	-	0.043	0.119945	0.227118	0.611443	0.476963	0.219534	0.331001	0.604101	0.458228	0.834003	0.577538	0.38616	0.572006	-0.241005
cg09895920	chr1	153941186	153941187	-	0.037	0.384669	0.196537	0.394174	0.208462	0.377651	0.312299	0.375164	0.379846	0.643874	0.449749	0.403643	0.450455	-0.138157
cg09941208	chr1	45308248	45308249	+	0.013	0.581772	0.612076	0.755925	0.561192	0.62183	0.626559	0.701489	0.736812	0.905463	0.781869	0.686793	0.762485	-0.135926
cg09955645	chr10	531098	531099	+	0	0.435886	0.474114	0.477492	0.31632	0.448529	0.430468	0.481742	0.533745	0.587375	0.51603	0.546157	0.53301	-0.102542
cg09958560	chr10	114571695	114571696	+	0.004	0.712927	0.571925	0.710407	0.506178	0.582132	0.616714	0.713998	0.711112	0.822089	0.742249	0.738714	0.745632	-0.128919
cg09966204	chr13	109741117	109741118	+	0.038	0.420466	0.656552	0.767966	0.685396	0.59533	0.625142	0.775762	0.725438	0.774415	0.673583	0.781096	0.746059	-0.120917
cg10022155	chr11	108464931	108464932	-	0.044	0.71587	0.529207	0.78511	0.568595	0.576223	0.635001	0.721132	0.717445	0.732908	0.708572	0.815014	0.739014	-0.104013
cg10036920	chr12	133180045	133180046	-	0.016	0.55555	0.566654	0.700174	0.588205	0.567951	0.595707	0.762105	0.6805	0.696224	0.679445	0.685886	0.700832	-0.105125
cg10038185	chr1	68517273	68517274	+	0.004	0.345748	0.496977	0.41166	0.484422	0.485203	0.444802	0.527219	0.557696	0.495917	0.547689	0.686995	0.563103	-0.118302
cg10045446	chr7	32530734	32530735	-	0.006	0.215968	0.359528	0.369345	0.15806	0.35892	0.292364	0.390646	0.364236	0.518668	0.387982	0.395315	0.411369	-0.119005
cg10050410	chr10	4035293	4035294	-	0	0.622989	0.745383	0.747647	0.493816	0.745119	0.670991	0.761358	0.753116	0.952913	0.790301	0.7568	0.802897	-0.131907
cg10079374	chr7	158750417	158750418	+	0.035	0.530996	0.523314	0.59974	0.699364	0.516074	0.573898	0.639966	0.670525	0.715686	0.638487	0.751146	0.683162	-0.109264
cg10123421	chr19	11785062	11785063	+	0.007	0.244515	0.19156	0.177282	0.111535	0.110517	0.167082	0.350651	0.316162	0.43327	0.318489	0.218397	0.327394	-0.160312
cg10135260	chr4	1523074	1523075	+	0.04	0.0253163	0.237817	0.128001	0.0393766	0.0554795	0.0971979	0.213645	0.175881	0.386571	0.147076	0.185839	0.221802	-0.124604
cg10143067	chr10	118892423	118892424	-	0.031	0.0436711	0.323727	0.378556	0.384529	0.302995	0.286696	0.651196	0.467025	0.276957	0.459661	0.435161	0.458	-0.171304
cg10148932	chr19	39967363	39967364	+	0.007	0.816104	0.783878	0.832631	0.805201	0.818179	0.811199	0.571226	0.670375	0.508302	0.618701	0.55311	0.584343	0.226856
cg10154826	chr6	17600994	17600995	+	0.003	0.155217	0.18725	0.213519	0.170427	0.186614	0.182605	0.466788	0.393825	0.416013	0.370318	0.428208	0.41503	-0.232425
cg10158997	chr6	31734106	31734107	-	0.006	0.64217	0.637307	0.743241	0.722916	0.481784	0.645484	0.723791	0.751553	0.783607	0.775307	0.849375	0.776727	-0.131243
cg10166044	chr17	62341026	62341027	+	0.031	0.193268	0.128299	0.200149	0.356722	0.1349	0.202667	0.288565	0.342541	0.379494	0.249931	0.342136	0.320533	-0.117866
cg10224600	chr17	43975063	43975064	+	0.029	0.320868	0.356085	0.432168	0.14332	0.388065	0.328101	0.49074	0.440497	0.526111	0.471886	0.334828	0.452812	-0.124711
cg10292154	chr16	27461445	27461446	-	0.013	0.138545	0.317231	0.48268	0.242338	0.377093	0.311577	0.478585	0.433026	0.56393	0.459576	0.484823	0.483988	-0.172411
cg10327440	chr1	227177885	227177886	-	0.047	0.0366569	0.0505594	0.571662	0.938296	0.0366745	0.32677	0.571468	0.786027	0.93792	0.732638	0.875678	0.780746	-0.453976
cg10331424	chr16	70696450	70696451	+	0.019	0.602785	0.510323	0.657548	0.348814	0.543698	0.532633	0.626368	0.640257	0.797086	0.672703	0.623058	0.671894	-0.139261
cg10400707	chr1	160369840	160369841	+	0.014	0.275529	0.21113	0.381859	0.189346	0.219652	0.255503	0.325882	0.374138	0.493059	0.349833	0.428165	0.394215	-0.138712
cg10418812	chr7	1850329	1850330	+	0.017	0.64422	0.596592	0.662586	0.743312	0.5707	0.643482	0.719487	0.712139	0.865958	0.747977	0.713849	0.751882	-0.1084
cg10437265	chr15	77819839	77819840	-	0.037	0.706172	0.575362	0.635451	0.391349	0.622722	0.586211	0.7083	0.651287	0.767625	0.66925	0.641025	0.687497	-0.101286
cg10472320	chr16	72892765	72892766	+	0.021	0.659936	0.508332	0.638099	0.485208	0.548299	0.567975	0.628512	0.662783	0.69483	0.649777	0.725057	0.672192	-0.104217
cg10511988	chr10	118891706	118891707	+	0.011	0.27906	0.500902	0.505203	0.508033	0.451951	0.44903	0.733792	0.598135	0.465634	0.555682	0.558773	0.582403	-0.133373
cg10512769	chr1	211675356	211675357	+	0.044	0.599096	0.641001	0.661761	0.660855	0.662008	0.644944	0.640978	0.575854	0.435137	0.512705	0.473201	0.527575	0.117369
cg10533161	chr13	99174312	99174313	+	0.037	0.435224	0.414337	0.569601	0.681131	0.403909	0.50084	0.632491	0.613874	0.699193	0.689359	0.538955	0.634775	-0.133934
cg10560079	chr2	191398806	191398807	-	0.003	0.105297	0.211546	0.162522	0.0951903	0.183396	0.15159	0.360739	0.277869	0.288048	0.23	0.204823	0.272296	-0.120705
cg10565187	chr19	1468943	1468944	+	0.03	0.461667	0.530221	0.619529	0.344739	0.628454	0.516922	0.588469	0.598612	0.764372	0.634712	0.664753	0.650183	-0.133261
cg10576992	chr4	119662530	119662531	+	0.003	0.381981	0.425834	0.510776	0.371291	0.455723	0.429121	0.590593	0.508835	0.607559	0.523936	0.54602	0.555389	-0.126268
cg10606029	chr5	37952598	37952599	+	0.025	0.854038	0.917264	0.680104	0.624543	0.85019	0.785228	0.923457	0.85361	0.942838	0.906597	0.896476	0.904595	-0.119368
cg10608596	chr19	11785125	11785126	-	0.007	0.185621	0.123742	0.0915453	0.0631259	0.0755111	0.107909	0.221159	0.166772	0.339295	0.225913	0.177554	0.226139	-0.11823
cg10609310	chr8	38722935	38722936	+	0.042	0.286025	0.282099	0.448812	0.131513	0.334564	0.296603	0.361034	0.383746	0.466146	0.358347	0.465493	0.406953	-0.110351
cg10639368	chr2	240241218	240241219	-	0.037	0.682108	0.655122	0.585323	0.388355	0.485132	0.559208	0.654492	0.615222	0.853445	0.628133	0.750983	0.700455	-0.141247
cg10674575	chr17	21416258	21416259	-	0.039	0.690873	0.6981	0.681085	0.813778	0.751932	0.727154	0.649456	0.67781	0.498071	0.595302	0.604259	0.60498	0.122174
cg10688297	chr7	2606824	2606825	-	0.033	0.336282	0.567191	0.560834	0.345312	0.497747	0.461473	0.522721	0.546066	0.85926	0.574692	0.580315	0.616611	-0.155138
cg10719604	chr11	117748486	117748487	+	0.022	0.620453	0.55311	0.711281	0.572288	0.653651	0.622157	0.759161	0.733503	0.840861	0.724326	0.63326	0.738222	-0.116066
cg10750828	chr14	105939027	105939028	+	0.013	0.775126	0.601694	0.723004	0.530916	0.658414	0.657831	0.760829	0.760259	0.847085	0.799149	0.767125	0.786889	-0.129059
cg10753889	chr11	116706520	116706521	+	0.027	0.162317	0.110175	0.14392	0.121801	0.164826	0.140608	0.260255	0.275419	0.390778	0.254426	0.0757338	0.251322	-0.110715
cg10765992	chr15	99722217	99722218	-	0.01	0.673569	0.563175	0.74397	0.483449	0.598223	0.612477	0.762775	0.728677	0.795508	0.74287	0.788401	0.763646	-0.151169
cg10776230	chr1	245851226	245851227	+	0	0.501955	0.483003	0.521659	0.470994	0.405967	0.476715	0.587002	0.563578	0.594687	0.5423	0.621584	0.58183	-0.105115
cg10812016	chr7	155385272	155385273	-	0.039	0.529623	0.584814	0.75542	0.73052	0.643012	0.648678	0.757651	0.707498	0.796598	0.697015	0.7925	0.750252	-0.101574
cg10831901	chr20	5485294	5485295	+	0.018	0.413299	0.273005	0.241197	0.335369	0.138658	0.280306	0.391577	0.376124	0.445663	0.352225	0.451824	0.403483	-0.123177
cg10842515	chr17	43325167	43325168	+	0.004	0.213916	0.265076	0.218686	0.15863	0.159277	0.203117	0.34279	0.28324	0.361651	0.296754	0.322202	0.321327	-0.11821
cg10873171	chr7	44145333	44145334	+	0.009	0.510256	0.370025	0.565676	0.389632	0.467249	0.460568	0.549495	0.620648	0.633782	0.587145	0.537946	0.585803	-0.125236
cg10881225	chr2	9984929	9984930	-	0.043	0.585703	0.646184	0.786819	0.534707	0.627275	0.636138	0.695385	0.713348	0.785702	0.720275	0.888806	0.760703	-0.124566
cg10927178	chr20	56883965	56883966	+	0	0.0792769	0.138252	0.146253	0.166957	0.0827047	0.122689	0.501016	0.218971	0.173789	0.283675	0.323623	0.300215	-0.177526
cg10927841	chr2	26407743	26407744	+	0.016	0.117567	0.161436	0.236953	0.0209206	0.132441	0.133864	0.232328	0.184081	0.324041	0.216515	0.260988	0.243591	-0.109727
cg11031660	chr14	83852380	83852381	-	0.013	0.735975	0.826528	0.76744	0.739767	0.428728	0.699688	0.842453	0.827386	0.783876	0.8073	0.864762	0.825155	-0.125468
cg11100157	chr5	16738049	16738050	+	0.001	0.641924	0.551266	0.44838	0.571016	0.616827	0.565882	0.672335	0.657297	0.683436	0.689349	0.642678	0.669019	-0.103136
cg11139090	chr5	176294068	176294069	+	0.003	0.430106	0.252099	0.414354	0.373231	0.401054	0.374169	0.443142	0.451506	0.48613	0.501951	0.491214	0.474789	-0.10062
cg11212451	chr5	173198508	173198509	+	0.02	0.131493	0.295254	0.359533	0.176956	0.251539	0.242955	0.375869	0.296488	0.356588	0.305565	0.42733	0.352368	-0.109413
cg11224984	chr1	2203045	2203046	+	0.005	0.659712	0.584453	0.685564	0.497004	0.561069	0.59756	0.668487	0.678714	0.761298	0.751625	0.715739	0.715173	-0.117612
cg11256152	chr8	141359786	141359787	+	0.008	0.681049	0.602959	0.76222	0.629426	0.55346	0.645823	0.851298	0.770147	0.800444	0.745899	0.862073	0.805972	-0.16015
cg11287055	chr21	38630234	38630235	+	0.012	0.255384	0.342095	0.0810862	0.0108063	0.0546933	0.148813	0.393052	0.328336	0.337288	0.339127	0.407817	0.361124	-0.212311
cg11312353	chr13	114202861	114202862	-	0.021	0.364622	0.298559	0.518661	0.314203	0.383729	0.375955	0.389841	0.473049	0.579963	0.538856	0.529359	0.502214	-0.126259
cg11323506	chr5	80529135	80529136	+	0.026	0.0648285	0.0140286	0.283739	0.0524084	0.136709	0.110343	0.166739	0.207083	0.280262	0.220498	0.393754	0.253667	-0.143324
cg11324116	chr11	57414908	57414909	+	0.05	0.435866	0.326131	0.435429	0.163114	0.383348	0.348777	0.481239	0.472773	0.633644	0.518908	0.332285	0.48777	-0.138992
cg11335335	chr11	637885	637886	+	0.011	0.234231	0.344406	0.402227	0.249844	0.345293	0.3152	0.468965	0.409658	0.43438	0.389848	0.451786	0.430927	-0.115727
cg11346248	chr17	33759929	33759930	-	0.017	0.0752515	0.137933	0.115281	0.226442	0.214312	0.153844	0.31289	0.231578	0.302018	0.229084	0.212668	0.257648	-0.103804
cg11347582	chr6	168502341	168502342	+	0.008	0.262626	0.0237066	0.0807784	0.0382868	0.0235035	0.0857802	0.320546	0.185596	0.190568	0.215676	0.177186	0.217914	-0.132134
cg11399546	chr1	226730561	226730562	-	0.043	0.448824	0.408648	0.604237	0.535345	0.445876	0.488586	0.597905	0.554638	0.585612	0.510712	0.7269	0.595153	-0.106567
cg11494091	chr17	61959527	61959528	+	0.009	0.791781	0.857782	0.895858	0.838639	0.851145	0.847041	0.724586	0.755344	0.698339	0.717568	0.701119	0.719391	0.12765
cg11498156	chr10	102890145	102890146	+	0.049	0.711267	0.490829	0.679862	0.499548	0.544802	0.585262	0.642282	0.685832	0.784651	0.723484	0.674258	0.702101	-0.11684
cg11536851	chr7	4832359	4832360	+	0.022	0.504165	0.317253	0.407567	0.168888	0.276946	0.334964	0.444498	0.431434	0.524749	0.434275	0.539998	0.474991	-0.140027
cg11540476	chr6	31651249	31651250	-	0.005	0.29476	0.16629	0.222117	0.0992931	0.253774	0.207247	0.383339	0.383891	0.356139	0.427771	0.254793	0.361187	-0.15394
cg11553687	chr11	70959713	70959714	-	0.046	0.60136	0.506131	0.727665	0.492047	0.583991	0.582239	0.622723	0.654974	0.787393	0.671935	0.73469	0.694343	-0.112105
cg11554566	chr21	47398596	47398597	+	0.02	0.645986	0.501039	0.710606	0.677812	0.648366	0.636762	0.700689	0.719047	0.871515	0.749219	0.673461	0.742786	-0.106025
cg11558551	chr19	17516442	17516443	+	0.03	0.549634	0.486751	0.63491	0.467999	0.506367	0.529132	0.461603	0.457695	0.364533	0.397534	0.405721	0.417417	0.111715
cg11598935	chr20	55837619	55837620	+	0.025	0.626624	0.449918	0.577	0.460224	0.535274	0.529808	0.629303	0.62666	0.706402	0.661803	0.572292	0.639292	-0.109484
cg11608150	chr5	135415948	135415949	-	0	0.447386	0.41522	0.426547	0.4219	0.021858	0.346582	0.45772	0.455696	0.464907	0.451557	0.481841	0.462344	-0.115762
cg11617144	chr8	145729772	145729773	-	0.004	0.819313	0.767698	0.793372	0.611068	0.815376	0.761365	0.86697	0.798107	0.915475	0.893401	0.89624	0.874039	-0.112673
cg11648594	chr1	1566860	1566861	+	0.039	0.216424	0.203929	0.365005	0.147564	0.237385	0.234061	0.265796	0.302907	0.440894	0.361854	0.334628	0.341216	-0.107154
cg11650763	chr5	92930530	92930531	-	0.011	0.660248	0.681748	0.767965	0.565139	0.719219	0.678864	0.769936	0.757282	0.816675	0.822205	0.744596	0.782139	-0.103275
cg11669516	chr2	217501092	217501093	-	0.026	0.420909	0.440061	0.546978	0.280844	0.460754	0.429909	0.521559	0.531263	0.642703	0.512442	0.493993	0.540392	-0.110483
cg11678206	chr10	135099965	135099966	+	0.013	0.757924	0.750161	0.698304	0.505174	0.748405	0.691993	0.806675	0.819363	0.826841	0.841278	0.743645	0.80756	-0.115567
cg11693508	chr17	37793320	37793321	-	0.009	0.106348	0.252455	0.0892551	0.0804094	0.161215	0.137937	0.283959	0.245807	0.296017	0.257736	0.196958	0.256095	-0.118159
cg11750112	chr1	64938742	64938743	-	0.034	0.718553	0.587852	0.861142	0.523152	0.74085	0.68631	0.742341	0.815901	0.883115	0.84264	0.909636	0.838726	-0.152416
cg11816734	chr5	3962434	3962435	-	0.029	0.929495	0.674185	0.626456	0.578412	0.697823	0.701274	0.705426	0.894925	0.946745	0.903641	0.911805	0.872509	-0.171234
cg11827453	chr9	140917413	140917414	-	0.027	0.143055	0.124752	0.183263	0.0788898	0.151661	0.136324	0.111965	0.227022	0.421831	0.249155	0.210183	0.244031	-0.107707
cg11829608	chr1	207224549	207224550	-	0.038	0.169548	0.328337	0.250107	0.179079	0.115576	0.208529	0.425738	0.272446	0.364004	0.247246	0.272787	0.316444	-0.107915
cg11836236	chr10	118893224	118893225	-	0.048	0.114317	0.279886	0.313467	0.335799	0.264964	0.261686	0.496227	0.382988	0.256574	0.350243	0.341311	0.365469	-0.103782
cg11846236	chr3	48632568	48632569	+	0.026	0.326317	0.157306	0.29801	0.115131	0.14375	0.208103	0.369914	0.278573	0.266075	0.274527	0.398937	0.317605	-0.109503
cg11869862	chr15	37399798	37399799	-	0.027	0.504853	0.474755	0.519664	0.38547	0.506281	0.478205	0.69908	0.608536	0.575769	0.630829	0.443478	0.591538	-0.113334
cg11890239	chr8	103541014	103541015	-	0.004	0.304165	0.218431	0.213845	0.131441	0.208211	0.215219	0.316073	0.33281	0.417274	0.351803	0.300435	0.343679	-0.12846
cg11904906	chr2	239140032	239140033	-	0.022	0.0131123	0.028559	0.0174348	0.0417746	0.0233291	0.024842	0.347297	0.164351	0.221173	0.165369	0.0177528	0.183189	-0.158347
cg11945929	chr7	158750384	158750385	+	0.013	0.443173	0.396659	0.482856	0.584676	0.396243	0.460721	0.539176	0.547859	0.620242	0.553362	0.668855	0.585899	-0.125178
cg11955878	chr4	165898967	165898968	-	0.012	0.137389	0.371472	0.417574	0.305398	0.390929	0.324552	0.372172	0.512107	0.550892	0.476918	0.557338	0.493885	-0.169333
cg11993350	chr6	32557404	32557405	+	0.025	0.76715	0.779718	0.828213	0.828243	0.76844	0.794353	0.628476	0.701853	0.752886	0.641386	0.567324	0.658385	0.135968
cg12036817	chr11	405846	405847	-	0.015	0.138842	0.272811	0.299118	0.119712	0.241766	0.21445	0.339802	0.28641	0.242367	0.303848	0.443104	0.323106	-0.108657
cg12038696	chr1	36043352	36043353	-	0.006	0.371948	0.358456	0.466693	0.264481	0.367634	0.365842	0.496912	0.507418	0.607425	0.49907	0.3953	0.501225	-0.135383
cg12046314	chr6	38317880	38317881	-	0.05	0.839912	0.622234	0.801094	0.554797	0.693266	0.702261	0.769683	0.794734	0.821441	0.836293	0.843461	0.813123	-0.110862
cg12061113	chr18	77905747	77905748	+	0.009	0.376319	0.33497	0.268777	0.181279	0.366661	0.305601	0.347619	0.461142	0.508056	0.493885	0.512401	0.464621	-0.15902
cg12076350	chr6	31275791	31275792	+	0	0.457362	0.485302	0.498195	0.574971	0.361852	0.475536	0.762628	0.638439	0.642495	0.67884	0.648344	0.674149	-0.198613
cg12079279	chr13	33426337	33426338	+	0.023	0.706286	0.668784	0.827686	0.6311	0.704987	0.707768	0.805613	0.796369	0.760295	0.809918	0.887254	0.81189	-0.104121
cg12082025	chr19	1064218	1064219	-	0.03	0.741018	0.635081	0.760631	0.952999	0.655208	0.748987	0.958072	0.926648	0.81739	0.89591	0.920199	0.903644	-0.154656
cg12152338	chr11	36119923	36119924	+	0.035	0.63634	0.441151	0.676129	0.415501	0.51706	0.537236	0.646191	0.677862	0.683234	0.686893	0.603859	0.659608	-0.122372
cg12192884	chr5	1020109	1020110	-	0.04	0.780358	0.862005	0.76264	0.430671	0.779297	0.722994	0.849742	0.8358	0.881303	0.887488	0.767193	0.844305	-0.121311
cg12193327	chr2	31454631	31454632	+	0.037	0.440612	0.514907	0.532139	0.730104	0.570681	0.557689	0.802094	0.684444	0.686118	0.675729	0.59375	0.688427	-0.130738
cg12220426	chr2	75283271	75283272	-	0.037	0.644799	0.502859	0.675197	0.463172	0.556757	0.568557	0.634115	0.687269	0.730765	0.650329	0.658789	0.672253	-0.103697
cg12310025	chr6	25882481	25882482	+	0.026	0.223575	0.257271	0.225049	0.147703	0.234874	0.217694	0.614137	0.562097	0.196026	0.588538	0.26329	0.444817	-0.227123
cg12334079	chr1	213562740	213562741	-	0.05	0.332145	0.302679	0.479853	0.430436	0.364274	0.381878	0.382652	0.46067	0.540986	0.452083	0.585133	0.484305	-0.102427
cg12363726	chr17	79011542	79011543	-	0.013	0.691982	0.526313	0.624971	0.50017	0.600325	0.588752	0.691171	0.685563	0.734763	0.707454	0.632053	0.690201	-0.101448
cg12412902	chr6	34499504	34499505	-	0.008	0.697923	0.732652	0.738508	0.71384	0.520481	0.680681	0.729262	0.753119	0.853375	0.767923	0.836798	0.788095	-0.107414
cg12477608	chrX	117107923	117107924	+	0.048	0.343433	0.518419	0.589348	0.644051	0.490563	0.517163	0.65018	0.548146	0.702241	0.633871	0.565788	0.620045	-0.102882
cg12535744	chr11	95930450	95930451	-	0.031	0.828169	0.72497	0.882462	0.623894	0.708182	0.753535	0.844109	0.83156	0.911253	0.850481	0.894304	0.866342	-0.112806
cg12572278	chr11	120081259	120081260	+	0.018	0.295367	0.251552	0.510104	0.112236	0.269921	0.287836	0.409306	0.408559	0.519979	0.429043	0.427147	0.438807	-0.150971
cg12580893	chr13	112985499	112985500	+	0.008	0.352207	0.196143	0.21652	0.144275	0.136735	0.209176	0.326975	0.305944	0.310552	0.309298	0.377459	0.326046	-0.11687
cg12605662	chr18	56935199	56935200	-	0.014	0.266674	0.469131	0.606647	0.537741	0.508853	0.477809	0.61601	0.589362	0.689285	0.573307	0.629865	0.619566	-0.141757
cg12608247	chr2	239140369	239140370	+	0.003	0.0704397	0.0937005	0.0822396	0.0936504	0.0851596	0.085038	0.286615	0.204811	0.41473	0.207176	0.0959215	0.241851	-0.156813
cg12639429	chr18	21572622	21572623	-	0.025	0.74883	0.610246	0.77542	0.63683	0.635223	0.68131	0.735484	0.782455	0.847448	0.805309	0.779619	0.790063	-0.108753
cg12642289	chr11	78948859	78948860	+	0.004	0.467031	0.385184	0.512918	0.26464	0.413434	0.408641	0.580382	0.508913	0.625215	0.562485	0.51636	0.558671	-0.150029
cg12750031	chr8	92221717	92221718	+	0.026	0.484331	0.745188	0.862295	0.73008	0.759474	0.716274	0.834121	0.815864	0.858821	0.79011	0.891426	0.838068	-0.121795
cg12756504	chr15	37396672	37396673	-	0.016	0.437599	0.385694	0.443609	0.32046	0.437905	0.405053	0.661657	0.585315	0.587893	0.610539	0.405491	0.570179	-0.165126
cg12798157	chr1	19600719	19600720	+	0.021	0.450444	0.396047	0.408677	0.245876	0.323764	0.364961	0.455379	0.452243	0.548252	0.530712	0.400062	0.477329	-0.112368
cg12798833	chr22	18958832	18958833	-	0.023	0.240897	0.170372	0.226307	0.318896	0.250272	0.241349	0.499257	0.408916	0.491117	0.461419	0.179458	0.408033	-0.166685
cg12803053	chr8	126142264	126142265	-	0.034	0.632618	0.7582	0.792631	0.46899	0.691092	0.668706	0.762306	0.800168	0.812999	0.782807	0.764941	0.784644	-0.115938
cg12829142	chr7	23529999	23530000	+	0	0.389996	0.326473	0.324071	0.124857	0.266097	0.286299	0.419962	0.397086	0.397189	0.402299	0.419943	0.407296	-0.120997
cg12830671	chr10	73335297	73335298	-	0.004	0.714773	0.542123	0.712621	0.542531	0.621703	0.62675	0.766044	0.73776	0.762561	0.746727	0.807757	0.76417	-0.13742
cg12897067	chr5	135418308	135418309	+	0.044	0.139377	0.119002	0.147886	0.117933	0.577119	0.220263	0.620965	0.424027	0.921196	0.395738	0.181496	0.508685	-0.288421
cg13023646	chr4	165898835	165898836	-	0.004	0.126262	0.27503	0.292997	0.313509	0.297896	0.261139	0.350106	0.350502	0.433233	0.404986	0.414519	0.390669	-0.12953
cg13033853	chr9	133814399	133814400	+	0.009	0.043943	0.0444388	0.0387617	0.0343026	0.0363889	0.039567	0.0506019	0.0410857	0.583172	0.0446988	0.0507995	0.154072	-0.114505
cg13045134	chr8	103741780	103741781	+	0.018	0.317639	0.297252	0.514019	0.15095	0.301949	0.316362	0.475741	0.430865	0.586874	0.511401	0.449047	0.490786	-0.174424
cg13130022	chr6	44440494	44440495	+	0.016	0.559746	0.488931	0.605013	0.353673	0.53202	0.507877	0.561368	0.560541	0.704072	0.622012	0.621246	0.613848	-0.105971
cg13144059	chr2	201245077	201245078	+	0.012	0.524917	0.436449	0.493259	0.445403	0.430761	0.466158	0.541968	0.586994	0.644652	0.600891	0.491565	0.573214	-0.107056
cg13163896	chr17	75414571	75414572	+	0.031	0.929577	0.911079	0.912849	0.923773	0.384946	0.812445	0.92911	0.937468	0.920104	0.92867	0.928414	0.928753	-0.116309
cg13170051	chr1	41982392	41982393	+	0.044	0.191726	0.215954	0.36967	0.151509	0.122906	0.210353	0.213989	0.321768	0.380904	0.30874	0.4247	0.33002	-0.119667
cg13191508	chr8	144600686	144600687	+	0.022	0.595811	0.426854	0.571226	0.445749	0.464148	0.500758	0.566257	0.592432	0.695533	0.59837	0.729508	0.63642	-0.135662
cg13195486	chr1	218457882	218457883	-	0.023	0.25524	0.366496	0.312363	0.492223	0.398188	0.364902	0.476622	0.519663	0.447347	0.492361	0.421451	0.471489	-0.106587
cg13219127	chr11	1322131	1322132	+	0.014	0.346789	0.443408	0.496412	0.315945	0.408037	0.402118	0.538469	0.438873	0.624753	0.551317	0.489675	0.528617	-0.126499
cg13225565	chr14	93106414	93106415	-	0.02	0.323671	0.340519	0.349106	0.410874	0.536575	0.392149	0.518462	0.577354	0.482243	0.543845	0.478345	0.52005	-0.127901
cg13264183	chr3	126194992	126194993	-	0.045	0.146377	0.217285	0.297035	0.162327	0.190981	0.202801	0.195276	0.274807	0.504534	0.291547	0.303439	0.313921	-0.111119
cg13282195	chr8	144660772	144660773	-	0.025	0.385915	0.039914	0.0512145	0.0722207	0.0638024	0.122613	0.522649	0.357261	0.323618	0.386343	0.106169	0.339208	-0.216595
cg13287964	chr18	77905751	77905752	+	0	0.535777	0.498563	0.483389	0.395813	0.49624	0.481957	0.54688	0.599571	0.600139	0.59623	0.623599	0.593284	-0.111327
cg13298859	chr7	2551996	2551997	+	0.049	0.696708	0.458876	0.673918	0.474898	0.581543	0.577189	0.618047	0.674774	0.722482	0.673658	0.70015	0.677822	-0.100633
cg13341668	chr3	50359909	50359910	+	0.013	0.412543	0.455973	0.53274	0.339303	0.467399	0.441592	0.517758	0.527511	0.641514	0.541608	0.503673	0.546413	-0.104821
cg13354250	chr6	169558175	169558176	-	0.046	0.351049	0.382655	0.516227	0.379707	0.389232	0.403774	0.444146	0.461226	0.577564	0.450515	0.593251	0.505341	-0.101567
cg13367234	chr1	17253197	17253198	-	0.048	0.817605	0.629555	0.789881	0.592883	0.696467	0.705278	0.785495	0.809372	0.85431	0.833596	0.769565	0.810468	-0.10519
cg13403462	chr20	32256071	32256072	+	0.001	0.419832	0.389525	0.426462	0.25073	0.311942	0.359698	0.534216	0.455082	0.452749	0.444362	0.515959	0.480473	-0.120775
cg13458253	chr10	81937832	81937833	+	0.013	0.505662	0.494145	0.630576	0.510487	0.540414	0.536257	0.704428	0.60159	0.609954	0.602621	0.679896	0.639698	-0.103441
cg13516209	chr6	29855302	29855303	+	0.034	0.121877	0.159611	0.386423	0.33605	0.264215	0.253635	0.235706	0.443979	0.544937	0.447805	0.451684	0.424822	-0.171187
cg13530938	chr2	239140190	239140191	+	0.017	0.0128339	0.01998	0.014182	0.0133366	0.0182941	0.0157253	0.368921	0.168464	0.345867	0.165083	0.0143779	0.212543	-0.196817
cg13537237	chr2	241908681	241908682	-	0.011	0.577446	0.448654	0.639998	0.424043	0.533817	0.524792	0.592997	0.589606	0.648406	0.669394	0.745288	0.649138	-0.124347
cg13541588	chr17	21903945	21903946	+	0.033	0.799478	0.774413	0.927114	0.903323	0.861957	0.853257	0.729359	0.789174	0.701036	0.745355	0.769559	0.746897	0.10636
cg13573746	chr1	41204786	41204787	+	0.05	0.902805	0.730629	0.894638	0.647781	0.480345	0.73124	0.861079	0.877875	0.8422	0.908595	0.897292	0.877408	-0.146169
cg13593391	chr11	132582488	132582489	+	0.037	0.650643	0.668535	0.929924	0.770847	0.690502	0.74209	0.87119	0.859346	0.956225	0.870142	0.794226	0.870226	-0.128135
cg13606025	chr17	68070495	68070496	-	0.001	0.74595	0.580239	0.791054	0.740435	0.654423	0.70242	0.850986	0.812198	0.867085	0.816894	0.82848	0.835129	-0.132709
cg13610307	chr9	140917431	140917432	-	0.02	0.0971899	0.0921578	0.130611	0.0396634	0.125615	0.0970472	0.0671493	0.22333	0.494005	0.262109	0.170351	0.243389	-0.146342
cg13652795	chrX	40000784	40000785	-	0.018	0.66113	0.496481	0.644593	0.45908	0.572584	0.566774	0.663657	0.650198	0.730013	0.679985	0.644957	0.673762	-0.106988
cg13665998	chr5	102898478	102898479	-	0	0.139763	0.100282	0.129086	0.0622958	0.0375488	0.0937953	0.214864	0.230986	0.157327	0.216798	0.347267	0.233448	-0.139653
cg13704680	chr18	77905298	77905299	-	0.005	0.48864	0.43444	0.429231	0.323451	0.457618	0.426676	0.460576	0.567706	0.5773	0.61151	0.630759	0.56957	-0.142894
cg13717446	chr17	62777761	62777762	+	0.043	0.537097	0.473477	0.536817	0.329737	0.479556	0.471337	0.582136	0.593275	0.682454	0.589272	0.441227	0.577673	-0.106336
cg13740929	chr6	31651291	31651292	+	0.008	0.592044	0.471602	0.602278	0.419643	0.550677	0.527249	0.65656	0.643238	0.637551	0.643413	0.593114	0.634775	-0.107527
cg13744481	chr3	8308781	8308782	-	0.003	0.528685	0.44291	0.593322	0.434478	0.540669	0.508013	0.60222	0.578229	0.7373	0.671022	0.6174	0.641234	-0.133222
cg13790353	chr11	85565559	85565560	+	0.02	0.211201	0.413566	0.514754	0.317386	0.406338	0.372649	0.501984	0.478462	0.621285	0.473748	0.487057	0.512507	-0.139858
cg13805951	chr14	105948819	105948820	+	0.047	0.731336	0.662271	0.796748	0.409711	0.650618	0.650137	0.710953	0.707834	0.93062	0.770076	0.839406	0.791778	-0.141641
cg13851508	chr2	66805939	66805940	+	0.021	0.310645	0.205749	0.275857	0.153358	0.267843	0.242691	0.408839	0.332605	0.389564	0.395894	0.246495	0.354679	-0.111989
cg13878677	chr3	13060915	13060916	+	0.003	0.461551	0.43965	0.559502	0.401907	0.464896	0.465501	0.521465	0.575524	0.621494	0.583876	0.699349	0.600341	-0.13484
cg13892514	chr2	241853394	241853395	-	0	0.568594	0.626199	0.612477	0.458128	0.646309	0.582341	0.662759	0.675752	0.779154	0.678913	0.663233	0.691962	-0.109621
cg13893555	chr9	37574338	37574339	+	0.004	0.663722	0.491267	0.669064	0.580156	0.570855	0.595013	0.786306	0.704704	0.687742	0.688429	0.681087	0.709654	-0.114641
cg13926267	chrX	26576375	26576376	+	0.017	0.465712	0.618911	0.611864	0.53479	0.888459	0.623947	0.892293	0.854264	0.860059	0.891787	0.882399	0.87616	-0.252213
cg13963044	chr9	136335077	136335078	-	0.045	0.568466	0.10303	0.627377	0.436849	0.463404	0.439825	0.640194	0.606697	0.601254	0.571373	0.555339	0.594971	-0.155146
cg13967908	chr9	117159457	117159458	+	0.009	0.415338	0.311882	0.457709	0.279146	0.418851	0.376585	0.45314	0.499689	0.552335	0.478911	0.442749	0.485365	-0.108779
cg13995854	chr7	116764970	116764971	+	0.019	0.399698	0.479098	0.571178	0.449225	0.483774	0.476595	0.626724	0.546005	0.600156	0.555126	0.56909	0.57942	-0.102825
cg14003621	chr13	20693341	20693342	-	0	0.179464	0.185832	0.167317	0.167285	0.29088	0.198156	0.474335	0.328171	0.317434	0.332348	0.368823	0.364222	-0.166067
cg14021133	chr7	20834283	20834284	+	0.05	0.257842	0.363061	0.661715	0.279057	0.206087	0.353552	0.516899	0.486369	0.733817	0.454423	0.505516	0.539405	-0.185852
cg14031365	chr7	20816695	20816696	-	0.039	0.248747	0.370091	0.550761	0.3222	0.32849	0.364058	0.465573	0.487608	0.750973	0.487229	0.40514	0.519304	-0.155247
cg14107256	chr14	49503807	49503808	+	0.02	0.597042	0.527527	0.673117	0.477011	0.565907	0.568121	0.627505	0.663982	0.721468	0.669721	0.694113	0.675358	-0.107237
cg14114546	chr5	77823064	77823065	-	0.039	0.304903	0.198561	0.432781	0.145747	0.363192	0.289037	0.388534	0.374111	0.465789	0.411407	0.390183	0.406005	-0.116968
cg14121987	chr5	37952644	37952645	-	0.029	0.659996	0.695131	0.524218	0.515656	0.738502	0.626701	0.768855	0.666724	0.784839	0.715333	0.736245	0.734399	-0.107699
cg14131536	chr2	98340921	98340922	-	0.027	0.288695	0.427974	0.490483	0.339632	0.305392	0.370435	0.493786	0.410099	0.440541	0.47017	0.675914	0.498102	-0.127667
cg14150907	chr8	142275722	142275723	-	0.017	0.251085	0.186554	0.351061	0.133074	0.228976	0.23015	0.3161	0.326621	0.422503	0.347665	0.35482	0.353542	-0.123392
cg14171514	chr11	62308492	62308493	+	0.032	0.301147	0.242657	0.427144	0.18316	0.329558	0.296733	0.336054	0.404981	0.550364	0.370682	0.450564	0.422529	-0.125796
cg14178043	chr1	223921358	223921359	+	0.021	0.427227	0.435152	0.582199	0.412779	0.469465	0.465364	0.565348	0.559169	0.637459	0.569162	0.541553	0.574538	-0.109174
cg14188774	chr7	42896343	42896344	+	0.011	0.386701	0.215086	0.200258	0.125674	0.260858	0.237715	0.383411	0.377489	0.359145	0.38966	0.467836	0.395508	-0.157793
cg14196676	chr1	1911069	1911070	-	0.032	0.85962	0.891812	0.920821	0.493644	0.880491	0.809277	0.934841	0.904406	0.915527	0.908544	0.899025	0.912469	-0.103191
cg14223671	chr16	857981	857982	-	0.004	0.0403777	0.301956	0.331255	0.0820139	0.0777242	0.166665	0.424297	0.401422	0.30791	0.383983	0.361362	0.375795	-0.20913
cg14239515	chr19	38885242	38885243	-	0.024	0.539549	0.361018	0.403861	0.316426	0.393187	0.402808	0.54082	0.494891	0.477495	0.55594	0.459338	0.505697	-0.102889
cg14259594	chr22	18958660	18958661	-	0.028	0.038427	0.0641315	0.0753206	0.0850211	0.0603711	0.0646543	0.193713	0.193303	0.311415	0.160978	0.0384303	0.179568	-0.114914
cg14294859	chr9	130862556	130862557	-	0.042	0.406136	0.335602	0.4575	0.228248	0.381101	0.361718	0.51366	0.491386	0.652411	0.535754	0.320367	0.502716	-0.140998
cg14316629	chr6	168436353	168436354	-	0.039	0.524433	0.489241	0.0371173	0.256163	0.4966	0.360711	0.628004	0.548961	0.558073	0.534007	0.445614	0.542932	-0.182221
cg14361252	chr13	111465457	111465458	+	0.02	0.15268	0.344346	0.282438	0.198936	0.136808	0.223041	0.486804	0.327344	0.423269	0.362128	0.261778	0.372265	-0.149223
cg14395298	chr13	23412250	23412251	-	0.007	0.324075	0.275407	0.226975	0.232192	0.0812813	0.227986	0.27139	0.339454	0.345026	0.333612	0.399644	0.337825	-0.109839
cg14397690	chr15	60688948	60688949	+	0.047	0.863363	0.748862	0.855157	0.582506	0.727891	0.755556	0.847516	0.806918	0.904482	0.84859	0.899271	0.861356	-0.1058
cg14426001	chr4	40751717	40751718	-	0.05	0.315156	0.19022	0.341868	0.197322	0.241627	0.257239	0.281961	0.362561	0.53664	0.373277	0.27418	0.365724	-0.108485
cg14453174	chr14	95179729	95179730	-	0.021	0.533675	0.46548	0.612209	0.666674	0.612615	0.578131	0.636837	0.63453	0.78726	0.645699	0.717136	0.684293	-0.106162
cg14454127	chr5	399787	399788	+	0.012	0.257122	0.461253	0.415126	0.299441	0.418641	0.370316	0.469002	0.46825	0.522561	0.449632	0.51141	0.484171	-0.113855
cg14463068	chr2	1820315	1820316	+	0.004	0.597832	0.438365	0.574379	0.474766	0.579224	0.532913	0.615912	0.639159	0.661363	0.634912	0.63912	0.638093	-0.10518
cg14477868	chr5	92938260	92938261	-	0.035	0.326144	0.378137	0.489145	0.227033	0.385409	0.361174	0.431982	0.440354	0.589933	0.438539	0.441995	0.46856	-0.107387
cg14506366	chr5	1430421	1430422	+	0.001	0.606002	0.755645	0.801803	0.681019	0.683505	0.705595	0.822813	0.810879	0.774156	0.836365	0.821002	0.813043	-0.107448
cg14517119	chr5	45678610	45678611	-	0.029	0.747065	0.712334	0.763556	0.884765	0.579297	0.737403	0.87318	0.875154	0.850309	0.85339	0.796502	0.849707	-0.112304
cg14531026	chr3	184043286	184043287	+	0.048	0.808727	0.846109	0.846538	0.750549	0.0434128	0.659067	0.85415	0.858515	0.838559	0.824563	0.862179	0.847593	-0.188526
cg14535332	chr21	35831954	35831955	-	0.009	0.0789164	0.161356	0.0810511	0.0966865	0.0330138	0.0902048	0.299174	0.141847	0.210352	0.197752	0.133827	0.196591	-0.106386
cg14573411	chr9	126135992	126135993	+	0.036	0.369235	0.38788	0.522622	0.376787	0.414866	0.414278	0.437954	0.511897	0.69958	0.520679	0.433158	0.520654	-0.106376
cg14677130	chr5	38445916	38445917	-	0.023	0.426737	0.662363	0.799343	0.711058	0.703087	0.660518	0.78427	0.751278	0.960574	0.732256	0.886711	0.823018	-0.1625
cg14684854	chr2	241901865	241901866	-	0.027	0.455074	0.386595	0.568123	0.355622	0.484805	0.450044	0.512873	0.519686	0.689802	0.537901	0.631678	0.578388	-0.128344
cg14703589	chr22	31644558	31644559	-	0.01	0.441148	0.449793	0.522679	0.385221	0.409085	0.441585	0.544348	0.512724	0.633753	0.558014	0.492758	0.54832	-0.106734
cg14724419	chr11	111178990	111178991	+	0.029	0.318147	0.514322	0.379383	0.610433	0.53062	0.470581	0.624938	0.594604	0.546987	0.600557	0.566484	0.586714	-0.116133
cg14801238	chr6	31275664	31275665	+	0	0.652323	0.595475	0.630962	0.738076	0.589807	0.641329	0.834362	0.800142	0.743866	0.7788	0.780823	0.787599	-0.14627
cg14921437	chr20	32255988	32255989	+	0.013	0.379392	0.363438	0.409669	0.185553	0.303629	0.328336	0.478014	0.409267	0.420436	0.393474	0.468118	0.433862	-0.105526
cg14927745	chr2	241562485	241562486	-	0.031	0.534382	0.706703	0.710753	0.405049	0.741291	0.619636	0.765252	0.681583	0.793901	0.71491	0.772624	0.745654	-0.126019
cg14962509	chr1	36039655	36039656	+	0.011	0.536686	0.433204	0.544193	0.25092	0.50794	0.454588	0.600475	0.600318	0.811491	0.649251	0.536251	0.639557	-0.184969
cg14964336	chr4	1523275	1523276	+	0.036	0.0445269	0.306808	0.239329	0.068784	0.0901335	0.149916	0.234768	0.235904	0.550538	0.285143	0.442836	0.349838	-0.199922
cg14968732	chr12	39298639	39298640	-	0.043	0.381612	0.48553	0.515168	0.267718	0.448303	0.419666	0.547629	0.549262	0.644174	0.566514	0.395455	0.540607	-0.12094
cg14981960	chr1	68607289	68607290	+	0.011	0.861102	0.675388	0.864981	0.651644	0.796486	0.76992	0.895332	0.858803	0.8905	0.874185	0.867669	0.877298	-0.107377
cg15006175	chr8	145698660	145698661	+	0.046	0.289054	0.360931	0.474999	0.164458	0.251579	0.308204	0.395911	0.352431	0.502572	0.425617	0.432528	0.421812	-0.113608
cg15016232	chr4	4737695	4737696	-	0.022	0.595133	0.459232	0.597813	0.512212	0.501028	0.533084	0.576644	0.643856	0.635405	0.583696	0.763192	0.640559	-0.107475
cg15036118	chr3	194651798	194651799	+	0.024	0.781717	0.540282	0.723002	0.522258	0.65169	0.64379	0.760191	0.718988	0.824026	0.747952	0.762014	0.762634	-0.118844
cg15036874	chr22	50705948	50705949	-	0.022	0.441306	0.463985	0.614669	0.527759	0.457131	0.50097	0.619232	0.570311	0.673714	0.547334	0.596874	0.601493	-0.100523
cg15073784	chr2	105406666	105406667	+	0.016	0.163932	0.267915	0.343127	0.158829	0.277066	0.242174	0.33315	0.336348	0.442396	0.331807	0.390326	0.366805	-0.124631
cg15074709	chr13	112547653	112547654	+	0.041	0.389961	0.140042	0.162846	0.0136129	0.015292	0.144351	0.262111	0.274273	0.202788	0.283416	0.374054	0.279328	-0.134978
cg15083233	chr9	112810402	112810403	+	0.025	0.259531	0.203437	0.365701	0.097874	0.244019	0.234112	0.348927	0.293453	0.466699	0.332868	0.324261	0.353242	-0.119129
cg15154229	chr7	130020011	130020012	-	0	0.706776	0.550612	0.69404	0.556141	0.59695	0.620904	0.711814	0.715713	0.738014	0.722548	0.726369	0.722892	-0.101988
cg15165122	chr2	71206291	71206292	+	0.01	0.204842	0.134076	0.144157	0.0589648	0.242522	0.156912	0.243814	0.241563	0.481006	0.321321	0.220849	0.301711	-0.144798
cg15190451	chr17	73090195	73090196	-	0.035	0.936255	0.729334	0.854773	0.620112	0.733771	0.774849	0.845216	0.860569	0.939419	0.932548	0.961438	0.907838	-0.132989
cg15191021	chr17	41321218	41321219	-	0.011	0.234006	0.183187	0.170826	0.116651	0.212878	0.183509	0.208251	0.259047	0.412125	0.282374	0.377539	0.307867	-0.124358
cg15266508	chr20	61447742	61447743	-	0.025	0.2546	0.208128	0.340095	0.129034	0.29265	0.244901	0.293982	0.318038	0.470345	0.365822	0.305686	0.350775	-0.105873
cg15329642	chr1	45308298	45308299	-	0.028	0.486772	0.489279	0.620166	0.471054	0.492161	0.511886	0.567736	0.607266	0.774607	0.602605	0.540745	0.618592	-0.106705
cg15375321	chr18	74496335	74496336	+	0.011	0.605558	0.55578	0.473861	0.62172	0.580246	0.567433	0.705971	0.695104	0.58252	0.672035	0.684575	0.668041	-0.100608
cg15412815	chr11	93271088	93271089	+	0.011	0.703177	0.486948	0.70695	0.639117	0.627902	0.632819	0.679995	0.749803	0.755111	0.7144	0.765143	0.73289	-0.100072
cg15426035	chr19	36024685	36024686	-	0.03	0.22195	0.238855	0.341758	0.190162	0.192617	0.237068	0.24222	0.285568	0.398923	0.347237	0.420723	0.338934	-0.101866
cg15436606	chr4	87881747	87881748	+	0.039	0.792985	0.544474	0.703202	0.394947	0.628702	0.612862	0.746543	0.693006	0.826687	0.751049	0.734214	0.7503	-0.137438
cg15450966	chr4	3486039	3486040	+	0.017	0.465455	0.513804	0.604854	0.469474	0.505706	0.511859	0.566897	0.588892	0.74017	0.578456	0.62045	0.618973	-0.107115
cg15508809	chr14	29231309	29231310	+	0.027	0.159682	0.260356	0.337923	0.15845	0.204172	0.224117	0.347675	0.33003	0.409822	0.339768	0.22094	0.329647	-0.105531
cg15550100	chr2	242606289	242606290	-	0.026	0.806125	0.724246	0.753432	0.464916	0.653559	0.680455	0.747932	0.722923	0.856988	0.845631	0.860548	0.806805	-0.126349
cg15561613	chr1	245851610	245851611	+	0.007	0.463453	0.356297	0.389646	0.286141	0.265455	0.352198	0.460715	0.46374	0.421111	0.469162	0.475871	0.45812	-0.105922
cg15562758	chr2	15209081	15209082	-	0.044	0.587576	0.70639	0.840995	0.564353	0.697217	0.679306	0.779003	0.745391	0.831257	0.765817	0.848877	0.794069	-0.114763
cg15611600	chr13	45563400	45563401	-	0.049	0.0381517	0.060939	0.285768	0.0653202	0.30753	0.151542	0.45276	0.295469	0.401327	0.313074	0.0581955	0.304165	-0.152623
cg15705062	chr19	5110748	5110749	+	0.01	0.75983	0.693461	0.896405	0.592465	0.756229	0.739678	0.929006	0.814775	0.941356	0.914634	0.95715	0.911384	-0.171706
cg15829969	chr1	147801025	147801026	-	0.004	0.570771	0.477782	0.486076	0.526643	0.435739	0.499402	0.573049	0.605984	0.619774	0.600321	0.602077	0.600241	-0.100839
cg15855924	chr13	111565111	111565112	-	0.034	0.538081	0.459156	0.595966	0.405171	0.510622	0.501799	0.635	0.579789	0.680807	0.615806	0.50798	0.603876	-0.102077
cg15864601	chr17	259839	259840	+	0.018	0.306126	0.104463	0.0953663	0.00862409	0.016681	0.106252	0.200081	0.260488	0.254606	0.303747	0.203209	0.244426	-0.138174
cg15867652	chr17	79011277	79011278	-	0.046	0.797953	0.572674	0.65874	0.476129	0.613854	0.62387	0.73373	0.723653	0.781057	0.729684	0.679007	0.729426	-0.105556
cg15911409	chr2	237481080	237481081	-	0.012	0.503527	0.414955	0.683312	0.225763	0.459155	0.457343	0.57475	0.66311	0.807385	0.686934	0.646166	0.675669	-0.218326
cg15922174	chr9	126135998	126135999	+	0.03	0.517429	0.451326	0.56443	0.465457	0.484314	0.496591	0.516931	0.592047	0.809263	0.586436	0.513036	0.603543	-0.106951
cg15934634	chr11	68920095	68920096	+	0.007	0.65458	0.613913	0.737306	0.772345	0.656498	0.686928	0.790221	0.826913	0.944192	0.833398	0.738841	0.826713	-0.139785
cg15977137	chr21	40759694	40759695	-	0.007	0.257649	0.241408	0.228522	0.0186637	0.138568	0.176962	0.314835	0.287937	0.222854	0.305545	0.355364	0.297307	-0.120345
cg15992347	chr11	85565475	85565476	+	0.031	0.23879	0.314454	0.441302	0.249467	0.34027	0.316857	0.427535	0.421451	0.571519	0.428209	0.343475	0.438438	-0.121581
cg15996397	chr2	100831189	100831190	+	0.023	0.461381	0.415815	0.577031	0.314013	0.41316	0.43628	0.522556	0.505239	0.560325	0.54261	0.640559	0.554258	-0.117978
cg15998406	chr19	1287832	1287833	+	0.034	0.228969	0.274469	0.411903	0.177326	0.317879	0.282109	0.331597	0.368476	0.504782	0.393596	0.39497	0.398684	-0.116575
cg16054907	chr22	50706065	50706066	-	0.009	0.378651	0.412212	0.503159	0.464101	0.384384	0.428501	0.555564	0.493222	0.630634	0.523063	0.483602	0.537217	-0.108715
cg16056219	chr14	75043777	75043778	+	0.039	0.805729	0.566761	0.811966	0.581265	0.671092	0.687363	0.808396	0.779312	0.826506	0.791628	0.834879	0.808144	-0.120781
cg16088894	chrX	44169621	44169622	+	0.037	0.946942	0.96223	0.959614	0.965146	0.967207	0.960228	0.598301	0.724999	0.956634	0.698235	0.660276	0.727689	0.232539
cg16148134	chr1	68517205	68517206	-	0.014	0.417954	0.405747	0.284425	0.270325	0.470069	0.369704	0.427228	0.504814	0.465522	0.471353	0.494103	0.472604	-0.1029
cg16170614	chr4	24802387	24802388	+	0.036	0.485308	0.3472	0.530565	0.258269	0.450434	0.414355	0.479099	0.528416	0.629541	0.549599	0.468271	0.530985	-0.11663
cg16194563	chr8	11770970	11770971	+	0.021	0.823085	0.697933	0.816674	0.809552	0.746679	0.778785	0.619191	0.704353	0.709711	0.68001	0.644509	0.671555	0.10723
cg16226866	chr6	110418140	110418141	+	0.026	0.582991	0.632831	0.774691	0.320041	0.544727	0.571056	0.755668	0.665083	0.70215	0.714795	0.714783	0.710496	-0.13944
cg16251399	chr6	58287822	58287823	+	0.035	0.0170026	0.0275324	0.0315475	0.0270913	0.0255746	0.0257497	0.31547	0.0325903	0.378282	0.0306086	0.0271763	0.156825	-0.131076
cg16330535	chr1	2254757	2254758	+	0.048	0.551125	0.372905	0.621695	0.566128	0.415941	0.505559	0.560072	0.612449	0.625469	0.578725	0.753349	0.626013	-0.120454
cg16394018	chr11	14927549	14927550	-	0.008	0.0479091	0.243794	0.0995663	0.208198	0.0906874	0.138031	0.221484	0.254088	0.294131	0.248908	0.360833	0.275889	-0.137858
cg16419584	chr10	129947858	129947859	+	0.046	0.465098	0.493098	0.643883	0.369204	0.68549	0.531355	0.683358	0.744976	0.684416	0.732546	0.519304	0.67292	-0.141565
cg16443079	chr5	1645802	1645803	-	0.004	0.78804	0.761288	0.782193	0.661043	0.390396	0.676592	0.800794	0.805501	0.789696	0.823294	0.801018	0.804061	-0.127469
cg16446484	chr16	31581309	31581310	+	0.026	0.289452	0.318193	0.443425	0.499333	0.480526	0.406186	0.507319	0.516117	0.535616	0.440381	0.580958	0.516078	-0.109893
cg16449687	chr10	42862876	42862877	+	0.015	0.061543	0.0985619	0.0643134	0.0547358	0.0610876	0.0680483	0.20756	0.152907	0.0509527	0.133461	0.403479	0.189672	-0.121624
cg16486327	chr16	85671191	85671192	+	0.017	0.756077	0.678982	0.823599	0.57395	0.699163	0.706354	0.775631	0.759891	0.917821	0.829667	0.900208	0.836644	-0.13029
cg16503611	chr4	114679761	114679762	-	0.018	0.905322	0.896894	0.571573	0.748437	0.929758	0.810397	0.924028	0.919564	0.933515	0.90743	0.946048	0.926117	-0.11572
cg16505548	chrX	49013750	49013751	-	0.03	0.670351	0.581609	0.677927	0.563832	0.504814	0.599707	0.604195	0.685736	0.783019	0.69654	0.745519	0.703002	-0.103295
cg16512364	chr13	50513235	50513236	-	0.036	0.62831	0.588942	0.867689	0.57944	0.562472	0.645371	0.748038	0.735532	0.794202	0.753155	0.864675	0.779121	-0.13375
cg16524108	chr14	74416111	74416112	+	0.016	0.655082	0.719136	0.836475	0.612459	0.643915	0.693413	0.812415	0.796151	0.856891	0.752965	0.872814	0.818247	-0.124834
cg16551732	chr4	169799087	169799088	+	0.015	0.0323711	0.131351	0.230946	0.195091	0.144226	0.146797	0.24527	0.251729	0.486322	0.193932	0.301676	0.295786	-0.148989
cg16559243	chr5	38445612	38445613	-	0.02	0.436448	0.487422	0.646664	0.423418	0.491906	0.497172	0.612273	0.613199	0.745666	0.617823	0.638575	0.645507	-0.148336
cg16582517	chr3	5025885	5025886	-	0.035	0.446744	0.3842	0.482114	0.333669	0.45293	0.419931	0.602402	0.516109	0.588416	0.562536	0.383539	0.5306	-0.110669
cg16607065	chr1	3607222	3607223	+	0.042	0.914339	0.718169	0.849724	0.54283	0.710792	0.747171	0.851544	0.815324	0.902372	0.906001	0.928782	0.880804	-0.133634
cg16611967	chr16	90144006	90144007	+	0.046	0.121673	0.0174632	0.022356	0.201076	0.0189252	0.0762987	0.0177552	0.267825	0.461715	0.266419	0.1592	0.234583	-0.158284
cg16612998	chr11	46940465	46940466	+	0.042	0.145285	0.130857	0.187728	0.0631655	0.181873	0.141782	0.22594	0.283963	0.532836	0.30775	0.067679	0.283634	-0.141852
cg16619186	chrX	44203280	44203281	+	0.045	0.233627	0.235276	0.494684	0.496612	0.315426	0.355125	0.502991	0.398444	0.714275	0.489182	0.437004	0.508379	-0.153254
cg16640865	chr11	72301558	72301559	+	0.005	0.497314	0.370817	0.571247	0.54143	0.459823	0.488126	0.597272	0.607436	0.705896	0.615522	0.551514	0.615528	-0.127402
cg16652462	chr17	43679667	43679668	+	0.001	0.0255469	0.0597831	0.0828561	0.159532	0.11948	0.0894397	0.47986	0.335092	0.408663	0.355896	0.177053	0.351313	-0.261873
cg16681157	chr16	49594482	49594483	-	0.006	0.5746	0.483836	0.674218	0.536253	0.509922	0.555766	0.656864	0.691146	0.76231	0.693959	0.739914	0.708839	-0.153073
cg16691177	chr4	165898666	165898667	+	0.005	0.18567	0.298262	0.40091	0.331972	0.333937	0.31015	0.425607	0.418316	0.393512	0.412894	0.49328	0.428722	-0.118572
cg16704958	chr21	38630728	38630729	-	0.002	0.224142	0.224081	0.0455491	0.0180896	0.050615	0.112495	0.379344	0.255514	0.373624	0.278787	0.3727	0.331994	-0.219498
cg16719517	chr21	37442385	37442386	+	0.004	0.0209568	0.0255047	0.0199698	0.0168434	0.0261261	0.0218802	0.031128	0.143223	0.383715	0.158059	0.0286591	0.148957	-0.127077
cg16755924	chrX	25041099	25041100	-	0.036	0.139837	0.151171	0.338275	0.0412543	0.163309	0.166769	0.258275	0.298293	0.470827	0.35905	0.179379	0.313165	-0.146395
cg16763089	chr20	5485284	5485285	+	0.015	0.481677	0.275413	0.287041	0.363003	0.163953	0.314217	0.422395	0.399289	0.475712	0.426269	0.534586	0.45165	-0.137433
cg16769623	chr9	115835613	115835614	-	0.045	0.329656	0.236331	0.572076	0.183394	0.484485	0.361189	0.507629	0.519654	0.513359	0.51774	0.655707	0.542818	-0.181629
cg16796458	chr16	85254655	85254656	+	0.023	0.453456	0.505922	0.622717	0.447242	0.51634	0.509136	0.599413	0.566469	0.773344	0.545128	0.671829	0.631237	-0.122101
cg16823064	chr1	19206559	19206560	-	0.006	0.795964	0.642148	0.76803	0.632198	0.737324	0.715133	0.779534	0.789394	0.863773	0.871853	0.799812	0.820873	-0.105741
cg16888565	chr15	63305933	63305934	+	0.001	0.638645	0.567029	0.439566	0.506827	0.588375	0.548089	0.651448	0.648105	0.702011	0.667243	0.799109	0.693583	-0.145494
cg16937168	chr2	241936844	241936845	+	0.032	0.691516	0.52442	0.689188	0.397566	0.612622	0.583062	0.72656	0.710607	0.774827	0.663905	0.670202	0.70922	-0.126158
cg16947138	chr11	100610569	100610570	-	0.002	0.741587	0.746639	0.782073	0.51038	0.735175	0.703171	0.882899	0.778332	0.832245	0.783349	0.829709	0.821307	-0.118136
cg16967578	chr1	218575437	218575438	-	0.037	0.672301	0.486627	0.640918	0.560251	0.543965	0.580812	0.727738	0.72558	0.789508	0.742683	0.551587	0.707419	-0.126607
cg17014757	chr1	203156097	203156098	-	0.039	0.643031	0.473639	0.57096	0.348519	0.498953	0.50702	0.618124	0.615387	0.62933	0.627219	0.549064	0.607825	-0.100804
cg17018349	chr15	68136196	68136197	+	0.04	0.849289	0.707447	0.826627	0.539431	0.785683	0.741695	0.821707	0.805864	0.901439	0.850359	0.8505	0.845974	-0.104278
cg17022548	chr5	139294892	139294893	-	0.014	0.735229	0.502076	0.651517	0.518616	0.51369	0.584226	0.706812	0.733158	0.712463	0.728524	0.68089	0.712369	-0.128143
cg17092065	chr15	67458398	67458399	-	0.035	0.534412	0.38082	0.542846	0.362723	0.444239	0.453008	0.533993	0.531334	0.635988	0.573991	0.519712	0.559004	-0.105996
cg17134700	chr6	29854631	29854632	+	0.004	0.918979	0.415017	0.922918	0.933053	0.918486	0.82169	0.929643	0.945471	0.949882	0.938613	0.948603	0.942442	-0.120752
cg17138769	chr10	118892211	118892212	+	0.013	0.0439584	0.31737	0.379119	0.350695	0.350718	0.288372	0.590434	0.449297	0.320051	0.446229	0.448101	0.450823	-0.16245
cg17141972	chr6	77547510	77547511	-	0.011	0.748785	0.791982	0.700898	0.773456	0.630082	0.729041	0.801323	0.829288	0.771872	0.837551	0.938866	0.83578	-0.106739
cg17147265	chr4	184279327	184279328	+	0.023	0.788642	0.714347	0.870697	0.908979	0.718533	0.80024	0.89249	0.913602	0.945833	0.889929	0.872661	0.902903	-0.102663
cg17180284	chr13	31783983	31783984	+	0.041	0.515376	0.40507	0.565913	0.29093	0.450521	0.445562	0.56036	0.530077	0.666341	0.544795	0.488988	0.558112	-0.11255
cg17202519	chr11	84634581	84634582	+	0.012	0.243446	0.392743	0.374402	0.333781	0.287485	0.326371	0.4448	0.454778	0.72836	0.423923	0.358158	0.482004	-0.155632
cg17207552	chrX	39767775	39767776	-	0.049	0.646542	0.447841	0.582694	0.4116	0.508567	0.519449	0.616688	0.639506	0.68158	0.653931	0.54298	0.626937	-0.107488
cg17266963	chr15	82959442	82959443	-	0.013	0.621502	0.52884	0.55475	0.591701	0.498377	0.559034	0.622071	0.63683	0.588533	0.634807	0.843004	0.665049	-0.106015
cg17360552	chr6	32725332	32725333	+	0.045	0.677418	0.575039	0.729469	0.748151	0.648139	0.675643	0.740445	0.764889	0.704515	0.73443	0.940687	0.776993	-0.10135
cg17386213	chr6	108488335	108488336	+	0.008	0.135899	0.0930793	0.222844	0.0772553	0.135967	0.133009	0.276556	0.243333	0.298018	0.265337	0.17895	0.252439	-0.11943
cg17431280	chr19	47507461	47507462	-	0.013	0.111798	0.19679	0.260759	0.100969	0.109782	0.15602	0.234351	0.221498	0.391654	0.263185	0.424959	0.307129	-0.15111
cg17432380	chr13	100609235	100609236	-	0.043	0.0952758	0.0761254	0.146795	0.123163	0.125888	0.113449	0.143115	0.25421	0.391551	0.209597	0.081055	0.215906	-0.102456
cg17446739	chr10	71892768	71892769	+	0.005	0.13518	0.08699	0.170883	0.0937409	0.14006	0.125371	0.163822	0.213072	0.285684	0.248621	0.243161	0.230872	-0.105501
cg17505155	chr13	98824355	98824356	+	0.012	0.121493	0.290792	0.30402	0.191939	0.223158	0.22628	0.371661	0.284086	0.256226	0.316813	0.50953	0.347663	-0.121382
cg17553881	chr5	443987	443988	+	0.018	0.541845	0.538761	0.471676	0.514771	0.439502	0.501311	0.416586	0.441251	0.320636	0.404318	0.404123	0.397383	0.103928
cg17655970	chr13	112985463	112985464	-	0.013	0.296299	0.132805	0.131588	0.0607232	0.0898597	0.142255	0.231079	0.203826	0.204296	0.272839	0.358666	0.254141	-0.111886
cg17668981	chr5	138617804	138617805	+	0.039	0.578414	0.414403	0.657294	0.438965	0.502721	0.518359	0.563215	0.619837	0.626473	0.608038	0.683236	0.62016	-0.1018
cg17687551	chr3	197029445	197029446	-	0.036	0.304674	0.695256	0.862096	0.361436	0.72592	0.589876	0.76526	0.792435	0.871492	0.788151	0.907962	0.82506	-0.235184
cg17743250	chr10	94820927	94820928	-	0.04	0.644817	0.40058	0.673248	0.707644	0.486016	0.582461	0.643731	0.72803	0.732898	0.702892	0.728487	0.707208	-0.124746
cg17759252	chr19	18888081	18888082	+	0.001	0.325708	0.424404	0.410713	0.362829	0.370385	0.378808	0.638278	0.476639	0.530397	0.4646	0.491871	0.520357	-0.141549
cg17830515	chr7	1151900	1151901	+	0.003	0.80603	0.803671	0.531057	0.767686	0.834187	0.748526	0.911657	0.851874	0.915598	0.835411	0.837601	0.870428	-0.121902
cg17855963	chr6	15873800	15873801	-	0.033	0.708764	0.74717	0.849176	0.581087	0.747392	0.726718	0.834078	0.776033	0.901879	0.809378	0.840678	0.832409	-0.105691
cg17871621	chr2	233216150	233216151	-	0.048	0.436159	0.202685	0.270887	0.133757	0.159093	0.240516	0.340334	0.281558	0.417816	0.31091	0.373956	0.344915	-0.104399
cg17946995	chr12	113796032	113796033	-	0.012	0.196015	0.242197	0.162633	0.18965	0.259628	0.210025	0.306305	0.341091	0.463114	0.297473	0.234654	0.328527	-0.118503
cg18022012	chr2	10444757	10444758	+	0.02	0.394965	0.354844	0.489182	0.329971	0.378031	0.389399	0.473576	0.514174	0.629084	0.51081	0.40231	0.505991	-0.116592
cg18089397	chr4	2264747	2264748	+	0.016	0.11169	0.163358	0.207951	0.132347	0.140081	0.151085	0.299924	0.253299	0.402669	0.255263	0.137758	0.269783	-0.118697
cg18099096	chr4	23936764	23936765	-	0.018	0.547109	0.434582	0.591212	0.421881	0.465161	0.491989	0.565769	0.589869	0.671663	0.587035	0.574092	0.597686	-0.105697
cg18107827	chr1	26488988	26488989	-	0.01	0.440151	0.385491	0.52171	0.368114	0.443828	0.431859	0.521634	0.566195	0.632511	0.558385	0.461124	0.54797	-0.116111
cg18124706	chrX	107333538	107333539	-	0.036	0.56007	0.703092	0.725596	0.456826	0.624103	0.613937	0.664494	0.71018	0.780561	0.737352	0.70089	0.718695	-0.104758
cg18130688	chr3	28119270	28119271	-	0.037	0.254971	0.333899	0.454035	0.288792	0.338991	0.334137	0.402311	0.392931	0.461028	0.354709	0.594657	0.441127	-0.10699
cg18131141	chr1	36043002	36043003	+	0.009	0.367441	0.400616	0.495292	0.19755	0.352955	0.362771	0.489297	0.512529	0.685727	0.544426	0.481181	0.542632	-0.179861
cg18148498	chr1	1380621	1380622	+	0.023	0.492874	0.899564	0.50004	0.960011	0.916386	0.753775	0.942994	0.9426	0.937345	0.952526	0.939446	0.942982	-0.189207
cg18153989	chrX	113949673	113949674	+	0.046	0.753114	0.607676	0.835483	0.618551	0.70018	0.703001	0.758963	0.744444	0.854475	0.798325	0.878678	0.806977	-0.103976
cg18155913	chr2	41950815	41950816	+	0.023	0.552931	0.609897	0.704998	0.510956	0.559276	0.587612	0.715652	0.637247	0.6366	0.681143	0.818936	0.697915	-0.110304
cg18180407	chr1	55047736	55047737	+	0.015	0.700964	0.597297	0.760297	0.610757	0.676116	0.669086	0.733572	0.765565	0.82793	0.75577	0.769122	0.770392	-0.101306
cg18241962	chr17	75385432	75385433	-	0.04	0.533208	0.340375	0.545871	0.243805	0.420657	0.416783	0.505088	0.513899	0.624571	0.562515	0.540546	0.549324	-0.132541
cg18264486	chr6	31650916	31650917	-	0.003	0.224874	0.129882	0.143773	0.0594211	0.180014	0.147593	0.290964	0.298643	0.230035	0.342246	0.198325	0.272043	-0.12445
cg18271789	chr7	4832112	4832113	-	0	0.478687	0.340108	0.447556	0.22814	0.337228	0.366344	0.493466	0.503861	0.604287	0.49686	0.581221	0.535939	-0.169595
cg18290233	chr5	92931173	92931174	-	0.005	0.681875	0.613384	0.718646	0.514208	0.696656	0.644954	0.745647	0.715554	0.809895	0.750185	0.720188	0.748294	-0.10334
cg18303397	chr3	129160135	129160136	-	0.028	0.553675	0.477085	0.58378	0.511491	0.578381	0.540882	0.680481	0.674859	0.818379	0.648322	0.508973	0.666203	-0.12532
cg18314778	chr7	157468321	157468322	+	0.019	0.46923	0.43298	0.489206	0.573135	0.443023	0.481515	0.622632	0.619339	0.732989	0.63076	0.464023	0.613949	-0.132434
cg18347010	chr17	55888532	55888533	-	0.027	0.455107	0.407241	0.496953	0.281697	0.398312	0.407862	0.429163	0.518694	0.63736	0.513329	0.476115	0.514932	-0.10707
cg18353675	chr3	196260501	196260502	+	0.003	0.471717	0.376814	0.434975	0.324686	0.508916	0.423422	0.55068	0.538344	0.575804	0.548074	0.532423	0.549065	-0.125643
cg18372896	chr14	75897376	75897377	-	0.04	0.352479	0.231243	0.503991	0.181183	0.247362	0.303252	0.379104	0.345363	0.549338	0.434651	0.527288	0.447149	-0.143897
cg18380783	chr21	38630506	38630507	+	0.002	0.190733	0.200321	0.107871	0.0866036	0.113185	0.139743	0.355646	0.241588	0.261191	0.233854	0.352578	0.288971	-0.149229
cg18391209	chr1	223747670	223747671	+	0.023	0.311462	0.266558	0.921292	0.740857	0.340774	0.516189	0.879484	0.873404	0.913118	0.884766	0.919099	0.893974	-0.377786
cg18405140	chr19	1207644	1207645	+	0.029	0.578231	0.451981	0.582919	0.343675	0.477547	0.486871	0.607094	0.596487	0.71088	0.607463	0.481418	0.600668	-0.113798
cg18409649	chr7	99066398	99066399	-	0.048	0.415762	0.572142	0.475774	0.432157	0.68982	0.517131	0.65998	0.610683	0.539264	0.679311	0.739262	0.6457	-0.128569
cg18410945	chr7	157257054	157257055	+	0.021	0.438034	0.359389	0.555769	0.331328	0.435134	0.423931	0.467892	0.528926	0.535265	0.548615	0.564215	0.528983	-0.105052
cg18446641	chr6	113198826	113198827	+	0.037	0.568608	0.484178	0.6826	0.331153	0.525051	0.518318	0.601348	0.620608	0.632915	0.690446	0.605521	0.630168	-0.11185
cg18459489	chr10	118890977	118890978	-	0.033	0.354227	0.537545	0.573509	0.531418	0.523011	0.503942	0.72306	0.630563	0.607027	0.62336	0.490265	0.614855	-0.110913
cg18503912	chr19	35630279	35630280	-	0.038	0.722106	0.515406	0.693398	0.491327	0.567323	0.597912	0.67897	0.690887	0.744313	0.707081	0.718467	0.707944	-0.110032
cg18516898	chr10	89116779	89116780	-	0.014	0.936708	0.928543	0.924125	0.590171	0.581222	0.792154	0.94401	0.932657	0.949344	0.937066	0.929139	0.938443	-0.146289
cg18576957	chr6	31651020	31651021	-	0.01	0.332624	0.203455	0.249278	0.0654178	0.217351	0.213625	0.409286	0.444022	0.408257	0.493783	0.243279	0.399726	-0.186101
cg18587557	chr17	33760419	33760420	-	0.006	0.157264	0.172597	0.274584	0.210695	0.261094	0.215247	0.352045	0.296718	0.433642	0.307342	0.264119	0.330773	-0.115526
cg18589526	chr7	138575872	138575873	-	0.007	0.701756	0.560713	0.68741	0.511803	0.636065	0.619549	0.708908	0.687854	0.781199	0.721243	0.717408	0.723322	-0.103773
cg18653451	chr19	46917018	46917019	+	0.025	0.306131	0.254837	0.373624	0.106709	0.289174	0.266095	0.364655	0.347805	0.472831	0.40425	0.312611	0.38043	-0.114335
cg18676679	chr16	87984422	87984423	+	0.02	0.0490345	0.0501693	0.0544237	0.0648173	0.038635	0.051416	0.0612576	0.167524	0.489988	0.170294	0.0545201	0.188717	-0.137301
cg18709881	chr18	72837627	72837628	+	0.05	0.642766	0.716914	0.72418	0.835785	0.595676	0.703064	0.839595	0.763542	0.758094	0.786802	0.882945	0.806196	-0.103131
cg18712199	chr14	29240691	29240692	+	0.044	0.117476	0.178627	0.484736	0.134807	0.125457	0.208221	0.369267	0.430694	0.665823	0.427258	0.210561	0.420721	-0.2125
cg18751133	chr6	99842351	99842352	+	0.032	0.597027	0.643617	0.805721	0.769963	0.824716	0.728209	0.845598	0.81767	0.818656	0.797078	0.884862	0.832773	-0.104564
cg18813159	chr11	353762	353763	+	0.015	0.555405	0.436779	0.600441	0.396526	0.490891	0.496008	0.589911	0.570266	0.691932	0.575761	0.626499	0.610874	-0.114865
cg18834058	chr7	4832174	4832175	-	0.022	0.471651	0.277598	0.439147	0.19219	0.223169	0.320751	0.441746	0.440553	0.531676	0.460724	0.559155	0.486771	-0.16602
cg18843856	chr2	121651050	121651051	-	0.01	0.492891	0.355219	0.592844	0.487154	0.470497	0.479721	0.532594	0.620464	0.613403	0.634233	0.602101	0.600559	-0.120838
cg18883317	chr5	6349400	6349401	-	0.027	0.620842	0.726494	0.860394	0.639813	0.75518	0.720545	0.845892	0.783685	0.859342	0.798103	0.906659	0.838736	-0.118192
cg18912209	chr4	170696239	170696240	+	0.003	0.0622549	0.140703	0.192382	0.0625635	0.117412	0.115063	0.25229	0.275051	0.417271	0.319758	0.246401	0.302154	-0.187091
cg18973628	chr11	94245350	94245351	-	0.009	0.431137	0.413405	0.537538	0.363778	0.453404	0.439853	0.520553	0.549353	0.675635	0.553438	0.495512	0.558898	-0.119046
cg18973878	chr18	77905119	77905120	-	0.006	0.216359	0.24138	0.221238	0.252987	0.251255	0.236644	0.30147	0.250291	0.428904	0.262655	0.545166	0.357697	-0.121053
cg19043450	chr19	595705	595706	+	0.031	0.750053	0.620709	0.856845	0.594497	0.645056	0.693432	0.797096	0.763804	0.840916	0.82251	0.920439	0.828953	-0.135521
cg19049858	chr12	53661747	53661748	-	0.01	0.0756948	0.0710833	0.0551717	0.0706958	0.0872392	0.0719769	0.0711706	0.168933	0.300008	0.180828	0.148208	0.17383	-0.101853
cg19062174	chr2	157323390	157323391	-	0.009	0.439876	0.405168	0.5303	0.243609	0.496404	0.423071	0.530535	0.5176	0.578557	0.560379	0.56675	0.550764	-0.127693
cg19067025	chr15	37398175	37398176	-	0.019	0.596747	0.521156	0.650842	0.521066	0.56497	0.570956	0.784171	0.699359	0.749395	0.730421	0.55988	0.704645	-0.133689
cg19081101	chr1	203156625	203156626	-	0.006	0.515866	0.295187	0.430029	0.321594	0.467983	0.406132	0.48719	0.551168	0.661491	0.592165	0.56472	0.571347	-0.165215
cg19083407	chr2	113993142	113993143	-	0.042	0.924367	0.653545	0.875959	0.869799	0.38538	0.74181	0.902544	0.902716	0.946098	0.909595	0.887065	0.909604	-0.167794
cg19112186	chr22	51016638	51016639	-	0.028	0.0766494	0.255911	0.246933	0.201054	0.223768	0.200863	0.210964	0.27295	0.362311	0.281516	0.408729	0.307294	-0.106431
cg19183395	chr2	233216865	233216866	-	0.007	0.591534	0.497208	0.544663	0.228027	0.313387	0.434964	0.62248	0.556252	0.646021	0.568956	0.641216	0.606985	-0.172021
cg19224645	chr1	39282003	39282004	+	0.036	0.327132	0.255078	0.348266	0.233652	0.29582	0.29199	0.419144	0.35849	0.525534	0.409825	0.257458	0.39409	-0.102101
cg19230501	chr10	35926227	35926228	+	0.039	0.408617	0.300522	0.555784	0.227197	0.392671	0.376959	0.465899	0.48508	0.527112	0.501573	0.471178	0.490168	-0.11321
cg19241954	chr1	208421318	208421319	-	0.033	0.621285	0.561642	0.622236	0.697282	0.524402	0.60537	0.661449	0.74139	0.806676	0.718687	0.614465	0.708533	-0.103164
cg19256314	chr12	109227237	109227238	+	0.033	0.675593	0.596888	0.685904	0.420204	0.603229	0.596364	0.743245	0.647407	0.755277	0.629363	0.734009	0.70186	-0.105497
cg19299265	chr10	1975631	1975632	-	0.006	0.55158	0.664217	0.640919	0.644143	0.533777	0.606927	0.779937	0.69921	0.656617	0.711909	0.737087	0.716952	-0.110025
cg19375587	chr11	2871478	2871479	+	0.041	0.881426	0.774347	0.748055	0.936338	0.893555	0.846744	0.673891	0.754076	0.746633	0.732621	0.720797	0.725604	0.121141
cg19386484	chr7	130131709	130131710	-	0.011	0.434042	0.455461	0.537208	0.457725	0.548529	0.486593	0.534744	0.72506	0.580575	0.607655	0.605322	0.610671	-0.124078
cg19414711	chr7	127391366	127391367	+	0.031	0.687975	0.5272	0.729097	0.518914	0.575887	0.607814	0.704146	0.676558	0.748391	0.687664	0.74485	0.712322	-0.104507
cg19497082	chr2	59185274	59185275	-	0.049	0.75581	0.531055	0.719887	0.494276	0.601856	0.620577	0.737524	0.700993	0.754918	0.699047	0.760558	0.730608	-0.110031
cg19511338	chr10	43247938	43247939	-	0.015	0.46095	0.495522	0.569245	0.549071	0.467417	0.508441	0.649556	0.624181	0.520841	0.649864	0.7179	0.632469	-0.124028
cg19521832	chr21	35831996	35831997	+	0.003	0.209	0.235188	0.17572	0.245693	0.114327	0.195986	0.430529	0.303083	0.35442	0.30346	0.285858	0.33547	-0.139485
cg19558802	chr15	51695713	51695714	-	0.019	0.481287	0.623647	0.519223	0.589429	0.435203	0.529758	0.762933	0.693526	0.667571	0.735896	0.538239	0.679633	-0.149875
cg19566405	chr17	33759965	33759966	+	0.02	0.0695494	0.220387	0.130133	0.184001	0.305578	0.18193	0.401583	0.299141	0.530941	0.302037	0.201516	0.347044	-0.165114
cg19600538	chr1	95329706	95329707	-	0.049	0.656573	0.478405	0.635197	0.465037	0.518775	0.550797	0.611117	0.633717	0.717987	0.669292	0.623218	0.651066	-0.100269
cg19636627	chr6	29649084	29649085	+	0.048	0.652557	0.361049	0.949143	0.725969	0.650415	0.667827	0.741863	0.887894	0.902149	0.886707	0.916829	0.867088	-0.199262
cg19641570	chr13	98825009	98825010	-	0.031	0.357538	0.182652	0.384172	0.128603	0.279137	0.26642	0.381317	0.378377	0.563366	0.4004	0.315597	0.407811	-0.141391
cg19665696	chr7	949154	949155	+	0.01	0.16158	0.156307	0.493986	0.161217	0.212706	0.237159	0.662544	0.474114	0.592289	0.465957	0.63246	0.565473	-0.328314
cg19684207	chr21	40759686	40759687	-	0.005	0.355288	0.290202	0.277002	0.0148236	0.186924	0.224848	0.348479	0.359843	0.317362	0.384471	0.431995	0.36843	-0.143582
cg19707853	chr15	98197914	98197915	+	0.021	0.631792	0.658995	0.5821	0.713709	0.641159	0.645551	0.506105	0.597134	0.464265	0.549908	0.491211	0.521725	0.123826
cg19711530	chr17	44847427	44847428	-	0.021	0.316482	0.390442	0.507494	0.376722	0.351641	0.388556	0.432579	0.48521	0.80441	0.478339	0.484117	0.536931	-0.148375
cg19761502	chr21	40759534	40759535	+	0.003	0.238759	0.186207	0.222861	0.124782	0.159807	0.186483	0.305204	0.2864	0.221977	0.288561	0.360657	0.29256	-0.106076
cg19774868	chr18	77905408	77905409	-	0	0.320707	0.318782	0.303946	0.171445	0.308229	0.284622	0.328561	0.388048	0.376904	0.441903	0.426013	0.392286	-0.107664
cg19828063	chr13	112626953	112626954	-	0.024	0.539932	0.466012	0.524636	0.622061	0.58937	0.548402	0.666412	0.649921	0.737988	0.623662	0.571661	0.649929	-0.101527
cg19876672	chr10	118891266	118891267	+	0.005	0.215579	0.367496	0.465096	0.447599	0.378635	0.374881	0.612771	0.49862	0.460299	0.503916	0.469116	0.508945	-0.134064
cg19885037	chr3	4762242	4762243	+	0.004	0.655263	0.519677	0.616714	0.497327	0.555883	0.568973	0.689007	0.677085	0.73221	0.667135	0.626018	0.678291	-0.109318
cg19938535	chr6	25341389	25341390	+	0.022	0.37008	0.882284	0.408064	0.843982	0.576938	0.616269	0.910137	0.892129	0.85819	0.927731	0.805781	0.878794	-0.262524
cg19963856	chr17	33759573	33759574	+	0.012	0.160512	0.328777	0.359474	0.319037	0.437118	0.320983	0.476721	0.428396	0.676503	0.432467	0.399106	0.482639	-0.161655
cg20005518	chr17	33759484	33759485	+	0.021	0.04652	0.114403	0.123482	0.182385	0.219051	0.137168	0.27907	0.241069	0.386573	0.229719	0.13305	0.253896	-0.116728
cg20071670	chr11	73661895	73661896	+	0.006	0.724518	0.559044	0.709055	0.585962	0.575366	0.630789	0.720896	0.715825	0.835601	0.788533	0.752974	0.762766	-0.131977
cg20135243	chr8	27183285	27183286	-	0.039	0.291509	0.367006	0.432501	0.18816	0.426981	0.341231	0.424344	0.459632	0.652612	0.48257	0.37319	0.47847	-0.137238
cg20188212	chr12	313104	313105	+	0.016	0.0496473	0.301393	0.0533853	0.132828	0.0726403	0.121979	0.306264	0.210522	0.290073	0.230593	0.432567	0.294004	-0.172025
cg20191338	chr18	77905663	77905664	+	0	0.356927	0.326538	0.292287	0.255155	0.354411	0.317064	0.380594	0.449958	0.419034	0.437845	0.447595	0.427005	-0.109942
cg20200605	chr11	116706864	116706865	-	0.019	0.084159	0.0901589	0.0722294	0.0525452	0.100763	0.0799712	0.213829	0.164127	0.28879	0.181346	0.0619752	0.182013	-0.102042
cg20209499	chr2	26929892	26929893	+	0.024	0.538773	0.775173	0.631343	0.472911	0.659113	0.615462	0.776965	0.702436	0.757331	0.678896	0.734311	0.729988	-0.114525
cg20267580	chr1	85220130	85220131	+	0.004	0.384487	0.391989	0.444275	0.458591	0.441461	0.424161	0.462629	0.483352	0.761792	0.491955	0.630281	0.566002	-0.141841
cg20272979	chr15	41787780	41787781	-	0.022	0.484221	0.354078	0.43951	0.21848	0.357472	0.370752	0.456372	0.481272	0.533706	0.469595	0.44678	0.477545	-0.106793
cg20295248	chr20	5485270	5485271	+	0.016	0.486542	0.305053	0.322043	0.416116	0.204965	0.346944	0.440384	0.443184	0.508938	0.4469	0.528829	0.473647	-0.126703
cg20300776	chr1	88433987	88433988	+	0.043	0.694931	0.54072	0.775142	0.509007	0.619086	0.627777	0.722564	0.697324	0.767044	0.712562	0.769329	0.733765	-0.105987
cg20345234	chr10	65801377	65801378	-	0	0.381077	0.346237	0.422261	0.308117	0.300869	0.351712	0.481425	0.464664	0.462813	0.429734	0.473578	0.462443	-0.110731
cg20372666	chr10	71149910	71149911	-	0.033	0.783468	0.566335	0.739865	0.542596	0.603807	0.647214	0.737213	0.772652	0.792413	0.759879	0.781179	0.768667	-0.121453
cg20382867	chr2	12310085	12310086	+	0.037	0.402148	0.262027	0.41553	0.231031	0.367513	0.33565	0.444671	0.453739	0.549573	0.458138	0.331213	0.447467	-0.111817
cg20384620	chr7	158122229	158122230	+	0.022	0.601267	0.59254	0.78248	0.845707	0.553837	0.675166	0.821616	0.840513	0.973734	0.795163	0.979339	0.882073	-0.206907
cg20390253	chr18	77793812	77793813	+	0.048	0.231711	0.461565	0.323406	0.359631	0.355514	0.346365	0.472211	0.51442	0.33306	0.438011	0.491208	0.449782	-0.103417
cg20418125	chr11	133099168	133099169	+	0.015	0.627604	0.511246	0.688234	0.515861	0.619171	0.592423	0.698772	0.729131	0.803977	0.682523	0.66206	0.715293	-0.12287
cg20435535	chr6	31651151	31651152	-	0.006	0.455805	0.269547	0.336572	0.184637	0.336324	0.316577	0.446646	0.474871	0.472314	0.508393	0.367562	0.453957	-0.13738
cg20446334	chr17	79010458	79010459	-	0.014	0.491739	0.224751	0.340674	0.316256	0.343452	0.343374	0.49743	0.483354	0.564188	0.573158	0.351311	0.493888	-0.150514
cg20457259	chrX	25040808	25040809	+	0.001	0.184825	0.216561	0.29676	0.221542	0.273299	0.238597	0.311189	0.315792	0.478421	0.331771	0.343054	0.356045	-0.117448
cg20534287	chr10	135191450	135191451	-	0.004	0.423212	0.458181	0.444673	0.517602	0.457393	0.460212	0.577166	0.548761	0.544106	0.571862	0.559727	0.560324	-0.100112
cg20563468	chr14	29225754	29225755	+	0.015	0.254349	0.371351	0.530069	0.33918	0.321189	0.363228	0.546451	0.512235	0.640489	0.535041	0.384382	0.523719	-0.160492
cg20576162	chr4	667306	667307	+	0.011	0.32572	0.499647	0.423698	0.319663	0.451251	0.403996	0.574903	0.502534	0.509577	0.473279	0.494381	0.510934	-0.106939
cg20690420	chr6	108488751	108488752	+	0.008	0.516134	0.450209	0.592059	0.522052	0.51832	0.519755	0.648692	0.619093	0.653694	0.625715	0.563625	0.622164	-0.102409
cg20698501	chr17	259755	259756	-	0.031	0.378639	0.167501	0.213808	0.0824585	0.0882172	0.186125	0.25382	0.346457	0.329026	0.378103	0.291987	0.319879	-0.133754
cg20732304	chr13	113752657	113752658	-	0.017	0.358763	0.486268	0.611476	0.468964	0.443216	0.473738	0.577724	0.552623	0.695027	0.565123	0.619395	0.601978	-0.128241
cg20736031	chr12	114203961	114203962	+	0.035	0.637936	0.638209	0.811068	0.549921	0.667737	0.660974	0.752315	0.772999	0.743758	0.714449	0.841934	0.765091	-0.104117
cg20773588	chr7	55134101	55134102	-	0.032	0.686139	0.497675	0.819442	0.427302	0.714507	0.629013	0.759305	0.779027	0.871848	0.814296	0.741767	0.793249	-0.164236
cg20799268	chr8	142275649	142275650	+	0.022	0.267198	0.14643	0.393262	0.141742	0.259523	0.241631	0.357809	0.328918	0.47647	0.383779	0.390961	0.387588	-0.145957
cg20807254	chr8	128065128	128065129	-	0.031	0.640356	0.492282	0.729651	0.583731	0.512236	0.591651	0.657418	0.703191	0.775775	0.680248	0.754143	0.714155	-0.122504
cg20943076	chr7	4113480	4113481	-	0.004	0.461342	0.70825	0.611192	0.577891	0.68207	0.608149	0.7094	0.714795	0.801327	0.730792	0.747452	0.740753	-0.132604
cg20945055	chr17	836474	836475	-	0.017	0.573919	0.592407	0.548438	0.414612	0.633325	0.55254	0.669908	0.635686	0.721856	0.685655	0.585575	0.659736	-0.107196
cg20969923	chr14	51295867	51295868	+	0.029	0.612044	0.55809	0.574192	0.570896	0.534949	0.570034	0.73629	0.769823	0.764863	0.695542	0.511683	0.69564	-0.125606
cg20994022	chr17	7197813	7197814	+	0.007	0.314104	0.0626921	0.111953	0.0294058	0.0389471	0.11142	0.274179	0.250899	0.180604	0.338913	0.348964	0.278712	-0.167291
cg21002146	chr14	92303622	92303623	+	0	0.835093	0.631031	0.870614	0.783079	0.851831	0.794329	0.887907	0.881235	0.918331	0.89384	0.919099	0.900082	-0.105753
cg21015805	chr17	73080225	73080226	+	0.022	0.575533	0.594426	0.652186	0.393434	0.594491	0.562014	0.628047	0.61766	0.764479	0.669553	0.63818	0.663584	-0.10157
cg21036936	chr15	74317780	74317781	-	0.027	0.6492	0.490902	0.680076	0.577625	0.564467	0.592454	0.638883	0.702286	0.678984	0.645062	0.805052	0.694053	-0.101599
cg21048763	chr17	77997997	77997998	+	0.03	0.656246	0.693764	0.821246	0.707923	0.786655	0.733167	0.835669	0.770918	0.876192	0.805626	0.890782	0.835837	-0.10267
cg21049501	chr17	70120411	70120412	+	0.007	0.56252	0.208469	0.461198	0.374679	0.378094	0.396992	0.510516	0.588192	0.662583	0.619137	0.598947	0.595875	-0.198883
cg21054919	chr2	233216361	233216362	-	0.003	0.530534	0.488003	0.523126	0.400744	0.424199	0.473321	0.606629	0.580461	0.620552	0.589207	0.536526	0.586675	-0.113354
cg21077578	chr7	1022970	1022971	+	0.035	0.642018	0.776325	0.849595	0.643176	0.700474	0.722318	0.838417	0.76633	0.80325	0.853189	0.865629	0.825363	-0.103046
cg21096718	chr17	35577353	35577354	+	0.029	0.426681	0.651062	0.433398	0.530722	0.54511	0.517394	0.58999	0.647154	0.635082	0.654596	0.563665	0.618098	-0.100703
cg21154793	chr19	54495222	54495223	+	0.001	0.198424	0.220657	0.25712	0.197335	0.169603	0.208628	0.314697	0.289672	0.439037	0.349512	0.275088	0.333601	-0.124973
cg21159128	chr1	54693933	54693934	-	0.005	0.218475	0.158279	0.283152	0.0574531	0.17971	0.179414	0.293575	0.263057	0.248438	0.304346	0.334322	0.288748	-0.109334
cg21167402	chr5	1594676	1594677	-	0.03	0.0247449	0.366983	0.0214155	0.0282779	0.0449137	0.0972671	0.460322	0.382055	0.333684	0.433443	0.0396165	0.329824	-0.232557
cg21169762	chr14	81790336	81790337	+	0.009	0.715459	0.594044	0.727323	0.540856	0.638536	0.643243	0.726427	0.740414	0.809715	0.737174	0.723588	0.747464	-0.10422
cg21171115	chr9	112887903	112887904	-	0.035	0.575214	0.48293	0.636719	0.314003	0.525623	0.506898	0.557799	0.608586	0.750698	0.591449	0.731328	0.647972	-0.141074
cg21191365	chr14	90529014	90529015	+	0.04	0.346725	0.30312	0.441256	0.149611	0.343829	0.316908	0.435773	0.399522	0.507329	0.398679	0.374935	0.423248	-0.10634
cg21228424	chr6	42678314	42678315	+	0.028	0.500291	0.418785	0.58076	0.277504	0.492025	0.453873	0.541453	0.592411	0.717687	0.581428	0.498486	0.586293	-0.13242
cg21256200	chr22	24374012	24374013	-	0.05	0.453015	0.660125	0.515921	0.502465	0.652312	0.556768	0.646675	0.631664	0.738872	0.664105	0.632013	0.662666	-0.105898
cg21324402	chr6	31786808	31786809	-	0.011	0.493731	0.603933	0.385861	0.513001	0.55902	0.511109	0.611124	0.617855	0.677039	0.601951	0.600779	0.62175	-0.11064
cg21334598	chr12	117316490	117316491	-	0.03	0.283437	0.152333	0.280773	0.0669854	0.199796	0.196665	0.197599	0.29054	0.458525	0.321543	0.335434	0.320728	-0.124063
cg21401095	chr1	3078839	3078840	+	0.022	0.605724	0.559309	0.390282	0.872327	0.704285	0.626385	0.781482	0.811254	0.805489	0.854691	0.871282	0.824839	-0.198454
cg21415347	chr1	22777839	22777840	-	0.021	0.574796	0.76773	0.776187	0.657162	0.743698	0.703915	0.895281	0.767701	0.832307	0.7562	0.850564	0.820411	-0.116496
cg21459969	chr19	36343521	36343522	+	0.034	0.375562	0.385391	0.541285	0.312237	0.443569	0.411609	0.472536	0.451842	0.570768	0.51711	0.55813	0.514077	-0.102468
cg21464492	chr2	1691062	1691063	-	0.004	0.899317	0.901626	0.440168	0.601024	0.911936	0.750814	0.928182	0.916625	0.935457	0.925741	0.913822	0.923965	-0.173151
cg21474104	chr3	181721674	181721675	+	0.047	0.913925	0.278837	0.912015	0.907236	0.926167	0.787636	0.913651	0.934563	0.927404	0.911967	0.930972	0.923711	-0.136075
cg21547118	chr7	1447417	1447418	+	0.023	0.595375	0.619238	0.742273	0.591025	0.620769	0.633736	0.74178	0.696827	0.816249	0.702261	0.718802	0.735184	-0.101448
cg21551271	chr16	867552	867553	-	0	0.634688	0.538674	0.544123	0.499566	0.513917	0.546194	0.702059	0.669821	0.676517	0.673132	0.674999	0.679306	-0.133112
cg21590108	chr8	23609057	23609058	-	0.01	0.632604	0.576815	0.731945	0.469393	0.664684	0.615088	0.684269	0.690168	0.780607	0.739709	0.829905	0.744932	-0.129843
cg21697381	chr17	33759957	33759958	-	0.038	0.0994124	0.245067	0.210889	0.294868	0.354394	0.240926	0.418053	0.336411	0.445821	0.319412	0.244094	0.352759	-0.111833
cg21717348	chr7	45604317	45604318	+	0.036	0.200089	0.319222	0.369942	0.192806	0.336346	0.283681	0.419269	0.310516	0.552171	0.316704	0.402531	0.400238	-0.116557
cg21772953	chr3	23770435	23770436	+	0.001	0.675895	0.572453	0.683525	0.570024	0.600706	0.62052	0.712568	0.729689	0.73241	0.715736	0.805423	0.739165	-0.118645
cg21796547	chr14	73705457	73705458	+	0.012	0.474044	0.271387	0.414502	0.356006	0.350901	0.373368	0.492171	0.488516	0.568039	0.51834	0.402491	0.493911	-0.120543
cg21818470	chr2	177004975	177004976	-	0.024	0.585184	0.579217	0.722269	0.668335	0.619136	0.634828	0.69499	0.81954	0.772928	0.719412	0.67803	0.73698	-0.102152
cg21821308	chr2	9533606	9533607	+	0.031	0.589074	0.499662	0.671903	0.19604	0.513502	0.494036	0.608707	0.523291	0.859024	0.726388	0.684526	0.680387	-0.186351
cg21844144	chr11	68920550	68920551	+	0.024	0.697181	0.631015	0.793413	0.56429	0.70844	0.678868	0.752484	0.781849	0.858516	0.81645	0.733278	0.788515	-0.109648
cg21854895	chr17	71305638	71305639	-	0.008	0.705552	0.55836	0.73331	0.604262	0.6404	0.648377	0.742809	0.723318	0.816989	0.747479	0.716957	0.74951	-0.101134
cg21864959	chr1	11847863	11847864	+	0.004	0.648328	0.636191	0.671361	0.433415	0.619256	0.60171	0.72024	0.661014	0.780586	0.671669	0.681452	0.702992	-0.101282
cg21869609	chr19	2291613	2291614	-	0.004	0.08415	0.171821	0.229472	0.133368	0.169897	0.157742	0.195214	0.235524	0.451118	0.274861	0.260052	0.283354	-0.125612
cg21917448	chr1	20685179	20685180	+	0.025	0.498084	0.506263	0.668603	0.485779	0.501763	0.532099	0.576725	0.607389	0.703801	0.636556	0.712819	0.647458	-0.115359
cg21961149	chr15	37396505	37396506	-	0.012	0.648925	0.551911	0.669736	0.573516	0.561859	0.60119	0.85209	0.72947	0.826106	0.821794	0.604275	0.766747	-0.165557
cg22023531	chr15	45314915	45314916	-	0.005	0.474092	0.475892	0.442032	0.249141	0.432278	0.414687	0.572116	0.491081	0.459752	0.520471	0.53612	0.515908	-0.101221
cg22031783	chr1	3128606	3128607	-	0.018	0.456071	0.409937	0.520814	0.615601	0.483168	0.497118	0.565518	0.640865	0.619786	0.643426	0.599858	0.613891	-0.116773
cg22052514	chr8	142401722	142401723	+	0.028	0.0489215	0.246644	0.189706	0.320907	0.209639	0.203164	0.355408	0.30814	0.398867	0.311667	0.233106	0.321437	-0.118274
cg22112051	chr19	2290022	2290023	-	0.038	0.68973	0.473213	0.646421	0.479268	0.625669	0.58286	0.693322	0.677656	0.67734	0.739874	0.627737	0.683186	-0.100326
cg22121570	chr15	37176940	37176941	+	0.031	0.395946	0.285392	0.515551	0.260451	0.272736	0.346015	0.52289	0.455091	0.6111	0.51338	0.394631	0.499418	-0.153403
cg22126965	chr7	1015501	1015502	+	0.003	0.626492	0.492103	0.659483	0.639253	0.533285	0.590123	0.680276	0.664299	0.736003	0.669337	0.763894	0.702762	-0.112639
cg22207405	chr2	70853907	70853908	-	0.041	0.814163	0.636251	0.759326	0.614431	0.601346	0.685103	0.708173	0.761729	0.840299	0.78452	0.836319	0.786208	-0.101105
cg22215508	chr4	26024198	26024199	+	0.007	0.547254	0.409861	0.495184	0.370279	0.481253	0.460766	0.562552	0.55701	0.610982	0.568328	0.542994	0.568373	-0.107607
cg22230229	chr17	79372254	79372255	-	0.043	0.108883	0.100943	0.119221	0.0772632	0.136076	0.108477	0.148781	0.192735	0.428169	0.21979	0.0740488	0.212705	-0.104227
cg22231101	chr4	6052554	6052555	+	0.017	0.460179	0.541349	0.61723	0.180804	0.559554	0.471823	0.587597	0.585486	0.854259	0.646519	0.593992	0.65357	-0.181747
cg22236066	chr8	103742123	103742124	-	0.011	0.562256	0.427123	0.596891	0.382424	0.521264	0.497991	0.620661	0.625256	0.684137	0.594885	0.630635	0.631115	-0.133123
cg22237425	chr17	738822	738823	-	0.031	0.512227	0.417162	0.58508	0.364367	0.448762	0.46552	0.538936	0.512442	0.595959	0.522058	0.681973	0.570273	-0.104754
cg22252999	chr4	76996414	76996415	-	0.021	0.792923	0.726154	0.810835	0.803536	0.780415	0.782773	0.703296	0.699568	0.536698	0.649374	0.713224	0.660432	0.122341
cg22275125	chr11	62783573	62783574	-	0.038	0.275504	0.322384	0.405901	0.146751	0.347599	0.299628	0.349754	0.347539	0.580511	0.402067	0.407831	0.41754	-0.117912
cg22354618	chr18	8800458	8800459	+	0.017	0.729555	0.765217	0.877596	0.748227	0.739677	0.772054	0.909668	0.830738	0.89665	0.827947	0.895952	0.872191	-0.100137
cg22356726	chr10	91597320	91597321	+	0	0.133518	0.124339	0.15861	0.122955	0.122572	0.132399	0.232352	0.222506	0.25215	0.209385	0.307209	0.24472	-0.112321
cg22364219	chr1	16714091	16714092	+	0.022	0.415482	0.33608	0.450939	0.227376	0.280802	0.342136	0.447723	0.438308	0.462646	0.40594	0.501194	0.451162	-0.109026
cg22381154	chr8	2212328	2212329	-	0.042	0.484459	0.175198	0.621427	0.241755	0.150555	0.334679	0.520494	0.587884	0.597288	0.497767	0.54567	0.54982	-0.215142
cg22388948	chr6	82460558	82460559	-	0.023	0.398836	0.388891	0.477127	0.214717	0.427869	0.381488	0.405301	0.490019	0.611356	0.480086	0.571737	0.5117	-0.130212
cg22391718	chr1	110326285	110326286	-	0.049	0.80754	0.664977	0.788511	0.475332	0.715643	0.690401	0.76843	0.770165	0.876068	0.800466	0.778358	0.798698	-0.108297
cg22395335	chr1	147851370	147851371	+	0.036	0.576239	0.514602	0.680365	0.646937	0.624177	0.608464	0.610194	0.699024	0.725775	0.688274	0.950307	0.734715	-0.126251
cg22436429	chr1	36043084	36043085	+	0	0.47133	0.470416	0.393806	0.402909	0.480738	0.44384	0.556127	0.58946	0.694277	0.5727	0.506551	0.583823	-0.139983
cg22443212	chr17	78253912	78253913	-	0.016	0.418309	0.443624	0.511941	0.344605	0.375368	0.418769	0.41551	0.581377	0.515495	0.587864	0.746362	0.569322	-0.150552
cg22481950	chr6	161395786	161395787	-	0.013	0.487421	0.423882	0.579112	0.40974	0.431103	0.466252	0.543214	0.56023	0.67281	0.564149	0.636893	0.595459	-0.129207
cg22508928	chr1	10710134	10710135	-	0.036	0.357697	0.277026	0.46448	0.550997	0.332718	0.396584	0.481099	0.493324	0.586188	0.538337	0.462037	0.512197	-0.115614
cg22517801	chr7	157453790	157453791	-	0.027	0.779188	0.710945	0.878625	0.715452	0.731344	0.763111	0.814399	0.832681	0.935925	0.868864	0.90121	0.870616	-0.107505
cg22531668	chr10	118891601	118891602	+	0.003	0.434902	0.503412	0.530131	0.540001	0.499513	0.501592	0.693385	0.625253	0.591666	0.599185	0.55894	0.613686	-0.112094
cg22539450	chr2	73152975	73152976	-	0.046	0.122238	0.158447	0.293152	0.119164	0.12561	0.163722	0.232272	0.279052	0.470612	0.27665	0.170978	0.285913	-0.12219
cg22612448	chr1	217203173	217203174	+	0.018	0.244624	0.306913	0.406317	0.34032	0.326945	0.325024	0.378492	0.465092	0.347568	0.409187	0.557389	0.431546	-0.106522
cg22621161	chr10	116654257	116654258	+	0.043	0.458696	0.538965	0.584947	0.45519	0.855569	0.578673	0.867733	0.844629	0.912211	0.858662	0.511585	0.798964	-0.220291
cg22676075	chr6	135203613	135203614	+	0.046	0.185571	0.209124	0.229393	0.124003	0.206076	0.190833	0.879024	0.34684	0.195451	0.44085	0.18835	0.410103	-0.21927
cg22685052	chr1	22777719	22777720	+	0.004	0.543689	0.799597	0.780997	0.61212	0.7477	0.696821	0.907818	0.806285	0.89016	0.839909	0.887158	0.866266	-0.169445
cg22731215	chr1	149403965	149403966	+	0.03	0.812436	0.611098	0.694859	0.904597	0.768512	0.7583	0.873503	0.889814	0.841257	0.891385	0.882939	0.87578	-0.117479
cg22736807	chr5	92938149	92938150	-	0.025	0.44735	0.447545	0.593081	0.274068	0.473796	0.447168	0.54262	0.521341	0.693185	0.551062	0.549731	0.571588	-0.12442
cg22753382	chr4	3660005	3660006	+	0.01	0.334358	0.320569	0.49041	0.433896	0.459406	0.407728	0.4897	0.539335	0.591085	0.50115	0.460871	0.516428	-0.1087
cg22789318	chr17	981643	981644	+	0.011	0.728169	0.591508	0.661977	0.545088	0.571895	0.619727	0.874272	0.767901	0.810608	0.835984	0.644237	0.7866	-0.166873
cg22790377	chr1	228291668	228291669	+	0.017	0.354093	0.476245	0.496864	0.406632	0.497474	0.446262	0.517647	0.54954	0.459379	0.55046	0.65642	0.546689	-0.100428
cg22794716	chr12	113149064	113149065	+	0.037	0.708767	0.641336	0.82215	0.588459	0.617663	0.675675	0.714287	0.796964	0.816339	0.757976	0.855344	0.788182	-0.112507
cg22812614	chr6	32713827	32713828	+	0.007	0.834945	0.837955	0.867359	0.903502	0.865096	0.861771	0.701641	0.773755	0.601827	0.74018	0.70581	0.704643	0.157129
cg22822395	chr3	182434233	182434234	-	0.029	0.779264	0.755679	0.730738	0.47181	0.788169	0.705132	0.748649	0.813733	0.871124	0.814253	0.789173	0.807386	-0.102254
cg22846914	chrX	25041258	25041259	-	0.044	0.168665	0.218703	0.398104	0.0577217	0.174585	0.203556	0.363044	0.358284	0.616716	0.398796	0.194858	0.38634	-0.182784
cg22955387	chrX	133680468	133680469	+	0.033	0.724266	0.456802	0.548015	0.467373	0.547682	0.548828	0.668209	0.706838	0.722252	0.731855	0.558157	0.677462	-0.128635
cg22968622	chr17	43663579	43663580	+	0.003	0.0138077	0.0194341	0.018081	0.0172488	0.0173735	0.017189	0.563316	0.467476	0.499036	0.487237	0.0201287	0.407439	-0.39025
cg22968966	chr16	22959875	22959876	+	0.006	0.313665	0.189576	0.279712	0.114444	0.182573	0.215994	0.351418	0.312071	0.308714	0.302944	0.454687	0.345967	-0.129973
cg22971501	chr19	11199476	11199477	+	0.041	0.604745	0.344075	0.629235	0.366164	0.412401	0.471324	0.676502	0.562733	0.495448	0.577776	0.710518	0.604595	-0.133271
cg22978515	chr3	184037588	184037589	-	0.009	0.432601	0.28406	0.471194	0.387626	0.357026	0.386501	0.504622	0.480638	0.520121	0.456903	0.53723	0.499903	-0.113401
cg23004409	chr17	43128367	43128368	+	0.014	0.407468	0.35064	0.458116	0.36889	0.455985	0.40822	0.470623	0.480101	0.591702	0.451219	0.56696	0.512121	-0.103901
cg23026543	chr7	70203221	70203222	-	0.023	0.66032	0.504443	0.732292	0.587331	0.591961	0.61527	0.70235	0.699229	0.752583	0.673664	0.773499	0.720265	-0.104996
cg23026554	chr10	42862978	42862979	-	0.017	0.0530365	0.0841155	0.0322208	0.019823	0.0414847	0.0461361	0.276955	0.17865	0.0172926	0.222035	0.453805	0.229748	-0.183612
cg23058037	chr7	158824108	158824109	-	0.045	0.283684	0.321326	0.441109	0.213053	0.371059	0.326046	0.408211	0.398801	0.584534	0.432523	0.360775	0.436969	-0.110923
cg23146663	chr5	151066662	151066663	+	0.01	0.203908	0.112938	0.217608	0.110547	0.123573	0.153715	0.321325	0.252183	0.318877	0.267082	0.181767	0.268247	-0.114532
cg23245720	chrX	133680549	133680550	+	0.002	0.372069	0.316738	0.374405	0.242826	0.363809	0.333969	0.631126	0.573027	0.456386	0.606598	0.469728	0.547373	-0.213404
cg23301462	chr8	87757285	87757286	+	0.005	0.639539	0.581676	0.653574	0.358898	0.489549	0.544647	0.703667	0.663827	0.679606	0.697266	0.640923	0.677058	-0.132411
cg23392845	chr7	2660962	2660963	+	0.003	0.281661	0.298529	0.290204	0.203899	0.310821	0.277023	0.386951	0.35641	0.40348	0.401864	0.404041	0.390549	-0.113526
cg23425533	chr5	80529187	80529188	-	0.045	0.154467	0.245627	0.417679	0.14948	0.259188	0.245288	0.311516	0.345746	0.421509	0.304713	0.456656	0.368028	-0.12274
cg23445114	chr17	3884849	3884850	-	0.015	0.896075	0.788442	0.796561	0.891253	0.834731	0.841412	0.734038	0.788901	0.667476	0.756241	0.75082	0.739495	0.101917
cg23473396	chrX	25041134	25041135	+	0.029	0.278092	0.303834	0.472304	0.167744	0.289624	0.30232	0.496398	0.432461	0.705359	0.46447	0.317328	0.483203	-0.180883
cg23480619	chr21	35831871	35831872	-	0.008	0.0732069	0.167793	0.135219	0.0998301	0.0212165	0.0994531	0.346791	0.179754	0.235629	0.231878	0.134667	0.225744	-0.126291
cg23497383	chr2	239140182	239140183	+	0.019	0.0160701	0.0408017	0.0263023	0.0216709	0.0394726	0.0288635	0.359253	0.175481	0.366038	0.183738	0.0233713	0.221576	-0.192713
cg23530266	chr11	16132747	16132748	-	0.028	0.719116	0.604588	0.695997	0.494008	0.63343	0.629428	0.739574	0.74612	0.797129	0.724132	0.668979	0.735187	-0.105759
cg23601468	chr22	33200307	33200308	+	0.026	0.675786	0.518552	0.623039	0.477236	0.56464	0.571851	0.674625	0.682286	0.783308	0.712625	0.591	0.688769	-0.116918
cg23616741	chr7	44105434	44105435	-	0.003	0.311528	0.268219	0.368315	0.232948	0.299071	0.296016	0.369502	0.394154	0.419355	0.374699	0.43919	0.39938	-0.103364
cg23831517	chr8	34182528	34182529	-	0.017	0.588182	0.489035	0.659423	0.500776	0.542023	0.555888	0.646463	0.656885	0.634261	0.654798	0.690058	0.656493	-0.100605
cg23851088	chrX	40004432	40004433	+	0.006	0.459343	0.376613	0.453874	0.303324	0.400451	0.398721	0.489818	0.451645	0.519553	0.522988	0.532888	0.503378	-0.104657
cg23875391	chr18	72120615	72120616	-	0.02	0.570324	0.463803	0.586469	0.441696	0.544153	0.521289	0.649793	0.636959	0.655605	0.626886	0.540273	0.621903	-0.100614
cg23893620	chr4	20884385	20884386	+	0.047	0.0931377	0.191661	0.234931	0.367967	0.204721	0.218484	0.32817	0.302846	0.456949	0.310576	0.236682	0.327045	-0.108561
cg23908228	chr21	35832008	35832009	+	0.007	0.0840145	0.133705	0.0903006	0.180872	0.0429014	0.106359	0.31781	0.200125	0.229194	0.192774	0.148426	0.217666	-0.111307
cg23914535	chr11	87885119	87885120	-	0.001	0.605186	0.622359	0.715339	0.703526	0.647325	0.658747	0.807244	0.741406	0.766357	0.719142	0.826232	0.772076	-0.113329
cg23981172	chr14	48146158	48146159	+	0.044	0.559862	0.688467	0.609073	0.744205	0.650253	0.650372	0.533172	0.578795	0.546886	0.518319	0.553874	0.546209	0.104163
cg23986590	chr2	109934728	109934729	+	0.034	0.590854	0.62875	0.725444	0.539959	0.490269	0.595055	0.654067	0.647207	0.851248	0.679495	0.785854	0.723574	-0.128519
cg24000797	chr1	153974332	153974333	+	0.016	0.151943	0.225643	0.362026	0.182757	0.200742	0.224622	0.285459	0.308119	0.504084	0.3183	0.51252	0.385696	-0.161074
cg24025550	chr15	59157523	59157524	-	0.03	0.0894017	0.208255	0.266479	0.147873	0.200111	0.182424	0.203679	0.243133	0.494574	0.303411	0.238636	0.296687	-0.114263
cg24079051	chr2	239140485	239140486	+	0.003	0.155019	0.189739	0.262781	0.26392	0.206194	0.215531	0.453717	0.373967	0.55741	0.374468	0.278049	0.407522	-0.191992
cg24090911	chr5	400732	400733	+	0.006	0.647973	0.595377	0.67078	0.470272	0.627815	0.602443	0.664431	0.682609	0.81331	0.698483	0.705146	0.712796	-0.110352
cg24092939	chr12	49181056	49181057	+	0.002	0.341003	0.321541	0.402309	0.265446	0.344646	0.334989	0.454436	0.440366	0.380894	0.41349	0.528782	0.443594	-0.108605
cg24121069	chr13	114202741	114202742	-	0.018	0.225816	0.281636	0.416609	0.229585	0.355459	0.301821	0.332467	0.405902	0.494376	0.47691	0.493465	0.440624	-0.138803
cg24139837	chrX	3730151	3730152	+	0.021	0.037227	0.0387385	0.04626	0.0524431	0.0428408	0.0435019	0.596362	0.284774	0.387734	0.306534	0.0393624	0.322953	-0.279451
cg24147543	chr6	32554481	32554482	-	0.008	0.460951	0.0333713	0.0354315	0.0309518	0.038533	0.119848	0.537737	0.342874	0.550506	0.366544	0.369367	0.433406	-0.313558
cg24159247	chr3	4575483	4575484	+	0.018	0.203454	0.159768	0.325474	0.145855	0.237643	0.214439	0.237205	0.301784	0.43584	0.330536	0.341595	0.329392	-0.114953
cg24159514	chr19	11785248	11785249	+	0.002	0.194506	0.163551	0.0907472	0.0341643	0.0649597	0.109586	0.299432	0.215825	0.435483	0.292518	0.209783	0.290608	-0.181023
cg24181856	chr13	113105341	113105342	+	0	0.583866	0.723189	0.77446	0.632346	0.738403	0.690453	0.795169	0.825842	0.783232	0.788819	0.804442	0.799501	-0.109048
cg24183816	chr6	33294842	33294843	+	0.019	0.946406	0.941425	0.383334	0.930884	0.95344	0.831098	0.957798	0.955297	0.952565	0.949363	0.949057	0.952816	-0.121718
cg24201793	chr2	9144764	9144765	+	0.015	0.354551	0.328559	0.402071	0.205422	0.325087	0.323138	0.400476	0.420713	0.503254	0.390194	0.453391	0.433606	-0.110468
cg24211006	chr20	39321346	39321347	+	0.009	0.108937	0.194273	0.196572	0.147176	0.210579	0.171507	0.285278	0.260139	0.301265	0.306128	0.207565	0.272075	-0.100568
cg24235633	chr16	29875177	29875178	-	0.011	0.570348	0.560163	0.67111	0.571743	0.640618	0.602797	0.640766	0.695683	0.779991	0.727975	0.748759	0.718635	-0.115838
cg24323958	chr1	108741884	108741885	-	0.013	0.61911	0.453762	0.554876	0.342369	0.609478	0.515919	0.673164	0.60692	0.680487	0.606561	0.624909	0.638408	-0.122489
cg24334512	chr15	94346887	94346888	+	0.03	0.542047	0.71531	0.796746	0.650363	0.675935	0.67608	0.784547	0.731289	0.837622	0.747458	0.787256	0.777634	-0.101554
cg24367777	chr10	6828769	6828770	+	0.011	0.354181	0.426504	0.534608	0.340005	0.386282	0.408316	0.508771	0.544923	0.53667	0.52209	0.535456	0.529582	-0.121266
cg24375938	chr17	13505799	13505800	+	0.016	0.333213	0.262229	0.412826	0.17418	0.306424	0.297774	0.375479	0.411514	0.507269	0.432388	0.348529	0.415036	-0.117262
cg24393783	chr17	70123165	70123166	-	0.013	0.773524	0.494738	0.456297	0.524096	0.584329	0.566597	0.678148	0.70405	0.740319	0.729064	0.724673	0.715251	-0.148654
cg24401049	chrX	11157158	11157159	-	0.002	0.64461	0.666268	0.733648	0.694832	0.610157	0.669903	0.797318	0.767678	0.745075	0.743386	0.857402	0.782172	-0.112269
cg24421216	chr2	66782831	66782832	-	0.031	0.288104	0.29292	0.383154	0.33501	0.283942	0.316626	0.391003	0.415097	0.330245	0.338676	0.665711	0.428147	-0.111521
cg24470734	chr17	33759648	33759649	-	0.026	0.0848196	0.134334	0.063213	0.180832	0.225593	0.137758	0.366169	0.301047	0.623818	0.267067	0.0882482	0.32927	-0.191512
cg24474409	chr7	150021518	150021519	+	0.023	0.913481	0.736375	0.739799	0.648054	0.765079	0.760558	0.851096	0.842022	0.892856	0.874084	0.898595	0.87173	-0.111173
cg24516106	chr2	72079413	72079414	+	0.017	0.484397	0.475322	0.592817	0.485045	0.380968	0.48371	0.531761	0.599496	0.589936	0.586565	0.638934	0.589338	-0.105628
cg24527560	chr10	42863508	42863509	+	0.016	0.0898628	0.198896	0.0691079	0.096434	0.0867453	0.108209	0.321951	0.26437	0.0663684	0.245515	0.466046	0.27285	-0.164641
cg24529484	chr19	47933421	47933422	-	0.018	0.144889	0.183472	0.320442	0.103719	0.174138	0.185332	0.248631	0.277902	0.3579	0.273194	0.32049	0.295623	-0.110291
cg24534135	chr2	239140473	239140474	+	0.006	0.0609547	0.123034	0.137291	0.112826	0.122322	0.111286	0.217341	0.225309	0.407489	0.242783	0.127741	0.244132	-0.132847
cg24562110	chr13	80324480	80324481	+	0.048	0.570805	0.50881	0.682925	0.344915	0.501181	0.521727	0.576921	0.584971	0.739615	0.613951	0.680441	0.63918	-0.117453
cg24598948	chr10	42863539	42863540	+	0.043	0.136904	0.234173	0.105754	0.10333	0.107275	0.137487	0.370436	0.29724	0.0440986	0.271301	0.516229	0.299861	-0.162374
cg24633291	chr7	1024814	1024815	+	0.02	0.790697	0.480028	0.81934	0.858813	0.82723	0.755221	0.859921	0.839393	0.884246	0.830741	0.87687	0.858234	-0.103013
cg24679453	chr1	3079069	3079070	+	0	0.617024	0.639098	0.440334	0.665338	0.696949	0.611749	0.73515	0.776972	0.814917	0.748598	0.738158	0.762759	-0.15101
cg24685006	chr1	36043014	36043015	+	0.01	0.340455	0.379252	0.485352	0.184853	0.310487	0.34008	0.478631	0.48651	0.671992	0.522592	0.469534	0.525852	-0.185772
cg24694702	chr12	119617656	119617657	-	0.01	0.675752	0.516521	0.668176	0.467545	0.57986	0.581571	0.698542	0.654461	0.686134	0.688312	0.728122	0.691114	-0.109543
cg24702341	chr7	73895278	73895279	-	0.006	0.49936	0.436451	0.547039	0.343823	0.482041	0.461743	0.559853	0.570195	0.573821	0.598216	0.533496	0.567116	-0.105373
cg24749559	chr5	141616065	141616066	+	0.011	0.613704	0.618103	0.773605	0.666411	0.690546	0.672474	0.785455	0.781772	0.852697	0.796513	0.735595	0.790406	-0.117932
cg24751707	chr14	101830869	101830870	-	0.043	0.580986	0.489741	0.729705	0.567535	0.531984	0.57999	0.635203	0.660383	0.784159	0.661972	0.826719	0.713687	-0.133697
cg24805759	chr17	77997760	77997761	+	0.005	0.18615	0.356089	0.415689	0.261873	0.362554	0.316471	0.417951	0.412208	0.49836	0.442939	0.552356	0.464763	-0.148292
cg24847621	chr6	30122565	30122566	-	0.024	0.423204	0.49671	0.401421	0.50573	0.553814	0.476176	0.495594	0.578038	0.73629	0.53255	0.647458	0.597986	-0.12181
cg24898738	chr10	134938144	134938145	-	0.029	0.627628	0.550568	0.684557	0.566726	0.493226	0.584541	0.677092	0.689334	0.603181	0.680807	0.819796	0.694042	-0.109501
cg24905316	chr10	135186343	135186344	-	0.009	0.50815	0.572176	0.566703	0.563768	0.617286	0.565617	0.789586	0.699751	0.68581	0.722748	0.58694	0.696967	-0.13135
cg24913168	chr13	44971694	44971695	-	0.026	0.68434	0.772356	0.873584	0.740809	0.748782	0.763974	0.868118	0.823445	0.969397	0.821858	0.857309	0.868025	-0.104051
cg24940138	chr17	41363741	41363742	-	0.003	0.140129	0.129897	0.188947	0.0367776	0.163703	0.131891	0.183549	0.216117	0.404259	0.297474	0.276025	0.275485	-0.143594
cg24940967	chr3	45837197	45837198	-	0.012	0.423002	0.423652	0.463958	0.143762	0.396158	0.370106	0.496334	0.49887	0.749939	0.527015	0.409436	0.536319	-0.166212
cg24943627	chr18	35147826	35147827	+	0.043	0.218568	0.253399	0.34292	0.117479	0.301788	0.246831	0.346344	0.351848	0.542658	0.391458	0.214314	0.369324	-0.122494
cg24952123	chr4	100143367	100143368	-	0.05	0.488018	0.590351	0.544708	0.411787	0.551477	0.517268	0.686933	0.558973	0.538619	0.572691	0.742297	0.619903	-0.102634
cg24960960	chr5	1594678	1594679	-	0.042	0.015832	0.319196	0.017719	0.0194968	0.0183608	0.0781208	0.415491	0.348053	0.29096	0.357014	0.0179788	0.285899	-0.207779
cg24997986	chr8	67098906	67098907	-	0.014	0.188249	0.282563	0.355611	0.270743	0.186704	0.256774	0.385216	0.33281	0.358372	0.310659	0.417564	0.360924	-0.10415
cg25010691	chr7	2606716	2606717	-	0.014	0.407421	0.541807	0.382953	0.241664	0.506617	0.416092	0.510551	0.525512	0.797329	0.560437	0.553039	0.589374	-0.173281
cg25019503	chr11	44052211	44052212	+	0.007	0.551982	0.388608	0.469276	0.374576	0.484719	0.453832	0.528872	0.554005	0.649285	0.560401	0.545684	0.567649	-0.113817
cg25032321	chr13	99227533	99227534	-	0.028	0.512567	0.383055	0.494081	0.218347	0.421677	0.405945	0.565309	0.583544	0.697762	0.588889	0.418697	0.57084	-0.164895
cg25100962	chr12	31782808	31782809	+	0.002	0.737101	0.553358	0.722824	0.754218	0.626403	0.678781	0.811405	0.80629	0.87771	0.798189	0.78258	0.815235	-0.136454
cg25107000	chr6	31275643	31275644	-	0.004	0.654558	0.613951	0.650516	0.752514	0.574193	0.649146	0.877822	0.837722	0.82598	0.835801	0.846541	0.844773	-0.195627
cg25114611	chr6	35696870	35696871	-	0.031	0.777485	0.573148	0.820717	0.729596	0.652745	0.710738	0.784211	0.80556	0.807784	0.802281	0.859914	0.81195	-0.101212
cg25138553	chr1	22223841	22223842	+	0.04	0.802782	0.589897	0.767595	0.499875	0.642742	0.660578	0.83108	0.75905	0.836007	0.773908	0.712512	0.782511	-0.121934
cg25147158	chr4	165898707	165898708	+	0	0.0913172	0.227267	0.249852	0.192093	0.23655	0.199416	0.289625	0.301141	0.309934	0.311215	0.367427	0.315868	-0.116453
cg25189247	chr17	3697993	3697994	+	0.014	0.362691	0.543216	0.430205	0.3411	0.456995	0.426842	0.527629	0.500514	0.58664	0.516858	0.559959	0.53832	-0.111478
cg25219188	chr4	165898926	165898927	-	0.009	0.216248	0.309216	0.427414	0.345956	0.391895	0.338146	0.425985	0.427308	0.462074	0.437762	0.467146	0.444055	-0.105909
cg25223771	chr8	145105503	145105504	-	0.035	0.13143	0.172646	0.25661	0.105233	0.137589	0.160702	0.175068	0.208648	0.326086	0.248982	0.362827	0.264322	-0.103621
cg25298319	chr2	233217079	233217080	-	0.018	0.410668	0.270161	0.369528	0.0770572	0.15236	0.255955	0.426199	0.347737	0.457131	0.417193	0.427675	0.415187	-0.159232
cg25340688	chr5	135416398	135416399	+	0.014	0.553581	0.511204	0.520349	0.54682	0.0222056	0.430832	0.543917	0.555329	0.55512	0.572319	0.576858	0.560709	-0.129877
cg25386676	chr5	172175721	172175722	+	0.017	0.320548	0.515146	0.562795	0.487122	0.494288	0.47598	0.619134	0.552092	0.673119	0.541293	0.542944	0.585716	-0.109737
cg25394203	chr19	11784708	11784709	-	0.006	0.141531	0.127292	0.0897717	0.0657422	0.105072	0.105882	0.240618	0.19396	0.308106	0.187849	0.130955	0.212298	-0.106416
cg25417675	chr6	31651059	31651060	+	0.003	0.402547	0.375761	0.374176	0.254417	0.389154	0.359211	0.454334	0.476581	0.447061	0.53359	0.389407	0.460195	-0.100984
cg25449484	chr5	92929372	92929373	+	0.021	0.514966	0.499235	0.65617	0.385156	0.574507	0.526007	0.637377	0.630004	0.769116	0.648743	0.617945	0.660637	-0.13463
cg25489524	chr15	65127973	65127974	-	0.012	0.292586	0.296216	0.289572	0.105492	0.271224	0.251018	0.274786	0.342158	0.378147	0.326444	0.434702	0.351247	-0.100229
cg25495534	chr10	65431222	65431223	-	0.037	0.710506	0.519462	0.666227	0.434672	0.600289	0.586231	0.687083	0.708156	0.738554	0.678786	0.642043	0.690924	-0.104693
cg25538415	chr17	43129957	43129958	-	0.021	0.320633	0.455357	0.545538	0.558696	0.507882	0.477621	0.604299	0.597383	0.543991	0.628876	0.53037	0.580984	-0.103362
cg25575458	chr3	39821421	39821422	+	0.023	0.729616	0.862314	0.980672	0.811543	0.797589	0.836347	0.971528	0.922645	0.980351	0.931437	0.981389	0.95747	-0.121123
cg25599475	chr7	853038	853039	+	0.028	0.237384	0.174737	0.324787	0.0672279	0.25996	0.212819	0.317248	0.273681	0.388521	0.321112	0.271951	0.314503	-0.101684
cg25612754	chr7	948567	948568	-	0.004	0.193789	0.231328	0.335023	0.182734	0.297411	0.248057	0.503476	0.34856	0.429555	0.393108	0.656406	0.466221	-0.218164
cg25615184	chr5	180531373	180531374	+	0.048	0.285712	0.31023	0.447988	0.32983	0.286216	0.331995	0.333225	0.42524	0.585637	0.422381	0.428696	0.439036	-0.107041
cg25631414	chr6	169641941	169641942	+	0.028	0.596465	0.800302	0.837587	0.928864	0.893631	0.81137	0.936585	0.912948	0.955994	0.895922	0.92258	0.924806	-0.113436
cg25661571	chr17	63543769	63543770	+	0.016	0.363362	0.42456	0.433613	0.401107	0.53364	0.431256	0.54859	0.519375	0.60558	0.517302	0.490931	0.536356	-0.105099
cg25708755	chr7	157951411	157951412	+	0.008	0.758567	0.861447	0.672553	0.888153	0.782	0.792544	0.889377	0.886982	0.969871	0.882703	0.970984	0.919983	-0.127439
cg25714115	chr7	73895061	73895062	-	0.029	0.293768	0.325629	0.456355	0.20778	0.370656	0.330838	0.427609	0.399315	0.503423	0.422136	0.43693	0.437883	-0.107045
cg25724260	chr7	42896970	42896971	+	0.009	0.434729	0.279416	0.24716	0.183383	0.278814	0.2847	0.438662	0.400851	0.411681	0.421013	0.476167	0.429675	-0.144974
cg25726756	chr21	47582351	47582352	-	0.01	0.774697	0.743712	0.471715	0.552274	0.700631	0.648606	0.906197	0.773113	0.82727	0.82601	0.739666	0.814451	-0.165845
cg25741487	chr3	62363076	62363077	+	0.043	0.200428	0.367668	0.502728	0.398838	0.348316	0.363596	0.584537	0.492435	0.622565	0.510393	0.346564	0.511299	-0.147703
cg25757470	chr12	11760705	11760706	-	0.027	0.691245	0.608786	0.791226	0.552461	0.641191	0.656982	0.71684	0.752077	0.839454	0.741723	0.828098	0.775638	-0.118657
cg25769566	chr6	31651278	31651279	+	0.01	0.687401	0.526603	0.636223	0.456764	0.586594	0.578717	0.667658	0.682308	0.714821	0.717465	0.676528	0.691756	-0.113039
cg25844605	chr20	5485475	5485476	+	0.002	0.422641	0.475575	0.542263	0.292507	0.410467	0.428691	0.67115	0.562761	0.818328	0.638114	0.728123	0.683695	-0.255005
cg25851789	chr1	217309794	217309795	-	0.011	0.225192	0.306277	0.421259	0.182196	0.263389	0.279662	0.386653	0.40513	0.490961	0.443635	0.372507	0.419777	-0.140115
cg25903143	chr11	68920466	68920467	-	0.006	0.59139	0.508718	0.648095	0.562852	0.6206	0.586331	0.667038	0.717383	0.800585	0.734981	0.62935	0.709868	-0.123537
cg25925210	chr2	219576383	219576384	+	0.001	0.29721	0.134291	0.165378	0.210563	0.179727	0.197434	0.391076	0.309804	0.281901	0.323345	0.315577	0.324341	-0.126907
cg25946646	chr10	88628344	88628345	-	0.032	0.712776	0.521191	0.740566	0.544498	0.613916	0.626589	0.734737	0.692679	0.853014	0.743568	0.715197	0.747839	-0.12125
cg25987564	chr4	6010075	6010076	+	0.007	0.594058	0.563999	0.566782	0.386545	0.281412	0.478559	0.593096	0.57543	0.595771	0.591742	0.600136	0.591235	-0.112675
cg26022183	chr1	156215655	156215656	-	0.011	0.0458557	0.127501	0.174952	0.029366	0.110132	0.0975614	0.178248	0.210463	0.306296	0.21317	0.120223	0.20568	-0.108119
cg26035105	chr2	121105464	121105465	-	0.016	0.258865	0.262758	0.407429	0.267339	0.347889	0.308856	0.414561	0.439398	0.483443	0.379502	0.382494	0.41988	-0.111024
cg26051590	chrX	117107897	117107898	+	0.008	0.28508	0.403177	0.440656	0.499449	0.407143	0.407101	0.54563	0.526725	0.485732	0.552861	0.510657	0.524321	-0.11722
cg26063721	chr6	34499488	34499489	-	0.03	0.73981	0.775138	0.76255	0.777941	0.524806	0.716049	0.778255	0.756932	0.877759	0.787212	0.885202	0.817072	-0.101023
cg26081071	chr13	20701668	20701669	-	0.03	0.601131	0.449375	0.583046	0.349661	0.425708	0.481784	0.545877	0.587366	0.648645	0.556869	0.689512	0.605654	-0.12387
cg26105558	chr20	55101313	55101314	+	0.008	0.321805	0.54744	0.400716	0.494073	0.493175	0.451442	0.573371	0.566401	0.588828	0.532272	0.607705	0.573715	-0.122274
cg26116937	chr10	531152	531153	+	0.009	0.461278	0.44034	0.501522	0.265345	0.461737	0.426044	0.522537	0.491555	0.604762	0.529217	0.497947	0.529204	-0.103159
cg26117369	chr13	113104975	113104976	+	0.017	0.869802	0.887961	0.902897	0.858892	0.870861	0.878083	0.760119	0.794253	0.670152	0.76179	0.856351	0.768533	0.10955
cg26129027	chrX	38662279	38662280	+	0.024	0.597459	0.532102	0.669115	0.52397	0.514754	0.56748	0.71325	0.691986	0.521163	0.696655	0.799338	0.684478	-0.116998
cg26135849	chr8	141359539	141359540	-	0.01	0.509866	0.491734	0.634426	0.515162	0.378716	0.505981	0.719253	0.613394	0.695115	0.62268	0.742994	0.678687	-0.172706
cg26181334	chr7	4832535	4832536	+	0.037	0.644663	0.489589	0.590693	0.393938	0.505223	0.524821	0.603498	0.623548	0.748689	0.627804	0.598168	0.640342	-0.11552
cg26185508	chr1	54619445	54619446	-	0.013	0.53159	0.469049	0.636468	0.453581	0.599812	0.5381	0.60721	0.606046	0.687604	0.660414	0.639319	0.640118	-0.102018
cg26197915	chr11	48085137	48085138	-	0.027	0.440489	0.459276	0.556281	0.235586	0.527558	0.443838	0.576247	0.569644	0.725523	0.578935	0.491587	0.588387	-0.144549
cg26202753	chr7	1850203	1850204	-	0.001	0.680664	0.609834	0.70266	0.683626	0.600265	0.65541	0.760823	0.820267	0.840614	0.796342	0.742753	0.79216	-0.13675
cg26211724	chr18	57636670	57636671	-	0.018	0.637007	0.52222	0.535941	0.495933	0.505493	0.539319	0.662856	0.632524	0.557697	0.608391	0.755354	0.643364	-0.104045
cg26244164	chr8	12987449	12987450	-	0.012	0.691511	0.503495	0.754269	0.615884	0.680571	0.649146	0.76497	0.767337	0.833894	0.827836	0.682976	0.775403	-0.126257
cg26244646	chr17	59391924	59391925	+	0.043	0.765614	0.548212	0.729265	0.452373	0.614742	0.622041	0.727501	0.709985	0.774002	0.763081	0.751622	0.745238	-0.123197
cg26287152	chr17	77923675	77923676	+	0.017	0.610966	0.647288	0.700743	0.645995	0.749813	0.670961	0.773042	0.887773	0.700407	0.899375	0.713608	0.794841	-0.12388
cg26302986	chr7	90291360	90291361	+	0.032	0.572403	0.441703	0.713232	0.454436	0.522625	0.54088	0.659152	0.623262	0.730611	0.647347	0.700545	0.672183	-0.131304
cg26311262	chr3	56858039	56858040	+	0.037	0.492913	0.395343	0.580147	0.286376	0.430938	0.437143	0.547758	0.520818	0.517832	0.533582	0.567823	0.537563	-0.100419
cg26312807	chr3	127057048	127057049	-	0.041	0.453489	0.246312	0.240821	0.272654	0.11296	0.265247	0.426566	0.415591	0.401269	0.458537	0.281548	0.396702	-0.131455
cg26343358	chr6	31275666	31275667	+	0.004	0.600034	0.594748	0.645729	0.689731	0.567227	0.619494	0.869328	0.814175	0.796941	0.820398	0.814138	0.822996	-0.203502
cg26394257	chr8	38964993	38964994	-	0.014	0.230172	0.237018	0.316746	0.159128	0.228777	0.234368	0.367542	0.298613	0.312249	0.295055	0.399195	0.334531	-0.100162
cg26416971	chr5	80529100	80529101	+	0.032	0.117856	0.173421	0.276033	0.0997427	0.191015	0.171613	0.204758	0.237747	0.329259	0.252573	0.405552	0.285978	-0.114364
cg26451735	chr15	74494900	74494901	+	0.011	0.162469	0.18003	0.43111	0.196889	0.193621	0.232824	0.473442	0.301252	0.400818	0.384502	0.542754	0.420554	-0.18773
cg26517831	chr7	2768566	2768567	+	0.031	0.5797	0.645547	0.614824	0.81586	0.713755	0.673937	0.774762	0.787584	0.931481	0.762799	0.723782	0.796081	-0.122144
cg26543657	chr1	26488949	26488950	-	0.023	0.385959	0.323161	0.531982	0.384516	0.494932	0.42411	0.559664	0.560036	0.70838	0.661663	0.437734	0.585495	-0.161385
cg26546373	chr5	154095163	154095164	-	0.045	0.650404	0.528163	0.766864	0.54084	0.600385	0.617331	0.685292	0.667441	0.77809	0.683033	0.804173	0.723606	-0.106275
cg26548293	chr1	153606178	153606179	+	0.001	0.37642	0.486958	0.486978	0.417927	0.4769	0.449037	0.550256	0.52287	0.511393	0.524576	0.645276	0.550874	-0.101837
cg26552774	chr15	44092398	44092399	-	0.017	0.455588	0.60039	0.644482	0.493944	0.573384	0.553558	0.63225	0.643886	0.671664	0.623274	0.731597	0.660534	-0.106977
cg26621607	chr12	133180238	133180239	+	0.019	0.316545	0.37134	0.603868	0.317812	0.405978	0.403108	0.593377	0.511989	0.551225	0.535011	0.583399	0.555	-0.151892
cg26676468	chr5	112539223	112539224	+	0.044	0.213507	0.433677	0.503841	0.64468	0.357913	0.430724	0.551159	0.554148	0.870802	0.570823	0.584669	0.62632	-0.195597
cg26686147	chr4	129474397	129474398	+	0.028	0.145023	0.279953	0.377817	0.163103	0.144798	0.222139	0.29117	0.312588	0.54349	0.29727	0.428955	0.374695	-0.152556
cg26691059	chr12	133265865	133265866	-	0.041	0.361032	0.460777	0.516121	0.356276	0.378925	0.414626	0.543288	0.49108	0.38745	0.5116	0.653479	0.51738	-0.102753
cg26727768	chr15	37178201	37178202	-	0.011	0.447527	0.464576	0.520741	0.322989	0.426155	0.436398	0.596254	0.559824	0.666781	0.629407	0.462651	0.582984	-0.146586
cg26783057	chr10	118891670	118891671	+	0.02	0.0787946	0.26905	0.377879	0.362224	0.313032	0.280196	0.649039	0.452945	0.455451	0.468131	0.309511	0.467016	-0.18682
cg26791665	chr1	19217189	19217190	+	0.041	0.653506	0.483392	0.688757	0.458501	0.529357	0.562703	0.615409	0.63996	0.720265	0.651738	0.768388	0.679152	-0.116449
cg26799416	chr22	42611379	42611380	+	0.006	0.345594	0.358982	0.462805	0.371435	0.357233	0.37921	0.431761	0.480423	0.607469	0.471506	0.508322	0.499896	-0.120686
cg26827725	chr16	81271937	81271938	+	0.041	0.444681	0.522706	0.614294	0.360238	0.582899	0.504964	0.59631	0.58881	0.685217	0.599311	0.605601	0.61505	-0.110086
cg26848724	chr13	31326405	31326406	+	0.008	0.528828	0.621643	0.655343	0.526911	0.563083	0.579162	0.672567	0.619559	0.798795	0.706799	0.667483	0.69304	-0.113879
cg26874693	chr12	111618936	111618937	-	0.006	0.390369	0.35874	0.468716	0.370968	0.376487	0.393056	0.458781	0.511489	0.588749	0.496945	0.46902	0.504997	-0.111941
cg26923084	chr14	52536893	52536894	+	0.026	0.547968	0.625245	0.722104	0.412773	0.671963	0.596011	0.702508	0.662678	0.810135	0.722034	0.772805	0.734032	-0.138022
cg26960322	chr2	237479015	237479016	+	0.041	0.624378	0.422241	0.656627	0.353359	0.443154	0.499952	0.637115	0.591645	0.785417	0.681961	0.517305	0.642689	-0.142737
cg26975184	chr7	140267040	140267041	-	0.01	0.784198	0.677569	0.702721	0.558302	0.674434	0.679445	0.765874	0.762008	0.824327	0.796633	0.808653	0.791499	-0.112054
cg26978172	chr6	31696223	31696224	+	0.006	0.501557	0.506412	0.593122	0.496048	0.541356	0.527699	0.715436	0.591945	0.627691	0.681544	0.613423	0.646008	-0.118309
cg27046335	chr5	35198290	35198291	+	0.036	0.142313	0.271497	0.390191	0.215792	0.243678	0.252694	0.323289	0.332781	0.38744	0.309429	0.413759	0.35334	-0.100645
cg27055313	chr14	106025958	106025959	-	0.045	0.596869	0.194479	0.233135	0.574568	0.189012	0.357613	0.480951	0.584496	0.535781	0.541198	0.827875	0.59406	-0.236448
cg27071793	chr6	31275718	31275719	+	0.003	0.4773	0.460401	0.491631	0.577389	0.378097	0.476964	0.732206	0.650953	0.592941	0.630241	0.596876	0.640643	-0.16368
cg27073142	chr15	45314933	45314934	-	0.001	0.200088	0.191288	0.193056	0.0518966	0.170431	0.161352	0.342938	0.256327	0.241958	0.311186	0.349234	0.300328	-0.138977
cg27117982	chr12	16500077	16500078	+	0.038	0.331521	0.400908	0.587912	0.500297	0.461775	0.456483	0.510893	0.52361	0.649696	0.548615	0.649062	0.576375	-0.119893
cg27119318	chr21	40759574	40759575	-	0.002	0.41971	0.356579	0.352723	0.0332228	0.239416	0.28033	0.44598	0.421868	0.394054	0.444681	0.503756	0.442068	-0.161737
cg27119456	chr10	42863173	42863174	-	0.017	0.0300134	0.0692337	0.0351899	0.023521	0.0523919	0.04207	0.209774	0.176893	0.0226451	0.199496	0.469194	0.2156	-0.17353
cg27134251	chr8	1365049	1365050	-	0.001	0.481104	0.516641	0.537883	0.241301	0.237359	0.402858	0.553318	0.607439	0.666386	0.618626	0.569123	0.602978	-0.200121
cg27149073	chr5	1594330	1594331	+	0.043	0.0395532	0.446191	0.0518713	0.0511589	0.0481811	0.127391	0.486806	0.42867	0.48383	0.442916	0.0540763	0.37926	-0.251868
cg27171569	chr16	83987465	83987466	-	0.023	0.494589	0.474242	0.731989	0.717818	0.580646	0.599857	0.81191	0.717467	0.822159	0.691287	0.736494	0.755863	-0.156007
cg27230472	chr16	78601767	78601768	-	0.027	0.630455	0.684585	0.806308	0.787022	0.658477	0.71337	0.843711	0.836564	0.884989	0.840597	0.743567	0.829886	-0.116516
cg27258561	chr6	31275767	31275768	-	0.001	0.474872	0.415727	0.447792	0.508029	0.370106	0.443305	0.746285	0.628706	0.590895	0.634434	0.578423	0.635749	-0.192443
cg27307781	chr21	37442289	37442290	+	0	0.00970435	0.0113459	0.010946	0.00993443	0.0102232	0.0104308	0.0196356	0.101451	0.355629	0.160783	0.0164777	0.130795	-0.120364
cg27350104	chr11	70958638	70958639	-	0.037	0.614303	0.455037	0.647635	0.451177	0.5347	0.54057	0.620158	0.618596	0.692756	0.631793	0.642909	0.641242	-0.100672
cg27378537	chr5	1594863	1594864	-	0.035	0.0447051	0.312704	0.0597514	0.0622494	0.0610958	0.108101	0.365612	0.304884	0.381768	0.347813	0.0571467	0.291445	-0.183343
cg27395066	chr17	43221220	43221221	-	0.023	0.369541	0.239911	0.38824	0.285983	0.353375	0.32741	0.348451	0.423066	0.670845	0.460084	0.391734	0.458836	-0.131426
cg27421267	chr10	530836	530837	+	0	0.528797	0.584629	0.599593	0.383331	0.526576	0.524585	0.644018	0.623364	0.745545	0.671735	0.625734	0.662079	-0.137494
cg27422311	chr12	123626132	123626133	+	0.038	0.674029	0.523986	0.757446	0.477023	0.612486	0.608994	0.669209	0.700768	0.812735	0.7492	0.789716	0.744325	-0.135331
cg27424906	chr1	62662166	62662167	+	0.032	0.399246	0.602043	0.693537	0.527418	0.559884	0.556426	0.638674	0.637772	0.736653	0.617368	0.754081	0.676909	-0.120484
cg27429220	chr2	3289427	3289428	-	0.024	0.92504	0.844812	0.785735	0.894651	0.828661	0.85578	0.701451	0.696189	0.623517	0.617768	0.810602	0.689905	0.165874
cg27461196	chr19	35630106	35630107	+	0.024	0.623902	0.477761	0.602699	0.437485	0.477812	0.523932	0.588277	0.619653	0.651643	0.623002	0.658491	0.628213	-0.104281
cg27483342	chr7	156400881	156400882	+	0.009	0.423486	0.318127	0.476976	0.486104	0.405557	0.42205	0.574427	0.530289	0.528209	0.516447	0.479621	0.525799	-0.103748
cg27520536	chr16	54228323	54228324	-	0.014	0.521949	0.500437	0.65219	0.557415	0.525051	0.551408	0.626102	0.630737	0.781436	0.58913	0.800626	0.685606	-0.134198
cg27552679	chr15	74425757	74425758	+	0.007	0.289111	0.264259	0.341242	0.309441	0.278869	0.296584	0.413472	0.354517	0.534968	0.362828	0.340292	0.401216	-0.104631
cg27554551	chr16	4421486	4421487	+	0.046	0.667336	0.454449	0.607489	0.359662	0.49861	0.517509	0.651199	0.594865	0.723659	0.608344	0.590697	0.633753	-0.116244
cg27578869	chr1	17252657	17252658	-	0.044	0.936703	0.741011	0.868041	0.680362	0.772412	0.799706	0.870919	0.880477	0.921754	0.91533	0.937127	0.905121	-0.105415
cg27583138	chr6	24774877	24774878	-	0.035	0.0847533	0.243745	0.20067	0.157647	0.112539	0.159871	0.336767	0.280367	0.300218	0.249322	0.137409	0.260817	-0.100946
cg27585222	chr2	114737730	114737731	-	0.043	0.493908	0.696597	0.774747	0.704644	0.821588	0.698297	0.824319	0.850713	0.758481	0.791103	0.775272	0.799978	-0.101681
cg27640794	chr4	169555699	169555700	-	0.045	0.433171	0.190575	0.525465	0.53246	0.36314	0.408962	0.47149	0.499148	0.550885	0.55134	0.561865	0.526946	-0.117984

## Sheet: Middle DML
ID	Chromosome	Start	End	Strand	pperm_middle[which(pperm_middle <= 0.05)]	X9373550079_R01C01	X9373550079_R03C01	X9373550079_R05C01	X9373550079_R01C02	X9373550079_R03C02	X9426020146_R05C02		X9373550079_R02C01	X9373550079_R04C01	X9373550079_R06C01	X9373550079_R02C02	X9373550079_R04C02	X9373550079_R05C02		Delta Beta
cg00033551	chr16	4738568	4738569	-	0.019	0.645599	0.958959	0.706179	0.927031	0.838482	0.653968	0.78837	0.862328	0.948276	0.848088	0.947892	0.947535	0.9565	0.918437	-0.130067
cg00036408	chr17	79316841	79316842	-	0.019	0.401998	0.571809	0.485619	0.493471	0.520545	0.413297	0.481123	0.552368	0.544825	0.469306	0.701714	0.681793	0.617483	0.594582	-0.113458
cg00059399	chr5	2008272	2008273	-	0.016	0.352798	0.432761	0.362094	0.40185	0.276755	0.322689	0.358158	0.477028	0.413937	0.304204	0.523316	0.659274	0.622239	0.5	-0.141842
cg00068038	chr2	36688564	36688565	+	0.004	0.649231	0.785588	0.668446	0.672453	0.753777	0.669565	0.699843	0.761584	0.816253	0.736224	0.819299	0.868202	0.842456	0.807336	-0.107493
cg00088797	chr3	12976288	12976289	+	0.005	0.363458	0.549678	0.472112	0.467443	0.488488	0.463043	0.46737	0.505319	0.582776	0.546796	0.627294	0.580335	0.561782	0.567384	-0.100013
cg00099766	chr6	90120705	90120706	-	0.009	0.442812	0.587943	0.517692	0.545913	0.506202	0.50869	0.518209	0.544412	0.640485	0.544724	0.744987	0.635993	0.643045	0.625608	-0.107399
cg00107916	chr5	3188066	3188067	+	0.021	0.582239	0.823375	0.577065	0.832395	0.761514	0.612551	0.69819	0.829015	0.905342	0.691807	0.868171	0.887222	0.812541	0.83235	-0.13416
cg00114966	chr1	197893920	197893921	-	0.009	0.741514	0.63472	0.615414	0.408951	0.582255	0.45645	0.573217	0.815087	0.7499	0.680129	0.660446	0.719697	0.713346	0.723101	-0.149884
cg00120948	chr1	8484417	8484418	+	0.004	0.415835	0.556437	0.464442	0.474081	0.495398	0.472656	0.479808	0.557002	0.581783	0.488574	0.68551	0.707975	0.629173	0.608336	-0.128528
cg00135841	chr22	18737348	18737349	-	0.024	0.763875	0.700878	0.584163	0.641222	0.559394	0.80446	0.675665	0.938544	0.77525	0.956909	0.831877	0.946889	0.61847	0.844656	-0.168991
cg00147509	chr22	48917166	48917167	+	0	0.576565	0.654762	0.654654	0.63247	0.657608	0.619682	0.632623	0.693099	0.72264	0.680399	0.744102	0.828061	0.77545	0.740625	-0.108002
cg00194126	chr2	157186312	157186313	-	0.031	0.444635	0.694883	0.472228	0.535697	0.480948	0.55	0.529732	0.551521	0.557718	0.577129	0.767034	0.70286	0.774886	0.655191	-0.12546
cg00223767	chr11	75831715	75831716	+	0.001	0.472233	0.545787	0.554999	0.490138	0.557792	0.56718	0.531355	0.617264	0.669761	0.571579	0.659658	0.720309	0.628233	0.644467	-0.113112
cg00246969	chr13	99159656	99159657	+	0.004	0.582433	0.620372	0.60893	0.615575	0.705181	0.56691	0.616567	0.704513	0.763207	0.715437	0.85849	0.803655	0.686406	0.755285	-0.138718
cg00282704	chr10	21786410	21786411	+	0.009	0.460873	0.496236	0.521833	0.385889	0.376356	0.466921	0.451351	0.481147	0.599053	0.559592	0.628523	0.582995	0.502699	0.559001	-0.10765
cg00290607	chr11	67383545	67383546	-	0.04	0.49955	0.4611	0.23842	0.421233	0.459208	0.476019	0.425922	0.493303	0.548554	0.389033	0.615096	0.498095	0.754905	0.549831	-0.12391
cg00291054	chr16	81073839	81073840	-	0.007	0.619038	0.853426	0.631863	0.759704	0.701646	0.680713	0.707732	0.773885	0.85048	0.829136	0.865789	0.852893	0.868805	0.840165	-0.132433
cg00318631	chr1	247803166	247803167	+	0.007	0.72757	0.76773	0.59332	0.652386	0.70023	0.707515	0.691458	0.818182	0.776744	0.701793	0.821681	0.882503	0.848711	0.808269	-0.11681
cg00320094	chr1	68695183	68695184	+	0.007	0.369033	0.676411	0.565286	0.560346	0.616421	0.528068	0.552594	0.650164	0.75559	0.591363	0.741821	0.77949	0.66746	0.697648	-0.145054
cg00340584	chr1	149512963	149512964	+	0.001	0.578914	0.704042	0.614419	0.559833	0.610029	0.605297	0.612089	0.7719	0.700105	0.759821	0.694659	0.716225	0.692276	0.722498	-0.110408
cg00362657	chr21	44876670	44876671	+	0.046	0.47623	0.776982	0.507742	0.549428	0.535387	0.673159	0.586488	0.491993	0.728199	0.689363	0.84349	0.791976	0.765139	0.71836	-0.131872
cg00385441	chr20	43991402	43991403	+	0.003	0.607331	0.650395	0.632109	0.61649	0.526318	0.587737	0.603396	0.619494	0.785524	0.757716	0.703418	0.66933	0.70462	0.706684	-0.103287
cg00406211	chr10	121077022	121077023	+	0.001	0.680746	0.708555	0.670051	0.585562	0.643663	0.710638	0.666536	0.709873	0.750648	0.739936	0.782546	0.802342	0.817125	0.767078	-0.100543
cg00413089	chr7	158750985	158750986	-	0.04	0.405861	0.375978	0.486415	0.353503	0.394688	0.343892	0.39339	0.526415	0.672051	0.304981	0.686615	0.406803	0.758886	0.559292	-0.165902
cg00438740	chr2	233924930	233924931	-	0.014	0.511857	0.834627	0.608021	0.73402	0.796382	0.774096	0.709834	0.782235	0.770559	0.831748	0.869803	0.843832	0.877753	0.829322	-0.119488
cg00455327	chr18	20714217	20714218	-	0.019	0.630289	0.792213	0.685366	0.66157	0.597198	0.669005	0.672607	0.64856	0.812558	0.725724	0.874308	0.801163	0.803652	0.777661	-0.105054
cg00456651	chr1	31380425	31380426	+	0.004	0.291951	0.198018	0.293597	0.442441	0.262478	0.267635	0.292687	0.464333	0.445331	0.369827	0.482333	0.39111	0.404263	0.426199	-0.133513
cg00467854	chrX	25040358	25040359	+	0.011	0.450276	0.798588	0.443352	0.591179	0.663597	0.532266	0.579876	0.72044	0.715865	0.641503	0.869359	0.869458	0.818962	0.772598	-0.192721
cg00482398	chr6	43424018	43424019	+	0.012	0.490833	0.639201	0.597311	0.534484	0.612991	0.484012	0.559805	0.662084	0.689922	0.535235	0.748853	0.806781	0.680446	0.68722	-0.127415
cg00498804	chr11	8827626	8827627	+	0.04	0.589635	0.78486	0.558565	0.565265	0.736998	0.581376	0.636117	0.690435	0.646899	0.660056	0.849618	0.880203	0.859969	0.76453	-0.128414
cg00520378	chr16	88773576	88773577	-	0.003	0.592538	0.669535	0.546039	0.588679	0.537525	0.520109	0.575737	0.675302	0.669928	0.686414	0.591806	0.704815	0.735508	0.677295	-0.101558
cg00522288	chr12	125625016	125625017	-	0	0.704101	0.640236	0.759854	0.688791	0.740319	0.767646	0.716824	0.821815	0.78782	0.885315	0.852084	0.792262	0.784517	0.820635	-0.103811
cg00528902	chr8	9760528	9760529	+	0.007	0.173106	0.405487	0.444051	0.346801	0.343571	0.256099	0.328186	0.441083	0.446318	0.588408	0.468981	0.518912	0.350742	0.469074	-0.140888
cg00538147	chr10	125751609	125751610	+	0.035	0.354227	0.333295	0.214821	0.25796	0.421359	0.16286	0.290754	0.50915	0.346826	0.356779	0.466009	0.355143	0.31298	0.391148	-0.100394
cg00605270	chr1	28261552	28261553	+	0.004	0.0709552	0.212268	0.0652923	0.0622626	0.0904387	0.147418	0.108106	0.180261	0.231124	0.170928	0.216726	0.237003	0.25706	0.215517	-0.107411
cg00621247	chr5	1949277	1949278	-	0.013	0.667927	0.63425	0.764657	0.628881	0.811522	0.627985	0.689204	0.80778	0.812333	0.791486	0.688185	0.836259	0.854891	0.798489	-0.109285
cg00629688	chr11	105479843	105479844	-	0.008	0.471411	0.682459	0.554837	0.424939	0.643317	0.579315	0.55938	0.686529	0.644238	0.648665	0.693317	0.654489	0.666376	0.665603	-0.106223
cg00698916	chr6	13767628	13767629	-	0.014	0.550141	0.732254	0.643586	0.620471	0.601035	0.596334	0.62397	0.614901	0.764377	0.659185	0.743943	0.827015	0.735277	0.724116	-0.100146
cg00732251	chr6	99276866	99276867	+	0.007	0.517182	0.67274	0.60957	0.587701	0.67782	0.542117	0.601188	0.687441	0.703416	0.684085	0.771189	0.770978	0.637709	0.709136	-0.107948
cg00766289	chr12	3311121	3311122	-	0.047	0.318806	0.524655	0.427913	0.459423	0.493253	0.519858	0.457318	0.402955	0.539133	0.43397	0.637126	0.712765	0.737981	0.577322	-0.120004
cg00806481	chr1	2996650	2996651	+	0.001	0.503074	0.572011	0.514149	0.542858	0.614885	0.517723	0.544117	0.617019	0.589038	0.64872	0.701772	0.745472	0.680826	0.663808	-0.119691
cg00815399	chr7	158750607	158750608	+	0.019	0.545939	0.368887	0.59253	0.465828	0.463855	0.396067	0.472184	0.607064	0.593243	0.523959	0.603379	0.488997	0.731072	0.591286	-0.119101
cg00818106	chr10	134221503	134221504	-	0.022	0.543883	0.696123	0.580783	0.52823	0.668683	0.58203	0.599955	0.644725	0.731761	0.58668	0.713381	0.757432	0.778431	0.702068	-0.102113
cg00849267	chr16	968265	968266	+	0.021	0.740968	0.92449	0.679987	0.705629	0.842212	0.830197	0.787247	0.820817	0.89881	0.815629	0.937099	0.960825	0.941585	0.895794	-0.108547
cg00863099	chr2	87755371	87755372	-	0.027	0.505882	0.769074	0.514402	0.550688	0.594884	0.641145	0.596013	0.644416	0.673471	0.604446	0.825271	0.809496	0.77717	0.722378	-0.126366
cg00876332	chrY	21664717	21664718	+	0.023	0.427661	0.410661	0.252624	0.418117	0.447785	0.412071	0.39482	0.529426	0.459268	0.3548	0.501985	0.554975	0.570425	0.495146	-0.100326
cg00945234	chr1	50886411	50886412	+	0.04	0.155367	0.483273	0.161005	0.380108	0.35735	0.322739	0.309974	0.36832	0.437881	0.246516	0.505758	0.558686	0.547059	0.444036	-0.134063
cg00977403	chr16	1585720	1585721	+	0.038	0.531193	0.794876	0.490892	0.634408	0.667394	0.552718	0.611913	0.689659	0.702145	0.564472	0.794999	0.802089	0.781841	0.722534	-0.110621
cg00978584	chr2	202122832	202122833	-	0.041	0.106053	0.378092	0.144313	0.128082	0.309636	0.157795	0.203995	0.263371	0.296936	0.162837	0.400242	0.418691	0.45189	0.332328	-0.128332
cg01022117	chr1	201258280	201258281	+	0.013	0.412904	0.840474	0.399906	0.867676	0.837408	0.592852	0.658537	0.893975	0.881059	0.831625	0.879761	0.82751	0.876728	0.86511	-0.206573
cg01074584	chr8	41168072	41168073	+	0.035	0.530133	0.793964	0.563263	0.407828	0.709649	0.569442	0.595713	0.783855	0.572179	0.594057	0.793748	0.885097	0.885435	0.752395	-0.156682
cg01086526	chr5	3188191	3188192	-	0.023	0.616001	0.825099	0.613078	0.821859	0.796058	0.619802	0.715316	0.870814	0.877416	0.706502	0.856375	0.884155	0.800479	0.832624	-0.117307
cg01092108	chr5	33362853	33362854	+	0.047	0.390086	0.712643	0.450507	0.448987	0.642924	0.452873	0.516337	0.605519	0.564485	0.616454	0.543889	0.725396	0.716586	0.628721	-0.112385
cg01154445	chr2	206548171	206548172	+	0.044	0.432043	0.840387	0.607274	0.661837	0.608891	0.631876	0.630385	0.689936	0.810349	0.578368	0.808721	0.790395	0.856257	0.755671	-0.125286
cg01168231	chr6	168618157	168618158	-	0.005	0.68683	0.807316	0.721594	0.833146	0.763755	0.780281	0.765487	0.770538	0.905215	0.85668	0.878453	0.919165	0.878872	0.868154	-0.102667
cg01196158	chr1	93912688	93912689	-	0.038	0.487842	0.743335	0.634261	0.688389	0.424309	0.545558	0.587282	0.570687	0.759731	0.684108	0.75791	0.682479	0.744278	0.699865	-0.112583
cg01200177	chr2	128616082	128616083	-	0.044	0.797667	0.768591	0.83827	0.769083	0.813255	0.745538	0.788734	0.787838	0.767406	0.681519	0.570611	0.64036	0.668662	0.686066	0.102668
cg01215717	chr17	79131893	79131894	+	0.004	0.638443	0.759612	0.657748	0.730781	0.729271	0.646337	0.693699	0.720086	0.877854	0.813411	0.835089	0.845928	0.903588	0.832659	-0.138961
cg01270206	chr20	55199493	55199494	-	0.036	0.578776	0.852019	0.672108	0.702408	0.631383	0.660434	0.682855	0.746951	0.697359	0.711241	0.864033	0.838503	0.848372	0.78441	-0.101555
cg01271812	chr2	66671478	66671479	-	0.001	0.613735	0.738718	0.696239	0.65206	0.752132	0.680676	0.688927	0.755281	0.830355	0.75336	0.829485	0.863208	0.800196	0.805314	-0.116388
cg01281040	chr5	6349545	6349546	-	0.016	0.63284	0.896868	0.63957	0.820076	0.852209	0.678658	0.75337	0.825761	0.926605	0.76583	0.971115	0.938063	0.95922	0.897766	-0.144396
cg01288904	chr8	80947440	80947441	-	0.037	0.286337	0.640054	0.360888	0.470445	0.527814	0.420222	0.45096	0.556473	0.571954	0.38219	0.686389	0.662011	0.66574	0.58746	-0.136499
cg01307174	chr3	35722556	35722557	-	0.043	0.589222	0.83632	0.647837	0.716435	0.514755	0.676265	0.663473	0.56499	0.865931	0.7556	0.911844	0.792021	0.884699	0.795847	-0.132375
cg01308913	chrX	25040907	25040908	-	0.006	0.491087	0.623765	0.453729	0.538042	0.6489	0.431428	0.531159	0.703736	0.635892	0.558028	0.662501	0.813643	0.758943	0.68879	-0.157632
cg01338139	chr15	38987640	38987641	+	0.039	0.683142	0.561579	0.484086	0.53806	0.651855	0.639078	0.592967	0.658274	0.785353	0.749053	0.527121	0.735002	0.731356	0.697693	-0.104726
cg01346152	chr1	12678761	12678762	+	0.009	0.561366	0.708071	0.634516	0.585474	0.63851	0.569484	0.616237	0.657198	0.73614	0.656474	0.775009	0.759133	0.779882	0.727306	-0.111069
cg01353448	chr7	31726912	31726913	+	0.008	0.516806	0.626238	0.494731	0.576946	0.581755	0.527689	0.554028	0.568393	0.71187	0.59366	0.686194	0.703474	0.68712	0.658452	-0.104424
cg01383799	chr16	29819361	29819362	-	0.009	0.348536	0.515204	0.359666	0.295928	0.340399	0.381594	0.373554	0.434154	0.534514	0.395802	0.637949	0.490149	0.556906	0.508246	-0.134691
cg01396065	chr3	193789440	193789441	+	0.005	0.204738	0.368995	0.17137	0.269151	0.254357	0.252743	0.253559	0.292213	0.350186	0.278388	0.413419	0.522333	0.583688	0.406704	-0.153146
cg01398859	chrX	25040609	25040610	+	0.007	0.28254	0.528035	0.209497	0.255664	0.392232	0.180727	0.308116	0.552214	0.432299	0.393931	0.481023	0.69515	0.718885	0.545584	-0.237468
cg01411921	chr7	25893858	25893859	+	0.026	0.583615	0.581219	0.623644	0.397624	0.674217	0.535711	0.566005	0.675666	0.570834	0.668769	0.59315	0.812963	0.803012	0.687399	-0.121394
cg01419914	chr17	79374691	79374692	-	0.023	0.571115	0.787784	0.684861	0.695687	0.71672	0.60481	0.676829	0.70939	0.728827	0.726112	0.86558	0.846776	0.848077	0.78746	-0.110631
cg01422262	chr1	108506291	108506292	-	0.048	0.431448	0.740681	0.461298	0.444938	0.649357	0.605773	0.555583	0.666874	0.638442	0.554739	0.712044	0.667679	0.726668	0.661074	-0.105492
cg01422797	chr6	100053305	100053306	-	0.035	0.700658	0.808019	0.78314	0.800783	0.814711	0.850027	0.79289	0.665025	0.661806	0.5916	0.73481	0.491046	0.761279	0.650928	0.141962
cg01459854	chr14	62583388	62583389	+	0.009	0.665038	0.787739	0.671278	0.633601	0.680171	0.644494	0.680387	0.732412	0.798308	0.718423	0.854843	0.795737	0.814684	0.785735	-0.105348
cg01473602	chr12	77257301	77257302	+	0.005	0.59524	0.59724	0.607532	0.575485	0.575745	0.646168	0.599568	0.433771	0.376333	0.548201	0.513063	0.494851	0.466062	0.472047	0.127521
cg01513392	chr20	21488198	21488199	+	0.004	0.519156	0.651693	0.579842	0.56903	0.582872	0.536766	0.573226	0.66349	0.692556	0.598559	0.757704	0.755067	0.605696	0.678845	-0.105619
cg01556846	chr8	6421171	6421172	+	0.015	0.64968	0.744645	0.607548	0.587989	0.687866	0.75118	0.671485	0.787627	0.763798	0.654411	0.757831	0.795437	0.872812	0.771986	-0.100501
cg01580044	chr1	114300656	114300657	-	0.004	0.274459	0.384857	0.306366	0.290118	0.363815	0.338448	0.326344	0.384289	0.480984	0.355751	0.478433	0.40105	0.477111	0.429603	-0.103259
cg01636599	chr19	639386	639387	+	0.001	0.183399	0.205249	0.13529	0.0898993	0.095718	0.162294	0.145308	0.349637	0.217626	0.308685	0.295293	0.207877	0.210746	0.264977	-0.119669
cg01657744	chr10	88471748	88471749	-	0.003	0.463971	0.68391	0.547367	0.571474	0.584504	0.520725	0.561992	0.651799	0.676685	0.625635	0.794957	0.762441	0.667848	0.696561	-0.134569
cg01687189	chr12	102225365	102225366	-	0.007	0.55789	0.686516	0.594536	0.579494	0.699767	0.652453	0.628443	0.661248	0.721565	0.704799	0.726049	0.817838	0.777259	0.734793	-0.10635
cg01692639	chr6	99273568	99273569	-	0.01	0.421394	0.564935	0.484507	0.479552	0.519256	0.445606	0.485875	0.532251	0.602238	0.477711	0.649086	0.654347	0.612279	0.587985	-0.10211
cg01746044	chr22	30234775	30234776	+	0.011	0.430536	0.687018	0.470051	0.527901	0.509727	0.52603	0.52521	0.576853	0.630347	0.552935	0.666704	0.793552	0.721654	0.657008	-0.131797
cg01780171	chr2	236100688	236100689	-	0.016	0.583877	0.768105	0.659429	0.585534	0.808339	0.608199	0.668914	0.863514	0.824822	0.69071	0.753762	0.932689	0.818112	0.813935	-0.145021
cg01790771	chr12	45611089	45611090	-	0.004	0.254989	0.414374	0.381302	0.327724	0.459508	0.323992	0.360315	0.472269	0.437076	0.398832	0.521034	0.534482	0.513454	0.479524	-0.11921
cg01806261	chr7	110722380	110722381	+	0.004	0.513785	0.665818	0.496475	0.58058	0.642987	0.594223	0.582311	0.637772	0.684559	0.649524	0.712286	0.742478	0.729509	0.692688	-0.110377
cg01807688	chrX	133680740	133680741	-	0.001	0.637014	0.630317	0.644102	0.66332	0.617572	0.580206	0.628755	0.670422	0.75598	0.733583	0.778187	0.78314	0.727783	0.741516	-0.112761
cg01808739	chr1	93912802	93912803	+	0.007	0.447519	0.627542	0.517608	0.586177	0.472033	0.516269	0.527858	0.569072	0.682997	0.585761	0.675221	0.653583	0.681197	0.641305	-0.113447
cg01860805	chr5	180659749	180659750	-	0.006	0.579954	0.652236	0.645925	0.605665	0.636512	0.540107	0.610067	0.620196	0.782273	0.721113	0.626389	0.706864	0.812241	0.711513	-0.101446
cg01884057	chr2	25150051	25150052	+	0.009	0.365595	0.290561	0.373529	0.198773	0.372571	0.246117	0.307858	0.464553	0.392318	0.357677	0.343696	0.446551	0.463057	0.411308	-0.103451
cg01914037	chr4	129207725	129207726	-	0.002	0.130872	0.157971	0.184878	0.148701	0.24931	0.148194	0.169988	0.242781	0.287986	0.202138	0.294516	0.306881	0.297647	0.271991	-0.102004
cg01944288	chr9	135036217	135036218	+	0.005	0.453436	0.580125	0.539859	0.547608	0.610388	0.412785	0.524033	0.624625	0.624828	0.574877	0.71992	0.667977	0.596231	0.634743	-0.11071
cg01949002	chr1	2203589	2203590	-	0.005	0.445442	0.570644	0.482763	0.473517	0.553742	0.478005	0.500685	0.562614	0.576067	0.501661	0.725403	0.64924	0.617426	0.605402	-0.104716
cg01951420	chr3	121553821	121553822	+	0.042	0.205105	0.0374737	0.0355059	0.0370901	0.0200794	0.0244838	0.0599564	0.204189	0.189447	0.282598	0.0328576	0.224636	0.0323624	0.161015	-0.101059
cg01972979	chrX	133680446	133680447	+	0.003	0.69412	0.659185	0.671541	0.764961	0.65714	0.710912	0.692976	0.709281	0.76677	0.856755	0.894631	0.829179	0.767489	0.804017	-0.111041
cg01975591	chrX	9432530	9432531	-	0.047	0.396252	0.627651	0.527131	0.500613	0.427754	0.376646	0.476008	0.449501	0.603244	0.473169	0.657622	0.608707	0.705455	0.58295	-0.106941
cg02013146	chr16	89452259	89452260	+	0.01	0.631878	0.817792	0.758742	0.777235	0.928913	0.70667	0.770205	0.917801	0.853986	0.851552	0.894665	0.965707	0.962387	0.907683	-0.137478
cg02019444	chr21	35016787	35016788	+	0.018	0.612973	0.840578	0.696303	0.700526	0.784212	0.695604	0.721699	0.825378	0.871857	0.670747	0.906819	0.908296	0.906917	0.848335	-0.126636
cg02076598	chr22	25423801	25423802	-	0.003	0.731981	0.834251	0.795394	0.727288	0.819101	0.669287	0.762884	0.854561	0.899916	0.804735	0.935684	0.937744	0.926777	0.893236	-0.130353
cg02086310	chr20	25039719	25039720	-	0.03	0.391552	0.535156	0.530421	0.328275	0.428788	0.652877	0.477845	0.573319	0.636893	0.508726	0.550942	0.613574	0.695901	0.596559	-0.118714
cg02126031	chr14	54686316	54686317	+	0.05	0.460764	0.752372	0.535426	0.559434	0.568436	0.55218	0.571435	0.626699	0.558849	0.579166	0.719668	0.774111	0.79744	0.675989	-0.104554
cg02150354	chr5	92914202	92914203	+	0.03	0.395255	0.604468	0.458144	0.538451	0.590659	0.482199	0.511529	0.600744	0.620346	0.451361	0.729059	0.662091	0.666931	0.621756	-0.110226
cg02171859	chr7	853441	853442	-	0.004	0.604655	0.651285	0.665689	0.630239	0.722009	0.571522	0.6409	0.719067	0.736292	0.692327	0.81431	0.804679	0.694317	0.743499	-0.102599
cg02176678	chr2	219576539	219576540	-	0.041	0.323849	0.264984	0.338857	0.340738	0.4015	0.255164	0.320849	0.196736	0.184996	0.264051	0.167306	0.174222	0.164093	0.191901	0.128948
cg02179982	chr22	46365647	46365648	+	0.029	0.542223	0.814425	0.603261	0.706489	0.731127	0.640383	0.672985	0.724876	0.7393	0.693233	0.850278	0.825803	0.825014	0.776417	-0.103433
cg02180979	chr10	73575440	73575441	+	0.011	0.651584	0.880002	0.696545	0.829842	0.815836	0.626653	0.750077	0.827901	0.908531	0.81537	0.895278	0.840787	0.885451	0.86222	-0.112142
cg02202246	chr10	134225218	134225219	-	0.015	0.506697	0.622958	0.372486	0.463309	0.418831	0.557575	0.49031	0.515377	0.604927	0.544672	0.69519	0.686696	0.693873	0.623456	-0.133146
cg02207200	chr8	17353980	17353981	-	0.005	0.684509	0.658411	0.633733	0.588574	0.589678	0.551852	0.617793	0.692662	0.727631	0.793908	0.733725	0.731886	0.643804	0.720603	-0.10281
cg02215357	chr13	53191046	53191047	-	0.046	0.258426	0.616738	0.328247	0.395909	0.37253	0.387035	0.393148	0.422863	0.507671	0.352728	0.509584	0.669346	0.649638	0.518638	-0.125491
cg02219116	chr9	140173956	140173957	-	0.008	0.717205	0.913105	0.777658	0.698414	0.889755	0.752939	0.791513	0.899455	0.860966	0.964369	0.94104	0.928424	0.955684	0.92499	-0.133477
cg02231229	chrX	80256766	80256767	-	0.026	0.545433	0.585407	0.570015	0.451402	0.707341	0.49812	0.55962	0.737439	0.532468	0.663377	0.675893	0.713594	0.716475	0.673208	-0.113588
cg02235041	chr8	144676053	144676054	+	0.037	0.528905	0.912735	0.610382	0.772898	0.7765	0.611284	0.702117	0.796336	0.785061	0.70369	0.930135	0.888707	0.950145	0.842346	-0.140228
cg02297879	chr10	134144761	134144762	+	0.023	0.260352	0.127008	0.144028	0.108078	0.179191	0.110257	0.154819	0.180894	0.252619	0.364242	0.340958	0.343029	0.127874	0.268269	-0.11345
cg02335251	chr2	66801399	66801400	-	0.008	0.240291	0.693466	0.344905	0.507713	0.540537	0.473937	0.466808	0.648419	0.637974	0.528751	0.691835	0.746914	0.830494	0.680731	-0.213923
cg02343604	chr1	23884703	23884704	+	0.006	0.691209	0.689323	0.720872	0.628115	0.77947	0.596133	0.684187	0.784506	0.797982	0.791996	0.801837	0.822861	0.749995	0.791529	-0.107342
cg02351381	chr12	110172346	110172347	+	0.028	0.589974	0.653606	0.645693	0.368427	0.674783	0.473856	0.567723	0.663423	0.781607	0.686726	0.699683	0.585405	0.682997	0.683307	-0.115584
cg02374984	chr16	55866842	55866843	+	0.025	0.825933	0.766717	0.767015	0.552324	0.718221	0.641248	0.71191	0.727061	0.883022	0.770466	0.83487	0.849451	0.87223	0.82285	-0.11094
cg02380802	chr16	53407808	53407809	+	0.011	0.627919	0.727369	0.547222	0.465753	0.749625	0.656666	0.629092	0.732317	0.771667	0.715518	0.702698	0.803987	0.756993	0.747197	-0.118104
cg02386604	chr8	110656245	110656246	-	0.009	0.606745	0.798431	0.685252	0.676547	0.692623	0.638111	0.682951	0.717595	0.795151	0.724605	0.848447	0.866232	0.834825	0.797809	-0.114858
cg02387803	chr3	147123457	147123458	+	0.018	0.462456	0.704971	0.447216	0.550438	0.622027	0.515886	0.550499	0.624064	0.637184	0.565495	0.748051	0.695423	0.747517	0.669622	-0.119123
cg02390329	chr3	147113092	147113093	+	0.014	0.713783	0.872479	0.74708	0.66199	0.833692	0.769964	0.766498	0.867453	0.808074	0.869433	0.884086	0.892999	0.89437	0.869403	-0.102905
cg02407266	chr10	79637979	79637980	+	0.001	0.46706	0.49883	0.56448	0.442233	0.547549	0.498053	0.503034	0.652302	0.638388	0.567995	0.625645	0.634853	0.675033	0.632369	-0.129335
cg02412810	chr12	217788	217789	-	0.039	0.578354	0.470443	0.507187	0.517785	0.482177	0.53751	0.515576	0.433737	0.430174	0.46708	0.322832	0.336307	0.477688	0.411303	0.104273
cg02424103	chr3	156892029	156892030	-	0.012	0.417842	0.629972	0.487635	0.552327	0.503496	0.474571	0.510974	0.572278	0.539662	0.595271	0.649473	0.679441	0.673072	0.6182	-0.107226
cg02483661	chr1	2460621	2460622	+	0.019	0.350824	0.636709	0.334885	0.521582	0.56852	0.467584	0.480017	0.550323	0.62446	0.553325	0.730349	0.673226	0.58052	0.6187	-0.138683
cg02493602	chr11	86383696	86383697	+	0.037	0.255355	0.449657	0.29549	0.351137	0.19223	0.313784	0.309609	0.361056	0.371891	0.355209	0.457668	0.332699	0.609396	0.414653	-0.105044
cg02518135	chr1	247802739	247802740	-	0.016	0.431702	0.556172	0.331188	0.44412	0.534666	0.483826	0.463612	0.589959	0.59638	0.429546	0.579516	0.678133	0.633663	0.584533	-0.120921
cg02520639	chr8	82021210	82021211	-	0.034	0.438117	0.692798	0.44955	0.644723	0.532334	0.611625	0.561524	0.516954	0.730288	0.682447	0.745523	0.68135	0.686455	0.673836	-0.112312
cg02551743	chr2	66673428	66673429	-	0.011	0.551467	0.509375	0.574698	0.555466	0.704157	0.556268	0.575238	0.631918	0.678134	0.645678	0.654357	0.752211	0.775964	0.68971	-0.114472
cg02555243	chr12	24097128	24097129	-	0.04	0.637088	0.756233	0.627714	0.640211	0.694624	0.589849	0.65762	0.672523	0.638413	0.700342	0.777279	0.900527	0.860825	0.758318	-0.100698
cg02711929	chr10	124220396	124220397	+	0.005	0.657249	0.710621	0.737486	0.690616	0.644086	0.66519	0.684208	0.703929	0.748867	0.771947	0.870552	0.825579	0.8262	0.791179	-0.106971
cg02744699	chr17	80197898	80197899	-	0.041	0.638395	0.981806	0.808451	0.793733	0.935272	0.767418	0.820846	0.934878	0.98077	0.935277	0.981698	0.972396	0.813512	0.936422	-0.115576
cg02821342	chr7	130793551	130793552	+	0.013	0.215177	0.411705	0.278705	0.335774	0.259962	0.240804	0.290354	0.3052	0.498259	0.325289	0.437671	0.405491	0.419485	0.398566	-0.108212
cg02882159	chr17	79183390	79183391	+	0.037	0.691301	0.642807	0.699281	0.595006	0.725328	0.686505	0.673371	0.62509	0.518623	0.57727	0.429677	0.455592	0.62734	0.538932	0.134439
cg02882487	chr8	28560658	28560659	+	0.003	0.359633	0.450434	0.40976	0.424416	0.437263	0.382757	0.41071	0.474826	0.522389	0.435181	0.589947	0.58896	0.514734	0.521006	-0.110295
cg02889672	chr19	56028812	56028813	+	0.027	0.236307	0.535616	0.232163	0.30665	0.251418	0.25673	0.303147	0.36948	0.406379	0.287225	0.485469	0.507614	0.530318	0.431081	-0.127934
cg02902865	chr1	12679132	12679133	+	0.008	0.598085	0.721404	0.650439	0.531571	0.638078	0.583082	0.620443	0.652209	0.76511	0.697046	0.756937	0.753566	0.797255	0.737021	-0.116578
cg02905198	chr12	54070610	54070611	-	0.044	0.322088	0.512808	0.282032	0.320336	0.433086	0.352561	0.370485	0.397242	0.451908	0.324349	0.561558	0.546884	0.593036	0.479163	-0.108678
cg02906407	chr7	149485740	149485741	-	0.043	0.549751	0.822142	0.573203	0.650228	0.673748	0.660251	0.654887	0.699954	0.653687	0.692659	0.851478	0.833219	0.867524	0.76642	-0.111533
cg02909446	chr10	73849124	73849125	+	0.043	0.513058	0.753664	0.51319	0.501189	0.703369	0.568509	0.592163	0.732429	0.581136	0.565524	0.793572	0.760706	0.834034	0.711233	-0.11907
cg02936035	chr6	47631791	47631792	-	0.01	0.61947	0.655606	0.554647	0.602257	0.759688	0.433056	0.604121	0.779572	0.749256	0.700702	0.630264	0.773916	0.821147	0.742476	-0.138355
cg02937671	chr4	2366485	2366486	-	0.022	0.752766	0.749923	0.62375	0.67619	0.648203	0.451373	0.650368	0.805665	0.74725	0.740901	0.820043	0.704903	0.695046	0.752301	-0.101934
cg02956806	chr9	140174741	140174742	-	0.017	0.629374	0.774624	0.650346	0.61295	0.770503	0.60735	0.674191	0.758034	0.716575	0.777242	0.792886	0.800716	0.825696	0.778525	-0.104334
cg02964065	chr6	32729545	32729546	+	0.02	0.596629	0.599546	0.582201	0.500193	0.701532	0.718094	0.616366	0.846336	0.663808	0.652697	0.781873	0.682307	0.839551	0.744429	-0.128063
cg02974976	chr1	117077219	117077220	-	0.001	0.655717	0.587919	0.651845	0.551832	0.658683	0.531282	0.606213	0.771398	0.714212	0.694859	0.675006	0.731956	0.802822	0.731709	-0.125496
cg03021329	chr3	124554058	124554059	+	0.037	0.513773	0.4547	0.370565	0.142048	0.458449	0.542853	0.413731	0.419076	0.638206	0.410584	0.594594	0.60736	0.599699	0.54492	-0.131188
cg03036210	chr16	89904091	89904092	-	0.011	0.609043	0.737897	0.507896	0.520391	0.507903	0.587373	0.578417	0.63506	0.680965	0.63776	0.731854	0.721369	0.725748	0.688793	-0.110375
cg03120185	chr6	100054118	100054119	+	0.019	0.165186	0.274704	0.210999	0.179546	0.277693	0.190237	0.216394	0.327559	0.339314	0.138147	0.411552	0.531719	0.410401	0.359782	-0.143388
cg03156170	chr17	55673870	55673871	+	0.004	0.559719	0.730083	0.592583	0.678376	0.711998	0.568987	0.640291	0.76494	0.699863	0.70836	0.825243	0.816481	0.780449	0.765889	-0.125598
cg03192231	chr3	35786480	35786481	+	0.004	0.548593	0.783062	0.624741	0.684389	0.603383	0.647655	0.648637	0.738838	0.810806	0.747187	0.857922	0.789524	0.826891	0.795195	-0.146558
cg03231163	chr19	39360465	39360466	+	0.027	0.271642	0.550574	0.271777	0.393689	0.460118	0.366038	0.385639	0.547993	0.546816	0.298792	0.631891	0.61582	0.511768	0.525513	-0.139874
cg03249590	chr12	57040199	57040200	+	0.027	0.194409	0.332697	0.233773	0.294149	0.25702	0.254463	0.261085	0.581037	0.289329	0.182572	0.377943	0.628746	0.382144	0.406962	-0.145877
cg03252296	chrX	31283706	31283707	-	0.002	0.542428	0.642653	0.552874	0.684394	0.610265	0.580372	0.602164	0.612922	0.747319	0.720096	0.74682	0.726719	0.726497	0.713396	-0.111231
cg03260530	chr17	81049494	81049495	+	0.004	0.767311	0.908488	0.821074	0.770332	0.865134	0.712424	0.807461	0.878879	0.926192	0.853086	0.940982	0.956502	0.928745	0.914065	-0.106604
cg03297163	chr7	2548137	2548138	+	0.014	0.590044	0.82168	0.656339	0.651477	0.636472	0.641955	0.666328	0.737184	0.779385	0.669892	0.810936	0.847905	0.8067	0.775334	-0.109006
cg03304437	chr4	159092536	159092537	-	0.039	0.501873	0.835402	0.585239	0.712588	0.763915	0.580147	0.663194	0.707755	0.804421	0.623162	0.891921	0.865167	0.832998	0.787571	-0.124377
cg03308092	chr22	17488275	17488276	-	0.007	0.268523	0.275554	0.223476	0.230875	0.274947	0.335083	0.268076	0.367474	0.449029	0.258894	0.493926	0.419545	0.385577	0.395741	-0.127665
cg03314963	chr7	137028972	137028973	+	0.036	0.466171	0.378439	0.500746	0.460388	0.476478	0.456687	0.456485	0.398912	0.368186	0.383326	0.255225	0.321184	0.400287	0.35452	0.101965
cg03318593	chr2	3105053	3105054	+	0.033	0.877643	0.860867	0.549775	0.857246	0.513614	0.852283	0.751905	0.867822	0.868127	0.891787	0.857844	0.888505	0.856004	0.871681	-0.119777
cg03332546	chr19	16553887	16553888	+	0.015	0.592446	0.686423	0.654397	0.645661	0.74325	0.567084	0.64821	0.742604	0.769487	0.681131	0.805891	0.811797	0.693656	0.750761	-0.102551
cg03384440	chr3	523375	523376	+	0.045	0.425339	0.739598	0.474045	0.636619	0.552906	0.545505	0.562335	0.624564	0.660732	0.496387	0.731209	0.75931	0.770571	0.673795	-0.11146
cg03392386	chr11	133800800	133800801	+	0.006	0.461533	0.592429	0.604839	0.565379	0.361176	0.551256	0.522769	0.591088	0.558358	0.811868	0.791392	0.768495	0.616065	0.689544	-0.166776
cg03433986	chr11	62477624	62477625	+	0.011	0.480942	0.628134	0.406294	0.57023	0.588969	0.503438	0.529668	0.565793	0.699059	0.606794	0.622534	0.645831	0.647334	0.631224	-0.101556
cg03452625	chr3	11537620	11537621	+	0.017	0.534125	0.632578	0.540922	0.592094	0.68719	0.478956	0.577644	0.654456	0.74241	0.545327	0.799632	0.801835	0.708248	0.708651	-0.131007
cg03477332	chr5	16178784	16178785	-	0.002	0.360251	0.515021	0.368558	0.529652	0.472783	0.488298	0.455761	0.552754	0.5627	0.682691	0.500531	0.623862	0.565361	0.581316	-0.125556
cg03484438	chr16	89452237	89452238	+	0.004	0.620048	0.752596	0.718446	0.713801	0.883001	0.606196	0.715681	0.864846	0.800566	0.841847	0.838438	0.944976	0.944321	0.872499	-0.156818
cg03508095	chr4	165878742	165878743	-	0.019	0.343355	0.404519	0.294508	0.30282	0.306958	0.30822	0.32673	0.645261	0.310236	0.423619	0.384016	0.616166	0.350978	0.455046	-0.128316
cg03511957	chr1	167765211	167765212	+	0.013	0.569833	0.70552	0.5889	0.567558	0.681854	0.632955	0.624437	0.643596	0.723418	0.664575	0.783312	0.795533	0.747289	0.726287	-0.10185
cg03520624	chr11	70516558	70516559	-	0.021	0.642535	0.734632	0.669404	0.670591	0.836577	0.6614	0.702523	0.804196	0.787887	0.690828	0.821293	0.884158	0.889506	0.812978	-0.110455
cg03532030	chr2	242824433	242824434	-	0.021	0.41124	0.650292	0.506904	0.593687	0.72723	0.43362	0.553829	0.692074	0.664278	0.524582	0.856089	0.923483	0.845353	0.750976	-0.197147
cg03534662	chr3	45636225	45636226	-	0	0.570518	0.681191	0.624396	0.615879	0.677636	0.566619	0.622706	0.705381	0.734969	0.755203	0.785054	0.756973	0.686307	0.737314	-0.114608
cg03540589	chr3	39192364	39192365	-	0.001	0.656338	0.650292	0.697413	0.555063	0.709676	0.631325	0.650018	0.755764	0.750207	0.705814	0.789336	0.780146	0.721877	0.750524	-0.100506
cg03599357	chr18	76737392	76737393	-	0.011	0.274569	0.541309	0.332303	0.355229	0.464018	0.411008	0.396406	0.5045	0.479189	0.401996	0.566115	0.669788	0.647276	0.544811	-0.148405
cg03612357	chr1	227162127	227162128	-	0.016	0.778403	0.910444	0.736807	0.651266	0.891987	0.828278	0.799531	0.848534	0.923145	0.903884	0.921763	0.899832	0.940142	0.906217	-0.106686
cg03623097	chr10	124213466	124213467	-	0.002	0.553583	0.752027	0.700062	0.636048	0.653463	0.65573	0.658485	0.785808	0.710334	0.807968	0.754105	0.777746	0.748978	0.764156	-0.105671
cg03635532	chr19	40376883	40376884	-	0.04	0.938738	0.384887	0.921699	0.87519	0.750812	0.396077	0.711234	0.848516	0.92557	0.936341	0.922717	0.921789	0.898236	0.908862	-0.197628
cg03646096	chr8	852352	852353	-	0.025	0.689756	0.69553	0.638759	0.687157	0.882836	0.71831	0.718725	0.828292	0.711889	0.784944	0.803904	0.950288	0.954028	0.838891	-0.120166
cg03664011	chr2	213805207	213805208	+	0.022	0.489765	0.467403	0.605756	0.48688	0.641585	0.61883	0.551703	0.66066	0.676237	0.675737	0.677637	0.708571	0.560635	0.659913	-0.10821
cg03689092	chr2	128439345	128439346	+	0.001	0.594016	0.64324	0.668954	0.637405	0.628535	0.551498	0.620608	0.74354	0.769001	0.71322	0.790446	0.757677	0.698566	0.745408	-0.1248
cg03699426	chr13	114001816	114001817	-	0.001	0.704138	0.651671	0.678419	0.517381	0.646794	0.671692	0.645016	0.791836	0.753824	0.727208	0.749013	0.74586	0.707594	0.745889	-0.100873
cg03792653	chr20	36661448	36661449	-	0.023	0.329923	0.284884	0.325954	0.315442	0.386872	0.238954	0.313672	0.297977	0.452454	0.305627	0.48267	0.53235	0.415177	0.414376	-0.100705
cg03805182	chr16	73078071	73078072	-	0.043	0.391525	0.610577	0.431442	0.507507	0.646038	0.439571	0.504443	0.634971	0.559744	0.485295	0.700013	0.682731	0.580047	0.607133	-0.10269
cg03830585	chr3	4536777	4536778	-	0.006	0.478888	0.657042	0.517607	0.518999	0.550542	0.583894	0.551162	0.593488	0.699269	0.612955	0.674981	0.656655	0.725601	0.660492	-0.10933
cg03839794	chr14	34269541	34269542	+	0.003	0.630039	0.731946	0.612129	0.615543	0.720891	0.631276	0.656971	0.720663	0.765362	0.746837	0.829404	0.76041	0.776963	0.766607	-0.109636
cg03847896	chr1	112154295	112154296	+	0.016	0.368552	0.49595	0.423076	0.246106	0.771755	0.658186	0.493937	0.637256	0.748366	0.736991	0.708768	0.708461	0.6728	0.702107	-0.20817
cg03955483	chr19	44324481	44324482	+	0	0.42835	0.475201	0.387789	0.435166	0.402808	0.40516	0.422412	0.607653	0.499075	0.576023	0.51703	0.59981	0.513994	0.552264	-0.129852
cg03989480	chr1	50885352	50885353	+	0.035	0.354162	0.690099	0.427314	0.559926	0.573501	0.498845	0.517308	0.626247	0.681389	0.431967	0.703634	0.76306	0.651444	0.642957	-0.125649
cg03998338	chr16	55794910	55794911	-	0.044	0.773878	0.814058	0.759785	0.285344	0.468195	0.281572	0.563805	0.537793	0.797871	0.733737	0.855831	0.927464	0.87251	0.787534	-0.223729
cg03999941	chr5	957511	957512	-	0.037	0.647854	0.69035	0.570453	0.451573	0.712147	0.552751	0.604188	0.755027	0.676693	0.529299	0.757021	0.880461	0.856444	0.742491	-0.138303
cg04004830	chr2	192711243	192711244	-	0.005	0.639261	0.758077	0.637592	0.634892	0.650665	0.62815	0.658106	0.709944	0.767841	0.720587	0.852483	0.839919	0.8229	0.785612	-0.127506
cg04072301	chr16	88975960	88975961	-	0.017	0.694913	0.75123	0.634316	0.504903	0.684866	0.366747	0.606162	0.620792	0.712089	0.788118	0.835781	0.83042	0.819648	0.767808	-0.161646
cg04093349	chr15	66998947	66998948	-	0.001	0.807878	0.70539	0.786639	0.693959	0.813101	0.735748	0.757119	0.823848	0.858468	0.885876	0.892305	0.884934	0.914165	0.876599	-0.11948
cg04124740	chr17	64400691	64400692	-	0.002	0.212936	0.381374	0.387129	0.362331	0.459437	0.335732	0.35649	0.450141	0.530325	0.411838	0.600113	0.557395	0.470181	0.503332	-0.146842
cg04133658	chr3	129161504	129161505	-	0.039	0.50339	0.711563	0.499708	0.495411	0.567505	0.512404	0.54833	0.550026	0.63379	0.568937	0.688974	0.723704	0.727409	0.648807	-0.100476
cg04138492	chr15	74420890	74420891	+	0.033	0.57945	0.704654	0.60363	0.594942	0.570475	0.620839	0.612332	0.601138	0.582577	0.707219	0.806474	0.799887	0.792013	0.714885	-0.102553
cg04146259	chr14	85058259	85058260	+	0.012	0.723388	0.881083	0.71888	0.769366	0.832053	0.682284	0.767842	0.865001	0.920433	0.770171	0.903906	0.946121	0.918313	0.887324	-0.119482
cg04152196	chr6	136172687	136172688	+	0.046	0.223942	0.425573	0.305379	0.296203	0.300001	0.373039	0.320689	0.283811	0.387184	0.301946	0.489225	0.51877	0.575746	0.426114	-0.105424
cg04177945	chr14	35838240	35838241	-	0.024	0.58083	0.709179	0.616824	0.524144	0.654011	0.557306	0.607049	0.669013	0.666812	0.581999	0.744276	0.834387	0.825888	0.720396	-0.113347
cg04209913	chr5	37836246	37836247	-	0.001	0.351129	0.498755	0.399492	0.504765	0.449367	0.475343	0.446475	0.566605	0.556122	0.525436	0.716939	0.519128	0.483547	0.561296	-0.114821
cg04229928	chr11	119303807	119303808	-	0.023	0.279315	0.479849	0.290199	0.367899	0.325798	0.304909	0.341328	0.413726	0.4198	0.28906	0.502446	0.569499	0.550235	0.457461	-0.116133
cg04256864	chr10	119292300	119292301	+	0.046	0.0592735	0.183382	0.0777193	0.0729845	0.242116	0.146289	0.130294	0.245749	0.102819	0.116696	0.188179	0.378793	0.399	0.238539	-0.108245
cg04267765	chr1	95390267	95390268	-	0.012	0.679118	0.704986	0.696684	0.668929	0.803399	0.605515	0.693105	0.779251	0.827897	0.751214	0.848311	0.845249	0.738134	0.798343	-0.105238
cg04293307	chr17	63553581	63553582	+	0.003	0.642678	0.844395	0.701531	0.744463	0.816502	0.666551	0.73602	0.846047	0.835465	0.814402	0.899991	0.903426	0.851854	0.858531	-0.122511
cg04297105	chr2	103235258	103235259	-	0.004	0.400887	0.366837	0.272536	0.249652	0.368126	0.387533	0.340928	0.501445	0.3537	0.423195	0.472997	0.479126	0.464835	0.449216	-0.108288
cg04373760	chr16	53404718	53404719	-	0.024	0.615245	0.574411	0.733069	0.716241	0.585395	0.565585	0.631658	0.898545	0.642552	0.926026	0.588944	0.888782	0.717089	0.77699	-0.145332
cg04381873	chr19	37760594	37760595	-	0.048	0.91216	0.948103	0.959782	0.480437	0.531229	0.932174	0.793981	0.945417	0.946105	0.901282	0.962684	0.969478	0.972468	0.949572	-0.155591
cg04392266	chr10	45720134	45720135	-	0.015	0.880111	0.729131	0.437546	0.696209	0.776775	0.844118	0.727315	0.843511	0.916668	0.803803	0.87989	0.909572	0.859928	0.868895	-0.14158
cg04403415	chr12	124991087	124991088	+	0.004	0.447082	0.655163	0.510534	0.47235	0.592916	0.495249	0.528882	0.636141	0.673306	0.609019	0.744648	0.758169	0.723759	0.690841	-0.161958
cg04436207	chr3	147136463	147136464	-	0.016	0.615777	0.778008	0.610204	0.54643	0.713953	0.635836	0.650035	0.7662	0.700312	0.643621	0.806212	0.794765	0.860067	0.761863	-0.111828
cg04459086	chr3	45429742	45429743	-	0.01	0.307763	0.397122	0.338361	0.336812	0.43293	0.323211	0.356033	0.674166	0.378988	0.369438	0.450243	0.519552	0.454756	0.474524	-0.11849
cg04502852	chr8	131450313	131450314	+	0.004	0.544567	0.667279	0.552153	0.589748	0.649253	0.565079	0.59468	0.654704	0.699558	0.653691	0.729164	0.748657	0.709857	0.699272	-0.104592
cg04506728	chr16	53407722	53407723	-	0.002	0.83131	0.9192	0.724467	0.568456	0.877467	0.902056	0.803826	0.917571	0.927155	0.9263	0.930238	0.951721	0.914218	0.927867	-0.124041
cg04523069	chr9	97136363	97136364	-	0.008	0.387824	0.374472	0.427023	0.381122	0.388017	0.417795	0.396042	0.345162	0.306867	0.251753	0.233619	0.280193	0.241027	0.276437	0.119606
cg04541368	chr5	92909429	92909430	+	0.006	0.506759	0.870623	0.691636	0.705009	0.806668	0.78103	0.726954	0.869444	0.84063	0.819601	0.894818	0.864796	0.89152	0.863468	-0.136514
cg04566826	chr19	34289872	34289873	-	0.001	0.688502	0.720404	0.681281	0.675538	0.739434	0.616477	0.686939	0.754904	0.807747	0.759111	0.868324	0.788148	0.746225	0.78741	-0.100471
cg04595505	chr2	50572944	50572945	-	0.009	0.562488	0.747592	0.609093	0.648869	0.69283	0.614015	0.645814	0.672221	0.797786	0.687938	0.772337	0.758454	0.786173	0.745818	-0.100004
cg04605816	chr20	62092443	62092444	+	0.006	0.695528	0.69838	0.649293	0.687359	0.726929	0.669573	0.687844	0.686953	0.822037	0.761568	0.824937	0.83168	0.848054	0.795872	-0.108028
cg04622541	chr5	179159255	179159256	+	0.016	0.332186	0.572829	0.441581	0.435111	0.459533	0.42836	0.444933	0.445706	0.582883	0.451253	0.597909	0.657185	0.651965	0.564483	-0.11955
cg04653913	chr16	53407753	53407754	+	0.031	0.606317	0.806459	0.548474	0.376175	0.786191	0.715816	0.639905	0.763144	0.772899	0.716822	0.803526	0.852758	0.792963	0.783685	-0.14378
cg04682791	chr6	25313030	25313031	+	0.011	0.288293	0.372324	0.372877	0.336322	0.356742	0.366621	0.348863	0.404707	0.528856	0.319197	0.50205	0.510784	0.558661	0.470709	-0.121846
cg04709035	chr2	468737	468738	-	0.021	0.798125	0.788385	0.850028	0.756102	0.767013	0.750864	0.785086	0.63383	0.674019	0.60138	0.799694	0.687597	0.675314	0.678639	0.106447
cg04720116	chr10	679221	679222	-	0.05	0.587355	0.86946	0.629254	0.704237	0.67325	0.629603	0.682193	0.704444	0.688832	0.692006	0.910138	0.857476	0.92139	0.795714	-0.113521
cg04723343	chr2	238647913	238647914	+	0.001	0.63347	0.693382	0.639431	0.624848	0.725516	0.61146	0.654685	0.738836	0.732921	0.70649	0.792359	0.794067	0.795175	0.759975	-0.10529
cg04726702	chr2	557669	557670	+	0.002	0.685299	0.848872	0.705123	0.82237	0.795897	0.692463	0.758337	0.862492	0.821382	0.828757	0.919426	0.871373	0.873347	0.862796	-0.104459
cg04745408	chrX	107068901	107068902	-	0.003	0.242229	0.514144	0.484205	0.315569	0.447679	0.47837	0.413699	0.514397	0.550913	0.496939	0.568648	0.551488	0.582873	0.54421	-0.13051
cg04751149	chr2	66673449	66673450	-	0.024	0.462662	0.429943	0.491412	0.432517	0.61838	0.472963	0.484646	0.539666	0.553526	0.510596	0.571478	0.647109	0.697669	0.586674	-0.102028
cg04757350	chr10	71529128	71529129	-	0.004	0.651688	0.754044	0.700392	0.625431	0.779091	0.625683	0.689388	0.756122	0.779042	0.773973	0.850663	0.842479	0.777389	0.796611	-0.107223
cg04819497	chr11	58598444	58598445	+	0.034	0.764099	0.73762	0.553373	0.739077	0.705973	0.242693	0.623806	0.727927	0.793585	0.74407	0.822847	0.719637	0.757893	0.760993	-0.137187
cg04833713	chr10	74871078	74871079	-	0.012	0.692516	0.822101	0.696334	0.741742	0.772966	0.852268	0.762988	0.777779	0.806601	0.895423	0.88078	0.904984	0.93726	0.867138	-0.10415
cg04838832	chr10	72502473	72502474	-	0.009	0.483848	0.694084	0.599449	0.573556	0.711391	0.578501	0.606805	0.696409	0.740296	0.655542	0.80381	0.796368	0.681058	0.728914	-0.122109
cg04862679	chr11	59578540	59578541	+	0.02	0.421566	0.581213	0.412521	0.473599	0.494998	0.371711	0.459268	0.480982	0.596689	0.430527	0.602647	0.64763	0.606226	0.560784	-0.101516
cg04880138	chr11	1007119	1007120	-	0.006	0.657726	0.667557	0.743264	0.625598	0.723597	0.613927	0.671945	0.698743	0.743598	0.804487	0.762532	0.867584	0.81047	0.781236	-0.109291
cg04887076	chr19	55477653	55477654	-	0.007	0.820911	0.769022	0.716141	0.456097	0.619922	0.681383	0.677246	0.868741	0.726135	0.808151	0.840836	0.849155	0.836221	0.82154	-0.144294
cg04892437	chr1	231737901	231737902	-	0.032	0.839213	0.635346	0.541633	0.496543	0.936446	0.896746	0.724321	0.93041	0.882545	0.887917	0.89747	0.928265	0.893682	0.903382	-0.17906
cg04904276	chr16	11835562	11835563	+	0.032	0.546915	0.844907	0.61727	0.801999	0.711182	0.652393	0.695778	0.748722	0.801237	0.701815	0.893367	0.830838	0.850336	0.804386	-0.108608
cg04906816	chr14	69263302	69263303	+	0	0.399451	0.573705	0.486715	0.528842	0.592787	0.599262	0.530127	0.59471	0.675011	0.606413	0.67811	0.744131	0.668263	0.661107	-0.13098
cg04910041	chr8	22877791	22877792	+	0.028	0.378806	0.649791	0.442518	0.525759	0.577362	0.530093	0.517388	0.522419	0.643541	0.576364	0.650004	0.663654	0.653353	0.618222	-0.100834
cg04912712	chr14	89817982	89817983	+	0.001	0.451376	0.555629	0.517825	0.46538	0.600342	0.554789	0.524224	0.597364	0.640349	0.669607	0.741167	0.689788	0.669579	0.667975	-0.143752
cg04926881	chr7	29024378	29024379	+	0.01	0.359697	0.548721	0.516951	0.511452	0.492984	0.459815	0.481603	0.478036	0.582162	0.535126	0.667738	0.681894	0.610789	0.592624	-0.111021
cg04931216	chr1	50885132	50885133	-	0.024	0.189486	0.440406	0.222931	0.387309	0.394568	0.347484	0.330364	0.392842	0.459827	0.325312	0.464466	0.487237	0.499604	0.438215	-0.107851
cg04993605	chr1	28573052	28573053	-	0.006	0.136936	0.311235	0.140035	0.57631	0.273683	0.193323	0.27192	0.615501	0.900258	0.627662	0.416858	0.916245	0.376289	0.642135	-0.370215
cg05036106	chr10	119292587	119292588	+	0.026	0.472235	0.588054	0.498567	0.477257	0.635879	0.538131	0.535021	0.612118	0.501467	0.593009	0.61812	0.806863	0.73851	0.645014	-0.109994
cg05049335	chr11	66103889	66103890	+	0.007	0.141751	0.227984	0.139287	0.24542	0.175833	0.182454	0.185455	0.19408	0.344096	0.203529	0.300551	0.33833	0.34024	0.286805	-0.10135
cg05165087	chr5	127090297	127090298	-	0.006	0.616404	0.73632	0.633651	0.558266	0.756933	0.658942	0.660086	0.789975	0.793002	0.74538	0.706726	0.73717	0.803172	0.762571	-0.102485
cg05169454	chr2	38602911	38602912	-	0.002	0.622044	0.653672	0.608857	0.590331	0.620034	0.555107	0.608341	0.642888	0.772318	0.672918	0.769967	0.775668	0.713279	0.724507	-0.116166
cg05213296	chr6	111302729	111302730	-	0.002	0.425367	0.558597	0.569698	0.442319	0.0425564	0.476206	0.419124	0.625731	0.484979	0.6912	0.717426	0.722751	0.662674	0.650794	-0.23167
cg05263838	chr2	227659406	227659407	+	0.011	0.589557	0.739172	0.587191	0.664053	0.666287	0.661271	0.651255	0.644678	0.705754	0.770644	0.781667	0.798732	0.847858	0.758222	-0.106967
cg05269440	chr2	92262806	92262807	+	0.001	0.737186	0.761022	0.760989	0.559013	0.709039	0.728147	0.709233	0.820185	0.771908	0.810203	0.862539	0.794623	0.812344	0.811967	-0.102734
cg05277096	chr3	73672998	73672999	-	0.013	0.366121	0.558032	0.439251	0.391995	0.590484	0.421418	0.461217	0.599735	0.57883	0.470308	0.633382	0.592991	0.579263	0.575751	-0.114535
cg05313129	chr8	58192883	58192884	+	0.001	0.574405	0.732941	0.729843	0.698365	0.742295	0.706137	0.697331	0.809696	0.805172	0.757004	0.854734	0.794854	0.841104	0.810427	-0.113096
cg05364884	chr16	17107768	17107769	-	0.018	0.6374	0.820899	0.65506	0.615042	0.787815	0.692627	0.701474	0.805679	0.783034	0.714423	0.811013	0.854011	0.843783	0.80199	-0.100517
cg05388281	chr4	125504	125505	-	0.015	0.435634	0.231479	0.200885	0.171244	0.256535	0.209817	0.250932	0.245661	0.280906	0.410965	0.541779	0.474841	0.535151	0.414884	-0.163952
cg05423712	chr8	605100	605101	-	0.021	0.696378	0.593422	0.697064	0.695362	0.637185	0.749019	0.678071	0.569867	0.506019	0.62501	0.363088	0.519641	0.538797	0.520404	0.157668
cg05496543	chr16	77467409	77467410	+	0.004	0.705695	0.682808	0.727876	0.641496	0.781054	0.676405	0.702555	0.791915	0.792693	0.748521	0.880175	0.847429	0.854237	0.819162	-0.116606
cg05501958	chr19	45411873	45411874	-	0.026	0.768222	0.976441	0.76425	0.925017	0.876041	0.802555	0.852088	0.863087	0.978523	0.945414	0.976235	0.97838	0.976029	0.952945	-0.100857
cg05520031	chr9	129262012	129262013	+	0.018	0.412284	0.588346	0.417546	0.431656	0.56361	0.439451	0.475482	0.503991	0.507971	0.597654	0.665186	0.632902	0.625639	0.588891	-0.113408
cg05573767	chr6	167171394	167171395	+	0.009	0.30189	0.483387	0.405393	0.427474	0.415498	0.414167	0.407968	0.54715	0.583742	0.387355	0.530997	0.481958	0.573779	0.517497	-0.109529
cg05598886	chr16	2140431	2140432	+	0.036	0.56886	0.514426	0.54728	0.545598	0.515941	0.555512	0.54127	0.458367	0.478825	0.518359	0.310556	0.381472	0.46565	0.435538	0.105731
cg05626376	chr6	31938847	31938848	+	0.017	0.735851	0.887317	0.689705	0.83489	0.839928	0.717074	0.784127	0.805446	0.916395	0.871789	0.952856	0.884608	0.954468	0.897594	-0.113466
cg05638139	chr17	79001027	79001028	-	0.009	0.574379	0.822719	0.62838	0.696853	0.636722	0.628729	0.66463	0.673499	0.81323	0.75153	0.8574	0.871843	0.858094	0.804266	-0.139636
cg05705335	chr16	81520589	81520590	-	0.009	0.708046	0.825608	0.736449	0.757537	0.850833	0.703935	0.763735	0.842508	0.849764	0.810007	0.902604	0.942169	0.922001	0.878176	-0.114441
cg05720891	chr17	79001080	79001081	+	0.011	0.655313	0.844148	0.690784	0.75115	0.610101	0.717048	0.711424	0.697458	0.834267	0.789518	0.89253	0.901584	0.894842	0.835033	-0.123609
cg05724997	chr18	60988056	60988057	-	0.012	0.125068	0.215289	0.166039	0.17531	0.259059	0.255022	0.199298	0.382234	0.252624	0.253462	0.230044	0.385294	0.316382	0.30334	-0.104042
cg05749642	chr16	89982268	89982269	-	0.017	0.734236	0.861443	0.653966	0.633266	0.588562	0.688829	0.693384	0.736473	0.806371	0.922949	0.841955	0.777786	0.792094	0.812938	-0.119554
cg05758978	chr7	44614305	44614306	+	0.038	0.612125	0.840636	0.710479	0.788408	0.75355	0.648207	0.725567	0.728233	0.747759	0.821191	0.857021	0.90942	0.895987	0.826602	-0.101034
cg05769153	chr19	53636398	53636399	+	0.002	0.272118	0.546721	0.304349	0.566116	0.396466	0.47983	0.4276	0.519267	0.697869	0.632661	0.661597	0.729301	0.738397	0.663182	-0.235582
cg05812089	chr11	19736648	19736649	+	0.007	0.491817	0.601008	0.609933	0.579322	0.644354	0.503316	0.571625	0.67054	0.648311	0.595993	0.713833	0.792538	0.619807	0.673504	-0.101879
cg05813818	chr16	875966	875967	-	0.004	0.688395	0.85008	0.739915	0.797392	0.769654	0.641466	0.747817	0.811035	0.846602	0.817643	0.902826	0.908085	0.866011	0.8587	-0.110883
cg05826245	chr12	10827400	10827401	+	0.049	0.327847	0.553531	0.296638	0.510085	0.254102	0.527747	0.411658	0.609716	0.458895	0.536194	0.457977	0.518006	0.58088	0.526945	-0.115286
cg05830842	chr8	121208681	121208682	+	0.047	0.537977	0.545407	0.555953	0.516513	0.71047	0.481076	0.557899	0.716501	0.607535	0.514122	0.703809	0.756808	0.674531	0.662218	-0.104318
cg05893674	chr3	96495966	96495967	-	0.003	0.728693	0.814913	0.582674	0.791366	0.801518	0.754088	0.745542	0.821824	0.849195	0.873909	0.887376	0.795903	0.863553	0.848627	-0.103085
cg05903289	chr2	130345205	130345206	+	0.017	0.649234	0.393944	0.264692	0.417419	0.695643	0.415276	0.472701	0.782153	0.592991	0.579421	0.78872	0.681313	0.665256	0.681642	-0.208941
cg05931551	chr1	52892210	52892211	-	0.001	0.562876	0.548169	0.588169	0.533794	0.6851	0.566095	0.580701	0.711504	0.721487	0.662922	0.685873	0.69191	0.686107	0.6933	-0.1126
cg05957749	chr1	39875787	39875788	+	0.008	0.424392	0.512758	0.46342	0.451404	0.441186	0.415692	0.451475	0.517008	0.564726	0.44406	0.661674	0.601387	0.526334	0.552531	-0.101056
cg05960677	chr2	152117363	152117364	-	0.001	0.280722	0.435784	0.421631	0.393499	0.409374	0.383768	0.387463	0.447589	0.585804	0.52937	0.420162	0.440003	0.593481	0.502735	-0.115272
cg05962382	chr2	130345044	130345045	-	0.021	0.727451	0.582361	0.594952	0.584394	0.791184	0.565852	0.641032	0.84332	0.724458	0.719954	0.855516	0.77486	0.717222	0.772555	-0.131523
cg06061257	chr17	71361901	71361902	-	0.025	0.115928	0.276357	0.152673	0.14453	0.284107	0.171275	0.190812	0.234782	0.236943	0.224237	0.430808	0.378413	0.262739	0.294654	-0.103842
cg06065608	chr6	163147999	163148000	-	0.039	0.453782	0.763669	0.552363	0.727152	0.548848	0.596301	0.607019	0.602576	0.726585	0.667061	0.821729	0.778042	0.69476	0.715126	-0.108106
cg06079347	chr1	246324811	246324812	-	0.021	0.951887	0.958774	0.958137	0.275008	0.955436	0.953323	0.842094	0.959276	0.953404	0.97656	0.951769	0.964993	0.966903	0.962151	-0.120056
cg06085204	chr17	6659164	6659165	-	0.003	0.608117	0.79757	0.699526	0.63954	0.741338	0.71413	0.700037	0.80756	0.772436	0.764743	0.831235	0.845499	0.846642	0.811353	-0.111316
cg06098276	chr17	76171208	76171209	+	0.03	0.498095	0.660527	0.408544	0.415463	0.53661	0.467586	0.497804	0.557591	0.617393	0.478465	0.690072	0.702411	0.623585	0.611586	-0.113782
cg06103624	chr15	66998926	66998927	+	0.038	0.830225	0.750479	0.834676	0.826848	0.814513	0.829267	0.814335	0.771903	0.720727	0.80465	0.551562	0.650046	0.723836	0.703787	0.110547
cg06112835	chr11	68658793	68658794	+	0.018	0.430674	0.740739	0.52461	0.631433	0.58328	0.408782	0.553253	0.713273	0.647532	0.554919	0.761231	0.785723	0.732949	0.699271	-0.146018
cg06115810	chr1	66797599	66797600	+	0.005	0.384124	0.614497	0.386829	0.493199	0.576397	0.478277	0.488887	0.644845	0.596721	0.542965	0.666455	0.773384	0.604169	0.63809	-0.149203
cg06206057	chr6	85134951	85134952	+	0.02	0.86015	0.652046	0.864349	0.870309	0.568115	0.824033	0.773167	0.861284	0.861246	0.83778	0.896673	0.880781	0.909564	0.874555	-0.101388
cg06232205	chr15	40120808	40120809	+	0.004	0.474373	0.508424	0.489792	0.451222	0.588626	0.398537	0.485162	0.613448	0.606073	0.603383	0.590385	0.570366	0.555012	0.589778	-0.104615
cg06234051	chr17	70120541	70120542	+	0.014	0.684921	0.709482	0.719648	0.769935	0.68479	0.681698	0.708413	0.828633	0.850359	0.791106	0.911427	0.882516	0.655261	0.819884	-0.111471
cg06269919	chr12	57597136	57597137	+	0.014	0.584492	0.705435	0.676955	0.601638	0.768825	0.597328	0.655779	0.746616	0.703192	0.710615	0.76792	0.818879	0.822073	0.761549	-0.10577
cg06309788	chr13	40026426	40026427	+	0.025	0.446092	0.735917	0.514075	0.512467	0.648089	0.597277	0.575653	0.601109	0.727814	0.650033	0.708081	0.709769	0.73287	0.688279	-0.112626
cg06325209	chr1	162602217	162602218	+	0.038	0.408435	0.471031	0.408498	0.345583	0.59227	0.359112	0.430821	0.52328	0.560071	0.422911	0.495703	0.655659	0.538525	0.532692	-0.10187
cg06356454	chr2	241631498	241631499	-	0.012	0.494103	0.893895	0.881351	0.853282	0.891904	0.884899	0.816572	0.940158	0.913286	0.958374	0.876689	0.926636	0.891944	0.917848	-0.101276
cg06372223	chr16	87899784	87899785	+	0.006	0.58647	0.785994	0.648554	0.690472	0.699476	0.590307	0.666879	0.705127	0.785095	0.733286	0.834325	0.840638	0.801838	0.783385	-0.116506
cg06375148	chr1	209958343	209958344	-	0.044	0.284119	0.456211	0.346919	0.28511	0.306533	0.43758	0.352745	0.481514	0.578035	0.263895	0.477968	0.433868	0.514179	0.458243	-0.105498
cg06419732	chr1	205498530	205498531	+	0.012	0.64289	0.839919	0.569793	0.846041	0.778023	0.650868	0.721256	0.755165	0.890417	0.875887	0.885721	0.855154	0.85907	0.853569	-0.132313
cg06433023	chr6	108488544	108488545	+	0.01	0.453484	0.715975	0.514659	0.641571	0.67545	0.557519	0.59311	0.739647	0.70478	0.643099	0.819325	0.771389	0.656213	0.722409	-0.129299
cg06533408	chr12	69139618	69139619	+	0.007	0.154507	0.32887	0.18085	0.252516	0.215228	0.234236	0.227701	0.24512	0.374204	0.344109	0.368924	0.351979	0.291461	0.3293	-0.101598
cg06550177	chr7	5469535	5469536	-	0.002	0.287137	0.346518	0.394596	0.195176	0.294632	0.317689	0.305958	0.367479	0.375219	0.613049	0.589875	0.468012	0.486507	0.483357	-0.177399
cg06570432	chr4	7301176	7301177	-	0.01	0.610438	0.533278	0.695703	0.576238	0.651146	0.541246	0.601342	0.693163	0.721023	0.705678	0.760987	0.792	0.623076	0.715988	-0.114646
cg06638811	chr9	137030555	137030556	+	0.001	0.327324	0.303958	0.312345	0.360238	0.38789	0.362921	0.342446	0.427346	0.465181	0.427612	0.389301	0.504605	0.457665	0.445285	-0.102839
cg06639870	chr2	152954155	152954156	+	0.004	0.281785	0.407749	0.311434	0.301542	0.283347	0.351176	0.322839	0.370573	0.410098	0.386977	0.436599	0.49254	0.459356	0.426024	-0.103185
cg06645778	chr2	64680425	64680426	+	0.003	0.62867	0.693599	0.69428	0.682947	0.658823	0.601853	0.660029	0.685296	0.86983	0.784166	0.839374	0.798234	0.753904	0.788467	-0.128438
cg06671623	chr15	99262351	99262352	+	0.01	0.550587	0.746852	0.623089	0.669986	0.695555	0.60309	0.648193	0.711551	0.760054	0.678729	0.844702	0.816044	0.70188	0.75216	-0.103967
cg06675417	chr18	77292443	77292444	+	0.03	0.589986	0.151556	0.5939	0.543719	0.168698	0.0993387	0.357866	0.666761	0.631982	0.365138	0.600034	0.627637	0.685705	0.59621	-0.238343
cg06676049	chr2	23839842	23839843	-	0.001	0.5616	0.585366	0.613575	0.563183	0.596059	0.546855	0.577773	0.638684	0.690513	0.62758	0.732714	0.712146	0.697046	0.683114	-0.105341
cg06679265	chr12	57040204	57040205	+	0.031	0.1056	0.22201	0.14068	0.186885	0.149957	0.17574	0.163479	0.412368	0.16309	0.108423	0.252235	0.491834	0.256972	0.28082	-0.117342
cg06745944	chr12	124246391	124246392	-	0.003	0.537128	0.525669	0.578767	0.492845	0.547581	0.577479	0.543245	0.544726	0.631346	0.592691	0.743727	0.674711	0.67807	0.644212	-0.100967
cg06773116	chr4	20884431	20884432	+	0.032	0.480956	0.714329	0.4829	0.657668	0.512947	0.54233	0.565188	0.56019	0.699493	0.552579	0.73459	0.771498	0.753032	0.678564	-0.113375
cg06777002	chr10	124266269	124266270	-	0.003	0.579416	0.760673	0.636291	0.784536	0.691639	0.61164	0.677366	0.746119	0.755083	0.807008	0.857277	0.858747	0.761356	0.797598	-0.120232
cg06814287	chr6	32120584	32120585	+	0.005	0.295224	0.37161	0.275892	0.316397	0.366681	0.312362	0.323027	0.370195	0.404358	0.324065	0.443113	0.530256	0.552583	0.437428	-0.114401
cg06833110	chr2	66673316	66673317	-	0.043	0.25147	0.203653	0.300863	0.281254	0.60447	0.410118	0.341971	0.517986	0.440474	0.379536	0.330085	0.641983	0.740876	0.50849	-0.166519
cg06875131	chr17	63554468	63554469	+	0.025	0.502476	0.630493	0.584557	0.491575	0.647104	0.528826	0.564172	0.638947	0.620431	0.561092	0.671593	0.761145	0.739367	0.665429	-0.101257
cg06882298	chr17	55163850	55163851	-	0.002	0.33525	0.473901	0.395192	0.3765	0.391085	0.335823	0.384625	0.459569	0.515158	0.550794	0.447947	0.550362	0.485227	0.501509	-0.116884
cg06889339	chr6	168197625	168197626	+	0.017	0.498028	0.585007	0.548868	0.443174	0.605484	0.57046	0.541837	0.549654	0.552266	0.635026	0.671886	0.724208	0.740228	0.645545	-0.103708
cg06889535	chr11	126455712	126455713	+	0.005	0.759019	0.660921	0.721833	0.652507	0.768604	0.732426	0.715885	0.732791	0.821298	0.845409	0.870464	0.828789	0.844675	0.823904	-0.108019
cg06934572	chr2	9458925	9458926	-	0.005	0.739102	0.798008	0.804172	0.729791	0.805841	0.659418	0.756055	0.810737	0.891664	0.796903	0.903772	0.917122	0.859572	0.863295	-0.10724
cg06989693	chr5	41409354	41409355	+	0.036	0.638319	0.890387	0.640324	0.677532	0.809636	0.697644	0.72564	0.801229	0.779817	0.734806	0.896863	0.894008	0.910764	0.836248	-0.110607
cg06994420	chr2	66672553	66672554	-	0.003	0.481613	0.451015	0.487327	0.539277	0.60064	0.528267	0.51469	0.570011	0.597504	0.635949	0.569674	0.682835	0.657097	0.618845	-0.104155
cg07044276	chr1	246859889	246859890	-	0.028	0.258736	0.447394	0.312245	0.462871	0.430301	0.357162	0.378118	0.393409	0.488711	0.458181	0.576017	0.587308	0.379905	0.480589	-0.102471
cg07059978	chr7	155299647	155299648	-	0.027	0.499848	0.714182	0.410228	0.563367	0.571918	0.594369	0.558985	0.564169	0.631068	0.593007	0.750674	0.786043	0.749783	0.679124	-0.120139
cg07099161	chr18	56935937	56935938	-	0.025	0.291088	0.574583	0.331723	0.53113	0.535491	0.372014	0.439338	0.533657	0.611106	0.432353	0.594936	0.577541	0.605981	0.559262	-0.119924
cg07110043	chr1	31846397	31846398	-	0.002	0.404489	0.0771328	0.05599	0.065626	0.0838875	0.0629147	0.125007	0.09313	0.484647	0.584435	0.516299	0.505687	0.421532	0.434288	-0.309282
cg07119830	chr10	104412306	104412307	-	0.033	0.559798	0.842577	0.738709	0.658407	0.797588	0.684188	0.713545	0.822096	0.720349	0.8328	0.827918	0.817866	0.871306	0.815389	-0.101845
cg07141605	chr12	133005406	133005407	+	0.029	0.565266	0.666951	0.706873	0.454109	0.721076	0.629952	0.624038	0.796257	0.64904	0.629823	0.750708	0.808415	0.918692	0.758823	-0.134785
cg07142009	chr17	6656315	6656316	+	0.02	0.582981	0.583123	0.605084	0.502143	0.641026	0.520866	0.572537	0.77469	0.69355	0.5287	0.704836	0.714597	0.695235	0.685268	-0.112731
cg07147350	chrX	146992908	146992909	+	0.028	0.317531	0.495955	0.29885	0.397985	0.408674	0.374513	0.382251	0.429403	0.444472	0.345135	0.564482	0.58294	0.588592	0.492504	-0.110252
cg07150777	chr2	239996253	239996254	+	0.039	0.622538	0.824509	0.696212	0.697858	0.816605	0.649431	0.717859	0.791688	0.752624	0.718846	0.834091	0.922811	0.915709	0.822628	-0.10477
cg07158339	chr9	71650237	71650238	-	0.005	0.436425	0.519479	0.336411	0.420268	0.376253	0.425039	0.418979	0.489051	0.589943	0.4439	0.537767	0.600575	0.557941	0.536529	-0.11755
cg07161827	chr2	71680559	71680560	+	0.026	0.291222	0.482428	0.247717	0.349939	0.31417	0.407727	0.348867	0.335118	0.44051	0.40417	0.537048	0.465907	0.519875	0.450438	-0.101571
cg07166784	chr1	10508703	10508704	-	0.037	0.662301	0.691559	0.689793	0.68878	0.747512	0.731248	0.701866	0.945442	0.920664	0.656661	0.71467	0.929556	0.785949	0.82549	-0.123625
cg07174665	chr4	129474594	129474595	-	0.004	0.57275	0.846738	0.600382	0.576211	0.688247	0.698186	0.663752	0.771892	0.776474	0.748005	0.846885	0.870331	0.893154	0.81779	-0.154038
cg07194250	chrX	133680463	133680464	+	0.004	0.730996	0.69651	0.72578	0.814164	0.711152	0.710045	0.731441	0.743166	0.82671	0.871825	0.922963	0.894278	0.788442	0.841231	-0.10979
cg07196462	chr2	391060	391061	-	0.031	0.690924	0.850859	0.688158	0.719564	0.870583	0.69011	0.7517	0.87613	0.909311	0.672947	0.880278	0.946256	0.925032	0.868326	-0.116626
cg07200421	chr8	124693396	124693397	+	0.001	0.827269	0.80779	0.780921	0.779791	0.85349	0.760587	0.801641	0.930478	0.956004	0.914899	0.830488	0.866447	0.939734	0.906342	-0.1047
cg07202054	chr1	48452740	48452741	+	0.006	0.302746	0.318484	0.362215	0.313025	0.419005	0.311769	0.337874	0.398181	0.514895	0.380985	0.397693	0.481988	0.48602	0.443294	-0.10542
cg07212541	chr15	101442710	101442711	+	0.004	0.499954	0.650631	0.506588	0.567518	0.645127	0.522403	0.56537	0.68061	0.623322	0.609697	0.74702	0.832482	0.769169	0.710383	-0.145013
cg07229767	chr4	3372206	3372207	-	0.023	0.329683	0.466441	0.348571	0.501313	0.406474	0.425576	0.41301	0.415671	0.47954	0.397692	0.609748	0.623691	0.612829	0.523195	-0.110185
cg07232945	chr1	203096570	203096571	-	0.014	0.402124	0.460881	0.29628	0.396638	0.342171	0.381775	0.379978	0.369903	0.559233	0.463635	0.535342	0.425825	0.556888	0.485138	-0.105159
cg07233700	chr1	28261706	28261707	-	0.013	0.119453	0.29934	0.137047	0.10911	0.106234	0.252166	0.170558	0.222112	0.32417	0.249956	0.279232	0.271259	0.351354	0.283014	-0.112455
cg07249765	chr7	4244643	4244644	-	0.005	0.62704	0.975816	0.667221	0.586274	0.691234	0.531601	0.679864	0.828128	0.971905	0.980053	0.969886	0.957936	0.96129	0.944866	-0.265002
cg07325168	chr7	38949140	38949141	+	0.012	0.313605	0.594531	0.359154	0.430244	0.517322	0.45935	0.445701	0.56483	0.559593	0.457171	0.632401	0.598903	0.583794	0.566115	-0.120414
cg07326602	chr11	68495403	68495404	+	0.028	0.416519	0.377795	0.395369	0.599189	0.474703	0.401286	0.444143	0.413286	0.602042	0.921552	0.529889	0.513842	0.563013	0.590604	-0.146461
cg07338782	chr12	101480470	101480471	-	0.01	0.474973	0.490236	0.507305	0.445697	0.334042	0.444034	0.449381	0.428634	0.506973	0.607051	0.544386	0.587259	0.625323	0.549937	-0.100556
cg07339393	chr10	3789537	3789538	-	0.037	0.472977	0.957426	0.528035	0.778201	0.845878	0.543179	0.687616	0.822613	0.937213	0.589366	0.965004	0.97061	0.966446	0.875209	-0.187593
cg07347205	chr16	87159274	87159275	-	0.008	0.680347	0.860948	0.802581	0.695291	0.856115	0.751667	0.774492	0.876643	0.870393	0.809366	0.899392	0.903439	0.914705	0.87899	-0.104498
cg07388493	chr1	39491459	39491460	-	0.003	0.541853	0.650163	0.55149	0.580798	0.58773	0.51452	0.571092	0.660475	0.678325	0.586821	0.689612	0.73586	0.703984	0.675846	-0.104754
cg07546654	chr11	1320546	1320547	+	0.006	0.579134	0.82927	0.716713	0.768416	0.705612	0.679776	0.713154	0.775817	0.878392	0.774858	0.869301	0.877165	0.803888	0.829903	-0.11675
cg07617237	chr6	31786747	31786748	-	0.036	0.636018	0.808323	0.656562	0.728783	0.73794	0.650241	0.702978	0.63244	0.83493	0.736092	0.83279	0.929939	0.865606	0.8053	-0.102322
cg07652786	chr2	241726053	241726054	+	0.035	0.625253	0.66347	0.834906	0.617963	0.657045	0.800359	0.699833	0.764723	0.851339	0.744297	0.778279	0.882914	0.780538	0.800348	-0.100516
cg07687131	chr12	93967580	93967581	-	0.004	0.478638	0.54753	0.493979	0.536648	0.532645	0.441879	0.50522	0.545218	0.687366	0.543207	0.573524	0.68266	0.672057	0.617339	-0.112119
cg07690326	chr8	145019032	145019033	+	0.005	0.620662	0.696337	0.68304	0.672352	0.741567	0.607823	0.670297	0.80339	0.777711	0.706476	0.792624	0.82325	0.756522	0.776662	-0.106366
cg07695269	chr4	7394902	7394903	+	0.046	0.460919	0.63988	0.520065	0.502965	0.620357	0.463915	0.534683	0.610769	0.55884	0.497547	0.731547	0.710773	0.700072	0.634925	-0.100241
cg07698196	chr7	150485638	150485639	-	0.026	0.352328	0.480237	0.556526	0.462976	0.556516	0.416962	0.470924	0.623588	0.639945	0.429111	0.505301	0.756707	0.599409	0.592343	-0.121419
cg07771160	chr21	28335945	28335946	-	0.019	0.443416	0.384357	0.541666	0.464655	0.431712	0.417974	0.447297	0.253764	0.30416	0.413248	0.322242	0.285229	0.292804	0.311908	0.135389
cg07778983	chr19	56905383	56905384	+	0.031	0.483525	0.602348	0.582591	0.506557	0.493281	0.600746	0.544841	0.483896	0.675796	0.644314	0.556455	0.815299	0.739052	0.652469	-0.107627
cg07814122	chr12	13196942	13196943	+	0.001	0.497634	0.672252	0.5374	0.603398	0.520896	0.504742	0.556054	0.750539	0.638314	0.758435	0.649182	0.790733	0.68287	0.711679	-0.155625
cg07833262	chr10	119296182	119296183	-	0.043	0.366447	0.593766	0.41157	0.468258	0.586589	0.445627	0.47871	0.589061	0.418427	0.469256	0.618217	0.736716	0.733521	0.5942	-0.11549
cg07835051	chr18	56935446	56935447	-	0.026	0.256913	0.612009	0.285355	0.577856	0.545565	0.370644	0.44139	0.587396	0.584998	0.393347	0.587811	0.616875	0.61343	0.563976	-0.122586
cg07906931	chr16	84683290	84683291	-	0.006	0.584687	0.745173	0.678581	0.597574	0.727865	0.681258	0.66919	0.718115	0.754249	0.758909	0.8003	0.851338	0.777549	0.776743	-0.107554
cg07952905	chr17	27275352	27275353	-	0.014	0.387918	0.629105	0.4142	0.549152	0.443404	0.509436	0.488869	0.488308	0.569437	0.63959	0.644094	0.661219	0.67477	0.612903	-0.124034
cg07998951	chr7	152456579	152456580	-	0.011	0.426921	0.577048	0.405823	0.54591	0.475524	0.444094	0.47922	0.538989	0.586434	0.467563	0.610004	0.697403	0.629614	0.588335	-0.109115
cg08006625	chr16	51147491	51147492	-	0.003	0.476102	0.622008	0.512239	0.50181	0.542363	0.582966	0.539581	0.581574	0.62246	0.618996	0.746007	0.657692	0.705642	0.655395	-0.115814
cg08018143	chr4	162110754	162110755	+	0.033	0.48874	0.716095	0.508762	0.441865	0.642789	0.49655	0.549134	0.704032	0.635668	0.505324	0.649423	0.778746	0.785372	0.676427	-0.127294
cg08027265	chr7	2291960	2291961	+	0.024	0.942657	0.787595	0.692534	0.661445	0.684047	0.649525	0.736301	0.868089	0.964121	0.852686	0.893007	0.955723	0.734893	0.878087	-0.141786
cg08045906	chr6	32120625	32120626	-	0.014	0.298602	0.431642	0.259101	0.616932	0.419501	0.412083	0.40631	0.506744	0.457348	0.437818	0.607037	0.653142	0.754601	0.569448	-0.163138
cg08063051	chr16	1428706	1428707	-	0.019	0.627575	0.780685	0.693179	0.743684	0.600587	0.655411	0.68352	0.65548	0.807155	0.721247	0.829962	0.86248	0.828582	0.784151	-0.100631
cg08106279	chr1	2060014	2060015	-	0.001	0.614838	0.696389	0.67643	0.699434	0.695072	0.53953	0.653615	0.732093	0.792239	0.72756	0.77456	0.74003	0.761166	0.754608	-0.100992
cg08120462	chr15	90118174	90118175	+	0.016	0.163749	0.249443	0.197412	0.207131	0.326283	0.244427	0.231408	0.376641	0.406939	0.192418	0.343938	0.479286	0.377776	0.362833	-0.131425
cg08183724	chr20	21497429	21497430	+	0.002	0.472252	0.563636	0.544424	0.547899	0.520142	0.536445	0.5308	0.551066	0.716225	0.634322	0.726464	0.615428	0.595235	0.63979	-0.10899
cg08188318	chr6	34984953	34984954	-	0.028	0.519536	0.781717	0.407787	0.617954	0.625962	0.45955	0.568751	0.558399	0.786013	0.585146	0.776103	0.864541	0.856358	0.73776	-0.169009
cg08194377	chr6	34984836	34984837	-	0.047	0.546333	0.762407	0.529211	0.611942	0.716492	0.439941	0.601054	0.588506	0.70135	0.631501	0.767027	0.834258	0.811935	0.72243	-0.121375
cg08206881	chr2	12317357	12317358	+	0.01	0.446041	0.43251	0.52648	0.427977	0.419028	0.391152	0.440531	0.409052	0.586531	0.551717	0.615374	0.594425	0.628512	0.564268	-0.123737
cg08231577	chr1	117077088	117077089	+	0.005	0.646732	0.634222	0.590535	0.595824	0.692555	0.582094	0.62366	0.838838	0.7324	0.630745	0.743799	0.838192	0.907293	0.781878	-0.158218
cg08288016	chr4	187590536	187590537	-	0.032	0.83109	0.845132	0.823898	0.696381	0.700926	0.761516	0.776491	0.746908	0.937002	0.808801	0.930586	0.924487	0.936851	0.880773	-0.104282
cg08324703	chr10	679514	679515	+	0.042	0.451528	0.628655	0.493927	0.569788	0.661377	0.49889	0.550694	0.508837	0.743831	0.534461	0.796431	0.745372	0.685966	0.66915	-0.118456
cg08340755	chr20	30176106	30176107	+	0.007	0.496207	0.58966	0.522597	0.502815	0.584601	0.490394	0.531046	0.730084	0.660843	0.531402	0.710881	0.695909	0.654235	0.663892	-0.132846
cg08341791	chrX	25037584	25037585	+	0.01	0.598247	0.860956	0.459521	0.678044	0.704063	0.60146	0.650382	0.8072	0.754222	0.760132	0.912147	0.895263	0.807084	0.822675	-0.172293
cg08373528	chr6	42672105	42672106	+	0.025	0.501768	0.57945	0.487373	0.534401	0.507083	0.714618	0.554116	0.503904	0.722137	0.688393	0.779384	0.706522	0.711291	0.685272	-0.131156
cg08406102	chr10	119292130	119292131	+	0.036	0.156777	0.355283	0.212194	0.237348	0.445442	0.265099	0.278691	0.457039	0.199843	0.328017	0.374567	0.598837	0.539077	0.41623	-0.137539
cg08407014	chr19	2541104	2541105	-	0.008	0.711311	0.738207	0.772653	0.710466	0.806514	0.686105	0.737543	0.823947	0.867178	0.741417	0.871718	0.91937	0.847723	0.845226	-0.107683
cg08447739	chr10	124220359	124220360	+	0.017	0.336413	0.385513	0.468099	0.429045	0.319207	0.321494	0.376628	0.34754	0.552893	0.384341	0.774312	0.563089	0.600744	0.537153	-0.160525
cg08463820	chr7	157453872	157453873	-	0.019	0.746888	0.937434	0.834443	0.818825	0.758026	0.762146	0.809627	0.926465	0.822671	0.820058	0.975929	0.959959	0.958289	0.910562	-0.100935
cg08482837	chr2	86038423	86038424	-	0.001	0.516491	0.541531	0.565139	0.523163	0.647011	0.500252	0.548931	0.705697	0.671343	0.655289	0.632709	0.663683	0.843478	0.695367	-0.146435
cg08538034	chr1	14928945	14928946	-	0.004	0.197748	0.262734	0.319698	0.308916	0.200048	0.242694	0.255307	0.30491	0.404922	0.290434	0.386998	0.458676	0.507991	0.392322	-0.137015
cg08572315	chr2	85133831	85133832	+	0.011	0.963283	0.950103	0.951447	0.948509	0.93764	0.949451	0.950072	0.770788	0.709888	0.697586	0.946198	0.763711	0.694948	0.763853	0.186219
cg08572565	chr14	51298737	51298738	+	0.033	0.460424	0.502762	0.536248	0.326263	0.439351	0.525582	0.465105	0.521861	0.600885	0.437102	0.673944	0.588244	0.584534	0.567761	-0.102656
cg08614082	chr6	158375684	158375685	-	0.025	0.307447	0.508221	0.350902	0.359997	0.478033	0.374142	0.396457	0.446582	0.500458	0.375276	0.542793	0.545074	0.587138	0.499554	-0.103097
cg08646313	chr8	98058371	98058372	-	0	0.526345	0.611452	0.64869	0.618245	0.639384	0.565886	0.601667	0.70103	0.715927	0.721173	0.725652	0.682862	0.713576	0.710037	-0.10837
cg08654091	chr1	227015418	227015419	-	0.004	0.674507	0.779222	0.726035	0.696368	0.770338	0.630841	0.712885	0.818664	0.844482	0.780461	0.866911	0.882219	0.760383	0.82552	-0.112635
cg08690999	chr5	92923396	92923397	-	0.024	0.610623	0.647483	0.670222	0.657904	0.769487	0.607137	0.660476	0.819766	0.810243	0.645701	0.810227	0.781174	0.701535	0.761441	-0.100965
cg08729686	chr15	99194624	99194625	-	0.003	0.596013	0.707193	0.6466	0.556059	0.679417	0.698237	0.647253	0.661686	0.731185	0.736349	0.82564	0.847209	0.810893	0.768827	-0.121574
cg08805241	chr17	55110904	55110905	-	0.001	0.657659	0.692104	0.685369	0.66097	0.715707	0.638487	0.675049	0.761563	0.802732	0.736817	0.845365	0.805752	0.741672	0.782317	-0.107268
cg08808042	chr16	88053104	88053105	-	0.004	0.550216	0.797993	0.718746	0.79543	0.627951	0.682515	0.695475	0.852847	0.814151	0.863379	0.889371	0.788358	0.73881	0.824486	-0.129011
cg08831348	chr19	46142212	46142213	+	0.037	0.439011	0.503066	0.536316	0.283375	0.440279	0.513513	0.452593	0.588303	0.475229	0.40523	0.729616	0.574628	0.612395	0.564233	-0.11164
cg08839808	chr6	156983304	156983305	+	0.007	0.828734	0.896859	0.81144	0.893603	0.502693	0.769935	0.783877	0.90565	0.898165	0.889383	0.913312	0.890413	0.906221	0.900524	-0.116647
cg08844325	chr2	9459368	9459369	+	0.015	0.662012	0.93906	0.721144	0.847574	0.68417	0.721715	0.762612	0.835488	0.93492	0.810397	0.945486	0.968408	0.938792	0.905582	-0.142969
cg08972081	chr3	139259435	139259436	-	0.048	0.506423	0.742063	0.603916	0.430446	0.640289	0.512167	0.572551	0.649337	0.593955	0.580144	0.711366	0.751466	0.782457	0.678121	-0.10557
cg08973950	chr7	1083309	1083310	+	0.014	0.687629	0.911519	0.747866	0.774015	0.859038	0.722851	0.78382	0.844835	0.894776	0.820339	0.941019	0.94432	0.932161	0.896242	-0.112422
cg08994384	chr3	62363642	62363643	-	0.036	0.317024	0.748421	0.433998	0.60286	0.541477	0.494138	0.522986	0.567318	0.69137	0.4704	0.769528	0.784549	0.804325	0.681248	-0.158262
cg09012001	chr1	19250279	19250280	-	0.002	0.518206	0.493155	0.606974	0.543768	0.650553	0.440105	0.542127	0.664732	0.61814	0.663438	0.667812	0.808257	0.667377	0.681626	-0.139499
cg09012594	chr10	21464258	21464259	-	0.006	0.584042	0.720427	0.689075	0.679351	0.742997	0.627853	0.673958	0.722412	0.782889	0.704961	0.822929	0.850937	0.773371	0.77625	-0.102292
cg09048129	chr11	119234607	119234608	-	0.003	0.32109	0.448767	0.419644	0.379213	0.483982	0.338044	0.398456	0.428521	0.517386	0.484291	0.531511	0.587117	0.532514	0.513556	-0.1151
cg09055236	chr7	2673197	2673198	+	0.016	0.140082	0.275161	0.252854	0.262988	0.186943	0.228336	0.224394	0.200823	0.405509	0.282555	0.473221	0.310754	0.355607	0.338078	-0.113684
cg09065629	chr16	1709722	1709723	+	0.003	0.580329	0.530237	0.564347	0.478701	0.510135	0.540174	0.533987	0.555124	0.677728	0.665089	0.74017	0.61351	0.723566	0.662531	-0.128544
cg09072408	chr11	118663568	118663569	-	0.004	0.117123	0.175067	0.109159	0.0769838	0.113172	0.129147	0.120109	0.1923	0.53094	0.154214	0.189502	0.156402	0.164055	0.231235	-0.111127
cg09098195	chr4	42155260	42155261	+	0.013	0.587968	0.553667	0.469638	0.451665	0.450338	0.418025	0.48855	0.535552	0.568345	0.629923	0.594873	0.52894	0.678703	0.589389	-0.100839
cg09120395	chr16	70745992	70745993	-	0.039	0.703469	0.61432	0.661592	0.656222	0.628799	0.630938	0.649223	0.54746	0.563975	0.639207	0.421192	0.497116	0.604193	0.545524	0.103699
cg09159452	chr7	2609861	2609862	-	0.033	0.738771	0.708948	0.629257	0.660106	0.770186	0.731898	0.706528	0.604919	0.579525	0.702553	0.545002	0.550863	0.641421	0.604047	0.102481
cg09190051	chr15	57026056	57026057	-	0.044	0.441872	0.625255	0.347922	0.512911	0.506146	0.576817	0.50182	0.457939	0.553167	0.588694	0.632078	0.711148	0.738218	0.613541	-0.11172
cg09217215	chr11	31829582	31829583	+	0.008	0.62639	0.743953	0.692695	0.712921	0.821827	0.636114	0.70565	0.825743	0.825994	0.740764	0.846602	0.840722	0.823714	0.817256	-0.111607
cg09228194	chr6	33405457	33405458	+	0.05	0.484023	0.743804	0.510613	0.495705	0.645877	0.535239	0.56921	0.671113	0.579948	0.523591	0.724042	0.789365	0.818612	0.684445	-0.115235
cg09230658	chrY	14081314	14081315	+	0.007	0.315315	0.267041	0.233317	0.25871	0.226867	0.373774	0.279171	0.348722	0.406043	0.395893	0.418093	0.369518	0.36091	0.383197	-0.104026
cg09232555	chr8	11619866	11619867	-	0.017	0.597794	0.941326	0.701303	0.786244	0.863748	0.917858	0.801379	0.926252	0.915473	0.904151	0.938862	0.92021	0.909846	0.919132	-0.117753
cg09240693	chr2	86038538	86038539	+	0.007	0.514744	0.631301	0.552858	0.524954	0.703587	0.551943	0.579898	0.656009	0.690074	0.634859	0.711605	0.74655	0.819893	0.709831	-0.129934
cg09262171	chr16	4140361	4140362	-	0.018	0.587928	0.8084	0.659926	0.630049	0.753582	0.695806	0.689282	0.735487	0.760704	0.728792	0.860394	0.855221	0.810924	0.79192	-0.102638
cg09269891	chr16	3843415	3843416	-	0.003	0.661182	0.678354	0.696775	0.615034	0.669804	0.543504	0.644109	0.675444	0.808694	0.757351	0.830775	0.739076	0.718479	0.75497	-0.110861
cg09305503	chr17	9088206	9088207	-	0.004	0.779808	0.78978	0.72671	0.816747	0.766211	0.689185	0.761407	0.777585	0.875994	0.874564	0.916041	0.922648	0.870707	0.872923	-0.111516
cg09326832	chr6	7243643	7243644	-	0.016	0.209217	0.362782	0.160091	0.249611	0.290714	0.258476	0.255148	0.267014	0.296394	0.311337	0.390094	0.404685	0.49799	0.361252	-0.106104
cg09363068	chr7	1004748	1004749	+	0.028	0.197189	0.591438	0.261353	0.441039	0.269146	0.382843	0.357168	0.390913	0.503364	0.319391	0.718954	0.659923	0.603347	0.532649	-0.175481
cg09381737	chr9	140173549	140173550	-	0.007	0.489831	0.566753	0.557935	0.490629	0.608598	0.439903	0.525608	0.602169	0.571569	0.625179	0.650556	0.630512	0.835143	0.652521	-0.126913
cg09436545	chr16	71496735	71496736	-	0.025	0.41576	0.577805	0.395939	0.41539	0.334534	0.434295	0.428954	0.392364	0.628337	0.518555	0.519569	0.580137	0.586625	0.537598	-0.108644
cg09451188	chr13	45989144	45989145	+	0.028	0.234574	0.454128	0.531424	0.351772	0.461074	0.336214	0.394865	0.444771	0.472916	0.428391	0.630625	0.543734	0.536144	0.50943	-0.114566
cg09451215	chr6	82459960	82459961	+	0.04	0.330667	0.696872	0.40924	0.549158	0.513894	0.48458	0.497402	0.563182	0.702998	0.364883	0.738526	0.74017	0.709875	0.636605	-0.139204
cg09483067	chr12	6451298	6451299	+	0.017	0.454262	0.606776	0.511636	0.368913	0.575975	0.4764	0.498994	0.642853	0.588745	0.572672	0.641341	0.636317	0.520683	0.600435	-0.101442
cg09535924	chr2	66671659	66671660	+	0.003	0.549406	0.64062	0.620036	0.661307	0.692509	0.611846	0.629287	0.652899	0.755811	0.736304	0.808367	0.798279	0.804347	0.759334	-0.130047
cg09550083	chr2	66672337	66672338	-	0.002	0.706318	0.703822	0.794586	0.735496	0.816375	0.735796	0.748732	0.808442	0.860949	0.833301	0.834987	0.899596	0.885422	0.853783	-0.105051
cg09565404	chr5	108083489	108083490	-	0.01	0.270225	0.457975	0.387477	0.342718	0.337211	0.378949	0.362426	0.444502	0.530068	0.35543	0.475383	0.587889	0.628945	0.503703	-0.141277
cg09566995	chr11	1320634	1320635	+	0.003	0.522268	0.74119	0.635528	0.659744	0.652586	0.57993	0.631875	0.710095	0.82761	0.714468	0.833435	0.813576	0.737941	0.772854	-0.14098
cg09576143	chr10	124220367	124220368	+	0.01	0.380705	0.52854	0.497725	0.467454	0.327825	0.394833	0.432847	0.446906	0.58129	0.491238	0.730431	0.624035	0.700189	0.595681	-0.162835
cg09593860	chr11	113929287	113929288	+	0.004	0.732779	0.850227	0.76604	0.815808	0.777602	0.664442	0.767816	0.797239	0.886697	0.885231	0.880404	0.86113	0.916885	0.871264	-0.103448
cg09608716	chr16	88455742	88455743	-	0.037	0.683879	0.972532	0.694655	0.923466	0.736597	0.796917	0.801341	0.749738	0.941812	0.945511	0.978715	0.966206	0.965347	0.924555	-0.123214
cg09608765	chr3	45636137	45636138	+	0	0.487744	0.586263	0.600468	0.480368	0.551891	0.515149	0.53698	0.645725	0.606293	0.601968	0.739105	0.728809	0.632996	0.65915	-0.122169
cg09626521	chr3	113933104	113933105	-	0.02	0.557947	0.873133	0.610276	0.596852	0.513819	0.592871	0.62415	0.756192	0.709442	0.699555	0.796194	0.864023	0.741878	0.761214	-0.137064
cg09664550	chr10	33294358	33294359	+	0.012	0.269875	0.435518	0.324806	0.300764	0.410488	0.333319	0.345795	0.468022	0.483909	0.332004	0.473816	0.506757	0.467004	0.455252	-0.109457
cg09701880	chr2	112252254	112252255	+	0.015	0.528022	0.745483	0.508886	0.67676	0.576157	0.692522	0.621305	0.65263	0.76301	0.643729	0.832601	0.821436	0.761614	0.745837	-0.124532
cg09744759	chr7	5469255	5469256	+	0.005	0.529415	0.634722	0.660565	0.505579	0.592976	0.564348	0.581267	0.62188	0.688027	0.718145	0.684583	0.690729	0.719722	0.687181	-0.105914
cg09745430	chr6	91004452	91004453	-	0.01	0.616947	0.696599	0.682294	0.642221	0.594338	0.635866	0.644711	0.655184	0.767776	0.684923	0.829268	0.794427	0.738887	0.745077	-0.100367
cg09749364	chr15	40384779	40384780	-	0.002	0.485158	0.506867	0.551319	0.504358	0.507801	0.454553	0.501676	0.52144	0.634865	0.549193	0.634097	0.639498	0.653628	0.605453	-0.103777
cg09755594	chr1	85527430	85527431	+	0.044	0.193922	0.389563	0.323887	0.335696	0.464458	0.224065	0.321932	0.401582	0.550039	0.261058	0.43872	0.479216	0.446047	0.429444	-0.107512
cg09824900	chr15	99227735	99227736	+	0.014	0.443344	0.638376	0.573562	0.476111	0.552019	0.477846	0.526876	0.577318	0.651771	0.559972	0.702885	0.745226	0.600656	0.639638	-0.112762
cg09848080	chr19	41642064	41642065	-	0.001	0.405373	0.377407	0.412997	0.465903	0.479012	0.409717	0.425068	0.520922	0.550163	0.506102	0.467728	0.561214	0.572892	0.529837	-0.104769
cg09852389	chr4	4397942	4397943	-	0.011	0.225469	0.379176	0.191511	0.342183	0.391077	0.229801	0.293203	0.476886	0.487884	0.303559	0.322963	0.467271	0.499637	0.426367	-0.133164
cg09859040	chr15	80743325	80743326	+	0.035	0.716872	0.850182	0.680996	0.627005	0.733461	0.69007	0.716431	0.736213	0.791185	0.710511	0.908265	0.88993	0.898911	0.822502	-0.106072
cg09867667	chr10	22605982	22605983	-	0.016	0.369345	0.566732	0.414845	0.400415	0.530618	0.44323	0.454197	0.573004	0.596738	0.435881	0.556454	0.606898	0.573391	0.557061	-0.102864
cg09891125	chr3	62364810	62364811	-	0.011	0.367355	0.538202	0.419007	0.587814	0.497188	0.396608	0.467696	0.520681	0.761673	0.552797	0.51001	0.664189	0.685062	0.615735	-0.14804
cg09904497	chr18	76737834	76737835	-	0.008	0.334237	0.487656	0.360937	0.372487	0.413215	0.391479	0.393335	0.429427	0.462294	0.43395	0.539458	0.575874	0.536829	0.496305	-0.102971
cg09925747	chr10	80514675	80514676	+	0.014	0.564708	0.830598	0.701361	0.657483	0.732808	0.68522	0.695363	0.749352	0.803006	0.770809	0.826699	0.818431	0.818459	0.797793	-0.10243
cg09932747	chr6	31829914	31829915	-	0.049	0.303662	0.588109	0.397416	0.615124	0.455978	0.418871	0.463193	0.475954	0.587783	0.453944	0.646073	0.54563	0.716744	0.571021	-0.107828
cg09956615	chr7	2672989	2672990	-	0.005	0.345248	0.493817	0.421731	0.45133	0.391056	0.34323	0.407735	0.446239	0.572861	0.494355	0.620569	0.534673	0.590127	0.543137	-0.135402
cg09990962	chr1	3164431	3164432	+	0.003	0.605047	0.597893	0.544289	0.601318	0.733447	0.643531	0.620921	0.714364	0.710952	0.732006	0.666225	0.74279	0.78787	0.725701	-0.10478
cg10045446	chr7	32530734	32530735	-	0.02	0.340044	0.435281	0.230072	0.330527	0.317581	0.35443	0.334656	0.484114	0.401586	0.256041	0.575198	0.599189	0.575184	0.481885	-0.14723
cg10078143	chr7	63016835	63016836	-	0.013	0.636483	0.430909	0.434456	0.568443	0.624943	0.538837	0.539012	0.686088	0.59034	0.697295	0.571362	0.812816	0.618627	0.662755	-0.123743
cg10079374	chr7	158750417	158750418	+	0.001	0.599141	0.547848	0.61127	0.452631	0.540613	0.514265	0.544295	0.704053	0.712776	0.638046	0.734929	0.626551	0.879233	0.715931	-0.171637
cg10103906	chr11	125744170	125744171	-	0.049	0.61152	0.871968	0.590805	0.767599	0.82119	0.72009	0.730529	0.809307	0.862215	0.678579	0.925485	0.870926	0.910794	0.842884	-0.112356
cg10120807	chr16	69350190	69350191	+	0.004	0.689193	0.685441	0.611773	0.64026	0.631844	0.633074	0.648598	0.752423	0.638705	0.84473	0.845884	0.772982	0.687819	0.757091	-0.108493
cg10201167	chr6	99273607	99273608	+	0.005	0.440215	0.607151	0.493465	0.499138	0.577635	0.476178	0.51563	0.561542	0.649537	0.571702	0.707221	0.698617	0.666076	0.642449	-0.126819
cg10202461	chr20	61979433	61979434	-	0.012	0.659613	0.865821	0.661034	0.861381	0.868485	0.665538	0.763645	0.856857	0.877547	0.812202	0.936909	0.929554	0.921455	0.889087	-0.125442
cg10224600	chr17	43975063	43975064	+	0.012	0.29589	0.513922	0.418991	0.382308	0.450044	0.44249	0.417274	0.482329	0.548042	0.396777	0.639752	0.648366	0.607607	0.553812	-0.136538
cg10237765	chr17	9863081	9863082	+	0.016	0.494252	0.751244	0.584899	0.66306	0.647209	0.56223	0.617149	0.67295	0.690837	0.735081	0.861149	0.814342	0.685681	0.74334	-0.126191
cg10248100	chr7	872053	872054	+	0.003	0.677301	0.726287	0.713278	0.627133	0.697816	0.617578	0.676565	0.708389	0.821865	0.733205	0.819345	0.823826	0.779829	0.781077	-0.104511
cg10268345	chr16	2140404	2140405	+	0.015	0.643399	0.828882	0.702606	0.717994	0.751368	0.665786	0.718339	0.765559	0.805604	0.755897	0.927469	0.874827	0.881029	0.835064	-0.116725
cg10274108	chr4	38082931	38082932	-	0.025	0.58681	0.828573	0.648387	0.611881	0.689981	0.611597	0.662872	0.703007	0.74735	0.662268	0.855677	0.835575	0.839792	0.773945	-0.111073
cg10285466	chr14	38725710	38725711	+	0.029	0.533801	0.771001	0.498749	0.600374	0.597697	0.682124	0.613958	0.653613	0.660916	0.697907	0.785178	0.726808	0.790844	0.719211	-0.105253
cg10285743	chr15	71184279	71184280	-	0.001	0.0315457	0.0421028	0.0598009	0.0371536	0.0341432	0.0509385	0.0426141	0.309471	0.333086	0.282089	0.321023	0.0694925	0.0640757	0.229873	-0.187259
cg10295858	chr16	411352	411353	-	0.049	0.407517	0.86308	0.425472	0.680919	0.711339	0.478321	0.594441	0.668701	0.771671	0.446548	0.934604	0.912951	0.918632	0.775518	-0.181076
cg10331119	chr1	7209666	7209667	-	0.037	0.662878	0.861832	0.691093	0.576162	0.800356	0.717845	0.718361	0.797754	0.8013	0.680755	0.882092	0.932731	0.918188	0.83547	-0.117109
cg10331424	chr16	70696450	70696451	+	0.005	0.600075	0.744563	0.637407	0.708415	0.764777	0.619964	0.6792	0.790557	0.726931	0.784316	0.87959	0.8639	0.734226	0.796587	-0.117386
cg10331989	chr16	15229931	15229932	+	0.008	0.71206	0.819748	0.696573	0.830624	0.744142	0.724707	0.754642	0.749108	0.914673	0.849379	0.884021	0.869158	0.869995	0.856056	-0.101413
cg10363397	chrY	15864778	15864779	-	0.012	0.301919	0.2282	0.197729	0.283564	0.206327	0.305202	0.253823	0.386086	0.417916	0.188826	0.446621	0.491778	0.507099	0.406388	-0.152564
cg10378032	chr1	65214497	65214498	-	0.011	0.555331	0.74227	0.648936	0.696525	0.804839	0.68947	0.689562	0.745612	0.807894	0.755887	0.833295	0.810577	0.80125	0.792419	-0.102857
cg10450897	chr8	106605031	106605032	+	0.002	0.444053	0.596829	0.624748	0.651042	0.604267	0.674198	0.59919	0.605414	0.761468	0.708056	0.730652	0.813976	0.773955	0.732253	-0.133064
cg10464312	chr2	66672688	66672689	-	0.005	0.521311	0.50724	0.528517	0.546181	0.683235	0.528445	0.552488	0.622448	0.676232	0.650694	0.637081	0.757423	0.744892	0.681462	-0.128973
cg10480249	chr10	3789974	3789975	+	0.033	0.635983	0.931745	0.645456	0.845394	0.839265	0.705133	0.767163	0.853126	0.924422	0.736392	0.912289	0.928094	0.932214	0.881089	-0.113927
cg10501210	chr1	207997020	207997021	+	0.029	0.67592	0.929227	0.757841	0.797327	0.680799	0.656056	0.749528	0.807526	0.924573	0.900489	0.934119	0.855266	0.767822	0.864966	-0.115437
cg10507988	chr2	46593271	46593272	-	0.025	0.712745	0.956516	0.726825	0.761338	0.767706	0.765952	0.781847	0.746048	0.927173	0.911119	0.960583	0.948246	0.967201	0.910062	-0.128215
cg10540110	chr1	202775609	202775610	-	0.003	0.437042	0.571587	0.534326	0.479913	0.535506	0.484875	0.507208	0.59021	0.609465	0.534168	0.651638	0.666037	0.661195	0.618786	-0.111577
cg10556349	chr10	835070	835071	-	0.005	0.515913	0.500966	0.565241	0.443673	0.648049	0.431993	0.517639	0.732398	0.561935	0.62151	0.741869	0.739478	0.673831	0.678504	-0.160864
cg10558233	chr8	94892613	94892614	-	0.01	0.68956	0.677561	0.717792	0.582073	0.787069	0.692045	0.691017	0.81989	0.805244	0.753455	0.810561	0.864961	0.715391	0.794917	-0.1039
cg10565187	chr19	1468943	1468944	+	0.012	0.604037	0.666756	0.679146	0.603487	0.75938	0.648207	0.660169	0.76001	0.716612	0.678718	0.790926	0.83443	0.791177	0.761979	-0.10181
cg10572188	chr3	113213220	113213221	-	0.024	0.567126	0.876224	0.705583	0.77124	0.781056	0.752645	0.742312	0.733508	0.854878	0.845072	0.896888	0.87533	0.855073	0.843458	-0.101146
cg10587989	chrX	70521525	70521526	+	0.004	0.56496	0.768392	0.612058	0.676111	0.68401	0.666529	0.66201	0.763026	0.798526	0.744662	0.771187	0.766678	0.805831	0.774985	-0.112975
cg10593713	chr10	3789788	3789789	+	0.046	0.307568	0.849133	0.409911	0.564779	0.706904	0.447348	0.547607	0.701258	0.746513	0.427532	0.822918	0.860399	0.850968	0.734931	-0.187324
cg10594774	chr10	21152806	21152807	+	0.047	0.939897	0.95835	0.961163	0.374955	0.937331	0.947493	0.853198	0.953434	0.947383	0.972285	0.954668	0.956912	0.952666	0.956225	-0.103027
cg10609256	chr12	34556037	34556038	-	0.005	0.638205	0.663881	0.691178	0.684283	0.765157	0.391477	0.63903	0.731943	0.736439	0.796206	0.718446	0.734218	0.78046	0.749619	-0.110589
cg10626305	chr6	21801442	21801443	+	0.035	0.682575	0.779736	0.662151	0.658691	0.794087	0.630953	0.701366	0.764246	0.741054	0.690996	0.867343	0.872847	0.884504	0.803498	-0.102133
cg10665488	chr11	796569	796570	-	0.02	0.356631	0.293708	0.402329	0.369356	0.300126	0.363406	0.347592	0.276986	0.280183	0.264129	0.234012	0.198992	0.184648	0.239825	0.107768
cg10671380	chr15	80445874	80445875	-	0.036	0.278029	0.374267	0.325674	0.19632	0.280592	0.271494	0.287729	0.516386	0.302198	0.200362	0.357529	0.576188	0.466599	0.40321	-0.115481
cg10683527	chr4	178230606	178230607	-	0.028	0.817157	0.74649	0.813358	0.779244	0.786952	0.783414	0.787769	0.66608	0.720837	0.816712	0.571018	0.646528	0.66484	0.681002	0.106767
cg10714510	chr6	32729465	32729466	+	0.008	0.654362	0.742669	0.750321	0.608732	0.779525	0.786027	0.720273	0.840436	0.797337	0.833625	0.784714	0.784814	0.907609	0.824756	-0.104483
cg10730673	chr17	21455185	21455186	+	0.001	0.399806	0.368259	0.373914	0.3847	0.353526	0.253586	0.355632	0.568983	0.440132	0.507441	0.403033	0.486565	0.407294	0.468908	-0.113276
cg10792923	chr4	103789516	103789517	+	0.024	0.215278	0.339475	0.17418	0.247225	0.373108	0.311812	0.276846	0.342037	0.360067	0.231583	0.483763	0.419182	0.568485	0.400853	-0.124006
cg10805039	chr17	750241	750242	+	0.04	0.492637	0.579824	0.472612	0.400799	0.618653	0.379422	0.490658	0.63172	0.554861	0.435644	0.595724	0.801813	0.800367	0.636688	-0.14603
cg10809783	chr6	148784879	148784880	-	0.003	0.696562	0.827054	0.742904	0.752413	0.75713	0.673241	0.74155	0.784241	0.884189	0.865257	0.836468	0.874684	0.815533	0.843395	-0.101845
cg10941185	chr8	12988516	12988517	-	0.027	0.678977	0.709295	0.600584	0.689057	0.687455	0.690394	0.67596	0.598543	0.765277	0.860455	0.770463	0.849262	0.861901	0.784317	-0.108356
cg10947827	chr2	201980652	201980653	-	0.043	0.319923	0.70046	0.332234	0.498481	0.39365	0.55876	0.467251	0.437792	0.594574	0.561945	0.634045	0.665191	0.707696	0.600207	-0.132956
cg10973622	chr2	86423274	86423275	-	0.011	0.59247	0.516049	0.45644	0.396724	0.540492	0.348565	0.475123	0.668799	0.731779	0.577267	0.509858	0.593764	0.770631	0.642016	-0.166893
cg10997479	chr3	62362924	62362925	+	0.047	0.317954	0.630198	0.360606	0.530341	0.447132	0.47421	0.460073	0.516119	0.588508	0.393037	0.615655	0.613009	0.658807	0.564189	-0.104116
cg11053489	chr14	74484925	74484926	+	0.004	0.512593	0.650269	0.589885	0.548723	0.566196	0.615796	0.580577	0.610216	0.744466	0.644198	0.673712	0.770852	0.71941	0.693809	-0.113232
cg11099722	chr15	101442813	101442814	-	0.041	0.222569	0.503931	0.251169	0.361293	0.524706	0.391647	0.375886	0.581003	0.420229	0.30853	0.522351	0.644437	0.603889	0.513406	-0.137521
cg11122009	chr17	63554536	63554537	-	0.047	0.287452	0.577583	0.433045	0.365248	0.500351	0.40676	0.428407	0.499731	0.440754	0.358792	0.621366	0.718417	0.737509	0.562761	-0.134355
cg11134430	chr3	193987426	193987427	-	0.04	0.52281	0.630174	0.597197	0.484935	0.679517	0.503937	0.569762	0.682113	0.617669	0.526852	0.704617	0.80316	0.7287	0.677185	-0.107423
cg11195797	chr13	100547331	100547332	-	0.031	0.567116	0.671022	0.558191	0.49195	0.413832	0.587526	0.548273	0.486481	0.642973	0.703973	0.629063	0.761307	0.727878	0.658613	-0.11034
cg11198589	chr1	33721369	33721370	-	0.018	0.252058	0.437837	0.282267	0.230457	0.288548	0.247617	0.289797	0.314215	0.35547	0.362262	0.4941	0.455123	0.438947	0.403353	-0.113556
cg11318087	chr17	80336356	80336357	+	0.018	0.688456	0.832169	0.697871	0.77922	0.726853	0.741797	0.744394	0.856651	0.762784	0.729083	0.914519	0.902878	0.908847	0.845794	-0.101399
cg11320144	chr20	1975276	1975277	-	0.029	0.460113	0.544125	0.512938	0.471596	0.553552	0.403464	0.490965	0.561536	0.482625	0.510345	0.578168	0.733748	0.688341	0.59246	-0.101496
cg11380108	chr2	75835911	75835912	+	0.02	0.475725	0.615707	0.519135	0.534159	0.651929	0.478695	0.545892	0.672036	0.615854	0.513834	0.723348	0.702004	0.702473	0.654925	-0.109033
cg11383544	chr1	114355622	114355623	-	0.036	0.478536	0.856697	0.599803	0.759567	0.77455	0.630266	0.683237	0.741875	0.804181	0.701958	0.848247	0.861825	0.871875	0.804993	-0.121757
cg11442173	chr17	61515312	61515313	+	0.045	0.427457	0.559679	0.558641	0.558722	0.480269	0.461592	0.507727	0.401549	0.582506	0.674406	0.688993	0.834762	0.568755	0.625162	-0.117435
cg11466449	chr8	135842613	135842614	-	0.005	0.618778	0.712401	0.646571	0.637203	0.67336	0.54359	0.63865	0.671183	0.732703	0.729243	0.793348	0.806502	0.757997	0.748496	-0.109846
cg11491247	chr1	155035530	155035531	-	0.001	0.518552	0.48166	0.485588	0.445533	0.554301	0.507076	0.498785	0.629052	0.595282	0.563715	0.634617	0.646174	0.616396	0.614206	-0.115421
cg11498228	chr8	1895431	1895432	+	0.03	0.570552	0.805085	0.604324	0.595646	0.652197	0.577677	0.634247	0.697256	0.667596	0.672738	0.806712	0.852189	0.761505	0.742999	-0.108752
cg11556559	chr17	17465162	17465163	+	0.016	0.571777	0.845581	0.641435	0.710208	0.714339	0.625179	0.684753	0.739347	0.750794	0.7613	0.849572	0.869107	0.84871	0.803138	-0.118385
cg11574055	chr1	117077116	117077117	-	0.005	0.649805	0.600693	0.596986	0.544288	0.671496	0.548831	0.602017	0.80869	0.667974	0.660611	0.656187	0.762355	0.85747	0.735548	-0.133531
cg11612799	chr3	113933175	113933176	-	0.047	0.419806	0.882112	0.454108	0.619708	0.619182	0.629133	0.604008	0.746618	0.691167	0.591126	0.820354	0.891294	0.749824	0.748397	-0.144389
cg11617144	chr8	145729772	145729773	-	0.001	0.782787	0.906583	0.83535	0.777868	0.813794	0.719851	0.806039	0.888053	0.920269	0.91575	0.934788	0.943628	0.874433	0.91282	-0.106781
cg11625933	chr3	81811322	81811323	-	0.009	0.563248	0.682818	0.62942	0.57324	0.599384	0.551907	0.600003	0.635739	0.754053	0.672915	0.720621	0.733831	0.70513	0.703715	-0.103712
cg11630226	chr8	143781816	143781817	-	0.044	0.444056	0.419092	0.320007	0.422165	0.506094	0.458928	0.428391	0.400091	0.496128	0.660575	0.664187	0.467535	0.503279	0.531966	-0.103575
cg11641102	chr8	27183873	27183874	-	0.014	0.432988	0.630061	0.568501	0.495212	0.586199	0.496979	0.53499	0.62409	0.601098	0.543299	0.761235	0.736034	0.664158	0.654986	-0.119996
cg11671363	chr5	148810177	148810178	+	0.038	0.614029	0.883567	0.649902	0.772346	0.682087	0.745664	0.724599	0.697483	0.835982	0.884439	0.862938	0.81979	0.876854	0.829581	-0.104982
cg11692124	chr17	79316097	79316098	+	0.009	0.413626	0.719791	0.546018	0.617407	0.63387	0.563711	0.582404	0.657078	0.664538	0.667794	0.819227	0.803101	0.762409	0.729025	-0.146621
cg11704818	chr3	47517781	47517782	-	0.021	0.462752	0.705138	0.480074	0.63223	0.601734	0.637833	0.586627	0.600679	0.696392	0.694028	0.761742	0.672806	0.716287	0.690322	-0.103695
cg11737298	chr11	132217395	132217396	+	0.011	0.502192	0.692498	0.550515	0.416701	0.62251	0.547049	0.555244	0.719663	0.725173	0.653181	0.592381	0.788188	0.633834	0.685403	-0.130159
cg11779808	chr8	2586225	2586226	-	0.044	0.779405	0.782767	0.477627	0.659407	0.608741	0.683041	0.665165	0.716124	0.733065	0.712031	0.889809	0.798732	0.773935	0.770616	-0.105451
cg11781421	chr19	19367084	19367085	+	0.033	0.692634	0.721823	0.7179	0.697957	0.723397	0.728773	0.713747	0.649206	0.634252	0.708128	0.509141	0.518038	0.655469	0.612372	0.101375
cg11834066	chrX	145701413	145701414	-	0.018	0.843964	0.877922	0.69893	0.750016	0.614971	0.668727	0.742422	0.834437	0.857172	0.845222	0.798752	0.963528	0.908884	0.867999	-0.125578
cg11864326	chr17	942320	942321	-	0.028	0.636807	0.932338	0.63594	0.82956	0.78137	0.76864	0.764109	0.752134	0.878743	0.873591	0.936186	0.946223	0.928195	0.885845	-0.121736
cg11867491	chr7	41982375	41982376	-	0.028	0.581983	0.805845	0.564535	0.620506	0.558914	0.612221	0.624001	0.582428	0.750086	0.661572	0.83089	0.809933	0.817388	0.742049	-0.118049
cg11909912	chr17	43974919	43974920	-	0.01	0.269356	0.431998	0.33339	0.352789	0.363149	0.36029	0.351829	0.39578	0.483624	0.357528	0.509749	0.492905	0.557251	0.466139	-0.114311
cg11945929	chr7	158750384	158750385	+	0.009	0.526638	0.418551	0.525762	0.484504	0.426322	0.412842	0.46577	0.613333	0.576563	0.480999	0.603558	0.515854	0.727027	0.586222	-0.120453
cg11948874	chr20	36147327	36147328	-	0	0.756436	0.789107	0.749482	0.727601	0.770512	0.709479	0.750436	0.803208	0.839644	0.834017	0.891048	0.900705	0.880388	0.858168	-0.107732
cg12082609	chr2	66671727	66671728	-	0.001	0.603295	0.668701	0.684475	0.658117	0.736421	0.656953	0.667994	0.725785	0.822424	0.760105	0.829882	0.847384	0.847294	0.805479	-0.137485
cg12083217	chr18	56935013	56935014	-	0.034	0.197471	0.58918	0.374843	0.573442	0.603647	0.367577	0.451027	0.653922	0.690893	0.394368	0.541826	0.644945	0.648537	0.595748	-0.144722
cg12090740	chr18	60988058	60988059	-	0.003	0.433321	0.511046	0.495038	0.444071	0.555959	0.58258	0.503669	0.645569	0.604314	0.644326	0.541112	0.72651	0.667622	0.638242	-0.134573
cg12149795	chr21	47882121	47882122	-	0.004	0.436332	0.483361	0.515034	0.454974	0.557504	0.405858	0.47551	0.576148	0.6149	0.503657	0.695484	0.595533	0.519706	0.584238	-0.108728
cg12152338	chr11	36119923	36119924	+	0.02	0.589344	0.694791	0.661814	0.644232	0.71673	0.530214	0.639521	0.71733	0.751079	0.716773	0.795104	0.836248	0.627021	0.740592	-0.101072
cg12158488	chr8	31336998	31336999	+	0.008	0.572521	0.651399	0.615617	0.607333	0.732387	0.588441	0.62795	0.773701	0.693159	0.694689	0.754407	0.747293	0.751603	0.735809	-0.107859
cg12170191	chr8	142069560	142069561	-	0.002	0.518341	0.594358	0.622424	0.584519	0.568351	0.608737	0.582788	0.612564	0.660954	0.624305	0.622286	0.796361	0.817351	0.68897	-0.106182
cg12178287	chr19	17631836	17631837	+	0.025	0.766182	0.974388	0.744234	0.883005	0.867474	0.771435	0.834453	0.872374	0.949882	0.878252	0.971401	0.962799	0.979931	0.935773	-0.10132
cg12193327	chr2	31454631	31454632	+	0.008	0.698347	0.494743	0.601752	0.519117	0.738386	0.592597	0.60749	0.739646	0.725449	0.705373	0.897985	0.733359	0.839795	0.773601	-0.166111
cg12229775	chr13	74315385	74315386	+	0.031	0.420561	0.634573	0.477593	0.545231	0.513269	0.513208	0.517406	0.567485	0.590379	0.455055	0.674545	0.702547	0.718624	0.618106	-0.1007
cg12236129	chr18	76734785	76734786	+	0.014	0.145403	0.429318	0.130121	0.19701	0.280078	0.392304	0.262372	0.244576	0.337748	0.431371	0.55762	0.586235	0.569211	0.45446	-0.192088
cg12290311	chr5	39424119	39424120	+	0.009	0.515056	0.721864	0.571582	0.611285	0.73405	0.606725	0.62676	0.742739	0.753081	0.623617	0.804857	0.835743	0.765781	0.754303	-0.127543
cg12298745	chr18	76737545	76737546	+	0.012	0.466611	0.704394	0.498389	0.538461	0.683832	0.616924	0.584769	0.706459	0.65718	0.633359	0.768479	0.868713	0.842195	0.746064	-0.161295
cg12319534	chr4	54959841	54959842	+	0.003	0.591103	0.689359	0.647624	0.59291	0.723866	0.646436	0.64855	0.797701	0.792547	0.701368	0.843858	0.787965	0.709745	0.772197	-0.123648
cg12343363	chr13	103346811	103346812	+	0.036	0.706823	0.739636	0.65741	0.543231	0.81664	0.559747	0.670581	0.674061	0.827069	0.750844	0.89201	0.80113	0.786733	0.788641	-0.11806
cg12352622	chr5	69803286	69803287	+	0.025	0.790467	0.748635	0.769715	0.655165	0.857853	0.687295	0.751522	0.88521	0.74472	0.782416	0.892624	0.949277	0.949603	0.867308	-0.115787
cg12564102	chr2	108086048	108086049	+	0.034	0.612979	0.660215	0.691082	0.620957	0.974639	0.97244	0.755385	0.983516	0.679519	0.977825	0.974044	0.976168	0.97585	0.92782	-0.172435
cg12581741	chr10	1559249	1559250	-	0.027	0.401254	0.402246	0.443227	0.372131	0.368325	0.447044	0.405705	0.276053	0.293279	0.292276	0.233551	0.253634	0.385017	0.288968	0.116736
cg12584960	chr13	114965839	114965840	+	0.02	0.554819	0.64689	0.503985	0.419612	0.725202	0.565163	0.569279	0.697617	0.669872	0.69252	0.658589	0.759453	0.645416	0.687245	-0.117966
cg12614667	chr1	89663868	89663869	-	0.02	0.323936	0.460647	0.23013	0.244693	0.32831	0.28781	0.312588	0.484683	0.574121	0.226989	0.393788	0.563995	0.533037	0.462769	-0.150181
cg12618270	chr8	8667411	8667412	-	0.002	0.571371	0.678445	0.614767	0.641761	0.677478	0.551501	0.622554	0.689494	0.728028	0.665974	0.759361	0.785703	0.756742	0.730883	-0.10833
cg12623982	chr10	119295400	119295401	-	0.037	0.491737	0.812498	0.60024	0.610773	0.758154	0.646422	0.653304	0.785887	0.621374	0.730982	0.777572	0.876389	0.880974	0.778863	-0.125559
cg12627354	chr11	46940434	46940435	+	0.02	0.280767	0.528243	0.355828	0.381963	0.330793	0.408643	0.381039	0.436482	0.478049	0.336991	0.565855	0.647725	0.630035	0.515856	-0.134817
cg12646804	chr5	2008188	2008189	-	0.008	0.514516	0.612109	0.580219	0.529827	0.546429	0.49203	0.545855	0.680415	0.589699	0.525178	0.704205	0.749625	0.704406	0.658921	-0.113066
cg12672189	chr6	32427868	32427869	-	0.049	0.698053	0.51408	0.575791	0.612785	0.656164	0.697172	0.625674	0.823271	0.684113	0.551356	0.683846	0.814229	0.927019	0.747306	-0.121632
cg12709009	chr6	170557582	170557583	-	0.01	0.488347	0.666299	0.595409	0.518214	0.509318	0.533033	0.55177	0.573697	0.610083	0.658105	0.667084	0.768194	0.759565	0.672788	-0.121018
cg12732998	chr3	147131860	147131861	+	0.035	0.484912	0.706769	0.484143	0.534758	0.576376	0.551368	0.556388	0.54336	0.676663	0.582305	0.774357	0.628937	0.768375	0.662333	-0.105945
cg12744031	chr7	158751184	158751185	+	0.045	0.127125	0.0922582	0.183965	0.104275	0.13075	0.123086	0.12691	0.220549	0.411292	0.0827917	0.529399	0.109488	0.766436	0.353326	-0.226416
cg12756504	chr15	37396672	37396673	-	0.009	0.498833	0.543209	0.480068	0.655951	0.510716	0.486456	0.529206	0.573713	0.85301	0.53938	0.728681	0.685515	0.646903	0.6712	-0.141995
cg12765123	chr10	132100019	132100020	+	0.006	0.508301	0.703252	0.542431	0.707017	0.504242	0.601575	0.59447	0.739854	0.815813	0.616464	0.82612	0.858454	0.690851	0.757926	-0.163456
cg12768605	chr19	44324951	44324952	-	0.001	0.28517	0.224448	0.180035	0.25284	0.279048	0.256201	0.24629	0.350618	0.283056	0.331877	0.367851	0.365062	0.423667	0.353688	-0.107398
cg12793733	chr4	47488620	47488621	-	0.001	0.477026	0.701424	0.724908	0.650855	0.684643	0.633295	0.645359	0.708309	0.784087	0.768261	0.816412	0.754819	0.740694	0.762097	-0.116738
cg12797594	chr22	36236395	36236396	-	0.004	0.203373	0.187327	0.253978	0.214294	0.164125	0.262466	0.21426	0.237607	0.290966	0.254495	0.417974	0.294934	0.399403	0.315896	-0.101636
cg12865888	chr8	141220177	141220178	-	0.047	0.368431	0.757926	0.563292	0.631732	0.773687	0.541647	0.606119	0.805094	0.697341	0.455655	0.834695	0.929435	0.920363	0.773764	-0.167645
cg12877020	chr2	239996263	239996264	-	0.043	0.592443	0.838998	0.691196	0.752982	0.806524	0.681297	0.72724	0.849274	0.722325	0.700845	0.886827	0.94474	0.911428	0.835907	-0.108667
cg12937151	chr15	87758226	87758227	+	0.042	0.28911	0.646714	0.401576	0.464424	0.557541	0.520789	0.480026	0.538533	0.545629	0.427228	0.687275	0.732672	0.718367	0.608284	-0.128259
cg12954512	chr7	158750244	158750245	-	0.016	0.788196	0.66977	0.814385	0.701492	0.695206	0.739127	0.734696	0.869849	0.783267	0.745834	0.894329	0.796811	0.92329	0.835563	-0.100867
cg13015284	chr11	64410392	64410393	+	0.001	0.457751	0.537993	0.449853	0.48304	0.515659	0.481476	0.487629	0.530741	0.57303	0.583162	0.625498	0.619899	0.613346	0.590946	-0.103317
cg13022905	chr5	147699892	147699893	-	0.048	0.887882	0.632094	0.627279	0.87734	0.778397	0.728606	0.755266	0.878827	0.897165	0.798848	0.827762	0.826586	0.941073	0.86171	-0.106444
cg13033070	chr5	3188312	3188313	-	0.028	0.535196	0.830068	0.521452	0.884333	0.766642	0.597015	0.689118	0.852489	0.922359	0.666986	0.875243	0.917413	0.836996	0.845248	-0.15613
cg13045351	chr6	28092048	28092049	+	0.011	0.351881	0.218834	0.343952	0.288456	0.321245	0.148855	0.27887	0.434151	0.475697	0.285917	0.367733	0.587586	0.365068	0.419359	-0.140488
cg13070366	chr11	9386451	9386452	-	0.001	0.7221	0.542412	0.619061	0.606079	0.66903	0.651202	0.634981	0.7651	0.731566	0.724299	0.798837	0.80378	0.856794	0.780063	-0.145082
cg13071185	chr11	860134	860135	-	0.011	0.557318	0.649583	0.499778	0.562932	0.730614	0.46337	0.577266	0.745989	0.772632	0.647155	0.68853	0.812806	0.72559	0.732117	-0.154851
cg13081620	chrX	53118080	53118081	-	0.007	0.188854	0.200744	0.18149	0.222727	0.20664	0.218072	0.203088	0.195222	0.380199	0.2189	0.458152	0.282948	0.331903	0.311221	-0.108133
cg13111532	chr1	1886543	1886544	-	0	0.792878	0.843184	0.739903	0.874058	0.845562	0.804841	0.816738	0.858469	0.935509	0.920849	0.923795	0.9273	0.941574	0.917916	-0.101178
cg13113525	chr15	74427234	74427235	+	0.045	0.715573	0.674791	0.804581	0.673303	0.657754	0.730511	0.709419	0.644534	0.607116	0.683524	0.426025	0.529855	0.595679	0.581122	0.128297
cg13204568	chr1	12679255	12679256	+	0.006	0.443883	0.579643	0.47723	0.49753	0.481304	0.478636	0.493038	0.532987	0.596662	0.539731	0.644288	0.605397	0.644372	0.593906	-0.100868
cg13247580	chr14	69263103	69263104	-	0.003	0.49353	0.625683	0.555239	0.499529	0.611836	0.507824	0.54894	0.673706	0.615591	0.600469	0.701966	0.680465	0.656927	0.654854	-0.105914
cg13266018	chr7	5637739	5637740	+	0	0.676822	0.694137	0.684642	0.669341	0.635809	0.718421	0.679862	0.728485	0.793304	0.792705	0.798745	0.773477	0.828446	0.78586	-0.105998
cg13333954	chr12	1098663	1098664	+	0.017	0.499416	0.716481	0.401098	0.593918	0.637056	0.582829	0.5718	0.5958	0.720446	0.66827	0.730064	0.752696	0.725821	0.698849	-0.12705
cg13390284	chr1	65531864	65531865	-	0.013	0.252213	0.400337	0.263559	0.356824	0.395646	0.213523	0.313684	0.402472	0.450715	0.324987	0.487679	0.456696	0.375702	0.416375	-0.102691
cg13409439	chr9	135040296	135040297	-	0.004	0.498635	0.486893	0.441804	0.436061	0.56183	0.423992	0.474869	0.6684	0.66786	0.525337	0.630978	0.616156	0.531443	0.606696	-0.131827
cg13425888	chr19	55476669	55476670	+	0.007	0.903197	0.899908	0.797877	0.501661	0.893977	0.819713	0.802722	0.945947	0.870938	0.935218	0.936164	0.91558	0.923824	0.921279	-0.118556
cg13439315	chr4	7197511	7197512	-	0.002	0.288031	0.473283	0.362715	0.484009	0.373307	0.318578	0.383321	0.410295	0.436916	0.595233	0.633635	0.576414	0.488195	0.523448	-0.140127
cg13460556	chr15	89709638	89709639	+	0.01	0.658465	0.837638	0.680612	0.618845	0.768391	0.702397	0.711058	0.792049	0.823302	0.709565	0.871898	0.879416	0.8797	0.825988	-0.11493
cg13474918	chr7	119914578	119914579	+	0.03	0.606712	0.874854	0.638057	0.76177	0.708329	0.692145	0.713644	0.762948	0.779827	0.747111	0.832017	0.911379	0.903347	0.822772	-0.109127
cg13558371	chr9	126135610	126135611	-	0.014	0.501581	0.607687	0.483949	0.443362	0.541309	0.482202	0.510015	0.59733	0.524895	0.529122	0.657271	0.707758	0.66294	0.613219	-0.103204
cg13559439	chr8	12989237	12989238	+	0.004	0.584844	0.45653	0.490687	0.550733	0.564298	0.508971	0.526011	0.556618	0.587397	0.671075	0.627566	0.706207	0.627631	0.629416	-0.103405
cg13606990	chr18	32848016	32848017	-	0.013	0.624194	0.793305	0.584158	0.666264	0.704218	0.607134	0.663212	0.79192	0.694791	0.70872	0.78941	0.817712	0.860832	0.777231	-0.114018
cg13644262	chr4	6449564	6449565	-	0.039	0.617173	0.835828	0.619174	0.685454	0.649691	0.670378	0.679616	0.631124	0.77774	0.698102	0.861676	0.863384	0.881726	0.785625	-0.106009
cg13652795	chrX	40000784	40000785	-	0.01	0.619464	0.747524	0.685137	0.678701	0.765872	0.654424	0.691854	0.795213	0.803602	0.69397	0.867994	0.849415	0.759268	0.79491	-0.103057
cg13655250	chr9	134544528	134544529	+	0.001	0.501494	0.633261	0.636232	0.561854	0.601455	0.53446	0.578126	0.669194	0.641766	0.646115	0.752809	0.739379	0.652209	0.683579	-0.105453
cg13689073	chr5	154093260	154093261	+	0.002	0.716185	0.769745	0.732918	0.682881	0.811883	0.639104	0.725453	0.800897	0.821487	0.804049	0.86409	0.848468	0.817452	0.826074	-0.100621
cg13755204	chr9	136844768	136844769	+	0.012	0.697156	0.859887	0.712399	0.74637	0.794955	0.703311	0.752346	0.798198	0.820319	0.864051	0.931927	0.869994	0.853343	0.856305	-0.103959
cg13782932	chr11	118662891	118662892	+	0.014	0.155095	0.278471	0.134843	0.143988	0.199551	0.262851	0.1958	0.306772	0.381907	0.228057	0.327332	0.25034	0.285521	0.296655	-0.100855
cg13802506	chr9	95888884	95888885	-	0.003	0.772056	0.924277	0.840561	0.867823	0.814808	0.730079	0.824934	0.942731	0.931854	0.9048	0.918198	0.950438	0.941546	0.931595	-0.106661
cg13818127	chr7	4169630	4169631	+	0.042	0.772975	0.706985	0.874252	0.716898	0.95414	0.702426	0.787946	0.891041	0.871457	0.80737	0.932193	0.974155	0.896291	0.895418	-0.107472
cg13847070	chr5	137071523	137071524	+	0.012	0.224511	0.300554	0.38317	0.23481	0.252482	0.229354	0.270814	0.30061	0.432934	0.33622	0.413603	0.40655	0.368247	0.376361	-0.105547
cg13852093	chr18	74770815	74770816	-	0.037	0.565136	0.606641	0.571589	0.581057	0.631264	0.48416	0.573308	0.587541	0.67334	0.524286	0.798718	0.718391	0.755277	0.676259	-0.102951
cg13867255	chr9	138108675	138108676	-	0.041	0.604441	0.771458	0.734539	0.651112	0.738826	0.517339	0.669619	0.663297	0.746738	0.881047	0.809342	0.825425	0.742213	0.778011	-0.108391
cg13868361	chr1	89357908	89357909	-	0.003	0.586129	0.602764	0.419159	0.626627	0.685166	0.574887	0.582455	0.618336	0.762618	0.702592	0.688401	0.699793	0.770024	0.706961	-0.124506
cg13893782	chr6	136358918	136358919	+	0.009	0.392155	0.646469	0.534617	0.483944	0.561397	0.52405	0.523772	0.561434	0.655212	0.545695	0.7203	0.731172	0.699173	0.652164	-0.128392
cg13897388	chr9	77282233	77282234	-	0.005	0.919395	0.949161	0.939805	0.383883	0.915765	0.929984	0.839665	0.943216	0.95141	0.955035	0.94306	0.958883	0.953842	0.950907	-0.111242
cg13911501	chr8	141220320	141220321	+	0.035	0.482469	0.691068	0.606604	0.577247	0.712955	0.482663	0.592167	0.741393	0.684974	0.527045	0.70522	0.823533	0.775443	0.709601	-0.117434
cg13941830	chr1	50891341	50891342	+	0.048	0.302567	0.425636	0.298114	0.303779	0.376511	0.294326	0.333489	0.396336	0.37851	0.279219	0.409797	0.668868	0.553395	0.447687	-0.114199
cg13987606	chr1	160002698	160002699	-	0.028	0.33048	0.575105	0.328455	0.512838	0.462397	0.331413	0.423448	0.463295	0.566135	0.415989	0.588404	0.594333	0.566093	0.532375	-0.108927
cg13995854	chr7	116764970	116764971	+	0.014	0.41333	0.401287	0.488824	0.424213	0.558373	0.389995	0.446004	0.581071	0.633606	0.479293	0.603664	0.576586	0.485598	0.55997	-0.113966
cg14018215	chr9	140173347	140173348	+	0.007	0.525707	0.647571	0.579854	0.575798	0.652204	0.469722	0.575143	0.636816	0.645546	0.723815	0.732246	0.685151	0.793945	0.70292	-0.127777
cg14023573	chr8	140971379	140971380	-	0.018	0.739092	0.883605	0.740119	0.722809	0.72891	0.807077	0.770269	0.73079	0.908135	0.862177	0.915476	0.924929	0.901597	0.873851	-0.103582
cg14025637	chr8	143208025	143208026	-	0.018	0.670319	0.787114	0.634458	0.781966	0.803065	0.697979	0.72915	0.914403	0.680314	0.822066	0.807359	0.911136	0.84935	0.830771	-0.101621
cg14046477	chr9	127531952	127531953	-	0.02	0.402721	0.66402	0.452074	0.550862	0.438028	0.508268	0.502662	0.471649	0.659388	0.564439	0.700869	0.652949	0.686298	0.622598	-0.119936
cg14058476	chr14	24835609	24835610	-	0.017	0.588159	0.637921	0.56391	0.507968	0.571599	0.558246	0.571301	0.602688	0.712689	0.540794	0.778435	0.695595	0.770103	0.683384	-0.112083
cg14071579	chr9	126794830	126794831	+	0.017	0.292089	0.503675	0.423788	0.581456	0.544545	0.374497	0.453342	0.694641	0.702063	0.328184	0.642169	0.698505	0.738285	0.633974	-0.180633
cg14093255	chr9	14081508	14081509	-	0.005	0.422521	0.560391	0.665765	0.541179	0.457062	0.59002	0.53949	0.645473	0.640576	0.611034	0.630808	0.656313	0.66752	0.641954	-0.102464
cg14131038	chr2	106360709	106360710	-	0.005	0.436919	0.569744	0.492064	0.445014	0.49495	0.456982	0.482612	0.562442	0.643667	0.552343	0.629911	0.541002	0.662912	0.598713	-0.116101
cg14137625	chr9	136776390	136776391	+	0	0.729307	0.901901	0.824106	0.817513	0.917191	0.833089	0.837184	0.926354	0.925783	0.924268	0.959611	0.948125	0.959739	0.940647	-0.103462
cg14156441	chr8	126447096	126447097	+	0.009	0.470226	0.682818	0.52448	0.564611	0.560029	0.584251	0.564402	0.575813	0.65831	0.680182	0.765812	0.723104	0.734321	0.68959	-0.125188
cg14179581	chr1	50881502	50881503	+	0.046	0.180331	0.367361	0.182655	0.393593	0.259781	0.208791	0.265419	0.315742	0.315686	0.2129	0.350056	0.525446	0.575741	0.382595	-0.117177
cg14185541	chr13	95366203	95366204	-	0.021	0.744818	0.570914	0.751751	0.598562	0.751528	0.739256	0.692805	0.595046	0.542508	0.570888	0.460835	0.496355	0.495148	0.526797	0.166008
cg14192029	chr4	126058	126059	+	0.019	0.886049	0.704271	0.717713	0.695367	0.716051	0.711719	0.738528	0.725068	0.767696	0.946427	0.920205	0.875847	0.93448	0.861621	-0.123092
cg14207539	chr10	77794591	77794592	+	0.026	0.625296	0.813385	0.638892	0.770929	0.784471	0.672466	0.717573	0.72681	0.835174	0.728865	0.871113	0.854058	0.902535	0.819759	-0.102186
cg14254745	chr1	26758306	26758307	-	0.038	0.216255	0.409485	0.260235	0.29746	0.285782	0.324394	0.298935	0.257485	0.378125	0.297831	0.462809	0.527873	0.604641	0.42146	-0.122525
cg14262681	chr20	21084420	21084421	+	0.034	0.143645	0.288634	0.119915	0.314789	0.15487	0.311057	0.222152	0.191915	0.343404	0.229675	0.633204	0.342881	0.379773	0.353475	-0.131324
cg14294859	chr9	130862556	130862557	-	0.005	0.373589	0.629661	0.48573	0.559888	0.525248	0.424214	0.499722	0.546377	0.618478	0.593703	0.79804	0.821551	0.665066	0.673869	-0.174147
cg14302973	chr8	10283221	10283222	-	0.006	0.751417	0.822199	0.718392	0.772614	0.725004	0.772439	0.760344	0.72661	0.855891	0.861523	0.921142	0.915346	0.902118	0.863771	-0.103427
cg14324502	chr9	88898587	88898588	-	0.006	0.711501	0.865927	0.73112	0.770107	0.74513	0.680479	0.750711	0.820121	0.861258	0.833454	0.84938	0.89007	0.870324	0.854101	-0.10339
cg14381313	chr16	88268339	88268340	-	0.007	0.692179	0.609678	0.605026	0.754602	0.845061	0.77523	0.713629	0.847594	0.74804	0.861315	0.883945	0.886241	0.882062	0.851533	-0.137904
cg14391148	chr9	140175219	140175220	+	0.014	0.491466	0.88762	0.517599	0.667337	0.867076	0.605827	0.672821	0.836031	0.708771	0.926232	0.932639	0.915375	0.92554	0.874098	-0.201277
cg14397171	chr15	101728653	101728654	-	0.007	0.704392	0.66267	0.75482	0.649037	0.80215	0.665126	0.706366	0.819254	0.826771	0.835488	0.891046	0.832443	0.751958	0.82616	-0.119794
cg14449958	chr14	37075527	37075528	-	0.008	0.635618	0.807355	0.727178	0.652154	0.688094	0.69668	0.70118	0.732629	0.857201	0.815065	0.824786	0.819038	0.7585	0.801203	-0.100023
cg14467281	chr9	33044611	33044612	+	0.017	0.142937	0.272996	0.212816	0.272263	0.165583	0.229534	0.216022	0.266342	0.351757	0.211648	0.496343	0.313979	0.284528	0.320766	-0.104745
cg14498592	chr20	62092502	62092503	+	0.025	0.631552	0.341834	0.273473	0.486155	0.441615	0.37362	0.424708	0.393866	0.543273	0.578806	0.568321	0.643226	0.761128	0.581437	-0.156728
cg14511376	chr9	35607900	35607901	-	0.048	0.964974	0.665007	0.961357	0.357435	0.964386	0.95058	0.810623	0.9582	0.965896	0.969555	0.958444	0.967052	0.95736	0.962751	-0.152128
cg14523979	chr14	35838413	35838414	-	0.023	0.598561	0.80153	0.639038	0.538974	0.686725	0.615337	0.646694	0.715679	0.709214	0.635125	0.789709	0.925566	0.904875	0.780028	-0.133334
cg14526021	chr7	101512931	101512932	+	0.016	0.672416	0.83908	0.649135	0.636321	0.686297	0.681343	0.694099	0.714078	0.791154	0.757456	0.893207	0.862721	0.85496	0.812263	-0.118164
cg14562054	chr11	66104485	66104486	+	0.001	0.645606	0.630228	0.488334	0.590628	0.674765	0.592898	0.603743	0.68356	0.739433	0.672566	0.737296	0.744688	0.68963	0.711196	-0.107452
cg14562786	chr9	40698808	40698809	+	0.036	0.772536	0.514623	0.927565	0.604304	0.614522	0.603004	0.672759	0.634576	0.935369	0.945948	0.731275	0.797437	0.932466	0.829512	-0.156753
cg14573411	chr9	126135992	126135993	+	0.05	0.331045	0.590665	0.290756	0.372215	0.41871	0.432093	0.405914	0.514376	0.483188	0.286811	0.67204	0.699058	0.646206	0.55028	-0.144366
cg14576824	chr1	213224402	213224403	-	0.009	0.473822	0.557203	0.375679	0.426184	0.511631	0.403024	0.457924	0.509935	0.550591	0.543748	0.561123	0.590651	0.67068	0.571121	-0.113197
cg14580628	chr5	43602116	43602117	-	0.008	0.287917	0.495217	0.427844	0.376776	0.539326	0.444474	0.428592	0.530653	0.542582	0.457531	0.588408	0.531614	0.573013	0.5373	-0.108708
cg14608020	chr9	126782556	126782557	-	0.01	0.46776	0.688647	0.539196	0.596818	0.678081	0.565683	0.589364	0.715569	0.748159	0.610991	0.71402	0.727473	0.699105	0.702553	-0.113188
cg14621701	chr20	61508590	61508591	+	0	0.630209	0.705231	0.697437	0.631591	0.734096	0.62224	0.670134	0.738496	0.786004	0.767962	0.70763	0.830462	0.796145	0.771116	-0.100982
cg14659346	chr2	233246431	233246432	+	0.02	0.0769916	0.119449	0.286204	0.0600981	0.196091	0.0749601	0.135632	0.504077	0.299647	0.0451279	0.227126	0.484242	0.339144	0.316561	-0.180928
cg14659930	chr3	114128301	114128302	+	0.003	0.305277	0.44124	0.397385	0.511455	0.483442	0.400618	0.423236	0.49477	0.562576	0.468525	0.599744	0.587149	0.51642	0.538197	-0.114961
cg14677909	chr10	48807341	48807342	-	0.026	0.929049	0.930051	0.389391	0.915699	0.36635	0.9071	0.739607	0.93928	0.940334	0.953616	0.941446	0.913994	0.908981	0.932942	-0.193335
cg14689515	chr3	39190648	39190649	+	0.002	0.58619	0.621435	0.703911	0.563464	0.63233	0.653897	0.626871	0.748137	0.684155	0.720669	0.79653	0.802192	0.730631	0.747052	-0.120181
cg14716968	chr11	84635906	84635907	-	0.024	0.515457	0.729445	0.517079	0.661447	0.612646	0.6526	0.614779	0.588599	0.717483	0.720902	0.731605	0.794874	0.767043	0.720084	-0.105305
cg14741143	chr3	156273315	156273316	+	0.003	0.38678	0.360335	0.397112	0.418235	0.329086	0.478808	0.395059	0.45687	0.533036	0.450606	0.514576	0.555976	0.484973	0.49934	-0.10428
cg14775296	chr2	66672841	66672842	-	0.047	0.944827	0.954456	0.95025	0.942743	0.961114	0.94442	0.949635	0.679508	0.944889	0.763225	0.950914	0.699179	0.708758	0.791079	0.158556
cg14794281	chr19	44324467	44324468	+	0.001	0.565054	0.491361	0.557129	0.582859	0.54791	0.532096	0.546068	0.679495	0.676683	0.686702	0.626747	0.635646	0.698428	0.667284	-0.121215
cg14794445	chr15	29396429	29396430	-	0.007	0.462129	0.667295	0.492635	0.559304	0.596019	0.522737	0.55002	0.601803	0.616853	0.649765	0.703953	0.762622	0.802879	0.689646	-0.139626
cg14794936	chr10	88471856	88471857	-	0.021	0.333801	0.590528	0.414916	0.483396	0.453525	0.456607	0.455462	0.475568	0.553485	0.47711	0.673006	0.604637	0.594406	0.563035	-0.107573
cg14801669	chr20	61974103	61974104	-	0.021	0.722048	0.879736	0.759642	0.77876	0.945373	0.778195	0.810626	0.91806	0.925898	0.822999	0.859893	0.982909	0.979947	0.914951	-0.104325
cg14811105	chr2	157186321	157186322	-	0.014	0.569597	0.738037	0.562192	0.613047	0.572877	0.664504	0.620042	0.691843	0.61613	0.72345	0.763684	0.757761	0.799234	0.72535	-0.105308
cg14844466	chr14	54908674	54908675	+	0.025	0.504217	0.786493	0.521764	0.619478	0.465123	0.621958	0.586506	0.598754	0.708646	0.649149	0.783867	0.707783	0.777917	0.704353	-0.117847
cg14910288	chr18	10033220	10033221	-	0.044	0.298897	0.766528	0.423558	0.61044	0.571681	0.612633	0.547289	0.54334	0.74893	0.565468	0.795192	0.736632	0.831478	0.703507	-0.156217
cg14929208	chr3	156273297	156273298	+	0.008	0.297873	0.325498	0.363339	0.281154	0.281769	0.461812	0.335241	0.37741	0.430202	0.374893	0.529323	0.477177	0.456986	0.440998	-0.105758
cg14962032	chr2	202122669	202122670	-	0.024	0.190972	0.390631	0.251484	0.302453	0.341413	0.138673	0.269271	0.336164	0.384072	0.261297	0.406891	0.462348	0.522887	0.39561	-0.126339
cg14966613	chr22	25423700	25423701	-	0.001	0.792556	0.848393	0.835329	0.782083	0.861837	0.778099	0.816383	0.875154	0.926948	0.876149	0.947076	0.950807	0.94373	0.919977	-0.103595
cg14968732	chr12	39298639	39298640	-	0.038	0.312278	0.697093	0.384881	0.48517	0.513473	0.584017	0.496152	0.573549	0.670109	0.390306	0.722872	0.759456	0.739504	0.642633	-0.146481
cg14970273	chr19	37794573	37794574	+	0.016	0.599979	0.623478	0.536586	0.366439	0.488206	0.600006	0.535782	0.529604	0.686344	0.626427	0.67033	0.905566	0.655844	0.679019	-0.143237
cg15031253	chr19	55476665	55476666	+	0.05	0.952168	0.930299	0.837699	0.560983	0.918279	0.806238	0.834278	0.963777	0.884283	0.937399	0.945928	0.923823	0.951214	0.934404	-0.100127
cg15036867	chr7	93251418	93251419	+	0.012	0.250275	0.50442	0.308182	0.294011	0.434971	0.336659	0.354753	0.460556	0.499313	0.363153	0.485274	0.494566	0.474032	0.462816	-0.108063
cg15070513	chr17	37782685	37782686	+	0.015	0.298529	0.3413	0.329501	0.323368	0.473523	0.331462	0.349614	0.389704	0.553324	0.345165	0.428571	0.515231	0.495459	0.454576	-0.104962
cg15077193	chr19	802989	802990	-	0.01	0.55835	0.505773	0.546763	0.482744	0.540092	0.397019	0.505124	0.53939	0.598175	0.600633	0.744091	0.626729	0.536176	0.607532	-0.102409
cg15118447	chr6	159220343	159220344	+	0.007	0.740633	0.69543	0.884887	0.562011	0.389634	0.731933	0.667421	0.906745	0.886012	0.766997	0.810289	0.860978	0.759733	0.831792	-0.164371
cg15132013	chr1	2163529	2163530	-	0.01	0.50377	0.727801	0.587228	0.616994	0.583302	0.64143	0.610088	0.663279	0.774706	0.63002	0.832881	0.732958	0.831859	0.744284	-0.134196
cg15160709	chr2	72357937	72357938	+	0.034	0.521883	0.717039	0.501975	0.58895	0.670347	0.723917	0.620685	0.662561	0.684417	0.631654	0.828118	0.780489	0.753324	0.723427	-0.102742
cg15161667	chr11	46940613	46940614	-	0.012	0.620289	0.785202	0.724302	0.709306	0.790682	0.661539	0.71522	0.777294	0.800489	0.73302	0.869278	0.88586	0.828079	0.81567	-0.10045
cg15225701	chr5	108083455	108083456	+	0.002	0.305303	0.632451	0.530495	0.489021	0.400226	0.503974	0.476912	0.516977	0.723552	0.67569	0.703202	0.704622	0.737061	0.676851	-0.199939
cg15246805	chr6	133584189	133584190	-	0.008	0.719048	0.795141	0.667735	0.754976	0.84836	0.676652	0.743652	0.889439	0.872125	0.801578	0.858736	0.84899	0.837181	0.851342	-0.10769
cg15255946	chr6	32729563	32729564	+	0.033	0.563937	0.613519	0.576996	0.520923	0.683624	0.712244	0.611874	0.836984	0.678179	0.61153	0.729064	0.643681	0.84051	0.723325	-0.111451
cg15296664	chr12	89748773	89748774	-	0.049	0.577972	0.778544	0.568005	0.63035	0.662424	0.700035	0.652888	0.671304	0.62348	0.693572	0.819789	0.860531	0.891255	0.759989	-0.1071
cg15371815	chr2	36582144	36582145	+	0.008	0.445198	0.522576	0.493815	0.524487	0.500107	0.658213	0.524066	0.571957	0.679041	0.639247	0.676256	0.63149	0.637781	0.639295	-0.11523
cg15392101	chr6	12426773	12426774	+	0.008	0.816049	0.879714	0.741717	0.526369	0.720757	0.839888	0.754082	0.826782	0.851618	0.881093	0.896302	0.886516	0.909128	0.87524	-0.121158
cg15498134	chr1	25246854	25246855	+	0.009	0.735274	0.882373	0.666151	0.704462	0.697645	0.722086	0.734665	0.743312	0.848377	0.826711	0.914114	0.909028	0.906852	0.858066	-0.123401
cg15637765	chr5	14145681	14145682	-	0.002	0.577598	0.568095	0.613729	0.590442	0.555337	0.572895	0.579683	0.611068	0.688175	0.667012	0.738078	0.714083	0.733119	0.691923	-0.11224
cg15643428	chr18	77171872	77171873	-	0.006	0.762533	0.929601	0.738832	0.833813	0.783141	0.808056	0.809329	0.845576	0.932965	0.870917	0.964397	0.964683	0.963952	0.923748	-0.114419
cg15664152	chr7	129008407	129008408	-	0	0.472343	0.620482	0.524289	0.541174	0.586879	0.594793	0.55666	0.630522	0.742905	0.650649	0.757285	0.677833	0.657739	0.686155	-0.129495
cg15676292	chr7	141069418	141069419	+	0.009	0.438051	0.529444	0.424011	0.539944	0.594151	0.447741	0.495557	0.564494	0.603275	0.530068	0.608622	0.677083	0.614128	0.599612	-0.104055
cg15773974	chr18	77292134	77292135	+	0.03	0.679942	0.191569	0.590989	0.535968	0.186253	0.216772	0.400249	0.673191	0.699941	0.362822	0.665837	0.601516	0.783941	0.631208	-0.230959
cg15794778	chrY	21665021	21665022	-	0.003	0.371924	0.330903	0.31511	0.445145	0.425604	0.361362	0.375008	0.513003	0.465741	0.40421	0.459507	0.556722	0.51874	0.486321	-0.111312
cg15829088	chr1	247802935	247802936	-	0.046	0.212453	0.332711	0.0778167	0.262219	0.222501	0.299401	0.234517	0.363659	0.3601	0.0829182	0.437302	0.458464	0.477207	0.363275	-0.128758
cg15846434	chr18	76733103	76733104	+	0.005	0.434826	0.556777	0.593577	0.39174	0.561778	0.520516	0.509869	0.647996	0.615947	0.534063	0.678151	0.66791	0.628455	0.628754	-0.118885
cg15888472	chr17	79000968	79000969	+	0.014	0.505262	0.729078	0.494004	0.606735	0.447344	0.479814	0.543706	0.567263	0.666628	0.569205	0.849851	0.825572	0.780017	0.709756	-0.16605
cg15896084	chr13	114927664	114927665	+	0.035	0.530241	0.757515	0.592309	0.530345	0.653586	0.607938	0.611989	0.736899	0.683911	0.572298	0.695122	0.772967	0.815345	0.712757	-0.100768
cg15915602	chr2	114737459	114737460	-	0.007	0.714382	0.527015	0.542423	0.846816	0.786478	0.699148	0.686044	0.86196	0.734876	0.88758	0.90534	0.786624	0.839438	0.835969	-0.149926
cg15938260	chr17	80804078	80804079	+	0.024	0.637011	0.927138	0.645846	0.801698	0.751664	0.756979	0.75339	0.732009	0.87204	0.886757	0.938217	0.925385	0.929701	0.880685	-0.127295
cg15988792	chr20	25039314	25039315	-	0.005	0.283002	0.366846	0.309512	0.309298	0.323553	0.412473	0.334114	0.447187	0.472835	0.34712	0.499478	0.493951	0.515741	0.462719	-0.128605
cg16059161	chr18	76498163	76498164	-	0.001	0.643082	0.944029	0.945619	0.917881	0.700881	0.619289	0.79513	0.955048	0.957162	0.963479	0.937808	0.952374	0.95687	0.95379	-0.15866
cg16075139	chr11	2406923	2406924	+	0.025	0.66453	0.853043	0.67767	0.812624	0.587444	0.72733	0.72044	0.732179	0.8398	0.868731	0.912495	0.795646	0.814798	0.827275	-0.106834
cg16122424	chr15	41258337	41258338	+	0.006	0.589413	0.782113	0.640544	0.634558	0.778902	0.604188	0.67162	0.815008	0.773036	0.741467	0.821141	0.782485	0.809938	0.790513	-0.118893
cg16122592	chrX	26210712	26210713	+	0.001	0.0513974	0.931538	0.94512	0.931831	0.934713	0.937969	0.788761	0.939716	0.951383	0.970264	0.949371	0.94602	0.960686	0.952907	-0.164145
cg16134191	chr11	31847509	31847510	-	0.014	0.413037	0.520992	0.48328	0.402375	0.455849	0.399128	0.445777	0.521839	0.456951	0.467597	0.535635	0.709067	0.700192	0.565214	-0.119437
cg16270079	chr3	48456686	48456687	+	0.018	0.679327	0.911314	0.689433	0.774407	0.78035	0.671254	0.751014	0.831335	0.894705	0.720797	0.938366	0.939273	0.937945	0.87707	-0.126056
cg16271424	chr10	99080594	99080595	-	0.009	0.23599	0.339206	0.217838	0.276232	0.351294	0.316548	0.289518	0.267523	0.434332	0.333481	0.571465	0.421517	0.627708	0.442671	-0.153153
cg16282892	chr3	193987757	193987758	+	0.028	0.59243	0.819379	0.676593	0.519861	0.770107	0.647569	0.67099	0.796454	0.720756	0.669995	0.813146	0.88475	0.860914	0.791003	-0.120013
cg16304656	chr7	641337	641338	-	0.002	0.513911	0.623149	0.567986	0.504069	0.584719	0.587854	0.563615	0.598774	0.632035	0.644585	0.703342	0.724352	0.711807	0.669149	-0.105535
cg16450309	chr3	170626822	170626823	-	0.033	0.250208	0.406868	0.119333	0.414737	0.343983	0.316428	0.308593	0.321842	0.391742	0.317402	0.477891	0.452762	0.554171	0.419302	-0.110709
cg16452651	chr21	35016873	35016874	+	0.005	0.734577	0.813898	0.763929	0.689718	0.814735	0.705984	0.753807	0.80953	0.865276	0.78905	0.884953	0.898784	0.880511	0.854684	-0.100877
cg16479633	chr8	20080666	20080667	-	0.021	0.496956	0.577491	0.60594	0.521584	0.69182	0.585253	0.579841	0.731995	0.687939	0.584102	0.688119	0.842721	0.627228	0.693684	-0.113844
cg16481280	chr6	32120955	32120956	+	0.011	0.268467	0.42143	0.167475	0.322626	0.30381	0.262693	0.291084	0.318419	0.390149	0.399634	0.402494	0.485909	0.592062	0.431445	-0.140361
cg16492597	chr5	133332095	133332096	+	0.01	0.530903	0.734527	0.585528	0.618273	0.6178	0.609921	0.616159	0.648123	0.770019	0.688847	0.757923	0.698169	0.735584	0.716444	-0.100286
cg16518861	chr14	35871715	35871716	-	0.018	0.429344	0.642012	0.470031	0.495508	0.529719	0.463088	0.50495	0.503276	0.706339	0.562905	0.663582	0.611463	0.638104	0.614278	-0.109328
cg16547579	chr20	4954333	4954334	+	0.025	0.173331	0.365845	0.152034	0.235911	0.367822	0.317293	0.268706	0.391295	0.468432	0.332181	0.258694	0.358515	0.508884	0.386333	-0.117628
cg16552822	chr1	19278734	19278735	+	0.001	0.59965	0.677433	0.594303	0.614284	0.683309	0.535788	0.617461	0.686706	0.72098	0.695943	0.750651	0.748631	0.725879	0.721465	-0.104004
cg16554941	chr5	60764072	60764073	-	0.025	0.610778	0.795054	0.644596	0.652857	0.600316	0.587853	0.648576	0.63633	0.846868	0.755255	0.756409	0.774484	0.757064	0.754402	-0.105826
cg16580616	chr1	235256519	235256520	-	0.01	0.732066	0.929292	0.675793	0.750507	0.781354	0.686241	0.759209	0.805332	0.884629	0.84748	0.956657	0.936402	0.924861	0.89256	-0.133351
cg16582517	chr3	5025885	5025886	-	0.027	0.390577	0.642329	0.495909	0.532055	0.624091	0.479459	0.527403	0.538456	0.667898	0.583078	0.713269	0.657525	0.658478	0.636451	-0.109047
cg16634544	chr3	117520653	117520654	-	0.005	0.542823	0.83041	0.675003	0.766723	0.77495	0.729015	0.719821	0.780201	0.867197	0.759872	0.859593	0.879672	0.863995	0.835088	-0.115268
cg16651780	chr16	81037892	81037893	+	0.042	0.430021	0.600939	0.64245	0.374701	0.436041	0.559973	0.507354	0.597818	0.766142	0.552066	0.647662	0.550575	0.640881	0.625857	-0.118503
cg16663419	chr8	145033566	145033567	-	0.008	0.705987	0.858453	0.795666	0.749885	0.8824	0.703191	0.782597	0.900596	0.873485	0.858312	0.8858	0.920053	0.87803	0.886046	-0.103449
cg16667251	chr2	54697181	54697182	+	0.012	0.368808	0.622904	0.509497	0.504815	0.490745	0.528671	0.50424	0.496837	0.711256	0.640003	0.671793	0.606547	0.640843	0.62788	-0.12364
cg16681083	chr1	44727237	44727238	+	0.002	0.711407	0.796019	0.733334	0.854179	0.792601	0.674812	0.760392	0.830268	0.837977	0.825091	0.95074	0.953635	0.922908	0.88677	-0.126378
cg16685760	chrX	145701257	145701258	+	0.027	0.842799	0.906563	0.65224	0.721801	0.603594	0.675983	0.73383	0.898014	0.858575	0.881963	0.697712	0.971305	0.960768	0.878056	-0.144226
cg16708895	chrX	144898249	144898250	-	0.008	0.451932	0.669947	0.508156	0.555699	0.599253	0.604592	0.56493	0.590861	0.686807	0.621694	0.788325	0.698126	0.719022	0.684139	-0.119209
cg16755924	chrX	25041099	25041100	-	0.042	0.159554	0.329946	0.146055	0.16545	0.336512	0.211734	0.224875	0.407502	0.273528	0.136611	0.333836	0.550216	0.542499	0.374032	-0.149157
cg16773028	chr1	111148339	111148340	-	0.028	0.561935	0.790386	0.652643	0.750702	0.664155	0.578114	0.666322	0.673289	0.735047	0.729346	0.877401	0.868874	0.770602	0.77576	-0.109437
cg16809460	chr1	50885369	50885370	+	0.033	0.216682	0.617222	0.247822	0.496439	0.449849	0.398786	0.404467	0.480729	0.591568	0.318629	0.647366	0.724119	0.64038	0.567132	-0.162665
cg16850897	chr7	100343110	100343111	-	0.027	0.0961247	0.062705	0.265742	0.263977	0.264118	0.150266	0.183822	0.280727	0.351256	0.130514	0.307595	0.335701	0.321839	0.287939	-0.104117
cg16867680	chr6	47382645	47382646	+	0.029	0.369446	0.70321	0.374609	0.587652	0.40645	0.637713	0.51318	0.495657	0.723098	0.636488	0.720126	0.666381	0.713399	0.659192	-0.146012
cg16907885	chr17	79317768	79317769	+	0	0.36267	0.49539	0.422138	0.41703	0.439851	0.380202	0.419547	0.514582	0.485057	0.529171	0.62221	0.596496	0.553679	0.550199	-0.130653
cg16916782	chr13	113261142	113261143	+	0.015	0.472907	0.62283	0.383382	0.501914	0.553975	0.437377	0.495397	0.501217	0.65466	0.650301	0.634644	0.627276	0.590861	0.609826	-0.114429
cg16948827	chr11	126455885	126455886	-	0.007	0.42154	0.386343	0.490583	0.346652	0.512359	0.386994	0.424078	0.487971	0.567739	0.466801	0.518991	0.575796	0.533171	0.525078	-0.101
cg16960810	chr3	13594910	13594911	-	0.002	0.688366	0.745098	0.622169	0.667281	0.783588	0.702611	0.701519	0.803575	0.853063	0.829512	0.729261	0.812598	0.875204	0.817202	-0.115683
cg16985288	chr1	227015456	227015457	-	0	0.643903	0.76733	0.736551	0.689757	0.763492	0.636657	0.706281	0.815437	0.834641	0.778784	0.83283	0.834542	0.801528	0.816294	-0.110012
cg16998831	chr7	187686	187687	+	0.03	0.620058	0.818543	0.671137	0.786701	0.759512	0.797306	0.74221	0.730448	0.830136	0.777236	0.943126	0.853697	0.948236	0.847147	-0.104937
cg17004353	chr11	3073441	3073442	+	0.019	0.304167	0.547806	0.303722	0.371376	0.223567	0.405816	0.359409	0.392631	0.51151	0.443703	0.610626	0.444195	0.585836	0.498083	-0.138674
cg17014757	chr1	203156097	203156098	-	0.015	0.434993	0.605237	0.510205	0.49035	0.6	0.622309	0.543849	0.723227	0.696647	0.52655	0.68785	0.6137	0.707044	0.659169	-0.115321
cg17072494	chr6	149401166	149401167	+	0.001	0.67569	0.686836	0.694912	0.645726	0.710897	0.636914	0.675162	0.809265	0.781187	0.714042	0.795697	0.784763	0.778027	0.777164	-0.102001
cg17120578	chr8	38329836	38329837	+	0.001	0.754181	0.822811	0.768211	0.766378	0.821646	0.705241	0.773078	0.896067	0.841047	0.827059	0.910069	0.911345	0.905879	0.881911	-0.108833
cg17180284	chr13	31783983	31783984	+	0.008	0.509545	0.637746	0.570391	0.553769	0.665725	0.503262	0.573406	0.617312	0.65314	0.645103	0.716037	0.79113	0.729594	0.692053	-0.118646
cg17259358	chr6	99273385	99273386	+	0.01	0.386233	0.525488	0.381908	0.433247	0.468953	0.431384	0.437869	0.457929	0.561403	0.434488	0.615727	0.595684	0.571645	0.539479	-0.10161
cg17301216	chr15	89920348	89920349	-	0.012	0.459073	0.676149	0.513717	0.604412	0.600779	0.526914	0.563507	0.588495	0.721437	0.606985	0.747878	0.722311	0.677727	0.677472	-0.113965
cg17310258	chr11	31847173	31847174	+	0.022	0.569094	0.702044	0.645626	0.630693	0.580559	0.543953	0.611995	0.629689	0.619099	0.705821	0.682115	0.846521	0.816249	0.716582	-0.104588
cg17344932	chr17	38183730	38183731	-	0.033	0.551756	0.652111	0.448574	0.530708	0.523131	0.436048	0.523721	0.512957	0.678489	0.543309	0.671611	0.647696	0.736888	0.631825	-0.108104
cg17376853	chr11	405970	405971	-	0.003	0.680328	0.718636	0.679742	0.635633	0.783024	0.628357	0.68762	0.811116	0.914494	0.887887	0.880081	0.786531	0.770439	0.841758	-0.154138
cg17480278	chr3	62364834	62364835	+	0.008	0.432366	0.474416	0.460767	0.511985	0.457824	0.369449	0.451135	0.511345	0.669006	0.491331	0.474878	0.585753	0.633273	0.560931	-0.109796
cg17521583	chr4	129474618	129474619	-	0.043	0.229094	0.702756	0.335959	0.472798	0.40891	0.55818	0.451283	0.593529	0.701496	0.28878	0.708102	0.737773	0.842646	0.645388	-0.194105
cg17746638	chr16	18478530	18478531	-	0.015	0.649459	0.588473	0.590576	0.580941	0.923897	0.885648	0.703166	0.676371	0.902086	0.944438	0.912922	0.929972	0.915607	0.880233	-0.177067
cg17753212	chr17	6659562	6659563	-	0.008	0.634102	0.808234	0.620151	0.590833	0.671206	0.654137	0.66311	0.718422	0.781973	0.77472	0.782076	0.805332	0.818697	0.780203	-0.117093
cg17783140	chr6	151950212	151950213	-	0.041	0.961589	0.951945	0.967032	0.382946	0.972913	0.959733	0.866026	0.972007	0.962225	0.972422	0.966809	0.96861	0.965956	0.968005	-0.101978
cg17815933	chr12	8191646	8191647	-	0.041	0.448515	0.59252	0.532545	0.517981	0.463068	0.520079	0.512451	0.604949	0.573791	0.404685	0.648137	0.645856	0.828643	0.617677	-0.105226
cg17826518	chr1	13912116	13912117	-	0.025	0.362031	0.528344	0.361486	0.487357	0.605516	0.474526	0.469877	0.558631	0.591385	0.487953	0.623652	0.63437	0.560173	0.576027	-0.106151
cg17831440	chr13	113699526	113699527	-	0.017	0.435336	0.742568	0.410862	0.633678	0.495353	0.533372	0.541862	0.588622	0.792625	0.739115	0.779653	0.855313	0.540306	0.715939	-0.174077
cg17895907	chrX	146366330	146366331	-	0.049	0.0911439	0.806801	0.808037	0.794214	0.753115	0.718345	0.661943	0.765505	0.794072	0.837697	0.822663	0.769217	0.812306	0.800243	-0.138301
cg17902290	chr1	18060406	18060407	+	0.018	0.616115	0.845116	0.658555	0.726567	0.822321	0.673753	0.723738	0.881122	0.73335	0.790918	0.851339	0.889934	0.873888	0.836758	-0.113021
cg17918326	chr20	34823957	34823958	-	0.032	0.500089	0.921002	0.7526	0.875275	0.801518	0.801342	0.775304	0.798667	0.839123	0.92794	0.938494	0.880539	0.937102	0.886977	-0.111673
cg17978124	chr6	100053438	100053439	-	0.045	0.291326	0.354487	0.309782	0.223844	0.363455	0.275324	0.303036	0.337763	0.345873	0.264286	0.443039	0.584011	0.480325	0.409216	-0.10618
cg17983632	chr6	1621930	1621931	+	0.017	0.522848	0.778713	0.550898	0.512269	0.569603	0.600913	0.589207	0.577747	0.666478	0.732337	0.86824	0.78911	0.796179	0.738348	-0.149141
cg18000598	chr3	194342907	194342908	+	0.038	0.357369	0.393424	0.354401	0.386485	0.602187	0.278445	0.395385	0.415747	0.525986	0.437644	0.642316	0.459923	0.733374	0.535832	-0.140446
cg18008037	chr7	158272029	158272030	-	0.024	0.604429	0.808107	0.620542	0.674433	0.667062	0.644694	0.669878	0.655374	0.75784	0.675082	0.837274	0.883681	0.87533	0.780764	-0.110886
cg18039797	chr15	40509518	40509519	-	0.026	0.189391	0.343767	0.151405	0.280934	0.298798	0.16113	0.237571	0.213427	0.421464	0.319886	0.449789	0.365849	0.295367	0.344297	-0.106726
cg18057887	chr11	133800913	133800914	-	0.002	0.693166	0.776308	0.730315	0.699349	0.650494	0.720483	0.711686	0.758621	0.725019	0.901051	0.919881	0.913837	0.784842	0.833875	-0.122189
cg18087520	chr14	90862618	90862619	+	0.022	0.46671	0.695174	0.481304	0.548595	0.53982	0.510545	0.540358	0.577171	0.698843	0.541841	0.669377	0.65545	0.716324	0.643168	-0.10281
cg18189288	chr2	201262081	201262082	-	0.033	0.646881	0.601381	0.465358	0.502244	0.582887	0.595029	0.56563	0.423665	0.424339	0.443412	0.493482	0.357994	0.508242	0.441856	0.123774
cg18264728	chr5	39421189	39421190	+	0.022	0.442794	0.606232	0.432867	0.494874	0.691098	0.503359	0.528537	0.732673	0.568208	0.524881	0.756722	0.74388	0.688625	0.669165	-0.140628
cg18275589	chr5	39427599	39427600	-	0.003	0.711629	0.800718	0.752099	0.712957	0.838225	0.747712	0.760557	0.803847	0.874814	0.820232	0.894096	0.900444	0.874267	0.861283	-0.100727
cg18303397	chr3	129160135	129160136	-	0.014	0.624131	0.757346	0.625924	0.589956	0.687464	0.64716	0.65533	0.68049	0.750626	0.694676	0.786636	0.827118	0.878428	0.769662	-0.114332
cg18315943	chr5	3188374	3188375	+	0.028	0.68367	0.869033	0.723275	0.870342	0.85538	0.704582	0.78438	0.882847	0.93579	0.778379	0.922158	0.924322	0.866388	0.884981	-0.1006
cg18398753	chr1	180950955	180950956	+	0.035	0.602204	0.55312	0.745361	0.515686	0.692037	0.578405	0.614469	0.766276	0.749705	0.776315	0.801529	0.549581	0.720643	0.727341	-0.112873
cg18403361	chr14	38725750	38725751	-	0.019	0.701301	0.862733	0.602269	0.646468	0.696914	0.750479	0.710027	0.771514	0.761039	0.785775	0.911469	0.809772	0.90509	0.82411	-0.114083
cg18405140	chr19	1207644	1207645	+	0.016	0.5334	0.72553	0.60736	0.647459	0.701377	0.583005	0.633022	0.715954	0.690566	0.683318	0.791012	0.83777	0.699832	0.736409	-0.103387
cg18440839	chr8	141609380	141609381	-	0.001	0.769018	0.877934	0.798636	0.752648	0.809948	0.754031	0.793703	0.877587	0.970894	0.912828	0.938962	0.963718	0.94636	0.935058	-0.141356
cg18471664	chr3	5028143	5028144	-	0.016	0.494451	0.623626	0.551852	0.535732	0.691392	0.481505	0.563093	0.713776	0.691942	0.577694	0.703051	0.679597	0.633161	0.666537	-0.103443
cg18472159	chr5	3188172	3188173	-	0.024	0.692899	0.940601	0.668655	0.911553	0.891903	0.678777	0.797398	0.935525	0.946936	0.814054	0.941508	0.958468	0.925023	0.920252	-0.122854
cg18575730	chr13	96744289	96744290	+	0.005	0.305511	0.41494	0.365177	0.369126	0.396305	0.393301	0.37406	0.432048	0.483255	0.388578	0.550379	0.487085	0.539806	0.480192	-0.106132
cg18580322	chr14	31027815	31027816	-	0.031	0.631033	0.684566	0.722944	0.647322	0.524384	0.618417	0.638111	0.647706	0.795686	0.741125	0.780504	0.647521	0.823393	0.739322	-0.101211
cg18693985	chr5	173351052	173351053	-	0.005	0.221666	0.478742	0.215833	0.356783	0.49416	0.417801	0.364164	0.503418	0.493162	0.423049	0.585679	0.606808	0.50509	0.519534	-0.15537
cg18779283	chr3	45636154	45636155	+	0.004	0.310699	0.43653	0.478425	0.420787	0.328879	0.394248	0.394928	0.464317	0.534995	0.5003	0.596316	0.546614	0.446022	0.514761	-0.119833
cg18864581	chr15	66797614	66797615	-	0.011	0.0585629	0.0578941	0.0577186	0.0556611	0.0635365	0.0535988	0.0578287	0.0689092	0.543357	0.501125	0.0667383	0.0569365	0.0609077	0.216329	-0.1585
cg18866281	chr1	246948597	246948598	-	0.028	0.413405	0.641221	0.375721	0.572119	0.614136	0.490835	0.517906	0.587165	0.643954	0.567257	0.67154	0.610007	0.650742	0.621777	-0.103871
cg18877525	chr1	244303292	244303293	-	0.015	0.678273	0.875168	0.660413	0.709043	0.813512	0.691245	0.737942	0.771607	0.899271	0.770973	0.938043	0.895254	0.941568	0.869453	-0.13151
cg18892244	chr7	807596	807597	-	0.025	0.641669	0.88559	0.634391	0.751896	0.738075	0.705251	0.726145	0.748684	0.833884	0.765877	0.891991	0.857787	0.884945	0.830528	-0.104383
cg18906360	chr14	60633047	60633048	+	0.011	0.498467	0.533042	0.464506	0.558374	0.63966	0.496674	0.531787	0.691187	0.674538	0.555238	0.607251	0.689986	0.621366	0.639928	-0.10814
cg18937875	chr11	14930189	14930190	-	0.029	0.416895	0.462759	0.181974	0.302094	0.380448	0.250563	0.332456	0.633813	0.559578	0.178059	0.609933	0.729433	0.494656	0.534245	-0.20179
cg18973628	chr11	94245350	94245351	-	0.01	0.441139	0.547059	0.46945	0.424821	0.545841	0.450918	0.479871	0.532757	0.556027	0.499103	0.613072	0.686769	0.594967	0.580449	-0.100578
cg19017142	chr2	64431245	64431246	-	0.026	0.453762	0.707653	0.5995	0.521566	0.48167	0.523034	0.547864	0.525528	0.663263	0.615021	0.728203	0.701614	0.774151	0.667963	-0.120099
cg19067025	chr15	37398175	37398176	-	0.011	0.640675	0.748675	0.614482	0.703455	0.673964	0.616879	0.666355	0.699838	0.8672	0.660079	0.86848	0.822198	0.756631	0.779071	-0.112716
cg19080053	chr6	5132887	5132888	+	0.041	0.358147	0.537698	0.370348	0.476409	0.49517	0.442299	0.446679	0.436541	0.562019	0.407471	0.676617	0.673048	0.558857	0.552426	-0.105747
cg19081101	chr1	203156625	203156626	-	0.022	0.427285	0.313552	0.484142	0.53244	0.591668	0.489286	0.473062	0.682046	0.608625	0.594222	0.7347	0.458189	0.572965	0.608458	-0.135396
cg19087971	chr7	751233	751234	+	0	0.504567	0.497387	0.468132	0.387675	0.428744	0.402974	0.448247	0.552083	0.567924	0.629158	0.568173	0.578186	0.51905	0.569096	-0.120849
cg19151808	chr4	89619051	89619052	+	0.02	0.0405081	0.660593	0.61413	0.620221	0.634331	0.615495	0.53088	0.673934	0.613027	0.686202	0.632534	0.63975	0.6696	0.652508	-0.121628
cg19182557	chr2	130345355	130345356	+	0.008	0.754948	0.610392	0.612659	0.63934	0.755335	0.5813	0.658996	0.810757	0.741063	0.73632	0.811613	0.803533	0.786935	0.781704	-0.122708
cg19255333	chr17	17457745	17457746	-	0.011	0.685389	0.863261	0.721451	0.821036	0.893461	0.706517	0.781853	0.869812	0.83287	0.919623	0.91415	0.946524	0.959417	0.907066	-0.125213
cg19269749	chr2	127951414	127951415	-	0.024	0.672938	0.837743	0.730053	0.597086	0.796316	0.672066	0.7177	0.8454	0.764801	0.705895	0.869491	0.920961	0.882715	0.831544	-0.113844
cg19287349	chr15	63358260	63358261	-	0.006	0.453756	0.639775	0.476726	0.547812	0.534516	0.48244	0.522504	0.649502	0.650148	0.549921	0.717076	0.756356	0.571829	0.649139	-0.126634
cg19302996	chr17	73780495	73780496	+	0.027	0.158425	0.338847	0.147177	0.194453	0.175059	0.216155	0.20502	0.175383	0.317613	0.311114	0.321764	0.304367	0.524431	0.325779	-0.120759
cg19359983	chr13	103346900	103346901	-	0.033	0.916213	0.880699	0.692161	0.600692	0.863568	0.621988	0.762554	0.880412	0.907749	0.929127	0.892121	0.832228	0.924752	0.894398	-0.131845
cg19360907	chr22	37977445	37977446	-	0.004	0.649149	0.802209	0.608108	0.679963	0.718841	0.674212	0.688747	0.772866	0.78169	0.717296	0.833068	0.836125	0.818954	0.793333	-0.104586
cg19375418	chr18	77292410	77292411	+	0.04	0.804409	0.307814	0.689954	0.633946	0.364098	0.304428	0.517441	0.80983	0.791215	0.463851	0.794802	0.664292	0.853206	0.729533	-0.212091
cg19414630	chr8	48648874	48648875	-	0.005	0.40808	0.577011	0.448669	0.470874	0.557798	0.474987	0.48957	0.593641	0.586337	0.514191	0.729722	0.66145	0.572257	0.6096	-0.12003
cg19418458	chr7	158789849	158789850	+	0.026	0.496664	0.466783	0.519376	0.383007	0.382477	0.699589	0.491316	0.491967	0.675549	0.647873	0.599799	0.729973	0.547837	0.6155	-0.124184
cg19443023	chr17	78923344	78923345	-	0.007	0.770006	0.808157	0.825291	0.873276	0.931848	0.724893	0.822245	0.94823	0.924743	0.900446	0.927775	0.971315	0.924775	0.932881	-0.110636
cg19461320	chr12	125473848	125473849	-	0.004	0.39224	0.346483	0.303974	0.252366	0.452591	0.364421	0.352012	0.401356	0.517155	0.406454	0.539228	0.503953	0.477482	0.474271	-0.122259
cg19476622	chr18	20714485	20714486	-	0.018	0.488642	0.732394	0.539538	0.554671	0.524633	0.606477	0.574393	0.569229	0.713781	0.58885	0.816559	0.769565	0.806481	0.710744	-0.136352
cg19476788	chr18	77172117	77172118	-	0.014	0.527551	0.778438	0.589694	0.620543	0.632966	0.620662	0.628309	0.68109	0.71573	0.655902	0.816754	0.855048	0.842801	0.761221	-0.132912
cg19495714	chr14	105218551	105218552	+	0.003	0.721796	0.514714	0.603025	0.698165	0.486777	0.564587	0.598177	0.658125	0.735934	0.722033	0.776139	0.786397	0.796679	0.745884	-0.147707
cg19502207	chr14	55337268	55337269	-	0.012	0.649596	0.821724	0.621958	0.720538	0.68342	0.834139	0.721896	0.807091	0.812841	0.786891	0.849373	0.8857	0.868981	0.835146	-0.113251
cg19504955	chr1	176873449	176873450	+	0.017	0.541234	0.790015	0.554675	0.555987	0.662081	0.578068	0.613677	0.705299	0.72763	0.593969	0.794151	0.827327	0.786066	0.739074	-0.125397
cg19506849	chr10	114767609	114767610	-	0.001	0.780356	0.91032	0.775978	0.862583	0.701819	0.822893	0.808991	0.897819	0.940374	0.941246	0.925722	0.935895	0.924253	0.927551	-0.11856
cg19591080	chrX	39868677	39868678	-	0.01	0.213105	0.356438	0.337803	0.322544	0.329695	0.334687	0.315712	0.429712	0.366572	0.298671	0.477295	0.53882	0.495224	0.434382	-0.11867
cg19597498	chr3	96495651	96495652	-	0.039	0.443391	0.617065	0.359126	0.757675	0.202189	0.578486	0.492989	0.612276	0.67721	0.699938	0.666995	0.56002	0.748397	0.660806	-0.167817
cg19620383	chr15	60860767	60860768	+	0.011	0.679563	0.870454	0.67705	0.763261	0.803035	0.735141	0.754751	0.811502	0.860692	0.791738	0.903552	0.899141	0.887071	0.85895	-0.104199
cg19642306	chr7	157951097	157951098	+	0.002	0.790741	0.886125	0.814205	0.835747	0.481035	0.836619	0.774079	0.888756	0.909328	0.903353	0.910134	0.87326	0.911087	0.89932	-0.125241
cg19695805	chr11	9385645	9385646	-	0.001	0.315232	0.151428	0.104752	0.290101	0.299396	0.294448	0.242559	0.350742	0.299054	0.339143	0.531435	0.539051	0.528595	0.431337	-0.188777
cg19701531	chr7	76026560	76026561	+	0.011	0.528181	0.646429	0.578289	0.47207	0.588909	0.581292	0.565862	0.643113	0.723423	0.568047	0.618305	0.745823	0.710129	0.66814	-0.102278
cg19762533	chr7	39311400	39311401	-	0.033	0.289039	0.39503	0.25815	0.297719	0.405585	0.276446	0.320328	0.518357	0.373126	0.275637	0.361162	0.76934	0.696721	0.499057	-0.178729
cg19779057	chr1	204073369	204073370	-	0.008	0.657033	0.741037	0.732663	0.682757	0.774051	0.613219	0.700127	0.815335	0.819324	0.726513	0.844823	0.851088	0.7785	0.805931	-0.105804
cg19816125	chr7	612781	612782	+	0.025	0.567441	0.599017	0.603427	0.523775	0.692266	0.543001	0.588155	0.661924	0.623367	0.624333	0.650827	0.774311	0.805306	0.690011	-0.101857
cg19828063	chr13	112626953	112626954	+	0.021	0.865129	0.931532	0.943783	0.887577	0.916526	0.87381	0.90306	0.73438	0.678496	0.774707	0.915046	0.740817	0.649018	0.748744	0.154316
cg19839325	chr19	18761132	18761133	-	0.045	0.508132	0.630221	0.58157	0.489084	0.665605	0.527634	0.567041	0.622721	0.645853	0.526481	0.747568	0.72361	0.755046	0.670213	-0.103172
cg19885037	chr3	4762242	4762243	+	0.001	0.659	0.720303	0.730554	0.649899	0.735557	0.631309	0.68777	0.758194	0.812476	0.780701	0.84699	0.837396	0.742824	0.79643	-0.10866
cg19889856	chr7	134856654	134856655	+	0.046	0.407773	0.662533	0.453985	0.579657	0.369902	0.409935	0.480631	0.554383	0.684481	0.422982	0.737558	0.524767	0.713186	0.606226	-0.125596
cg19928943	chr14	83767935	83767936	+	0.024	0.477321	0.628642	0.547922	0.484561	0.656899	0.546954	0.55705	0.674655	0.656834	0.534378	0.614856	0.764656	0.723436	0.661469	-0.104419
cg19985421	chr11	77791376	77791377	+	0.002	0.445302	0.436345	0.410124	0.465215	0.443877	0.349073	0.424989	0.495157	0.599796	0.511561	0.554674	0.460855	0.568471	0.531752	-0.106763
cg19998573	chr2	129513081	129513082	-	0.049	0.398189	0.66276	0.342155	0.464809	0.510355	0.518404	0.482779	0.459936	0.586518	0.528302	0.64078	0.688527	0.644511	0.591429	-0.108651
cg20059012	chr12	53613154	53613155	+	0.007	0.210576	0.330729	0.289928	0.280008	0.253664	0.294556	0.276577	0.290299	0.309332	0.320597	0.5183	0.449644	0.482935	0.395184	-0.118608
cg20124078	chr12	129460903	129460904	+	0.011	0.425918	0.574025	0.482457	0.474724	0.475406	0.527206	0.493289	0.475537	0.62337	0.54184	0.6413	0.693812	0.611566	0.597904	-0.104615
cg20124409	chr22	42980637	42980638	-	0.044	0.709653	0.906907	0.473872	0.760125	0.884009	0.725281	0.743308	0.864006	0.830828	0.791623	0.859784	0.910634	0.876311	0.855531	-0.112223
cg20135243	chr8	27183285	27183286	-	0.015	0.356068	0.587514	0.481437	0.518718	0.472424	0.553684	0.494974	0.525022	0.571962	0.506434	0.726363	0.654896	0.680596	0.610879	-0.115905
cg20209499	chr2	26929892	26929893	+	0.037	0.609323	0.783097	0.595677	0.645477	0.664344	0.688304	0.66437	0.577545	0.822873	0.810685	0.838711	0.715731	0.869572	0.77252	-0.108149
cg20220242	chr21	30392188	30392189	+	0.002	0.823267	0.470368	0.777504	0.754197	0.771782	0.756898	0.725669	0.793133	0.864556	0.833662	0.807579	0.910714	0.91225	0.853649	-0.12798
cg20250935	chr14	90862689	90862690	+	0.04	0.450748	0.599237	0.341402	0.328069	0.296773	0.417063	0.405549	0.421826	0.527612	0.498045	0.635624	0.438938	0.597552	0.519933	-0.114384
cg20268893	chr2	106362547	106362548	-	0.007	0.419395	0.540195	0.595903	0.45371	0.599653	0.482076	0.515155	0.614332	0.734547	0.567797	0.809831	0.64542	0.574012	0.657657	-0.142501
cg20299697	chr3	138069423	138069424	+	0.023	0.724959	0.952936	0.747112	0.91785	0.755516	0.767682	0.811009	0.83305	0.939895	0.896066	0.946367	0.946101	0.951102	0.918763	-0.107754
cg20305005	chr2	166151648	166151649	-	0.04	0.524357	0.775682	0.570903	0.611867	0.583477	0.661451	0.62129	0.566933	0.702261	0.72789	0.802959	0.714188	0.846973	0.726867	-0.105578
cg20314918	chr2	166151447	166151448	+	0.034	0.69642	0.807991	0.646692	0.673758	0.58376	0.683413	0.682006	0.613973	0.804163	0.805344	0.840475	0.771989	0.876447	0.785398	-0.103393
cg20327845	chr10	3138418	3138419	+	0.009	0.707661	0.728221	0.794454	0.67705	0.833496	0.69191	0.738799	0.788153	0.88367	0.819891	0.806897	0.917814	0.845771	0.843699	-0.104901
cg20382867	chr2	12310085	12310086	+	0.015	0.400369	0.547141	0.416421	0.456586	0.519615	0.366052	0.451031	0.514834	0.607705	0.446403	0.664591	0.723779	0.538448	0.582627	-0.131596
cg20399462	chr13	112627641	112627642	+	0.012	0.428078	0.534867	0.502828	0.587642	0.55276	0.507792	0.518994	0.538789	0.518369	0.610534	0.756104	0.613097	0.8012	0.639682	-0.120687
cg20418125	chr11	133099168	133099169	+	0.01	0.649015	0.799646	0.691199	0.726011	0.809426	0.651359	0.721109	0.801478	0.78576	0.797354	0.886173	0.877587	0.828274	0.829438	-0.108329
cg20418725	chr2	202122474	202122475	-	0.018	0.48974	0.731717	0.530489	0.58198	0.624771	0.50654	0.57754	0.648371	0.714114	0.603018	0.670911	0.715706	0.727932	0.680009	-0.102469
cg20453820	chr12	10253743	10253744	+	0.03	0.661918	0.560002	0.73447	0.544212	0.740149	0.63679	0.646257	0.88898	0.702959	0.708125	0.731724	0.80051	0.682554	0.752475	-0.106218
cg20503657	chr10	835505	835506	+	0.044	0.211689	0.18129	0.191921	0.202615	0.310024	0.226104	0.220607	0.314419	0.231503	0.134011	0.542962	0.658955	0.518174	0.400004	-0.179397
cg20521702	chr3	98452812	98452813	-	0.033	0.411152	0.602517	0.441859	0.468081	0.485482	0.555137	0.494038	0.466524	0.637979	0.467867	0.664298	0.679894	0.671132	0.597949	-0.103911
cg20540428	chr3	73045686	73045687	+	0.03	0.299422	0.368026	0.425763	0.669136	0.45073	0.5075	0.45343	0.50534	0.46803	0.740896	0.669254	0.671264	0.451022	0.584301	-0.130871
cg20559405	chr3	61580543	61580544	+	0.003	0.433916	0.534966	0.397273	0.459069	0.535795	0.437044	0.466344	0.517207	0.607031	0.536104	0.661064	0.652296	0.626537	0.60004	-0.133696
cg20576162	chr4	667306	667307	+	0.045	0.287941	0.395047	0.275516	0.450373	0.401734	0.543516	0.392354	0.326172	0.492254	0.602426	0.562253	0.544684	0.458412	0.4977	-0.105346
cg20582941	chr3	35721166	35721167	+	0.045	0.434372	0.68244	0.48288	0.546366	0.404316	0.495364	0.507623	0.41766	0.658219	0.575287	0.732209	0.644697	0.779387	0.634577	-0.126953
cg20603222	chr7	1096387	1096388	+	0.017	0.726739	0.955146	0.655888	0.679801	0.834134	0.802046	0.775626	0.805291	0.889975	0.90683	0.962827	0.956034	0.921584	0.90709	-0.131464
cg20605818	chr10	72166322	72166323	-	0.005	0.487253	0.686505	0.622764	0.550645	0.696434	0.596535	0.606689	0.676704	0.750333	0.658428	0.735862	0.735608	0.716692	0.712271	-0.105582
cg20647118	chr13	92051786	92051787	-	0.037	0.350061	0.507988	0.244858	0.477398	0.437925	0.479116	0.416224	0.538603	0.48801	0.364665	0.535981	0.660494	0.557725	0.524246	-0.108022
cg20648333	chr10	72298745	72298746	+	0.002	0.878238	0.888409	0.574588	0.86156	0.894549	0.483626	0.763495	0.891399	0.904372	0.914566	0.907913	0.919812	0.901954	0.906669	-0.143174
cg20702205	chr7	5731340	5731341	+	0.006	0.506125	0.721141	0.616896	0.6004	0.68667	0.631889	0.627187	0.682288	0.733788	0.698942	0.749812	0.78856	0.719912	0.728884	-0.101697
cg20732304	chr13	113752657	113752658	-	0.05	0.505371	0.666887	0.53861	0.518866	0.591455	0.479834	0.550171	0.609687	0.548599	0.496298	0.741486	0.731033	0.775351	0.650409	-0.100239
cg20786131	chr18	20714496	20714497	+	0.041	0.588203	0.818424	0.610238	0.654427	0.556021	0.687124	0.652406	0.613635	0.780204	0.653711	0.886938	0.854033	0.809071	0.766265	-0.113859
cg20848291	chr7	100343083	100343084	-	0.037	0.24089	0.0436019	0.370952	0.346561	0.354775	0.283493	0.273379	0.419832	0.423931	0.231877	0.403712	0.404025	0.375064	0.376407	-0.103028
cg20857709	chr2	43019727	43019728	+	0.017	0.121221	0.0689858	0.0929341	0.0899571	0.119957	0.0987559	0.0986351	0.364171	0.0708271	0.288978	0.104266	0.184874	0.481047	0.249027	-0.150392
cg20945853	chr5	133406542	133406543	-	0.008	0.470969	0.576321	0.53229	0.489532	0.597239	0.530699	0.532842	0.602568	0.600005	0.541148	0.718869	0.695651	0.683775	0.640336	-0.107495
cg20950033	chr14	20898781	20898782	+	0.004	0.648339	0.794676	0.702883	0.718466	0.769803	0.707866	0.723672	0.822453	0.764325	0.798542	0.86563	0.867885	0.868881	0.831286	-0.107614
cg20968595	chr11	133230305	133230306	-	0	0.673712	0.68718	0.649601	0.653823	0.723148	0.688053	0.679253	0.77861	0.779989	0.796688	0.701259	0.871886	0.831283	0.793286	-0.114033
cg20995778	chr19	55478262	55478263	-	0.01	0.764682	0.725829	0.687205	0.499274	0.610681	0.707173	0.665807	0.807059	0.692767	0.77734	0.745083	0.82271	0.779969	0.770821	-0.105014
cg21048700	chr2	189762162	189762163	+	0.013	0.62003	0.759797	0.709576	0.551209	0.734793	0.608239	0.663941	0.749687	0.757788	0.695812	0.781325	0.827233	0.813015	0.77081	-0.106869
cg21091841	chr13	34251239	34251240	+	0.027	0.42069	0.324927	0.397243	0.441548	0.526269	0.246696	0.392895	0.506563	0.56754	0.487376	0.437087	0.57697	0.410209	0.497624	-0.104729
cg21131239	chrX	74376811	74376812	-	0.027	0.247444	0.625072	0.360461	0.549157	0.404651	0.404289	0.431846	0.475328	0.563897	0.440503	0.64075	0.584177	0.71833	0.570497	-0.138652
cg21180572	chr9	33043903	33043904	+	0.003	0.266764	0.391975	0.246449	0.357384	0.260805	0.341339	0.310786	0.357986	0.471496	0.39356	0.581707	0.43589	0.378921	0.436593	-0.125807
cg21282282	chr1	109705170	109705171	-	0.006	0.477979	0.568577	0.639824	0.385505	0.603688	0.541539	0.536185	0.638284	0.657957	0.57937	0.643011	0.695559	0.733966	0.658025	-0.121839
cg21305774	chr6	17729087	17729088	+	0.006	0.967262	0.969811	0.537155	0.972335	0.959252	0.545268	0.82518	0.972273	0.970375	0.983287	0.969858	0.96972	0.973773	0.973214	-0.148034
cg21321372	chr4	141264456	141264457	-	0.013	0.772775	0.479038	0.759628	0.689619	0.831031	0.835088	0.727863	0.836959	0.889283	0.830354	0.874016	0.812392	0.882219	0.854204	-0.126341
cg21324402	chr6	31786808	31786809	-	0.017	0.612851	0.729754	0.643616	0.626698	0.467446	0.588887	0.611542	0.583695	0.745026	0.676853	0.755146	0.843742	0.813071	0.736255	-0.124713
cg21330896	chr8	28205705	28205706	+	0.017	0.337002	0.618954	0.452152	0.506725	0.640819	0.5328	0.514742	0.651901	0.604591	0.554192	0.720053	0.69925	0.622239	0.642038	-0.127296
cg21497739	chrX	154114271	154114272	+	0.003	0.472087	0.578774	0.502505	0.501918	0.617159	0.457412	0.521642	0.641442	0.637935	0.640529	0.554847	0.672456	0.644225	0.631906	-0.110263
cg21511321	chr7	1004997	1004998	+	0.012	0.496848	0.764337	0.563062	0.657828	0.57205	0.592027	0.607692	0.652112	0.752446	0.642768	0.78538	0.795053	0.754439	0.730366	-0.122674
cg21548813	chr6	291882	291883	-	0.007	0.533494	0.067321	0.0554868	0.0410701	0.507513	0.473431	0.279719	0.503949	0.510118	0.533315	0.518143	0.547849	0.550465	0.527306	-0.247587
cg21561807	chr13	112631608	112631609	+	0.007	0.670133	0.905363	0.711442	0.848375	0.839485	0.774495	0.791549	0.843725	0.921564	0.858763	0.970762	0.910225	0.962955	0.911332	-0.119783
cg21571166	chr3	147133884	147133885	+	0.015	0.642877	0.865306	0.712227	0.719988	0.82644	0.740132	0.751162	0.856578	0.821995	0.778897	0.884273	0.880921	0.887021	0.851614	-0.100452
cg21639713	chr3	147123123	147123124	+	0.004	0.580981	0.735753	0.613645	0.59791	0.66643	0.623158	0.636313	0.727182	0.72207	0.678342	0.806423	0.747338	0.745096	0.737742	-0.101429
cg21648914	chrX	69672831	69672832	-	0.025	0.622634	0.738681	0.655373	0.542761	0.747089	0.706131	0.668778	0.755424	0.777284	0.636328	0.824849	0.845179	0.783986	0.770508	-0.10173
cg21663666	chr2	232220549	232220550	+	0.005	0.481657	0.749211	0.584998	0.479081	0.678314	0.59351	0.594462	0.792168	0.741092	0.597919	0.841257	0.843362	0.783712	0.766585	-0.172123
cg21698310	chr17	48224718	48224719	-	0.01	0.345641	0.513308	0.408947	0.455033	0.52884	0.42843	0.4467	0.5221	0.541267	0.46387	0.611301	0.588095	0.55708	0.547286	-0.100586
cg21727359	chr6	82459006	82459007	-	0.027	0.630935	0.861762	0.613585	0.682029	0.69665	0.714234	0.699866	0.665084	0.836276	0.76374	0.859683	0.833426	0.864781	0.803832	-0.103966
cg21774338	chr1	50884242	50884243	-	0.04	0.318196	0.74811	0.278629	0.620342	0.62013	0.478663	0.510679	0.629048	0.736236	0.430287	0.689137	0.825467	0.781144	0.681887	-0.171208
cg21781979	chr13	100547292	100547293	+	0.035	0.378087	0.497637	0.339754	0.327604	0.326882	0.421455	0.381903	0.330358	0.487721	0.46898	0.449561	0.589023	0.587629	0.485545	-0.103642
cg21810373	chr11	70917159	70917160	+	0.034	0.651597	0.852024	0.436368	0.675309	0.752586	0.720672	0.681426	0.747827	0.786763	0.686362	0.900516	0.867318	0.876655	0.810907	-0.129481
cg21855021	chr6	131457506	131457507	+	0.042	0.235623	0.55451	0.296022	0.380657	0.50892	0.323511	0.383207	0.506326	0.48317	0.318861	0.510069	0.619404	0.625896	0.510621	-0.127414
cg21862992	chr11	68658383	68658384	+	0.017	0.489539	0.692635	0.513608	0.593573	0.571195	0.354021	0.535762	0.684556	0.618468	0.58517	0.655614	0.680769	0.660117	0.647449	-0.111687
cg21871883	chr21	34145043	34145044	-	0.023	0.497182	0.504505	0.469951	0.421902	0.37329	0.468443	0.455879	0.582628	0.497368	0.647081	0.646672	0.555447	0.411999	0.556866	-0.100987
cg21914290	chr1	170635960	170635961	-	0.049	0.429472	0.702218	0.52158	0.581167	0.488742	0.599276	0.553742	0.505279	0.607254	0.639061	0.788756	0.656522	0.78262	0.663249	-0.109506
cg21956434	chr19	17377697	17377698	+	0.004	0.443777	0.521463	0.382856	0.366967	0.386669	0.584644	0.447729	0.495474	0.604103	0.594384	0.61831	0.587334	0.628293	0.587983	-0.140254
cg21962115	chr4	2065749	2065750	-	0.034	0.680883	0.970335	0.715214	0.957435	0.792691	0.731122	0.807947	0.794091	0.955698	0.93096	0.966019	0.975054	0.972772	0.932432	-0.124486
cg21963583	chr11	68658836	68658837	-	0.026	0.494832	0.708435	0.532351	0.593594	0.561408	0.439579	0.555033	0.644317	0.606006	0.546518	0.758997	0.733309	0.716119	0.667544	-0.112511
cg22022797	chr19	5587909	5587910	+	0.03	0.474568	0.78771	0.538943	0.584016	0.669113	0.485269	0.589937	0.678447	0.711585	0.540674	0.789458	0.842141	0.858248	0.736759	-0.146822
cg22031964	chr11	62677251	62677252	-	0.016	0.698614	0.896942	0.693227	0.832672	0.725631	0.673326	0.753402	0.765983	0.891778	0.898742	0.904126	0.882684	0.897861	0.873529	-0.120127
cg22038359	chr21	46859045	46859046	-	0.04	0.447138	0.663157	0.535445	0.428896	0.623707	0.505149	0.533915	0.629215	0.609261	0.480029	0.739192	0.703587	0.696773	0.64301	-0.109095
cg22082456	chr1	53392538	53392539	+	0.021	0.501529	0.723052	0.594748	0.590622	0.611844	0.525264	0.591176	0.611349	0.734131	0.594347	0.789585	0.711305	0.72705	0.694628	-0.103451
cg22109795	chr1	210468650	210468651	+	0.035	0.640187	0.733633	0.544447	0.412246	0.664121	0.460071	0.575784	0.642617	0.668808	0.71398	0.669287	0.673927	0.760662	0.688214	-0.112429
cg22176709	chr3	193859889	193859890	+	0.01	0.51459	0.612869	0.600012	0.523247	0.660149	0.498112	0.568163	0.689503	0.710209	0.628472	0.764929	0.735726	0.576189	0.684171	-0.116008
cg22234930	chr15	72519739	72519740	+	0.005	0.620615	0.731395	0.668652	0.65848	0.678658	0.566302	0.654017	0.671795	0.761668	0.740359	0.823584	0.802051	0.75241	0.758644	-0.104627
cg22254463	chr11	108422663	108422664	+	0.023	0.683953	0.720014	0.68404	0.624549	0.77901	0.635472	0.68784	0.76768	0.818656	0.683615	0.725436	0.932927	0.880679	0.801499	-0.113659
cg22254983	chr8	136181389	136181390	-	0	0.517922	0.667939	0.568512	0.614334	0.643693	0.617319	0.604953	0.677143	0.722805	0.668775	0.754982	0.747172	0.674151	0.707505	-0.102552
cg22308726	chr19	4566575	4566576	+	0.039	0.6157	0.927223	0.638943	0.795741	0.763047	0.663043	0.73395	0.750713	0.877506	0.742335	0.93196	0.881908	0.934131	0.853092	-0.119143
cg22330763	chr6	44194767	44194768	-	0.003	0.747543	0.8965	0.779372	0.806096	0.795941	0.801509	0.804494	0.822813	0.92442	0.900218	0.965418	0.957722	0.946436	0.919504	-0.115011
cg22330875	chr7	25893749	25893750	+	0.038	0.667774	0.62081	0.646859	0.394622	0.77109	0.618037	0.619865	0.735607	0.640302	0.759495	0.630527	0.875241	0.81008	0.741875	-0.12201
cg22348290	chr8	72459499	72459500	+	0.004	0.620828	0.71306	0.681585	0.618869	0.715613	0.397785	0.624623	0.726179	0.78173	0.750397	0.650576	0.775729	0.778501	0.743852	-0.119229
cg22348992	chr20	61979563	61979564	+	0.033	0.528951	0.937269	0.621372	0.874622	0.924362	0.609456	0.749339	0.926659	0.91	0.759484	0.934244	0.940151	0.939857	0.901733	-0.152394
cg22352176	chr1	222987845	222987846	+	0.006	0.524195	0.688588	0.506282	0.746308	0.698544	0.664096	0.638002	0.689349	0.749852	0.770315	0.756788	0.828774	0.731007	0.754348	-0.116345
cg22360016	chr2	105276153	105276154	-	0.018	0.470028	0.71907	0.647274	0.566481	0.589596	0.637532	0.604997	0.651531	0.66743	0.794625	0.726167	0.636814	0.77815	0.70912	-0.104123
cg22374586	chr2	232220566	232220567	+	0.008	0.590308	0.754828	0.659706	0.56434	0.765031	0.657553	0.665294	0.826962	0.823173	0.70566	0.820327	0.870458	0.790556	0.806189	-0.140895
cg22382836	chr19	723036	723037	-	0.001	0.476101	0.50006	0.529297	0.40577	0.569431	0.541636	0.503716	0.592081	0.583884	0.579891	0.707413	0.613192	0.587968	0.610738	-0.107022
cg22395765	chr7	157362094	157362095	+	0.026	0.310625	0.569794	0.481339	0.457474	0.507612	0.431072	0.459653	0.610511	0.568707	0.425529	0.690595	0.631043	0.508842	0.572538	-0.112885
cg22400166	chr14	29242040	29242041	-	0.046	0.484907	0.685986	0.435412	0.535116	0.543869	0.540188	0.53758	0.615024	0.525181	0.547262	0.822495	0.783033	0.66926	0.660376	-0.122796
cg22476027	chr6	108492642	108492643	+	0	0.513218	0.610356	0.623584	0.673486	0.659586	0.641649	0.620313	0.754369	0.717898	0.729336	0.762244	0.735713	0.696314	0.732646	-0.112332
cg22482700	chr1	68594186	68594187	-	0.007	0.608556	0.636386	0.676527	0.633958	0.681354	0.574583	0.635227	0.705681	0.800321	0.642967	0.762666	0.806631	0.724645	0.740485	-0.105258
cg22522598	chr19	15360953	15360954	+	0.005	0.610344	0.56576	0.654153	0.511204	0.565362	0.52822	0.572507	0.624859	0.68046	0.699538	0.717438	0.701238	0.612514	0.672675	-0.100168
cg22524864	chr19	35613900	35613901	-	0.015	0.859473	0.781174	0.873214	0.686614	0.871879	0.739146	0.801917	0.901503	0.926611	0.819333	0.964615	0.950801	0.893531	0.909399	-0.107482
cg22535103	chr8	58192502	58192503	-	0	0.569152	0.744562	0.719537	0.724278	0.714541	0.744224	0.702716	0.828108	0.839177	0.767682	0.909759	0.791625	0.878791	0.835857	-0.133141
cg22546318	chr12	54070378	54070379	-	0.045	0.218538	0.550142	0.241544	0.39919	0.406892	0.339863	0.359361	0.381607	0.517282	0.332039	0.541105	0.507047	0.588289	0.477895	-0.118533
cg22610655	chr20	20346426	20346427	+	0.014	0.6553	0.754739	0.700359	0.68038	0.793798	0.744827	0.721567	0.829861	0.774825	0.721123	0.881545	0.902117	0.870697	0.830028	-0.108461
cg22620797	chr3	69061827	69061828	-	0.008	0.596523	0.686664	0.606277	0.619412	0.635489	0.561746	0.617685	0.630204	0.745737	0.668266	0.782224	0.779537	0.761036	0.727834	-0.110148
cg22785556	chr7	1081061	1081062	-	0.002	0.827512	0.896771	0.517163	0.468704	0.867676	0.787503	0.727555	0.888879	0.89104	0.930648	0.913661	0.902964	0.917518	0.907452	-0.179897
cg22841667	chr11	8705620	8705621	+	0.003	0.585807	0.670691	0.595591	0.590045	0.614928	0.562099	0.603194	0.684406	0.732371	0.596805	0.740364	0.762121	0.763272	0.713223	-0.11003
cg22870775	chr6	99277015	99277016	+	0.014	0.289264	0.506045	0.35308	0.38931	0.440715	0.381254	0.393278	0.461357	0.469066	0.405919	0.608561	0.590473	0.513077	0.508075	-0.114797
cg22900681	chr2	25301413	25301414	+	0.01	0.742896	0.840647	0.745697	0.764806	0.747873	0.697967	0.756648	0.769534	0.870307	0.813232	0.91776	0.925821	0.870071	0.861121	-0.104473
cg22955387	chrX	133680468	133680469	+	0.018	0.715064	0.662042	0.701379	0.780512	0.645735	0.718225	0.703826	0.67582	0.836688	0.896051	0.904157	0.84647	0.742489	0.816946	-0.11312
cg22969541	chrX	149736453	149736454	+	0.037	0.507231	0.736068	0.579577	0.649191	0.61273	0.616701	0.616917	0.720943	0.622278	0.568675	0.819093	0.860675	0.816462	0.734688	-0.117771
cg23015118	chr1	2232527	2232528	+	0.001	0.635023	0.46289	0.627192	0.653448	0.615218	0.65474	0.608085	0.684249	0.697123	0.720028	0.828419	0.744586	0.771901	0.741051	-0.132966
cg23020514	chr14	103360112	103360113	+	0.007	0.505157	0.625427	0.500404	0.506046	0.611015	0.506798	0.542474	0.583516	0.700668	0.708593	0.720571	0.577552	0.67614	0.661173	-0.118699
cg23032993	chr2	3128880	3128881	-	0.032	0.582575	0.90462	0.602793	0.635538	0.736991	0.60506	0.677929	0.839407	0.636799	0.733863	0.900519	0.950168	0.959481	0.836706	-0.158777
cg23065415	chr10	132099067	132099068	+	0.015	0.606666	0.804594	0.679228	0.826596	0.66007	0.718429	0.71593	0.817502	0.918969	0.774128	0.893652	0.945627	0.719489	0.844895	-0.128964
cg23074881	chr15	60872858	60872859	+	0.004	0.769208	0.869238	0.756419	0.741843	0.841352	0.71183	0.781649	0.854948	0.859444	0.860764	0.913578	0.922078	0.888471	0.883214	-0.101565
cg23090824	chr6	136173085	136173086	-	0.036	0.425496	0.574954	0.433276	0.540527	0.390355	0.491115	0.475954	0.465233	0.584938	0.42137	0.694181	0.748224	0.654028	0.594662	-0.118709
cg23108607	chr1	39879411	39879412	+	0.006	0.684717	0.792103	0.176972	0.761854	0.769779	0.699449	0.647479	0.772832	0.817379	0.813945	0.804916	0.781452	0.804954	0.799246	-0.151767
cg23122263	chr8	110656166	110656167	-	0.008	0.344037	0.495649	0.382136	0.292218	0.430997	0.408651	0.392281	0.452462	0.505394	0.419294	0.558412	0.569373	0.551058	0.509332	-0.117051
cg23146197	chr12	66271002	66271003	+	0.004	0.640492	0.733107	0.683729	0.627053	0.741404	0.60076	0.671091	0.764227	0.736731	0.716774	0.818213	0.81834	0.818081	0.778728	-0.107637
cg23175533	chr12	13196876	13196877	-	0.003	0.418663	0.58249	0.463949	0.476366	0.427464	0.448365	0.46955	0.597192	0.549707	0.63085	0.522301	0.659673	0.591983	0.591951	-0.122401
cg23180593	chr13	111301487	111301488	-	0.026	0.463589	0.309036	0.432854	0.42814	0.437132	0.404596	0.412558	0.314576	0.322454	0.370091	0.268187	0.293529	0.30562	0.31241	0.100148
cg23252815	chr20	44420276	44420277	-	0.046	0.110575	0.232261	0.0987211	0.272503	0.188705	0.202643	0.184235	0.167354	0.397667	0.119748	0.333591	0.395191	0.320644	0.289033	-0.104798
cg23263057	chr20	62949372	62949373	-	0.043	0.946014	0.354796	0.943295	0.918525	0.950576	0.929547	0.840459	0.960103	0.944075	0.942187	0.939679	0.959079	0.941866	0.947831	-0.107373
cg23324537	chr8	110656096	110656097	-	0.015	0.26624	0.431844	0.275171	0.245463	0.318751	0.32311	0.310097	0.37013	0.402267	0.278829	0.4292	0.490267	0.516301	0.414499	-0.104402
cg23345151	chr18	77292947	77292948	-	0.003	0.720354	0.605548	0.718421	0.683962	0.633671	0.575395	0.656225	0.777505	0.77036	0.708724	0.739288	0.775117	0.840413	0.768568	-0.112343
cg23473396	chrX	25041134	25041135	+	0.039	0.329428	0.571965	0.291565	0.392831	0.59763	0.313688	0.416185	0.624453	0.551211	0.32762	0.513078	0.818969	0.719196	0.592421	-0.176237
cg23505823	chr12	123215524	123215525	+	0.045	0.638515	0.809246	0.564634	0.604125	0.516996	0.579612	0.618855	0.502991	0.762828	0.715892	0.810699	0.834274	0.848587	0.745879	-0.127024
cg23554686	chrX	40122371	40122372	-	0.006	0.599322	0.765062	0.649246	0.623855	0.707789	0.649869	0.665857	0.74958	0.772843	0.698917	0.816982	0.84144	0.726849	0.767768	-0.101911
cg23584176	chr6	29365078	29365079	-	0.03	0.867054	0.589153	0.624678	0.573959	0.618214	0.592493	0.644258	0.84124	0.890881	0.660354	0.873559	0.63639	0.845898	0.791387	-0.147128
cg23601468	chr22	33200307	33200308	+	0.008	0.664951	0.813608	0.723422	0.669538	0.77818	0.598337	0.708006	0.801673	0.807444	0.789401	0.869688	0.881667	0.778941	0.821469	-0.113463
cg23628350	chr17	80561982	80561983	+	0.037	0.553872	0.868425	0.637431	0.740487	0.686497	0.633347	0.686677	0.733622	0.792908	0.703752	0.862541	0.79932	0.853329	0.790912	-0.104235
cg23671626	chr1	230837516	230837517	+	0.002	0.728854	0.727582	0.731906	0.772146	0.538145	0.659733	0.693061	0.777529	0.832478	0.781112	0.833062	0.822537	0.766663	0.80223	-0.109169
cg23676480	chr20	25039812	25039813	+	0.006	0.389234	0.550792	0.473339	0.390127	0.418037	0.592588	0.469019	0.603506	0.608569	0.514662	0.633628	0.606399	0.705261	0.612004	-0.142985
cg23739457	chr11	117314707	117314708	-	0.032	0.498349	0.66915	0.494248	0.458517	0.606918	0.479085	0.534378	0.762807	0.622212	0.462082	0.70474	0.708109	0.675329	0.65588	-0.121502
cg23832497	chr6	121655383	121655384	-	0.008	0.355486	0.539384	0.376891	0.455581	0.405315	0.405433	0.423015	0.483336	0.592286	0.474612	0.502573	0.612003	0.579027	0.540639	-0.117625
cg23866687	chr11	96026956	96026957	+	0.006	0.370996	0.504082	0.309592	0.360031	0.421296	0.368117	0.389019	0.47136	0.510013	0.37399	0.683318	0.673449	0.558357	0.545081	-0.156062
cg23882545	chr2	202122653	202122654	-	0.04	0.370264	0.654899	0.490109	0.520894	0.61437	0.388798	0.506556	0.596674	0.602871	0.481564	0.608821	0.697291	0.701651	0.614812	-0.108256
cg23910430	chr12	133353847	133353848	+	0.014	0.607886	0.887778	0.69929	0.683137	0.738868	0.683893	0.716809	0.757619	0.833675	0.765224	0.912989	0.890473	0.914179	0.845693	-0.128885
cg23928292	chr12	21815474	21815475	+	0.016	0.730501	0.934021	0.949879	0.921646	0.703206	0.716966	0.826037	0.942055	0.94897	0.929741	0.935084	0.953878	0.941179	0.941818	-0.115782
cg23936410	chr14	104808516	104808517	+	0.011	0.687516	0.499769	0.608584	0.656866	0.587127	0.547501	0.597894	0.773437	0.685496	0.783281	0.658123	0.685825	0.616815	0.700496	-0.102602
cg24036116	chr14	91281636	91281637	+	0.033	0.310068	0.28008	0.331848	0.320839	0.351709	0.200359	0.29915	0.301938	0.405479	0.345181	0.713133	0.360181	0.307875	0.405631	-0.106481
cg24040502	chr19	55477810	55477811	-	0.032	0.841073	0.791436	0.690387	0.485789	0.644909	0.714403	0.694666	0.82872	0.711948	0.760931	0.81755	0.895531	0.874522	0.814867	-0.120201
cg24055302	chr19	2099094	2099095	+	0.011	0.887033	0.761372	0.703327	0.789772	0.720512	0.708848	0.761811	0.954459	0.828365	0.849214	0.936885	0.769371	0.967907	0.884367	-0.122556
cg24090990	chr1	48452534	48452535	-	0.007	0.33826	0.426784	0.452208	0.367072	0.528664	0.397796	0.418464	0.49386	0.615648	0.475163	0.474186	0.583477	0.578857	0.536865	-0.118401
cg24129600	chr8	42395557	42395558	-	0.006	0.742119	0.869903	0.740118	0.720868	0.803048	0.750845	0.77115	0.817725	0.899148	0.857831	0.894593	0.860103	0.900644	0.871674	-0.100524
cg24152976	chr2	236100696	236100697	-	0.018	0.362819	0.514731	0.419092	0.345598	0.622166	0.446167	0.451762	0.660688	0.659152	0.4035	0.577542	0.902356	0.697299	0.65009	-0.198327
cg24167667	chr3	30482466	30482467	+	0.015	0.676298	0.744115	0.609652	0.547573	0.774253	0.717828	0.678287	0.805832	0.743765	0.713871	0.799785	0.844609	0.827288	0.789192	-0.110905
cg24202936	chr11	50257256	50257257	-	0.018	0.605967	0.462663	0.546225	0.469703	0.543682	0.39977	0.504668	0.639491	0.71936	0.596362	0.511857	0.575054	0.640502	0.613771	-0.109103
cg24212267	chr7	137801780	137801781	+	0.004	0.645536	0.622484	0.641498	0.631502	0.656754	0.614653	0.635405	0.63113	0.853636	0.683751	0.657035	0.826774	0.799983	0.742051	-0.106647
cg24213669	chr2	118616576	118616577	-	0.005	0.594693	0.411263	0.538697	0.483699	0.636597	0.526608	0.531926	0.685037	0.607238	0.786184	0.563874	0.749374	0.627009	0.669786	-0.137859
cg24216770	chr20	35091947	35091948	+	0.004	0.619352	0.726197	0.608108	0.643428	0.650614	0.602797	0.641749	0.701536	0.796021	0.693071	0.784593	0.801229	0.71245	0.74815	-0.106401
cg24331317	chr3	19017607	19017608	-	0.017	0.447203	0.777499	0.752546	0.706463	0.807802	0.742291	0.705634	0.755874	0.825943	0.86884	0.782918	0.881239	0.794037	0.818142	-0.112508
cg24341129	chr9	16727830	16727831	+	0.03	0.591773	0.702243	0.582033	0.513305	0.60371	0.49792	0.581831	0.61903	0.606934	0.598273	0.697847	0.765895	0.818063	0.68434	-0.10251
cg24360197	chr15	66662775	66662776	-	0.042	0.145492	0.235791	0.212285	0.138427	0.370486	0.218514	0.220166	0.427578	0.295765	0.134868	0.309282	0.440224	0.401192	0.334818	-0.114653
cg24365896	chr11	69974745	69974746	-	0.015	0.648892	0.806618	0.643837	0.666818	0.765837	0.665354	0.699559	0.733172	0.827083	0.733036	0.822534	0.852208	0.897481	0.810919	-0.11136
cg24377694	chr20	1975372	1975373	-	0.028	0.490644	0.593034	0.47095	0.550922	0.578358	0.422303	0.517702	0.627259	0.50106	0.521218	0.598031	0.827179	0.858717	0.655577	-0.137876
cg24441899	chr7	4244372	4244373	+	0.003	0.544674	0.674858	0.554453	0.492871	0.563964	0.495347	0.554361	0.574838	0.699155	0.702678	0.675373	0.739616	0.742983	0.689107	-0.134746
cg24448840	chr6	30539883	30539884	+	0.009	0.217785	0.226525	0.146302	0.202216	0.156032	0.193078	0.190323	0.146669	0.311541	0.33834	0.26888	0.513639	0.285538	0.310768	-0.120445
cg24452181	chr19	48984318	48984319	-	0.011	0.229554	0.320533	0.206151	0.35162	0.34902	0.252044	0.28482	0.341374	0.392182	0.302812	0.542856	0.349627	0.396973	0.387637	-0.102817
cg24501872	chr1	7562444	7562445	+	0.004	0.584148	0.732948	0.608871	0.574546	0.718109	0.617385	0.639334	0.721371	0.755606	0.701702	0.754147	0.752978	0.812793	0.749766	-0.110432
cg24519108	chr8	6421063	6421064	+	0.003	0.594973	0.704899	0.633225	0.566671	0.612237	0.636053	0.624676	0.789608	0.711181	0.640384	0.78586	0.770237	0.825874	0.753857	-0.129181
cg24565274	chr11	19736253	19736254	-	0.011	0.347585	0.562232	0.441184	0.526719	0.562095	0.483493	0.487218	0.517454	0.619668	0.514928	0.729269	0.700807	0.65894	0.623511	-0.136293
cg24571110	chr17	80921117	80921118	-	0.045	0.14876	0.247115	0.13941	0.360451	0.379657	0.178746	0.242356	0.34995	0.187172	0.459065	0.39817	0.388792	0.289706	0.345476	-0.103119
cg24579589	chr1	235256910	235256911	+	0.037	0.301214	0.519731	0.301508	0.360628	0.504825	0.351858	0.389961	0.474305	0.415087	0.363553	0.566841	0.601033	0.601973	0.503799	-0.113838
cg24581462	chr8	38759627	38759628	-	0.033	0.805081	0.732808	0.781186	0.732088	0.785131	0.751352	0.764608	0.660968	0.735258	0.713039	0.549336	0.522292	0.681233	0.643688	0.12092
cg24684807	chr6	99273830	99273831	+	0.011	0.458048	0.60425	0.50589	0.511055	0.584375	0.474233	0.522975	0.573424	0.647472	0.533687	0.702461	0.675051	0.638665	0.62846	-0.105485
cg24696067	chr7	1881390	1881391	+	0.001	0.908518	0.681572	0.911664	0.896548	0.572697	0.906787	0.812965	0.93384	0.922095	0.937205	0.912848	0.915451	0.91081	0.922042	-0.109077
cg24702341	chr7	73895278	73895279	-	0.007	0.385524	0.628727	0.546199	0.604293	0.681935	0.506232	0.558818	0.715736	0.69251	0.609945	0.730065	0.756087	0.635521	0.689977	-0.131159
cg24726783	chr10	29759454	29759455	+	0.007	0.795655	0.928121	0.832675	0.715145	0.76431	0.857419	0.815554	0.884885	0.929621	0.924393	0.938252	0.909509	0.949294	0.922659	-0.107105
cg24761195	chr6	150184345	150184346	-	0.041	0.0251674	0.042288	0.056182	0.0371994	0.0356731	0.0502304	0.0411234	0.0451285	0.065857	0.0430154	0.0446037	0.90286	0.0528367	0.192383	-0.15126
cg24791666	chr3	39192215	39192216	+	0.006	0.583194	0.730411	0.61527	0.559038	0.644241	0.610678	0.623805	0.687845	0.721115	0.706613	0.721718	0.761062	0.765279	0.727272	-0.103467
cg24811290	chr4	159092553	159092554	+	0.03	0.462655	0.769681	0.526806	0.606524	0.631281	0.490894	0.581307	0.689179	0.680146	0.542115	0.795107	0.7678	0.734202	0.701425	-0.120118
cg24829409	chr8	58192753	58192754	-	0	0.473008	0.608374	0.579707	0.563182	0.575779	0.628786	0.571473	0.685714	0.722833	0.643695	0.801231	0.656592	0.737634	0.70795	-0.136477
cg24856658	chr5	78533917	78533918	-	0.005	0.56084	0.621703	0.643123	0.658485	0.642823	0.549153	0.612688	0.606365	0.738466	0.739292	0.746478	0.703411	0.779688	0.71895	-0.106262
cg24930416	chr2	201390305	201390306	+	0.015	0.477305	0.626227	0.450017	0.491034	0.462895	0.458781	0.494377	0.583749	0.509654	0.627809	0.520596	0.61684	0.762343	0.603499	-0.109122
cg24944328	chr3	184283308	184283309	+	0.003	0.502638	0.674674	0.577586	0.671272	0.715433	0.601972	0.623929	0.714889	0.738564	0.704074	0.72958	0.78375	0.690463	0.726886	-0.102957
cg24945462	chr21	46714985	46714986	+	0.017	0.708248	0.901754	0.718161	0.657971	0.736156	0.822177	0.757411	0.76715	0.876307	0.83598	0.896506	0.875998	0.921957	0.862317	-0.104905
cg24953078	chr11	131878924	131878925	+	0.017	0.638222	0.743438	0.724505	0.665807	0.834046	0.611531	0.702925	0.814475	0.81047	0.733575	0.821622	0.857068	0.789034	0.804374	-0.101449
cg24998527	chr1	42611607	42611608	+	0.025	0.755192	0.648228	0.729446	0.636021	0.840764	0.796441	0.734349	0.842737	0.795313	0.883996	0.710343	0.886691	0.897335	0.836069	-0.10172
cg25002649	chr6	43022044	43022045	+	0.025	0.580344	0.785432	0.622467	0.70265	0.722684	0.601237	0.669136	0.692768	0.782173	0.684144	0.804173	0.817035	0.870911	0.775201	-0.106065
cg25017620	chr1	247802802	247802803	-	0.023	0.138579	0.255376	0.025866	0.193362	0.187124	0.208139	0.168074	0.292855	0.277511	0.105648	0.290103	0.347406	0.333143	0.274444	-0.10637
cg25019503	chr11	44052211	44052212	+	0.025	0.471124	0.634496	0.671366	0.463408	0.639976	0.543033	0.570567	0.682109	0.594798	0.632575	0.725754	0.737429	0.665098	0.67296	-0.102393
cg25032321	chr13	99227533	99227534	-	0.007	0.597531	0.701854	0.563467	0.616962	0.608658	0.53507	0.603924	0.687055	0.739328	0.600692	0.780426	0.703108	0.751994	0.710434	-0.10651
cg25069807	chr17	76171191	76171192	+	0.031	0.704193	0.92384	0.620517	0.691128	0.783712	0.723968	0.741226	0.785481	0.813031	0.787225	0.942348	0.915671	0.874385	0.853024	-0.111797
cg25108548	chr12	13196954	13196955	+	0.006	0.0709808	0.130496	0.0611389	0.0921263	0.0679527	0.0872267	0.0849869	0.512948	0.0940294	0.392923	0.086905	0.481406	0.144	0.285368	-0.200382
cg25150519	chr12	98850993	98850994	+	0.017	0.0408808	0.0248141	0.0231271	0.0294406	0.034331	0.0264765	0.029845	0.358399	0.0298137	0.33965	0.315382	0.110136	0.0264312	0.196635	-0.16679
cg25152404	chr1	225999183	225999184	+	0.017	0.677804	0.841209	0.682456	0.644783	0.789445	0.630663	0.71106	0.772958	0.811364	0.747877	0.865041	0.866855	0.871615	0.822618	-0.111558
cg25279586	chr18	7566258	7566259	-	0.011	0.596368	0.697384	0.61232	0.565304	0.643044	0.605125	0.619924	0.606424	0.774987	0.731344	0.793162	0.765924	0.68414	0.725997	-0.106073
cg25279739	chr1	3500469	3500470	+	0.018	0.722747	0.810237	0.742111	0.686368	0.847242	0.602185	0.735148	0.85468	0.816695	0.746647	0.841047	0.898203	0.90528	0.843759	-0.10861
cg25303023	chr6	169301413	169301414	+	0.023	0.659025	0.871356	0.643618	0.721195	0.708136	0.623049	0.704397	0.724915	0.816373	0.728458	0.858749	0.899887	0.863307	0.815282	-0.110885
cg25389145	chr8	141220490	141220491	-	0.034	0.468551	0.65764	0.563565	0.53389	0.665656	0.46991	0.559869	0.687725	0.638744	0.520306	0.636839	0.766356	0.771046	0.670169	-0.110301
cg25444339	chr7	75194698	75194699	-	0.006	0.577933	0.661891	0.626773	0.574443	0.651238	0.514371	0.601108	0.705506	0.70084	0.649422	0.769226	0.774335	0.639132	0.70641	-0.105302
cg25449484	chr5	92929372	92929373	+	0.047	0.529315	0.833822	0.554317	0.609652	0.688268	0.60808	0.637242	0.748353	0.708049	0.558119	0.863402	0.822709	0.846402	0.757839	-0.120597
cg25467336	chr7	2757616	2757617	-	0.02	0.530271	0.884361	0.634168	0.721864	0.724762	0.709562	0.700831	0.770278	0.759489	0.780381	0.914477	0.865701	0.91432	0.834108	-0.133276
cg25477606	chr2	55458422	55458423	+	0.007	0.623615	0.62923	0.71654	0.593386	0.66404	0.549965	0.629463	0.706143	0.734328	0.641876	0.734137	0.807658	0.778235	0.733729	-0.104267
cg25495534	chr10	65431222	65431223	-	0.002	0.548585	0.787124	0.68591	0.730265	0.802317	0.67699	0.705198	0.837996	0.817331	0.78347	0.85667	0.876196	0.82677	0.833072	-0.127874
cg25545503	chr6	160680162	160680163	+	0.037	0.715104	0.890888	0.693324	0.664118	0.819906	0.736899	0.753373	0.720818	0.810075	0.863225	0.92126	0.911771	0.930109	0.859543	-0.10617
cg25620901	chr7	808592	808593	-	0.004	0.435634	0.807673	0.539848	0.615528	0.681253	0.576581	0.609419	0.692287	0.821897	0.777534	0.894056	0.915632	0.946814	0.84137	-0.231951
cg25642917	chr11	131779604	131779605	+	0.013	0.506206	0.763445	0.585904	0.655002	0.680516	0.612699	0.633962	0.696168	0.761284	0.648343	0.752336	0.799561	0.80467	0.743727	-0.109765
cg25651476	chr19	55476717	55476718	-	0.03	0.800682	0.766414	0.721634	0.45554	0.631795	0.650502	0.671094	0.795952	0.717838	0.726646	0.777343	0.827951	0.809141	0.775812	-0.104717
cg25730564	chr2	236100751	236100752	+	0.01	0.483812	0.695441	0.52353	0.559593	0.76671	0.559285	0.598062	0.773345	0.797795	0.577577	0.774147	0.960556	0.783146	0.777761	-0.1797
cg25748136	chr17	63555464	63555465	-	0.028	0.212913	0.405448	0.304875	0.265621	0.347791	0.317767	0.309069	0.310128	0.388061	0.312352	0.466543	0.538748	0.551076	0.427818	-0.118749
cg25748441	chr2	202122587	202122588	+	0.017	0.497818	0.73245	0.536753	0.611334	0.695486	0.532033	0.600979	0.644198	0.767441	0.650564	0.746715	0.776381	0.796974	0.730379	-0.1294
cg25751787	chr11	31847880	31847881	-	0.005	0.53862	0.617244	0.57175	0.482333	0.50115	0.513983	0.537513	0.584105	0.593219	0.607199	0.576405	0.736943	0.747252	0.640854	-0.10334
cg25781936	chr6	138750887	138750888	-	0.004	0.548378	0.72647	0.571849	0.602665	0.706189	0.621122	0.629445	0.733157	0.74137	0.681789	0.726366	0.735632	0.767022	0.730889	-0.101444
cg25801976	chr8	48648112	48648113	+	0.008	0.548465	0.707999	0.608019	0.601573	0.690317	0.550825	0.617866	0.711477	0.731097	0.629643	0.782004	0.772116	0.703256	0.721599	-0.103733
cg25823926	chr12	94153360	94153361	-	0	0.708866	0.784181	0.771205	0.726286	0.797575	0.668766	0.742813	0.825643	0.862777	0.790709	0.884437	0.905208	0.805656	0.845738	-0.102925
cg25900085	chr8	65291513	65291514	+	0.046	0.565744	0.853978	0.514849	0.636255	0.554193	0.728969	0.642331	0.657724	0.686538	0.715386	0.829144	0.848713	0.862667	0.766695	-0.124364
cg26021960	chr3	147140297	147140298	-	0.012	0.46318	0.687512	0.449588	0.486412	0.646124	0.51903	0.541974	0.66688	0.645558	0.558616	0.812968	0.674093	0.682467	0.67343	-0.131456
cg26035105	chr2	121105464	121105465	-	0.013	0.328067	0.471097	0.344114	0.381452	0.515674	0.422787	0.410532	0.478678	0.526455	0.416922	0.604449	0.555025	0.547043	0.521429	-0.110897
cg26052586	chr18	20717411	20717412	+	0.034	0.546231	0.839454	0.544743	0.700246	0.631205	0.632402	0.649047	0.674692	0.724509	0.689404	0.83076	0.829834	0.79994	0.75819	-0.109143
cg26109154	chr1	245411604	245411605	+	0.02	0.711503	0.953629	0.720691	0.946658	0.812875	0.810165	0.82592	0.85714	0.949911	0.95289	0.958075	0.938339	0.955298	0.935276	-0.109356
cg26154534	chr2	241076355	241076356	+	0.01	0.464329	0.53294	0.311203	0.420385	0.407959	0.45144	0.431376	0.509737	0.561558	0.40739	0.679511	0.660772	0.688737	0.584617	-0.153241
cg26218110	chr17	79375254	79375255	+	0	0.56577	0.670152	0.636905	0.681731	0.637969	0.592609	0.630856	0.713308	0.684443	0.696661	0.794499	0.79433	0.744003	0.737874	-0.107018
cg26224354	chr7	1096374	1096375	+	0.019	0.740485	0.934267	0.64112	0.724128	0.812529	0.814052	0.777763	0.801286	0.866969	0.867921	0.94432	0.950905	0.897875	0.888213	-0.110449
cg26224785	chr3	147122315	147122316	+	0.008	0.589067	0.739363	0.623357	0.578124	0.718095	0.653189	0.650199	0.753836	0.719702	0.671017	0.828172	0.771289	0.79707	0.756848	-0.106649
cg26277026	chr12	22486029	22486030	+	0.006	0.514872	0.752691	0.477571	0.694343	0.756885	0.62917	0.637589	0.707983	0.759981	0.78667	0.826308	0.829424	0.806583	0.786158	-0.14857
cg26325723	chr20	25039792	25039793	+	0.02	0.218775	0.285931	0.232027	0.150281	0.19642	0.355433	0.239811	0.333765	0.351945	0.18642	0.367371	0.412734	0.397057	0.341549	-0.101738
cg26403843	chr5	158634085	158634086	-	0.007	0.445679	0.494337	0.548852	0.475889	0.510716	0.435233	0.485118	0.588295	0.643658	0.462359	0.686516	0.638577	0.583079	0.600414	-0.115296
cg26445779	chrX	9860732	9860733	+	0.018	0.56121	0.564294	0.592021	0.522483	0.0308825	0.534712	0.4676	0.570246	0.574463	0.621653	0.573361	0.615739	0.55827	0.585622	-0.118022
cg26458748	chr2	37962248	37962249	-	0.03	0.653061	0.578821	0.545711	0.507844	0.717284	0.501706	0.584071	0.802469	0.538375	0.681682	0.647921	0.808052	0.726935	0.700906	-0.116835
cg26476156	chr10	46090807	46090808	-	0.01	0.503346	0.683472	0.562587	0.557217	0.603752	0.573905	0.580713	0.594749	0.734838	0.595377	0.749869	0.788294	0.749503	0.702105	-0.121392
cg26502852	chr17	6659199	6659200	-	0.008	0.565626	0.744498	0.593275	0.516732	0.702247	0.646383	0.628127	0.705813	0.72276	0.661118	0.789512	0.776879	0.798395	0.742413	-0.114286
cg26539455	chr6	31786772	31786773	+	0.05	0.328213	0.50924	0.291165	0.337736	0.375275	0.365449	0.367847	0.250372	0.502691	0.396147	0.531788	0.698913	0.675043	0.509159	-0.141312
cg26540191	chr4	3475093	3475094	+	0.009	0.623485	0.843398	0.677364	0.676102	0.751789	0.710939	0.713846	0.774894	0.885514	0.746596	0.944798	0.926778	0.922165	0.866791	-0.152945
cg26564117	chr22	28249567	28249568	-	0.02	0.692157	0.8526	0.467692	0.792429	0.817268	0.745198	0.727891	0.78064	0.848433	0.842136	0.866341	0.82278	0.849167	0.834916	-0.107026
cg26580869	chr19	611506	611507	-	0.022	0.646401	0.873268	0.544428	0.735037	0.616273	0.601335	0.669457	0.652616	0.841733	0.78011	0.865662	0.854954	0.832854	0.804655	-0.135198
cg26597838	chr10	835615	835616	-	0.037	0.212315	0.15371	0.170739	0.176723	0.359924	0.178151	0.208594	0.359379	0.22881	0.112426	0.589277	0.770069	0.53825	0.433035	-0.224441
cg26651775	chr16	764420	764421	+	0.005	0.652469	0.753263	0.696172	0.739888	0.68409	0.637238	0.693853	0.701955	0.813121	0.795035	0.836179	0.84794	0.777123	0.795226	-0.101372
cg26656258	chr4	54969688	54969689	-	0.047	0.332096	0.4282	0.490559	0.322327	0.491395	0.36724	0.405303	0.445244	0.403597	0.661205	0.490432	0.616933	0.448204	0.510936	-0.105633
cg26683259	chr5	77943417	77943418	+	0.005	0.428456	0.65336	0.46373	0.480653	0.600775	0.51729	0.524044	0.674542	0.64006	0.559304	0.619278	0.69161	0.732396	0.652865	-0.128821
cg26723054	chr16	85650522	85650523	+	0.013	0.486716	0.637048	0.566402	0.57848	0.66743	0.571795	0.584645	0.651546	0.684794	0.575379	0.737383	0.722868	0.736445	0.684736	-0.100091
cg26723707	chr7	142045216	142045217	+	0.03	0.480592	0.523524	0.5047	0.38076	0.731827	0.473279	0.51578	0.723096	0.649679	0.490887	0.676237	0.729206	0.750689	0.669966	-0.154185
cg26727768	chr15	37178201	37178202	-	0.025	0.515677	0.710568	0.456705	0.600418	0.610361	0.510625	0.567392	0.647179	0.746512	0.502834	0.834988	0.783276	0.703368	0.703026	-0.135634
cg26739149	chr17	78997350	78997351	+	0.005	0.784257	0.895079	0.772673	0.828766	0.663019	0.75955	0.783891	0.797625	0.889624	0.904209	0.929877	0.902837	0.928533	0.892117	-0.108227
cg26835374	chr1	142618826	142618827	-	0.018	0.764637	0.502884	0.661284	0.60107	0.616444	0.704303	0.641771	0.737082	0.845846	0.866503	0.713406	0.669687	0.809236	0.773627	-0.131856
cg26851570	chr2	4600947	4600948	-	0.035	0.617568	0.851629	0.669852	0.74572	0.746869	0.691337	0.720496	0.767312	0.751395	0.70949	0.889276	0.90996	0.904599	0.822005	-0.10151
cg26876444	chr1	65887413	65887414	+	0.036	0.348057	0.659964	0.273598	0.449986	0.454292	0.487104	0.4455	0.530761	0.559607	0.41904	0.596446	0.660606	0.619529	0.564331	-0.118831
cg26878688	chr19	11308876	11308877	-	0.038	0.69869	0.699197	0.665415	0.693785	0.794324	0.669221	0.703439	0.56291	0.506826	0.557162	0.716532	0.567232	0.664624	0.595881	0.107558
cg26900686	chr16	49802060	49802061	+	0.031	0.577797	0.860651	0.701154	0.697579	0.864637	0.635816	0.722939	0.806911	0.883985	0.766776	0.857185	0.886089	0.829874	0.83847	-0.115531
cg26924747	chr7	127984319	127984320	+	0.01	0.407211	0.437507	0.268055	0.391246	0.35722	0.349586	0.368471	0.398348	0.546922	0.371941	0.486339	0.521449	0.509875	0.472479	-0.104008
cg26960322	chr2	237479015	237479016	+	0.008	0.600155	0.669267	0.609215	0.524682	0.702168	0.596794	0.617047	0.718306	0.793836	0.736208	0.832054	0.839922	0.638475	0.7598	-0.142753
cg26971042	chr15	70387217	70387218	-	0.01	0.481743	0.646832	0.55369	0.567861	0.656609	0.592582	0.58322	0.647658	0.650885	0.618628	0.769557	0.774646	0.668447	0.688304	-0.105084
cg27034836	chr3	33139098	33139099	-	0.017	0.320718	0.37106	0.272603	0.342702	0.440998	0.427516	0.3626	0.354823	0.413169	0.418323	0.515177	0.533008	0.57082	0.467553	-0.104954
cg27084028	chr7	6836436	6836437	-	0.033	0.0504699	0.0493695	0.0521459	0.0533169	0.642935	0.0425379	0.148463	0.0513171	0.795312	0.649789	0.61741	0.657238	0.0639172	0.472497	-0.324035
cg27100370	chr19	1082612	1082613	-	0.006	0.720087	0.726609	0.683339	0.785713	0.723511	0.501442	0.690117	0.773608	0.740685	0.784305	0.735435	0.814155	0.896177	0.790727	-0.10061
cg27107685	chr7	30590918	30590919	+	0.007	0.407869	0.543999	0.501032	0.482004	0.468857	0.470607	0.479061	0.529661	0.622627	0.499672	0.638072	0.625573	0.605295	0.586817	-0.107755
cg27167221	chr1	7103111	7103112	-	0.007	0.619671	0.638754	0.482655	0.651044	0.530147	0.598957	0.586871	0.655244	0.597506	0.816318	0.723104	0.712561	0.653301	0.693006	-0.106134
cg27176264	chr17	81060149	81060150	+	0.005	0.66521	0.920547	0.532452	0.888959	0.924252	0.895661	0.804513	0.950722	0.935038	0.938283	0.91771	0.925644	0.918545	0.930991	-0.126477
cg27182476	chr3	117717026	117717027	+	0.038	0.549721	0.691375	0.394077	0.570392	0.592233	0.536586	0.555731	0.588442	0.640053	0.5938	0.784181	0.777084	0.625238	0.668133	-0.112402
cg27193080	chr3	129160612	129160613	-	0.011	0.606057	0.746697	0.639447	0.600782	0.671873	0.648641	0.65225	0.665765	0.732224	0.73735	0.833109	0.793713	0.845219	0.767897	-0.115647
cg27214687	chr2	241383517	241383518	+	0.021	0.665007	0.808547	0.721074	0.733834	0.858488	0.668641	0.742598	0.84589	0.86356	0.753247	0.923611	0.87591	0.801873	0.844015	-0.101417
cg27228986	chr2	179897289	179897290	+	0.009	0.615599	0.761223	0.584313	0.565602	0.645852	0.636664	0.634876	0.685861	0.736541	0.652003	0.8045	0.805014	0.779351	0.743878	-0.109003
cg27244482	chr5	149669488	149669489	+	0.008	0.630822	0.706981	0.718149	0.663173	0.654058	0.623202	0.666064	0.664755	0.724811	0.762423	0.825951	0.827433	0.795429	0.7668	-0.100736
cg27274426	chr2	86791087	86791088	+	0.003	0.462638	0.440256	0.328735	0.434446	0.565802	0.389809	0.436948	0.538673	0.549631	0.573185	0.576159	0.592732	0.590571	0.570158	-0.133211
cg27278294	chrX	149736594	149736595	-	0.043	0.561009	0.872713	0.56998	0.69213	0.701021	0.700865	0.682953	0.765837	0.728204	0.650413	0.918037	0.864173	0.891788	0.803075	-0.120122
cg27280535	chr8	8746679	8746680	-	0.008	0.585852	0.70248	0.638015	0.632717	0.640163	0.562676	0.626984	0.679897	0.736742	0.649511	0.811895	0.82195	0.70023	0.733371	-0.106387
cg27281559	chrX	145701263	145701264	+	0.02	0.77758	0.810388	0.622385	0.674546	0.575591	0.601987	0.677079	0.792972	0.806713	0.805786	0.690848	0.912824	0.87606	0.814201	-0.137121
cg27315157	chr1	79086197	79086198	-	0.043	0.315847	0.499508	0.36086	0.42008	0.567068	0.450779	0.43569	0.499418	0.516265	0.405725	0.6222	0.626699	0.556097	0.537734	-0.102044
cg27400746	chr16	89904261	89904262	+	0.004	0.605728	0.702654	0.459816	0.446615	0.456979	0.417987	0.514963	0.676286	0.664209	0.67322	0.701129	0.70941	0.719289	0.690591	-0.175627
cg27520536	chr16	54228323	54228324	-	0.023	0.650037	0.618458	0.591854	0.56558	0.677857	0.549942	0.608955	0.769546	0.535445	0.645822	0.727151	0.813097	0.810623	0.716947	-0.107993
cg27543040	chr1	247802703	247802704	-	0.008	0.449989	0.503196	0.303604	0.444312	0.453453	0.482991	0.439591	0.580601	0.57727	0.394799	0.574464	0.652097	0.637588	0.56947	-0.129879
cg27545407	chr16	86775296	86775297	+	0.038	0.366371	0.698433	0.445334	0.405917	0.577082	0.495508	0.498107	0.673932	0.539684	0.528955	0.54071	0.727103	0.6763	0.614447	-0.11634
cg27570984	chr16	55125644	55125645	+	0.027	0.603596	0.946201	0.604572	0.723738	0.773057	0.623015	0.712363	0.79934	0.836898	0.735372	0.931019	0.910885	0.957488	0.861834	-0.149471
cg27608563	chr16	81518041	81518042	-	0.008	0.679841	0.867741	0.762279	0.872143	0.789902	0.743275	0.785864	0.825687	0.894471	0.817075	0.897659	0.964323	0.946479	0.890949	-0.105086
cg27644715	chr11	131779583	131779584	+	0.01	0.567536	0.847505	0.65362	0.728801	0.77005	0.686914	0.709071	0.793622	0.811025	0.749798	0.866366	0.86489	0.886767	0.828745	-0.119674

## Sheet: Old DML
ID	Chromosome	Start	End	Strand	pperm_old[which(pperm_old <= 0.05)]	X9305216040_R02C01	X9305216040_R04C01	X9305216040_R06C01	X9305216040_R02C02	X9305216040_R04C02	X9305216040_R06C02		X9305216040_R03C01	X9305216040_R05C01	X9305216040_R03C02	X9305216040_R05C02	X9373550079_R06C02	X9426020146_R06C02		Delta Beta
cg27606473	chr2	217205778	217205779	+	0.003	0.303416	0.436912	0.3978	0.344447	0.402118	0.306978	0.365279	0.500549	0.467199	0.407623	0.436379	0.526082	0.520581	0.476402	-0.111124
cg11337462	chrX	74377604	74377605	+	0.035	0.527892	0.710567	0.504506	0.803594	0.600228	0.448999	0.599298	0.686963	0.791542	0.615735	0.714221	0.867178	0.844025	0.753277	-0.153979
cg03393602	chr18	19285336	19285337	+	0.038	0.800433	0.581475	0.648043	0.707915	0.676971	0.73821	0.692174	0.634233	0.480806	0.659863	0.52591	0.499944	0.530084	0.55514	0.137034
cg01621764	chr19	8809175	8809176	+	0.039	0.441764	0.518628	0.446041	0.465398	0.470019	0.517133	0.476497	0.302725	0.380662	0.29585	0.454552	0.40935	0.389001	0.372023	0.104474
cg02825211	chr19	8808663	8808664	-	0.039	0.284496	0.298169	0.230375	0.240611	0.291323	0.392833	0.289635	0.14388	0.140644	0.122823	0.170717	0.11502	0.151373	0.140743	0.148892
cg21569398	chr5	33855241	33855242	+	0.002	0.187621	0.382757	0.213659	0.286397	0.336282	0.188317	0.265839	0.446401	0.387906	0.392199	0.365854	0.431433	0.376423	0.400036	-0.134197
cg12378867	chr5	7827486	7827487	+	0.01	0.221213	0.403531	0.341803	0.39862	0.309806	0.235966	0.31849	0.443669	0.476644	0.346459	0.395708	0.593419	0.492789	0.458115	-0.139625
cg21011133	chr2	25142198	25142199	+	0.044	0.199309	0.373181	0.117709	0.334562	0.408647	0.185557	0.269828	0.422223	0.372366	0.198505	0.505668	0.649393	0.338874	0.414505	-0.144677
cg10140309	chr20	49548661	49548662	-	0.048	0.744175	0.617504	0.685262	0.828338	0.745888	0.662487	0.713942	0.645468	0.509648	0.678018	0.607003	0.488313	0.533012	0.57691	0.137032
cg09506001	chr1	36559506	36559507	-	0.039	0.0744838	0.402072	0.135904	0.256191	0.22082	0.161698	0.208528	0.434869	0.296631	0.187503	0.273602	0.376517	0.39685	0.327662	-0.119134
cg13044136	chr19	3062883	3062884	+	0.027	0.196833	0.098966	0.108703	0.238077	0.150541	0.120089	0.152202	0.331994	0.316799	0.366198	0.281377	0.0789444	0.174391	0.258284	-0.106082
cg13353679	chr2	100720179	100720180	-	0.011	0.0715966	0.222129	0.0901206	0.0868377	0.116896	0.0814981	0.111513	0.203098	0.102215	0.207798	0.393283	0.268737	0.246423	0.236926	-0.125413
cg02638523	chr2	236548728	236548729	-	0.049	0.455484	0.63102	0.43061	0.683846	0.52738	0.469768	0.533018	0.678926	0.576883	0.528846	0.689144	0.66454	0.675939	0.635713	-0.102695
cg01834979	chr12	58119918	58119919	+	0.024	0.187829	0.460983	0.276137	0.399123	0.345043	0.274263	0.323896	0.449254	0.358317	0.390596	0.483755	0.460978	0.431507	0.429068	-0.105172
cg11511175	chr12	58119979	58119980	-	0.012	0.181231	0.40498	0.196592	0.29515	0.264702	0.223173	0.260971	0.3542	0.321363	0.379334	0.433825	0.392648	0.325939	0.367885	-0.106914
cg16823042	chr12	58119992	58119993	-	0.01	0.0391649	0.237652	0.109921	0.119449	0.217711	0.148582	0.145413	0.225441	0.20423	0.236142	0.311086	0.264753	0.232673	0.245721	-0.100307
cg21546950	chr1	77904032	77904033	+	0.032	0.148765	0.459234	0.265183	0.377123	0.27722	0.295831	0.303893	0.422753	0.449556	0.300773	0.430666	0.389954	0.433025	0.404454	-0.100562
cg13640414	chr19	15530870	15530871	+	0.017	0.557472	0.536863	0.53468	0.630427	0.514837	0.608472	0.563792	0.466534	0.49446	0.547539	0.425593	0.446374	0.391133	0.461939	0.101853
cg00061551	chr16	5121151	5121152	+	0	0.474857	0.551445	0.534725	0.493537	0.541194	0.531714	0.521245	0.908078	0.578949	0.927214	0.584146	0.847161	0.907927	0.792246	-0.271
cg05968233	chr19	6372277	6372278	+	0.011	0.754116	0.65305	0.638531	0.659963	0.629588	0.755434	0.68178	0.604485	0.523406	0.626845	0.562414	0.523241	0.593969	0.572393	0.109387
cg20752312	chr19	6372363	6372364	+	0.006	0.679876	0.575434	0.605371	0.686657	0.594237	0.681427	0.637167	0.560258	0.438301	0.436495	0.468441	0.531486	0.51427	0.491542	0.145625
cg14659346	chr2	233246431	233246432	+	0.008	0.136598	0.252076	0.114287	0.0364973	0.113392	0.177069	0.13832	0.510651	0.506858	0.216028	0.535908	0.311106	0.0922281	0.36213	-0.22381
cg23918296	chr14	103397019	103397020	+	0.016	0.0404345	0.184659	0.0561886	0.0814253	0.20332	0.117662	0.113948	0.172953	0.142325	0.206265	0.353596	0.254729	0.200909	0.221796	-0.107848
cg17665652	chr4	114214093	114214094	-	0.001	0.146399	0.280806	0.243998	0.228248	0.238398	0.124219	0.210344	0.283333	0.320316	0.274253	0.320328	0.369562	0.299647	0.31124	-0.100895
cg02226192	chr16	89461734	89461735	-	0.022	0.0800202	0.311232	0.125285	0.203536	0.158186	0.168307	0.174428	0.362888	0.171443	0.258679	0.344887	0.304507	0.233308	0.279285	-0.104858
cg08311935	chr16	89387805	89387806	-	0.002	0.417043	0.460177	0.483739	0.496892	0.472656	0.369407	0.449986	0.545452	0.544872	0.475499	0.542568	0.639086	0.601178	0.558109	-0.108124
cg25099065	chr2	69994225	69994226	+	0.021	0.295797	0.472366	0.357609	0.46681	0.395443	0.314784	0.383801	0.568876	0.502429	0.372396	0.418736	0.60858	0.546223	0.502873	-0.119072
cg16306978	chr2	21266953	21266954	+	0.017	0.24487	0.504003	0.392805	0.180353	0.270178	0.316398	0.318101	0.517038	0.425855	0.352481	0.383351	0.512881	0.456243	0.441308	-0.123207
cg03676624	chr11	77313686	77313687	-	0.034	0.288722	0.502226	0.316624	0.538786	0.387711	0.290295	0.387394	0.559531	0.541505	0.368473	0.451082	0.533701	0.5673	0.503599	-0.116204
cg15840039	chrX	66788098	66788099	+	0.032	0.157275	0.400502	0.227757	0.342337	0.26267	0.192814	0.263893	0.416703	0.368769	0.272617	0.317546	0.447116	0.369267	0.365336	-0.101444
cg10087172	chr12	15114494	15114495	-	0.011	0.877136	0.62976	0.732614	0.773305	0.716039	0.75669	0.74759	0.56461	0.613393	0.644053	0.647196	0.632715	0.629704	0.621945	0.125645
cg19128026	chr8	1792615	1792616	+	0.045	0.958728	0.612974	0.618112	0.955859	0.914951	0.586267	0.774482	0.936199	0.931472	0.942794	0.943677	0.947936	0.947557	0.941606	-0.167124
cg20864214	chr11	73054121	73054122	-	0.015	0.0761127	0.280493	0.0814947	0.168572	0.177543	0.192181	0.162733	0.249393	0.148257	0.300615	0.371305	0.323231	0.31651	0.284885	-0.122152
cg23603995	chr6	157198648	157198649	-	0.003	0.0340829	0.671867	0.487235	0.498058	0.0464974	0.498823	0.372761	0.661996	0.719696	0.525698	0.723741	0.70424	0.632977	0.661391	-0.288631
cg12785342	chr7	12728890	12728891	+	0.03	0.197856	0.495033	0.276161	0.416482	0.263807	0.284138	0.322246	0.529847	0.4567	0.352992	0.432474	0.395529	0.427371	0.432486	-0.11024
cg21649277	chr19	18117794	18117795	+	0.036	0.0477603	0.03605	0.0332632	0.0336532	0.0373867	0.0554619	0.0405959	0.381363	0.051312	0.450265	0.0442463	0.0302673	0.0559331	0.168898	-0.128302
cg05388262	chr4	76995796	76995797	+	0.026	0.122123	0.366044	0.217969	0.30809	0.223613	0.13955	0.229565	0.328088	0.269518	0.294453	0.315074	0.382885	0.400902	0.33182	-0.102255
cg24825446	chrX	25022499	25022500	+	0.049	0.183007	0.448106	0.153047	0.314371	0.204998	0.22716	0.255115	0.472994	0.352097	0.191839	0.416019	0.377602	0.353308	0.360643	-0.105528
cg26819695	chr11	123066956	123066957	-	0.026	0.0739197	0.373335	0.0963311	0.12791	0.205176	0.164948	0.173603	0.351143	0.37165	0.150825	0.366503	0.317216	0.282996	0.306722	-0.133119
cg09242610	chr2	9357556	9357557	-	0.028	0.154079	0.434822	0.246574	0.409199	0.293141	0.186633	0.287408	0.414146	0.424453	0.36143	0.410032	0.373588	0.423682	0.401222	-0.113814
cg20792436	chr17	79972570	79972571	-	0.003	0.280975	0.41284	0.386507	0.339424	0.333885	0.286428	0.34001	0.531686	0.410834	0.371129	0.463542	0.594619	0.440914	0.468787	-0.128777
cg02948125	chr17	7560317	7560318	+	0.024	0.220528	0.44901	0.290547	0.319656	0.347192	0.274914	0.316975	0.496714	0.336491	0.372077	0.371326	0.520483	0.405644	0.417122	-0.100148
cg12220696	chrX	77042017	77042018	-	0.002	0.648108	0.543786	0.604171	0.687339	0.652951	0.638251	0.629101	0.450364	0.492564	0.557341	0.400216	0.422266	0.422152	0.457484	0.171617
cg08992499	chr3	63956514	63956515	-	0.039	0.320928	0.598913	0.378956	0.509413	0.419511	0.292915	0.420106	0.587322	0.494611	0.445897	0.512406	0.582668	0.561802	0.530784	-0.110678
cg00590063	chr19	17918795	17918796	+	0.019	0.933521	0.878686	0.8994	0.866542	0.818317	0.94236	0.889804	0.778792	0.770737	0.856971	0.845826	0.677691	0.781558	0.785263	0.104541
cg13989999	chr20	30309717	30309718	-	0.021	0.0980635	0.389374	0.173624	0.276544	0.195653	0.175341	0.2181	0.399077	0.245452	0.300423	0.385774	0.349079	0.360054	0.339977	-0.121877
cg13935577	chr12	107974897	107974898	-	0.01	0.131296	0.394314	0.131226	0.228663	0.198447	0.235022	0.219828	0.350526	0.257472	0.355497	0.417574	0.394525	0.36436	0.356659	-0.136831
cg00889599	chr10	21810105	21810106	+	0.03	0.348405	0.608308	0.388323	0.648938	0.405744	0.315778	0.452583	0.567754	0.594424	0.530545	0.630422	0.618937	0.681469	0.603925	-0.151342
cg12864721	chr10	77164987	77164988	-	0.033	0.0765721	0.371798	0.0789808	0.25741	0.12999	0.146285	0.176839	0.310978	0.379741	0.0837735	0.434997	0.33748	0.360233	0.317867	-0.141028
cg08584759	chr10	11912126	11912127	+	0.027	0.0790976	0.290169	0.130928	0.128197	0.28764	0.15894	0.179162	0.267772	0.20653	0.208484	0.332178	0.349872	0.320461	0.280883	-0.101721
cg24626659	chr10	134754286	134754287	+	0.02	0.917136	0.684641	0.816891	0.813958	0.807462	0.813173	0.808877	0.671215	0.643634	0.709049	0.624635	0.74875	0.729717	0.687834	0.121043
cg17527422	chr12	48579245	48579246	+	0.011	0.224721	0.333293	0.292186	0.274898	0.303774	0.17388	0.267125	0.292938	0.336753	0.398067	0.318951	0.516105	0.342136	0.367492	-0.100366
cg21493873	chr14	57960754	57960755	+	0.011	0.327469	0.563934	0.347671	0.401645	0.391154	0.291831	0.387284	0.568907	0.53612	0.446359	0.52972	0.483336	0.490447	0.509148	-0.121864
cg23549534	chr14	77492902	77492903	-	0.011	0.171904	0.3497	0.25976	0.308943	0.321005	0.411047	0.303727	0.417079	0.365229	0.340228	0.502422	0.432682	0.44728	0.417487	-0.11376
cg04727522	chr18	77793182	77793183	-	0.042	0.880656	0.691592	0.755665	0.875821	0.781479	0.793538	0.796458	0.633083	0.720277	0.708217	0.750412	0.693492	0.630803	0.68938	0.107078
cg21977234	chr19	18701320	18701321	+	0.026	0.116458	0.339265	0.344883	0.248833	0.263523	0.264869	0.262972	0.338065	0.474142	0.20377	0.505859	0.469621	0.392234	0.397282	-0.13431
cg04827551	chr7	7268805	7268806	-	0.031	0.175408	0.405707	0.26642	0.180969	0.235983	0.144004	0.234749	0.501388	0.351643	0.272627	0.233118	0.381962	0.414817	0.359259	-0.124511
cg10092377	chr1	200880981	200880982	-	0.013	0.224249	0.227827	0.15861	0.142647	0.216639	0.180509	0.191747	0.707127	0.168774	0.32973	0.735201	0.763974	0.210305	0.485852	-0.294105
cg09163369	chr1	210001066	210001067	-	0.028	0.730937	0.529394	0.697635	0.711832	0.533766	0.735892	0.656576	0.498721	0.447721	0.491088	0.53418	0.400473	0.502368	0.479092	0.177484
cg23166289	chr1	210001082	210001083	-	0.013	0.627199	0.481323	0.592626	0.587936	0.485346	0.639175	0.568934	0.461088	0.387461	0.45223	0.475776	0.374401	0.428162	0.429853	0.139081
cg04289036	chr1	43751270	43751271	-	0.008	0.238199	0.375668	0.266001	0.275726	0.329815	0.349221	0.305771	0.338793	0.375717	0.384938	0.463959	0.461056	0.463654	0.414686	-0.108915
cg12760869	chr12	49727110	49727111	-	0.041	0.210347	0.507726	0.299701	0.305982	0.2782	0.426485	0.338074	0.537588	0.43193	0.285719	0.555147	0.464593	0.479986	0.45916	-0.121087
cg16516295	chr3	129147846	129147847	-	0.006	0.535621	0.530037	0.614633	0.512342	0.444202	0.439835	0.512778	0.682093	0.625272	0.50955	0.617094	0.659578	0.656733	0.625053	-0.112275
cg00991994	chr3	99639553	99639554	+	0.039	0.368894	0.518251	0.388087	0.525706	0.2995	0.314483	0.402487	0.57984	0.578019	0.430001	0.48302	0.624982	0.388295	0.514026	-0.111539
cg00795616	chr7	6867074	6867075	+	0.03	0.354606	0.558724	0.430046	0.636019	0.411054	0.384839	0.462548	0.636307	0.569255	0.559308	0.463308	0.766887	0.608763	0.600638	-0.13809
cg27168716	chr7	6866834	6866835	+	0.02	0.561477	0.616467	0.560132	0.644951	0.490234	0.56041	0.572279	0.620904	0.561049	0.731873	0.624869	0.886431	0.678306	0.683905	-0.111627
cg09423312	chr7	1163549	1163550	+	0.004	0.0840128	0.188053	0.0926487	0.10488	0.12926	0.084682	0.113923	0.26535	0.165942	0.150165	0.279522	0.241232	0.183759	0.214328	-0.100405
cg16175700	chr8	12829807	12829808	-	0.036	0.250415	0.43804	0.293124	0.360945	0.410521	0.299587	0.342105	0.42414	0.422102	0.373558	0.541927	0.54826	0.343344	0.442222	-0.100117
cg08578641	chr9	34457440	34457441	+	0.003	0.141547	0.282974	0.175007	0.201524	0.205957	0.170747	0.196293	0.260788	0.240002	0.325358	0.361459	0.326971	0.28002	0.2991	-0.102807
cg14078714	chr9	97711748	97711749	-	0.033	0.21098	0.515458	0.257285	0.320808	0.320125	0.251431	0.312681	0.556909	0.383776	0.306139	0.403852	0.437662	0.45819	0.424421	-0.11174
cg10941566	chr22	30117148	30117149	-	0.006	0.170123	0.359188	0.176086	0.2146	0.230594	0.242049	0.232107	0.377359	0.432061	0.251868	0.419193	0.248338	0.343042	0.34531	-0.113203
cg24891846	chr19	13319523	13319524	-	0.01	0.950826	0.849396	0.905007	0.917625	0.889772	0.922645	0.905879	0.767556	0.770011	0.917284	0.799647	0.727378	0.837666	0.803257	0.102621
cg02794451	chr12	2800446	2800447	-	0.045	0.0858747	0.334402	0.15794	0.241056	0.16937	0.187924	0.196094	0.240334	0.329249	0.154503	0.474798	0.298362	0.287349	0.297432	-0.101338
cg19685491	chr12	2800278	2800279	-	0.02	0.1382	0.385194	0.215785	0.213496	0.23846	0.263474	0.242435	0.276932	0.434733	0.204272	0.526716	0.409706	0.417858	0.37837	-0.135934
cg26325335	chr3	50402333	50402334	+	0.04	0.0398176	0.345885	0.097883	0.215113	0.112941	0.135469	0.157852	0.248605	0.367629	0.0967177	0.269713	0.302846	0.330976	0.269414	-0.111563
cg14113970	chr5	110789928	110789929	+	0.034	0.452857	0.591665	0.475332	0.742683	0.485204	0.45252	0.533377	0.66991	0.740994	0.526452	0.626506	0.658159	0.706057	0.65468	-0.121303
cg05981038	chr5	40841590	40841591	-	0.011	0.911053	0.783659	0.816072	0.819406	0.81986	0.852847	0.833816	0.763818	0.66778	0.815311	0.753734	0.679022	0.696071	0.729289	0.104527
cg18961064	chr13	111291248	111291249	-	0.021	0.77176	0.882786	0.718925	0.644177	0.686507	0.659311	0.727244	0.843534	0.839847	0.709205	0.920922	0.916243	0.855825	0.847596	-0.120352
cg07754492	chr2	202047754	202047755	+	0.019	0.780445	0.632887	0.696019	0.726417	0.794349	0.765654	0.732628	0.63327	0.602854	0.689534	0.56196	0.649734	0.582332	0.619947	0.112681
cg08469834	chr11	104839074	104839075	-	0.012	0.813339	0.64788	0.766343	0.772767	0.767828	0.789709	0.759644	0.700002	0.622207	0.685867	0.663322	0.57867	0.643816	0.648981	0.110663
cg05618647	chr11	104839281	104839282	-	0.018	0.691229	0.504596	0.586328	0.626485	0.597254	0.64325	0.60819	0.538792	0.481799	0.544248	0.506615	0.471657	0.459564	0.500446	0.107745
cg01687680	chr16	49312238	49312239	-	0.022	0.0853028	0.465953	0.184898	0.227232	0.212313	0.185547	0.226874	0.402694	0.389821	0.242007	0.42756	0.3996	0.472397	0.389013	-0.162139
cg02696327	chr16	49312543	49312544	+	0.049	0.432594	0.761791	0.401634	0.589175	0.500557	0.467999	0.525625	0.593751	0.68687	0.519988	0.733479	0.633425	0.738802	0.651053	-0.125428
cg04438525	chr16	49313307	49313308	+	0.011	0.139718	0.445122	0.208638	0.228073	0.281159	0.212232	0.25249	0.391925	0.420558	0.314541	0.434529	0.396537	0.422221	0.396718	-0.144228
cg06919440	chr16	49312560	49312561	+	0.015	0.355058	0.766513	0.377425	0.460078	0.498832	0.35366	0.468594	0.630864	0.73947	0.57426	0.712199	0.571541	0.710812	0.656524	-0.18793
cg01052864	chr5	215875	215876	-	0.044	0.537754	0.755958	0.552174	0.766359	0.548482	0.537369	0.616349	0.753775	0.718463	0.559741	0.810269	0.780727	0.800458	0.737239	-0.120889
cg18505593	chr14	100059479	100059480	-	0.001	0.255383	0.396294	0.311747	0.370779	0.35781	0.255823	0.324639	0.398037	0.441127	0.389881	0.439777	0.507575	0.426496	0.433816	-0.109176
cg14501977	chr12	124432994	124432995	-	0.048	0.319725	0.551202	0.382352	0.589855	0.470775	0.384468	0.449729	0.589082	0.549257	0.431514	0.481171	0.632168	0.634736	0.552988	-0.103259
cg13144783	chr3	46249795	46249796	+	0.014	0.128733	0.372925	0.472418	0.279452	0.223988	0.207418	0.280822	0.405261	0.490574	0.450672	0.445639	0.425466	0.288945	0.417759	-0.136937
cg08355301	chr17	62009651	62009652	+	0.006	0.934563	0.770351	0.854769	0.823962	0.858052	0.858586	0.850047	0.731601	0.739974	0.765279	0.672582	0.774458	0.751272	0.739194	0.110853
cg19576422	chr10	12256343	12256344	-	0.048	0.512624	0.70941	0.637292	0.696806	0.683893	0.391445	0.605245	0.709141	0.770537	0.590778	0.704897	0.702963	0.767892	0.707701	-0.102456
cg26180255	chr22	46856996	46856997	+	0.003	0.325424	0.575396	0.425796	0.45532	0.436886	0.303515	0.42039	0.588685	0.622103	0.480303	0.569089	0.610118	0.56143	0.571955	-0.151565
cg03287046	chr7	29519323	29519324	-	0.011	0.30907	0.551549	0.39129	0.453092	0.363473	0.311999	0.396746	0.558029	0.52729	0.455696	0.464087	0.68714	0.660231	0.558745	-0.162
cg08700454	chr11	74432028	74432029	-	0.026	0.195312	0.440622	0.269867	0.361527	0.304173	0.234142	0.300941	0.421583	0.336659	0.35945	0.602079	0.62036	0.343988	0.447353	-0.146413
cg23296791	chr19	40229766	40229767	+	0.021	0.787248	0.748146	0.692834	0.756232	0.714717	0.724871	0.737341	0.744939	0.632577	0.64394	0.579834	0.557404	0.638837	0.632922	0.104419
cg03670355	chrX	10126353	10126354	-	0.017	0.189819	0.363675	0.214296	0.372658	0.30724	0.223966	0.278609	0.378291	0.404036	0.258541	0.397292	0.469985	0.447849	0.392666	-0.114057
cg08333400	chrX	10126881	10126882	+	0.01	0.146319	0.301342	0.193252	0.258455	0.217182	0.180631	0.216197	0.342102	0.263134	0.233478	0.300494	0.43806	0.374456	0.325287	-0.109091
cg06666025	chr16	66613278	66613279	-	0.01	0.0594623	0.271479	0.167518	0.13707	0.221067	0.213354	0.178325	0.288274	0.397804	0.162083	0.358375	0.351931	0.289531	0.308	-0.129675
cg04154027	chr5	78985588	78985589	-	0	0.04248	0.143343	0.0578155	0.0863493	0.134132	0.121065	0.0975308	0.170787	0.15595	0.241212	0.301176	0.178551	0.189192	0.206145	-0.108614
cg24472823	chr7	51296131	51296132	+	0.04	0.305784	0.477798	0.343798	0.577897	0.394507	0.250247	0.391672	0.496193	0.497608	0.424434	0.435789	0.578959	0.590081	0.503844	-0.112172
cg19628686	chr6	33158503	33158504	+	0.045	0.258	0.425574	0.162551	0.323611	0.332631	0.246819	0.291531	0.449021	0.374174	0.255407	0.305185	0.70805	0.605957	0.449632	-0.158101
cg10502244	chr12	48399295	48399296	-	0.013	0.250788	0.434851	0.2631	0.363367	0.29046	0.277893	0.31341	0.393657	0.451858	0.348288	0.447049	0.362157	0.513569	0.41943	-0.10602
cg23008352	chr13	110951025	110951026	-	0.049	0.803057	0.629155	0.710258	0.70764	0.754651	0.790887	0.732608	0.613655	0.615803	0.711688	0.668678	0.52453	0.655226	0.631597	0.101011
cg17453840	chr15	83317526	83317527	-	0.023	0.0889209	0.387622	0.156206	0.288491	0.145499	0.194475	0.210202	0.309963	0.307891	0.267654	0.358326	0.462253	0.393443	0.349922	-0.139719
cg23506728	chr3	131280698	131280699	+	0.026	0.463219	0.596334	0.378645	0.423412	0.520856	0.372237	0.459117	0.609234	0.644329	0.534581	0.486319	0.568557	0.524926	0.561324	-0.102207
cg16616467	chr16	89642914	89642915	-	0.035	0.079512	0.378871	0.130909	0.0837034	0.200529	0.2082	0.180287	0.530295	0.166685	0.216023	0.356198	0.257938	0.379142	0.317714	-0.137426
cg13940125	chr1	197237119	197237120	+	0.017	0.520361	0.539626	0.445029	0.617334	0.505087	0.364523	0.49866	0.573751	0.621706	0.527552	0.544103	0.728543	0.652192	0.607975	-0.109314
cg26853855	chr2	166428866	166428867	-	0.006	0.265019	0.387826	0.266006	0.298458	0.270649	0.190185	0.27969	0.359323	0.349586	0.3794	0.364878	0.483871	0.381064	0.386354	-0.106663
cg09631192	chr20	23583594	23583595	+	0.044	0.380899	0.600459	0.408158	0.676767	0.399906	0.404557	0.478458	0.596348	0.649251	0.541468	0.567178	0.548054	0.614511	0.586135	-0.107677
cg12097273	chr17	4638529	4638530	-	0.044	0.710049	0.614156	0.434317	0.745502	0.682574	0.639785	0.637731	0.742791	0.855847	0.862534	0.670593	0.629934	0.705337	0.744506	-0.106775
cg03626672	chr2	237478664	237478665	-	0.002	0.144305	0.234287	0.147348	0.146619	0.209369	0.211063	0.182165	0.215493	0.286599	0.339995	0.366391	0.331012	0.222661	0.293692	-0.111527
cg01997953	chrX	30595690	30595691	+	0.021	0.770849	0.669311	0.664345	0.702684	0.792447	0.743769	0.723901	0.471572	0.640938	0.699366	0.595598	0.611224	0.581216	0.599986	0.123915
cg20290367	chr17	20060457	20060458	-	0.042	0.244205	0.527285	0.303389	0.484206	0.407049	0.226946	0.365513	0.495637	0.475083	0.381581	0.457055	0.601049	0.512366	0.487128	-0.121615
cg08906015	chr19	47157825	47157826	+	0.045	0.0692139	0.385373	0.117976	0.204262	0.152079	0.172894	0.183633	0.367974	0.196562	0.182054	0.338704	0.309158	0.367651	0.293684	-0.110051
cg09767822	chr11	20178040	20178041	+	0.015	0.0578184	0.245501	0.0682704	0.196928	0.111835	0.0762547	0.126101	0.144469	0.39576	0.0893554	0.359094	0.361934	0.302133	0.275458	-0.149356
cg07344627	chrX	125687011	125687012	+	0.04	0.513068	0.597979	0.461612	0.547268	0.530781	0.364059	0.502461	0.671854	0.610925	0.680267	0.582752	0.72995	0.398561	0.612385	-0.109924
cg09189889	chr13	95132211	95132212	-	0.008	0.201747	0.391153	0.297131	0.337705	0.289005	0.20523	0.286995	0.430088	0.414731	0.310413	0.378109	0.464725	0.382089	0.396692	-0.109697
cg00647317	chr7	50633725	50633726	-	0.015	0.370873	0.605219	0.398744	0.480447	0.389971	0.354519	0.433296	0.61304	0.592603	0.410266	0.685952	0.505414	0.583821	0.565183	-0.131887
cg08379738	chr19	6477033	6477034	-	0.004	0.238289	0.366957	0.303279	0.188653	0.276173	0.227864	0.266869	0.354237	0.323083	0.363096	0.424696	0.449291	0.372609	0.381168	-0.114299
cg12014181	chr10	729479	729480	+	0.02	0.293274	0.355826	0.362704	0.290178	0.405323	0.215531	0.320473	0.31071	0.422505	0.413177	0.373683	0.580644	0.519295	0.436669	-0.116196
cg12808565	chr10	729259	729260	+	0.009	0.287309	0.444932	0.345961	0.365308	0.395458	0.247993	0.347827	0.421855	0.493667	0.42691	0.393845	0.597003	0.467419	0.466783	-0.118956
cg14072016	chr10	384652	384653	+	0.042	0.138908	0.429275	0.297333	0.38057	0.363766	0.162009	0.29531	0.42656	0.457825	0.357555	0.295592	0.554998	0.440759	0.422215	-0.126905
cg16936421	chr10	729226	729227	-	0.001	0.367834	0.446171	0.419932	0.406522	0.459133	0.321644	0.403539	0.50983	0.506717	0.452724	0.466053	0.603475	0.547049	0.514308	-0.110769
cg21898226	chr2	218231392	218231393	+	0.028	0.270897	0.560784	0.342358	0.392445	0.413523	0.250677	0.371781	0.58956	0.495085	0.370028	0.426958	0.561318	0.54287	0.497636	-0.125856
cg20124223	chr11	111847692	111847693	+	0.003	0.117586	0.294858	0.20441	0.191103	0.256671	0.148649	0.202213	0.298084	0.320171	0.315655	0.379255	0.264916	0.301068	0.313192	-0.110979
cg01120132	chr19	31640711	31640712	+	0.026	0.398807	0.586577	0.438894	0.580383	0.47641	0.412973	0.482341	0.609332	0.615579	0.457833	0.555213	0.644884	0.61441	0.582875	-0.100534
cg00495303	chr18	3771110	3771111	+	0.029	0.145173	0.302571	0.170459	0.119423	0.101016	0.138678	0.162887	0.448934	0.146659	0.26395	0.366669	0.283359	0.178541	0.281352	-0.118465
cg15833940	chr8	1526540	1526541	+	0.03	0.309844	0.445041	0.355051	0.456799	0.439441	0.456089	0.410378	0.510456	0.671831	0.364509	0.515304	0.636304	0.480294	0.529783	-0.119405
cg05035143	chr13	43597297	43597298	-	0.04	0.23121	0.264377	0.279841	0.486117	0.371905	0.309322	0.323795	0.387051	0.578327	0.34798	0.512501	0.330922	0.44229	0.433179	-0.109383
cg00611227	chr2	116122048	116122049	-	0.004	0.494424	0.631439	0.505844	0.509397	0.40398	0.411499	0.492764	0.683758	0.6339	0.629949	0.735934	0.625844	0.873235	0.697103	-0.204339
cg08826743	chr8	105392295	105392296	+	0.01	0.373093	0.47172	0.328911	0.362559	0.449194	0.297784	0.380543	0.543834	0.560969	0.383991	0.48324	0.463045	0.455438	0.481753	-0.101209
cg17695462	chr10	133999320	133999321	+	0.034	0.126288	0.429332	0.216612	0.260976	0.264406	0.294087	0.265283	0.429809	0.474538	0.189058	0.367542	0.384201	0.417583	0.377122	-0.111839
cg22788243	chr4	36285698	36285699	+	0.045	0.300606	0.59723	0.330732	0.448149	0.399789	0.349364	0.404312	0.551256	0.484093	0.368062	0.45926	0.631366	0.633313	0.521225	-0.116913
cg17889682	chr7	95402733	95402734	+	0.013	0.142667	0.412561	0.189017	0.289702	0.240963	0.271167	0.257679	0.391601	0.333998	0.34125	0.317346	0.429746	0.404662	0.369767	-0.112088
cg05450477	chr6	20426845	20426846	-	0.032	0.323079	0.677859	0.374433	0.638662	0.424981	0.37567	0.469114	0.654099	0.625279	0.475925	0.593106	0.711703	0.644686	0.617466	-0.148352
cg02812891	chr2	233251773	233251774	-	0.005	0.0287423	0.24327	0.0838718	0.133126	0.120649	0.0310798	0.10679	0.242154	0.1356	0.195272	0.38233	0.265068	0.293713	0.252356	-0.145566
cg09490371	chr2	233253024	233253025	-	0.003	0.207684	0.398802	0.176701	0.271877	0.278479	0.179305	0.252141	0.376706	0.331068	0.423298	0.520753	0.403801	0.398195	0.40897	-0.156829
cg13138089	chr2	233251770	233251771	-	0.003	0.0910923	0.394362	0.149664	0.211438	0.250408	0.102681	0.199941	0.373921	0.272313	0.411684	0.534277	0.424752	0.441943	0.409815	-0.209874
cg17204652	chr2	233252706	233252707	+	0.011	0.137361	0.293885	0.15042	0.182119	0.235388	0.184229	0.197234	0.288187	0.197084	0.343272	0.389892	0.291704	0.281594	0.298622	-0.101389
cg24767131	chr2	233251881	233251882	-	0.002	0.036603	0.267743	0.142535	0.109526	0.145733	0.0893116	0.131909	0.275159	0.149738	0.318908	0.436593	0.421013	0.347605	0.324836	-0.192928
cg25560398	chr2	233252170	233252171	-	0.007	0.13699	0.362057	0.204061	0.26261	0.260013	0.204884	0.238436	0.383004	0.257007	0.373705	0.458306	0.439073	0.386581	0.382946	-0.14451
cg11103390	chr10	11784920	11784921	-	0.039	0.35427	0.651078	0.168352	0.31035	0.379089	0.453764	0.386151	0.595663	0.479976	0.430049	0.671143	0.631636	0.438806	0.541212	-0.155062
cg18361975	chr5	106738731	106738732	-	0.016	0.323836	0.500196	0.300393	0.380332	0.363058	0.296438	0.360709	0.486154	0.519344	0.409844	0.434052	0.418885	0.497522	0.460967	-0.100258
cg18454133	chr14	23835870	23835871	+	0.019	0.0613148	0.388915	0.132063	0.190705	0.165196	0.174787	0.185497	0.365039	0.231492	0.315455	0.409501	0.252287	0.320363	0.31569	-0.130193
cg12967164	chr7	1753637	1753638	+	0.029	0.0593865	0.439262	0.200825	0.345021	0.193977	0.236718	0.245865	0.447376	0.372604	0.260349	0.333785	0.44314	0.401837	0.376515	-0.13065
cg22355889	chr11	107461585	107461586	+	0.01	0.059419	0.0683234	0.0502255	0.0404035	0.073714	0.0582226	0.0583847	0.0880777	0.0875086	0.0718802	0.599526	0.0678199	0.0616376	0.162742	-0.104357
cg04768463	chr2	55174473	55174474	-	0.015	0.216374	0.338242	0.316472	0.374623	0.313267	0.20735	0.294388	0.413052	0.417137	0.28746	0.35722	0.522108	0.416129	0.402184	-0.107796
cg09444531	chr8	120615567	120615568	-	0.017	0.48867	0.683419	0.499935	0.511978	0.630049	0.518401	0.555409	0.687859	0.672736	0.542489	0.662727	0.777183	0.669373	0.668728	-0.113319
cg16786808	chr2	222434497	222434498	+	0.018	0.17189	0.235721	0.204606	0.255183	0.212368	0.119344	0.199852	0.181708	0.483973	0.207407	0.356595	0.286132	0.335033	0.308475	-0.108623
cg16327891	chr13	43566633	43566634	+	0.05	0.797683	0.565154	0.710112	0.674728	0.7381	0.731327	0.702851	0.580139	0.590035	0.68876	0.56639	0.477927	0.524403	0.571276	0.131575
cg00158227	chr1	6514781	6514782	+	0.05	0.126951	0.489989	0.234425	0.412812	0.168506	0.259993	0.282113	0.211326	0.585092	0.232432	0.583255	0.509375	0.473443	0.432487	-0.150375
cg10210806	chr1	6514605	6514606	+	0.038	0.0121527	0.301884	0.0318316	0.129666	0.0349303	0.100498	0.101827	0.0328538	0.415468	0.0951338	0.392271	0.305796	0.259247	0.250128	-0.148301
cg26419880	chr1	6515624	6515625	+	0.024	0.0202827	0.293623	0.0505328	0.120735	0.0341891	0.0741832	0.0989243	0.0556553	0.400063	0.0513612	0.428238	0.355882	0.310493	0.266949	-0.168024
cg26815404	chr1	6500700	6500701	+	0.049	0.0107978	0.233916	0.0162477	0.106997	0.0117264	0.0126577	0.0653906	0.0180713	0.294179	0.0119643	0.321282	0.317529	0.205272	0.194716	-0.129326
cg04063345	chr6	152130058	152130059	-	0.012	0.357862	0.294684	0.222625	0.352609	0.21441	0.318315	0.293417	0.33176	0.342463	0.339774	0.517188	0.477614	0.440711	0.408252	-0.114834
cg15626350	chr6	152130207	152130208	-	0.015	0.108896	0.299951	0.132919	0.155404	0.114253	0.173036	0.164076	0.257343	0.161242	0.276631	0.35931	0.279856	0.283159	0.26959	-0.105513
cg09106903	chr1	217309568	217309569	-	0.02	0.217963	0.448135	0.259397	0.272436	0.27173	0.249492	0.286525	0.389991	0.497817	0.348708	0.454857	0.354388	0.300605	0.391061	-0.104535
cg08998593	chr6	515813	515814	+	0.044	0.474125	0.572673	0.55841	0.738237	0.696298	0.670554	0.618383	0.878642	0.693941	0.576942	0.675122	0.871723	0.792891	0.74821	-0.129827
cg24123106	chr6	123100471	123100472	-	0.023	0.160828	0.40359	0.251776	0.239665	0.278488	0.145193	0.24659	0.37586	0.325918	0.297286	0.343801	0.403534	0.339946	0.347724	-0.101134
cg18479255	chr13	51797793	51797794	+	0.038	0.175241	0.456284	0.256895	0.434794	0.295085	0.257487	0.312631	0.451202	0.408699	0.305499	0.403132	0.589787	0.477798	0.439353	-0.126722
cg23766254	chr17	42431859	42431860	-	0.027	0.781145	0.722683	0.657417	0.622673	0.702752	0.651424	0.689682	0.495874	0.50986	0.675089	0.612383	0.562173	0.571578	0.571159	0.118523
cg06225923	chr16	88797506	88797507	+	0.002	0.646822	0.744165	0.410336	0.716774	0.676114	0.663056	0.642878	0.935998	0.874033	0.806172	0.729246	0.773744	0.841633	0.826804	-0.183926
cg26339788	chrX	153745603	153745604	+	0.001	0.0762623	0.20174	0.0822855	0.119767	0.159976	0.130847	0.12848	0.232118	0.203538	0.192388	0.256795	0.346803	0.266389	0.249672	-0.121192
cg07290269	chr12	31479853	31479854	-	0.004	0.0783108	0.27498	0.0893504	0.202357	0.187171	0.123854	0.159337	0.252273	0.235501	0.269302	0.288495	0.313438	0.249761	0.268129	-0.108791
cg21329507	chrX	119445530	119445531	+	0.019	0.247537	0.373488	0.264122	0.453579	0.303574	0.246185	0.314748	0.460003	0.404316	0.318514	0.480926	0.388026	0.455551	0.417889	-0.103142
cg17505155	chr13	98824355	98824356	+	0.01	0.17582	0.249451	0.191285	0.193725	0.196478	0.169017	0.195963	0.306645	0.328251	0.173214	0.352021	0.40929	0.251624	0.303508	-0.107545
cg01807313	chr12	117407970	117407971	-	0.021	0.484217	0.570956	0.455081	0.546719	0.534609	0.402255	0.498973	0.557746	0.654205	0.502162	0.544981	0.718841	0.685038	0.610496	-0.111523
cg16111737	chr12	117408163	117408164	-	0.031	0.243788	0.500847	0.374292	0.502063	0.46478	0.340444	0.404369	0.518533	0.571666	0.454039	0.450521	0.586634	0.484498	0.510982	-0.106613
cg19931491	chr11	125328008	125328009	+	0.012	0.132187	0.445102	0.194837	0.259987	0.262362	0.275448	0.261654	0.454195	0.283602	0.374751	0.436432	0.401588	0.428342	0.396485	-0.134831
cg18699025	chr4	1008550	1008551	-	0.034	0.34168	0.569198	0.251884	0.506256	0.445451	0.398527	0.418833	0.566423	0.488808	0.470723	0.480142	0.598755	0.58119	0.531007	-0.112174
cg00702647	chr1	15655764	15655765	+	0.043	0.538064	0.467527	0.499677	0.586289	0.558213	0.527699	0.529578	0.495471	0.380691	0.513898	0.416758	0.377042	0.366465	0.425054	0.104524
cg07928083	chr15	60295312	60295313	-	0.041	0.0662203	0.212961	0.104967	0.281204	0.101852	0.106489	0.145615	0.123419	0.294561	0.0971087	0.402265	0.251706	0.309975	0.246506	-0.100891
cg14644418	chr10	129536661	129536662	+	0.005	0.236489	0.383957	0.224335	0.249686	0.24846	0.237226	0.263359	0.445717	0.352285	0.385013	0.431695	0.334169	0.357142	0.384337	-0.120978
cg19509778	chr10	129537308	129537309	-	0.008	0.126544	0.347639	0.149621	0.191291	0.159732	0.187598	0.193738	0.323442	0.273012	0.306147	0.359316	0.288195	0.265594	0.302618	-0.10888
cg14506515	chr9	14749903	14749904	+	0.006	0.572116	0.620677	0.519698	0.557607	0.586486	0.490963	0.557925	0.575754	0.747169	0.660696	0.738332	0.624261	0.627147	0.662226	-0.104302
cg22614927	chr1	24195587	24195588	+	0.035	0.599274	0.414882	0.517917	0.470754	0.552897	0.500575	0.509383	0.428903	0.447503	0.428221	0.369681	0.327177	0.324064	0.387592	0.121792
cg10961323	chr1	24127976	24127977	-	0.012	0.23358	0.487876	0.381272	0.281918	0.353797	0.352602	0.348507	0.456215	0.415703	0.406967	0.472005	0.47192	0.496086	0.453149	-0.104642
cg02501714	chr9	89560185	89560186	-	0.011	0.244599	0.385979	0.269092	0.341706	0.285693	0.177924	0.284165	0.313925	0.474347	0.404069	0.328546	0.439841	0.467355	0.404681	-0.120515
cg03044573	chr1	173835265	173835266	+	0.033	0.521878	0.760864	0.602729	0.837867	0.621739	0.665531	0.668435	0.785007	0.809031	0.738798	0.775231	0.798808	0.752229	0.776517	-0.108082
cg17124583	chr10	8097641	8097642	-	0.047	0.179719	0.43695	0.202034	0.329918	0.227508	0.209036	0.264194	0.318028	0.448455	0.211504	0.435615	0.376898	0.411707	0.367034	-0.10284
cg22892607	chr10	8102583	8102584	+	0.037	0.402713	0.624027	0.305984	0.653929	0.41487	0.392476	0.465667	0.495105	0.661029	0.485779	0.661664	0.625156	0.6659	0.599105	-0.133439
cg09297288	chr2	237075188	237075189	+	0.049	0.118634	0.449634	0.124013	0.408201	0.24352	0.197488	0.256915	0.372557	0.475267	0.189118	0.51122	0.379382	0.421201	0.391458	-0.134543
cg04555966	chr7	44185986	44185987	+	0.029	0.211878	0.35125	0.232548	0.360996	0.317911	0.354086	0.304778	0.508456	0.375109	0.261421	0.495214	0.315429	0.503481	0.409852	-0.105074
cg02964172	chr6	10599459	10599460	+	0.015	0.494576	0.876208	0.6331	0.767103	0.827759	0.677986	0.712789	0.871258	0.873663	0.774903	0.864399	0.906252	0.908496	0.866495	-0.153706
cg09764075	chrX	69641858	69641859	+	0.006	0.148197	0.355756	0.286481	0.277519	0.24989	0.19811	0.252659	0.4072	0.336888	0.289935	0.347656	0.39109	0.365686	0.356409	-0.10375
cg11366849	chr7	42267547	42267548	-	0.035	0.223588	0.466059	0.242439	0.439634	0.277635	0.278747	0.32135	0.393268	0.437976	0.291321	0.575682	0.563939	0.521426	0.463935	-0.142585
cg22289763	chr7	42173065	42173066	+	0.023	0.402566	0.56191	0.337608	0.468908	0.32094	0.306048	0.399663	0.544593	0.503358	0.419531	0.475359	0.571043	0.541012	0.50915	-0.109486
cg21527411	chr11	58499409	58499410	-	0.049	0.392482	0.876244	0.507083	0.922285	0.529175	0.541775	0.628174	0.780285	0.875338	0.65701	0.855555	0.872243	0.894763	0.822532	-0.194358
[truncated: 709 more rows]

## Sheet: Bivalent Domain CpGs
	probeID	CpG_chrm	CpG_beg	CpG_end	E081
1	cg00000029	chr16	53468111	53468113	1_TssA
[truncated: 2,955 more rows]
